# Supplementary material for: Directing group assisted meta-hydroxylation by C–H activation
Source: PubMed Central journal article supplement — Chem Sci. 2016 Jan 21;7(5):3147–53. doi: 10.1039/c5sc04060d (PMC6005269; doi:10.1039/c5sc04060d), 2016-01-21
Supplement: SC-007-C5SC04060D-s001.pdf [file SC-007-C5SC04060D-s001.pdf]

# Directing Group Assisted *meta*-Hydroxylation by C-H Activation

Arun Maji, Bangaru Bhaskararao, Santanu Singha, Raghavan B. Sunoj,\* Debabrata Maiti\*

Department of Chemistry, Indian Institute of Technology Bombay, Powai,  
Mumbai 400076, India

E-mail: [dmaiti@chem.iitb.ac.in](mailto:dmaiti@chem.iitb.ac.in) (D. Maiti)  
[sunoj@chem.iitb.ac.in](mailto:sunoj@chem.iitb.ac.in) (R. B. Sunoj)

# Table of Content

|                                                                                      | <b>Page</b> |
|--------------------------------------------------------------------------------------|-------------|
| I. General considerations:                                                           | S3          |
| II. Optimization:                                                                    |             |
| A. Optimization details for <i>meta</i> –hydroxylation                               | S4          |
| B. Optimization details for <i>meta</i> –acetoxylation                               | S9          |
| III. General Procedure:                                                              |             |
| A. General Procedure A: Procedure for <i>meta</i> -hydroxylation                     | S14         |
| B. General Procedure B: Procedure for <i>meta</i> -acetoxylation                     | S15         |
| C. General Procedure C: Procedure for sulphonate ester synthesis                     | S15         |
| IV. Characterization:                                                                |             |
| A. Characterization of substrate                                                     | S16         |
| B. Characterization of <i>meta</i> -hydroxylated compounds                           | S18         |
| C. Characterization of <i>meta</i> -acetoxyated compounds                            | S25         |
| V. Mechanistic Study:                                                                |             |
| A. Identification of intermediate (hydroxylation)                                    | S32         |
| B. Determination of order and KIE                                                    | S33         |
| C. NMR Study                                                                         | S36         |
| D. Mass Study                                                                        | S38         |
| E. IR Study                                                                          | S39         |
| VI. Application:                                                                     | S40         |
| VII. Computational Methods:                                                          | S44         |
| VIII. Case Study:                                                                    |             |
| A. Hydroxylation product using N-Formyl-Glycine                                      | S44         |
| B. Acetoxylation product using Boc-Ala-OH                                            | S49         |
| IX. Hydrolysis of Trifluoroacetoxy and Acetoxy Products:                             | S55         |
| X. Comparison of <i>meta</i> , <i>ortho</i> , and <i>para</i> C-H activation TS..... | S56         |
| XI. References:                                                                      | S58         |
| XII. NMR Characterization:                                                           |             |
| A. NMR Characterization of Substrates                                                | S60         |
| B. NMR Characterization of the <i>meta</i> -hydroxylated compounds                   | S68         |
| C. NMR Characterization of the <i>meta</i> -acetoxyated compounds                    | S85         |
| XIV. Cartesian Coordinates:                                                          | S113        |

## I. General considerations:

**Reagent Information:** Unless otherwise stated, all reactions were carried out under atmospheric condition in screw cap reaction tubes. All solvents were bought from Merck/Aldrich/ TCI in sure-seal bottle and were used as received. For column chromatography, silica gel (60–120 mesh or 100–200 mesh) obtained from SRL Co. and neutral activated alumina from Spectrochem was used. A gradient elution using pet ether and ethyl acetate was performed, based on Merck aluminum TLC sheets (silica gel 60F<sub>254</sub>). Benzyl halides were obtained from Aldrich/ TCI/Alfa Aeser and Spectrochem. HFIP was used from TCI.

**Analytical Information:** All isolated compounds were characterized by <sup>1</sup>H, <sup>13</sup>C NMR spectroscopy, mass analysis and IR spectroscopy. Copies of the <sup>1</sup>H NMR, <sup>13</sup>C NMR and few NOE spectra can be found in the supporting information. Unless otherwise stated, all Nuclear Magnetic Resonance spectra were recorded on a Bruker 400 MHz instrument. Some Nuclear Magnetic Resonance was taken on a Bruker 500 MHz instrument. All <sup>1</sup>H NMR experiments are reported in units, parts per million (ppm), and were measured relative to the signals for residual chloroform (7.26 ppm) in the deuterated solvent, unless otherwise stated. All <sup>13</sup>C NMR spectra were reported in ppm relative to deuteriochloroform (77.23 ppm), unless otherwise stated, and all were obtained with <sup>1</sup>H decoupling. The NMR yields were calculated using 1,3,5-trimethoxybenzene as the reference. High-resolution mass spectra (HRMS) were recorded on a micro-mass ESI TOF (time of flight) mass spectrometer. Neat infrared spectra were recorded on a Perkin-Elmer spectrum one FT-IR spectrometer. The data was recorded in transmittance mode (%T, cm<sup>-1</sup>).

### Description of Reaction Tube:

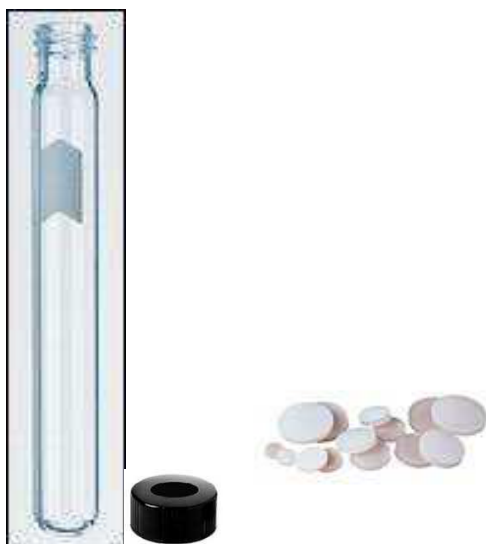

**Fig A.** Pictorial description of reaction tube for demethylenation: Fisher brand Disposable Borosilicate Glass Tubes (16\*125mm) with Threaded End (Fisher Scientific Order No.1495935A) [left]; Kimble Black Phenolic Screw Thread Closures with Open Tops (Fisher Scientific Order No. 033407E) [middle]; Thermo Scientific National PTFE/Silicone Septa for Sample Screw Thread Caps (Fisher Scientific Order No. 03394A) [right].

## II. Optimization:

### A. Optimization details for *meta* –hydroxylation:

Table S1: Solvent Optimization

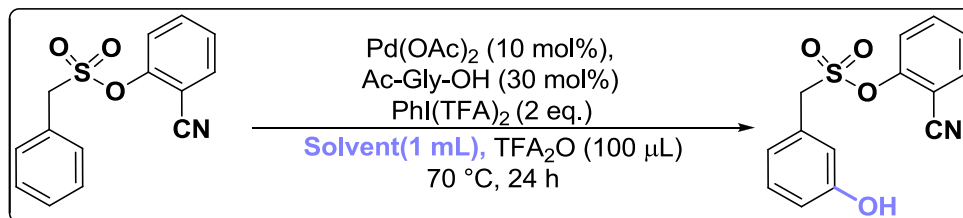

|          | Solvent               | Yield ( <i>meta</i> :others) |
|----------|-----------------------|------------------------------|
| <b>1</b> | <b>HFIP</b>           | <b>28% (multiple pdts)</b>   |
| 2        | Trifluoroethanol(TFE) | 10% (multiple pdts)          |
| 3        | DCE                   | n.d                          |
| 4        | DCM                   | n.d                          |
| 5        | Trifluorotoluene      | n.d                          |
| 6        | Toluene               | n.d                          |
| 7        | MeCN                  | n.d                          |
| 8        | Dioxane               | n.d                          |
| 9        | DMF                   | n.d                          |
| 10       | DMSO                  | n.d                          |
| 11       | NMP                   | n.d                          |
| 12       | DMA                   | n.d                          |
| 13       | Sulpholane            | n.d                          |
| 14       | THF                   | n.d                          |
| 15       | Isopropanol           | n.d                          |
| 16       | MeOH                  | n.d                          |
| 17       | EtOH                  | n.d                          |
| 18       | t-BuOH                | n.d                          |
| 19       | HFIP:DCE (1:1)        | 18% (multiple pdts)          |
| 20       | HFIP:DCE (1:9)        | 5% (multiple pdts)           |
| 21       | HFIP:DCE (9:1)        | 23% (multiple pdts)          |
| 22       | HFIP : TFE (1:1)      | 21% (multiple pdts)          |
| 23       | HFIP : TFE (1:9)      | 8% (multiple pdts)           |
| 24       | HFIP : TFE (9:1)      | 25% (multiple pdts)          |

**Table S2:** Solvent amount optimization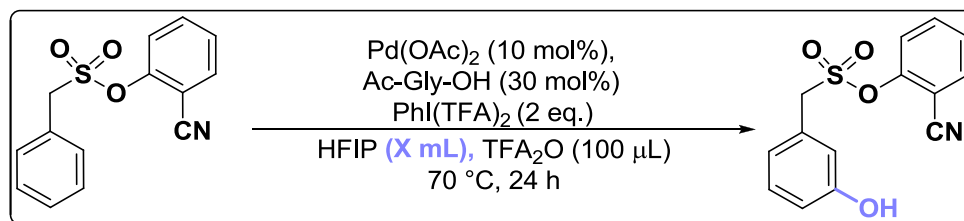

|   | Amount        | Yield (meta:others)        |
|---|---------------|----------------------------|
| 1 | 0.3 mL        | 20% (multiple pdts)        |
| 2 | <b>0.5 mL</b> | <b>32% (multiple pdts)</b> |
| 3 | 0.7 mL        | 30% (multiple pdts)        |
| 4 | 1.0 mL        | 28% (multiple pdts)        |
| 5 | 1.25 mL       | 27% (multiple pdts)        |
| 6 | 1.5 mL        | 25% (multiple pdts)        |
| 7 | 2 mL          | 18% (multiple pdts)        |
| 8 | 3 mL          | 5% (multiple pdts)         |
| 9 | 4 mL          | n.d                        |

**Table S3:** Ligand optimization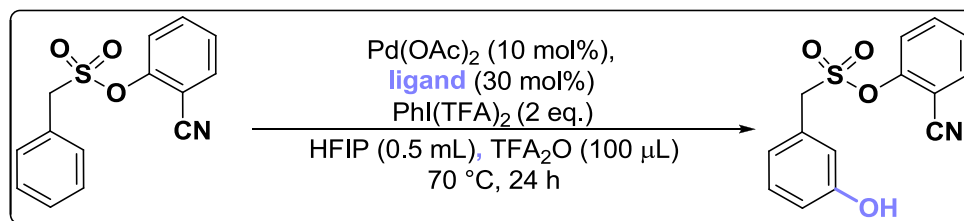

|    | Ligand (30%)      | Yield (meta:others) |
|----|-------------------|---------------------|
| 1  | Ac-Gly-OH         | 32% (multiple pdts) |
| 2  | <b>For-Gly-OH</b> | <b>44% (5:2:1)</b>  |
| 3  | Boc-Gly-OH        | 23% (multiple pdts) |
| 4  | Ac-Ala-OH         | 25% (multiple pdts) |
| 5  | Piv-Ala-OH        | 23% (multiple pdts) |
| 6  | Benzoyl-Ala-OH    | 23% (multiple pdts) |
| 7  | Boc-Ala-OH        | 27% (multiple pdts) |
| 8  | Ac-Phe-OH         | 23% (multiple pdts) |
| 9  | Boc-Phe-OH        | 23% (multiple pdts) |
| 10 | Z-Gly-OH          | 36% (multiple pdts) |
| 11 | Boc-PheGly-OH     | 27% (multiple pdts) |
| 12 | Ac-Gly-ethylester | 18% (multiple pdts) |

|           |                                                      |                     |
|-----------|------------------------------------------------------|---------------------|
| 13        | Ac-PheGly-OH                                         | 14% (multiple pdts) |
| 14        | Z-Ala-OH                                             | 32% (multiple pdts) |
| 15        | Z-Phe-OH                                             | 36% (multiple pdts) |
| 16        | Benzoyl-b-Ala-OH                                     | 27% (multiple pdts) |
| 17        | Boc-Aib-OH                                           | 23% (multiple pdts) |
| <b>18</b> | <b>1-(Boc-amino)cyclopentane<br/>carboxylic acid</b> | <b>42% (6:1)</b>    |
| 19        | Glycylglycine                                        | 12% (multiple pdts) |
| 20        | Fmoc-L-Ala-OH                                        | 5% (multiple pdts)  |
| 21        | Glycine                                              | 5% (multiple pdts)  |

**Table S4:** Ligand amount optimization

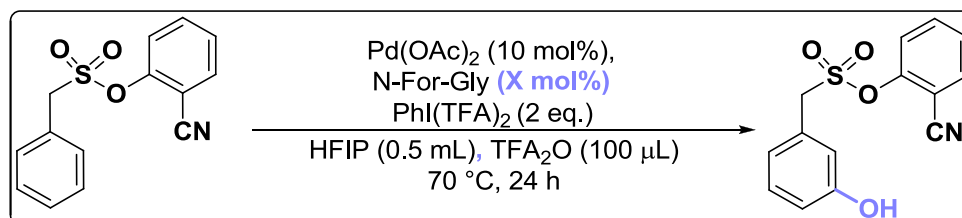

|          | Amount     | Yield (meta:others) |
|----------|------------|---------------------|
| 1        | 10%        | 30% (multiple pdts) |
| 2        | 15%        | 36% (multiple pdts) |
| 3        | 20%        | 42% (6:2)           |
| <b>4</b> | <b>25%</b> | <b>48% (7:2)</b>    |
| 5        | 30%        | 44% (5:2)           |

**Table S5:** Pd-salt optimization

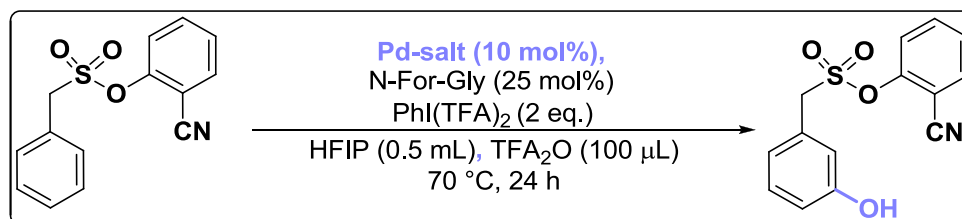

|          | Pd-salt                                  | Yield (meta:others) |
|----------|------------------------------------------|---------------------|
| <b>1</b> | <b>Pd(OAc)<sub>2</sub></b>               | <b>48% (7:2)</b>    |
| <b>2</b> | <b>Pd(CF<sub>3</sub>COO)<sub>2</sub></b> | <b>44% (7:3)</b>    |
| 3        | Pd(piv) <sub>2</sub>                     | 42% (5:2)           |
| 4        | Pd(acac) <sub>2</sub>                    | 10% (3:1)           |

|    |                                                |                     |
|----|------------------------------------------------|---------------------|
| 5  | $\text{PdSO}_4$                                | n.d                 |
| 6  | $\text{Pd}(\text{PPh}_3)_2\text{Cl}_2$         | n.d                 |
| 7  | $\text{Pd}(\text{dppf})\text{Cl}_2$            | n.d                 |
| 8  | $\text{PdCl}_2$                                | 25% (multiple pdts) |
| 9  | $\text{Pd}(\text{CH}_3\text{CN})_2\text{Cl}_2$ | 20% (multiple pdts) |
| 10 | $\text{Pd}_2(\text{dba})_3$                    | n.d                 |
| 11 | $\text{Pd}(\text{COD})\text{Cl}_2$             | n.d                 |

**Table S6:** Temperature optimization

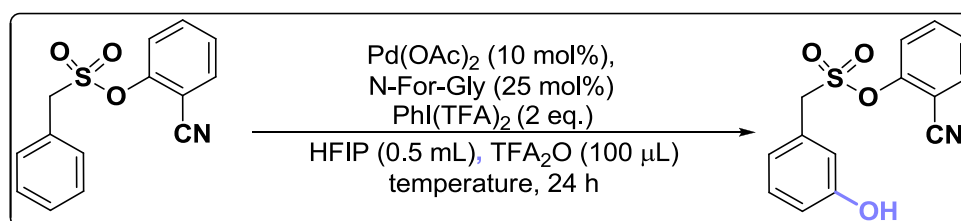

|          | Temperature  | Yield (meta:others) |
|----------|--------------|---------------------|
| 1        | RT           | n.d                 |
| 2        | 40 °C        | 10% (5:1)           |
| 3        | 60 °C        | 25% (5:1)           |
| <b>4</b> | <b>70 °C</b> | <b>48% (7:3)</b>    |
| 5        | 80 °C        | 45% (7:3)           |
| 6        | 90 °C        | 43% (7:3)           |
| 7        | 100 °C       | 41% (7:3)           |
| 8        | 110 °C       | 27% (7:4)           |
| 9        | 120 °C       | n.d                 |
| 10       | 130 °C       | n.d                 |

**Table S7:** Reagent amount optimization

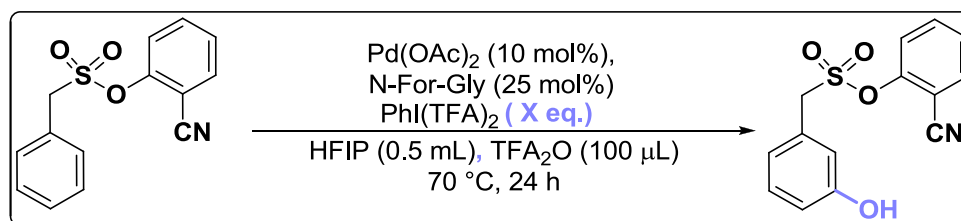

|   | Amount | Yield (meta:others) |
|---|--------|---------------------|
| 1 | 1 eq.  | 27% (3:2)           |

|          |             |                   |
|----------|-------------|-------------------|
| 2        | 1.5 eq      | 42% (4:2)         |
| 3        | 2 eq        | 48% (7:3)         |
| 4        | 2.5 eq      | 54% (7:2)         |
| 5        | 3 eq        | 58% (8:2)         |
| 6        | 3.5 eq      | 61% (10:1)        |
| <b>7</b> | <b>4 eq</b> | <b>65% (12:1)</b> |
| 8        | 4.5 eq.     | 64% (6:1)         |
| 9        | 5 eq.       | 58% (3:1)         |

**Table S8:** Effect of additive

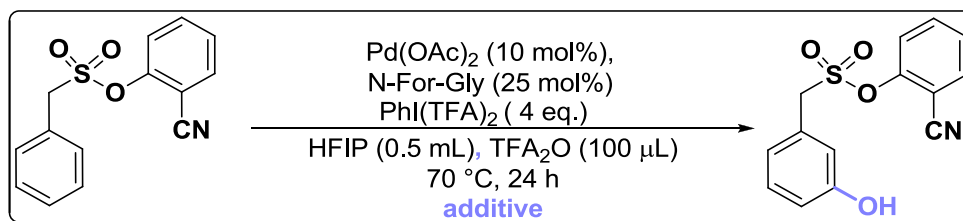

|           | Additive (2 eq)                                             | Yield (meta:others)   |
|-----------|-------------------------------------------------------------|-----------------------|
| 1         | $\text{K}_2\text{CO}_3$                                     | n.d                   |
| 2         | $\text{K}_3\text{PO}_4$                                     | n.d                   |
| 3         | $\text{NaOAc}$                                              | n.d                   |
| 4         | $\text{Cs}_2\text{CO}_3$                                    | n.d                   |
| 5         | TFA                                                         | n.d                   |
| 6         | AcOH                                                        | n.d                   |
| 7         | $\text{AgNO}_3$                                             | n.d                   |
| 8         | $\text{Ag}_2\text{CO}_3$                                    | 45% (10:1)            |
| 9         | $\text{AgOAc}$                                              | 41% (9:1)             |
| 10        | $\text{Cu(OAc)}_2$                                          | 31% (multiple pdts)   |
| 11        | BQ                                                          | n.d                   |
| 12        | $\text{K}_2\text{S}_2\text{O}_8$                            | 18% (3:1)             |
| 13        | $\text{Na}_2\text{S}_2\text{O}_8$                           | 17% (3:1)             |
| 14        | -                                                           | 65% (12:1)            |
| <b>15</b> | <b>No- (<math>\text{TFA}</math>)<math>_2\text{O}</math></b> | <b>78% (&gt;20:1)</b> |



**Table S9:** Different hydroxylating reagent: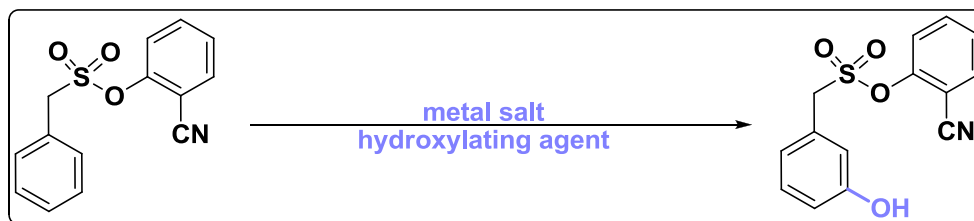

|            | Metal salt                               | -OH source                                                          | Yield (meta:others)    |
|------------|------------------------------------------|---------------------------------------------------------------------|------------------------|
| 1          | PdCl <sub>2</sub> / Pd(OAc) <sub>2</sub> | TBHP                                                                | 0                      |
| 2          | PdCl <sub>2</sub>                        | H <sub>2</sub> O <sub>2</sub>                                       | 0                      |
| 3          | PdCl <sub>2</sub>                        | NHPI                                                                | 0                      |
| 4          | Cu(OAc) <sub>2</sub>                     | (PhCO) <sub>2</sub> O, HFIP                                         | 0                      |
| 5          | PdCl <sub>2</sub> / Pd(OAc) <sub>2</sub> | TEMPO                                                               | 0                      |
| 6          | Cu(OAc) <sub>2</sub>                     | TBAI, Ag <sub>2</sub> CO <sub>3</sub> ,                             | 0                      |
| 7          | PdCl <sub>2</sub>                        | K <sub>2</sub> S <sub>2</sub> O <sub>8</sub> , CF <sub>3</sub> COOH | 0                      |
| 8          | Pd(OAc) <sub>2</sub>                     | Na <sub>2</sub> S <sub>2</sub> O <sub>8</sub> ; Dioxane             | 0                      |
| 9          | Pd(OAc) <sub>2</sub>                     | PhI(TFA) <sub>2</sub> , (CF <sub>3</sub> CO) <sub>2</sub> O         | 11 %                   |
| <b>10</b>  | <b>Pd(OAc)<sub>2</sub></b>               | <b>PhI(TFA)<sub>2</sub>, HFIP</b>                                   | <b>78 % (&gt;20:1)</b> |
| <b>11*</b> | <b>Pd(TFA)<sub>2</sub></b>               | <b>PhI(TFA)<sub>2</sub>, HFIP</b>                                   | <b>74% (&gt;20:1)</b>  |

\*Ligand is 1-(Boc-amino)cyclopentane carboxylic acid instead of For-Gly-OH.

## B. Optimization details for *meta* –acetoxylation:

**Table S10:** Various acetoxylation condition.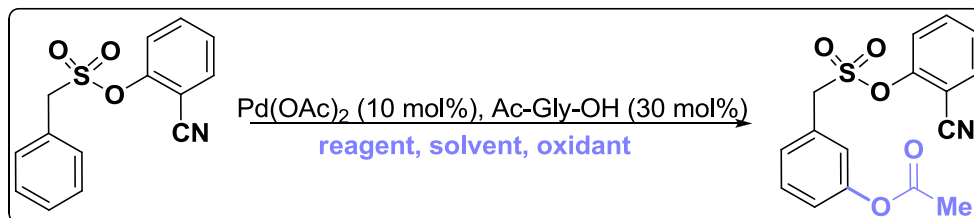

|          | Reagent                             | Solvent                                            | Oxidant                                | Product:Substrate                         |
|----------|-------------------------------------|----------------------------------------------------|----------------------------------------|-------------------------------------------|
| 1        | PhI(OAc) <sub>2</sub> (2 eq.)       | DCE : HFIP : Ac <sub>2</sub> O<br>(500:500:100) μL | --                                     | 42 % (multiple pdts) :<br>48%             |
| 2        | PhI(OAc) <sub>2</sub> (2 eq.)       | DCE: HFIP: Ac <sub>2</sub> O<br>(500:500:100) μL   | Ag <sub>2</sub> CO <sub>3</sub> (2 eq) | 35% (multiple pdts) :<br>65%              |
| <b>3</b> | <b>PhI(OAc)<sub>2</sub> (2 eq.)</b> | <b>DCE: HFIP (500:500)</b><br><b>μL</b>            | <b>--</b>                              | <b>27% (m:other =10:1):</b><br><b>71%</b> |

|    |                               |                                         |                                                      |                       |
|----|-------------------------------|-----------------------------------------|------------------------------------------------------|-----------------------|
| 4  | Ac <sub>2</sub> O (10 eq.)    | DCE: HFIP (500:500)<br>μL               | --                                                   | No product            |
| 5  | PhI(OAc) <sub>2</sub> (2 eq.) | AcOH (1mL)                              | --                                                   | No Product            |
| 6  | Ac <sub>2</sub> O (10 eq.)    | AcOH (1mL)                              | --                                                   | Undesired product (X) |
| 7  | Ac <sub>2</sub> O (10 eq.)    | AcOH (1mL)                              | Oxone (2 eq.)                                        | Undesired product (X) |
| 8  | Ac <sub>2</sub> O (10 eq.)    | AcOH (1mL)                              | K <sub>2</sub> S <sub>2</sub> O <sub>8</sub> (2 eq.) | Undesired product (X) |
| 9  | -                             | AcOH (1mL)                              | --                                                   | Undesired product (X) |
| 10 | PhI(OAc) <sub>2</sub> (2 eq.) | AcOH: CHCl <sub>3</sub> (500:500)<br>μL | --                                                   | No Product            |

**Table S11:** Variation of temperature

|          | Temperature  | Product:Substrate                    |
|----------|--------------|--------------------------------------|
| 1        | rt           | n.d                                  |
| 2        | 40 °C        | n.d                                  |
| 3        | 60 °C        | 10% ( multiple products): 85%        |
| <b>4</b> | <b>70 °C</b> | <b>36 % (multiple product): 64 %</b> |
| 5        | 80 °C        | 31 % (multiple product): 69 %        |
| 6        | 90 °C        | 36 % (multiple product): 40 %        |
| 7        | 100 °C       | 34 % (multiple product): 35 %        |
| 8        | 110 °C       | 31 % (multiple product): 40 %        |
| 9        | 120 °C       | 25 % (multiple product): 35 %        |

**Table S12:** Variation of oxidant

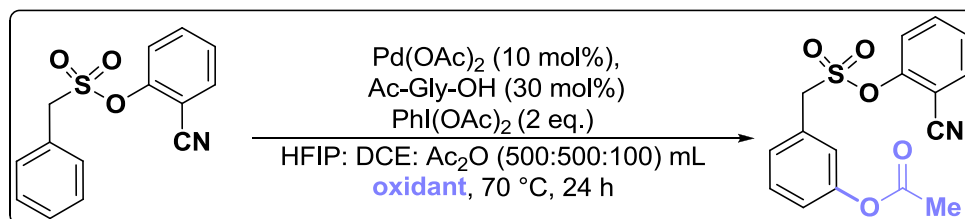

|            | Oxidant (2 eq.)                                       | Product : Substrate               |
|------------|-------------------------------------------------------|-----------------------------------|
| 1          | Ag <sub>2</sub> CO <sub>3</sub>                       | 35% (multiple product):65%        |
| 2          | AgOAc                                                 | 18% (multiple product):62%        |
| 3          | Cu(OAc) <sub>2</sub>                                  | No Product                        |
| 4          | AgNO <sub>3</sub>                                     | 18% (multiple product):62%        |
| 5          | CuBr <sub>2</sub>                                     | No Product                        |
| 6          | BQ                                                    | No Product                        |
| 7          | Oxone                                                 | 36% (multiple product):36%        |
| 8          | K <sub>2</sub> S <sub>2</sub> O <sub>8</sub>          | 23% (multiple product):31%        |
| 9          | Fe(NO <sub>3</sub> ) <sub>3</sub> · 9H <sub>2</sub> O | No Product                        |
| 10         | --                                                    | 42% (multiple product):48%        |
| <b>11*</b> | --                                                    | <b>59% (multiple product):31%</b> |

\* Solvent is HFIP:Ac<sub>2</sub>O (1 mL:100 μL)

**Table S13:** Variation of oxidants

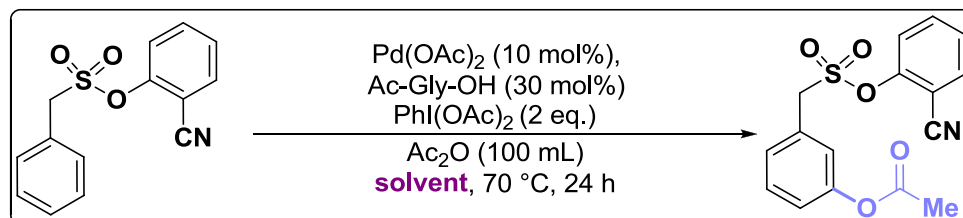

|          | Solvent (1 mL)     | Product: Substrate                |
|----------|--------------------|-----------------------------------|
| 1        | HFIP:DCE (1:1)     | 42% (multiple product):48%        |
| <b>2</b> | <b>HFIP</b>        | <b>59% (multiple product):31%</b> |
| 3        | DCE                | No Product                        |
| 4        | MeCN               | No Product                        |
| 5        | <i>t</i> -amyl -OH | No Product                        |
| 6        | Toluene            | No Product                        |
| 7        | AcOH               | Undesired product (X)             |
| 8        | DMF                | No Product                        |
| 9        | H <sub>2</sub> O   | Undesired product (X)             |

**Table S14:** Variation of reagent amount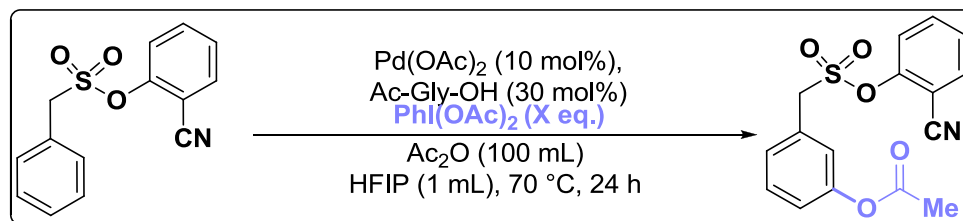

| Entry     | Amount (X eq.) | Temperature  | Product : Substrate               |
|-----------|----------------|--------------|-----------------------------------|
| 1         | 2              | 70 °C        | 59% (multiple product):31%        |
| 2         | 2.5            | 70 °C        | 54% (multiple product):40%        |
| 3         | 3              | 70 °C        | 54% (multiple product):35%        |
| 4         | 3.5            | 70 °C        | 59% (multiple product):31%        |
| <b>5</b>  | <b>4</b>       | <b>70 °C</b> | <b>63% (multiple product):27%</b> |
| 6         | 4              | 80 °C        | 54% (multiple product):20%        |
| 7         | 4              | 90 °C        | 49% (multiple product):10%        |
| 8         | 4              | 100 °C       | 48% (multiple product):5%         |
| <b>9*</b> | <b>4</b>       | <b>70 °C</b> | <b>61% (7:3):27%</b>              |

**Table S15:** Variation of Pd-salt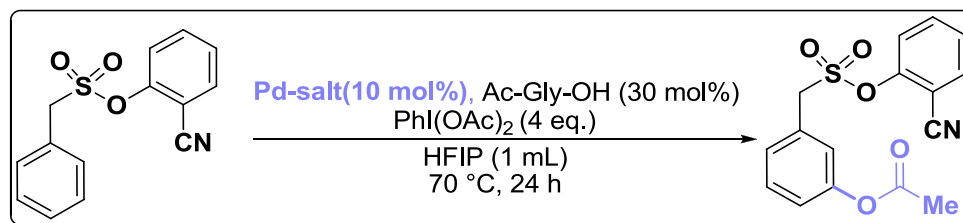

| Entry    | Pd-salt                                 | Yield ( <i>meta</i> : <i>others</i> ) |
|----------|-----------------------------------------|---------------------------------------|
| <b>1</b> | <b><math>\text{Pd(OAc)}_2</math></b>    | <b>61% (7:3)</b>                      |
| 2        | $\text{Pd(CF}_3\text{COO)}_2$           | 50% (5:1)                             |
| <b>3</b> | <b><math>\text{Pd(piv)}_2</math></b>    | <b>60% (5:2)</b>                      |
| 4        | $\text{Pd(acac)}_2$                     | 58% (4:1)                             |
| 5        | $\text{PdSO}_4$                         | No Product                            |
| 6        | $\text{Pd(PPh}_3)_2\text{Cl}_2$         | 54% (6:1)                             |
| 7        | $\text{Pd(dppf)Cl}_2$                   | No Product                            |
| 8        | $\text{PdCl}_2$                         | 54% (6:1)                             |
| 9        | $\text{Pd(CH}_3\text{CN)}_2\text{Cl}_2$ | 58%                                   |

|    |                                    |           |
|----|------------------------------------|-----------|
| 10 | $\text{Pd}_2(\text{dba})_3$        | 54% (7:1) |
| 11 | $\text{Pd}(\text{COD})\text{Cl}_2$ | 54% (6:1) |

**Table S16:** Variation of Pd-salt and ligand amount

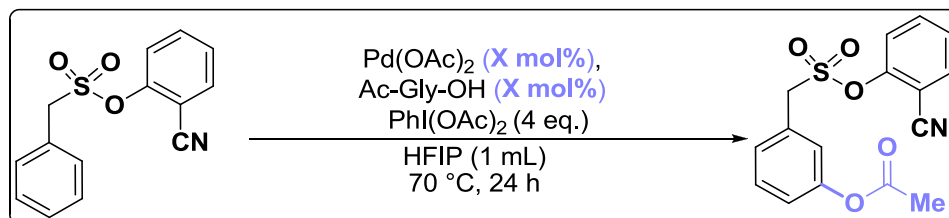

|          | $\text{Pd}(\text{OAc})_2$ | Ac-Gly-OH      | Yield (meta:others) |
|----------|---------------------------|----------------|---------------------|
| 1        | 2.5 mol%                  | 30 mol%        | 45% (2:1)           |
| 2        | 5 mol%                    | 20 mol%        | 49% (4:1)           |
| 3        | 5 mol%                    | 30 mol%        | 45% (2:1)           |
| 4        | 10 mol%                   | 10 mol%        | 55% (3:1)           |
| 5        | 10 mol%                   | 20 mol%        | 55% (5:1)           |
| 6        | 10 mol%                   | 30 mol%        | 61% (7:3)           |
| 7        | 10 mol%                   | 40 mol%        | 54% (4:1)           |
| 8        | 10 mol%                   | 50 mol%        | 35% (2:1)           |
| <b>9</b> | <b>10 mol%</b>            | <b>25 mol%</b> | <b>69% (12:1)</b>   |

**Table S17:** Variation of ligand

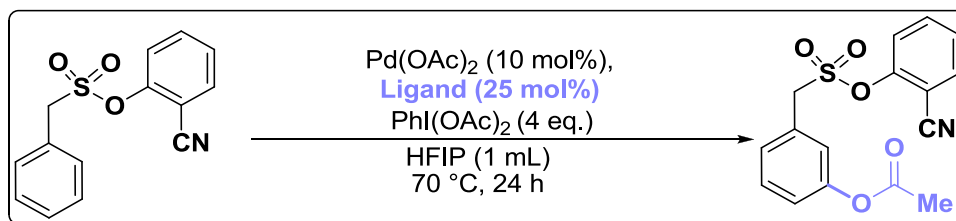

| Entry | Ligand       | Yield (meta:others) |
|-------|--------------|---------------------|
| 1     | Ac-Gly-OH    | 69% (12:1)          |
| 2     | DL-Proline   | No Product          |
| 3     | Boc-D-Valine | 54% (7:6)           |
| 4     | Ac-L-Leucine | 54% (7:6)           |
| 5     | Ac-DL-Valine | 49% (11:3)          |

|           |                          |                   |
|-----------|--------------------------|-------------------|
| 6         | Ac-L-Phenylalanine       | 61% (1:1)         |
| 7         | Boc-L-Proline            | 54% (3:1)         |
| 8         | Ac-Alanine               | 40% (9:13)        |
| 9         | Bathophen.               | No Product        |
| 10        | 1,1'-Bi(2-Naphthylamine) | No Product        |
| 11        | 4,7-dimethoxy-1,10-Phen. | No Product        |
| <b>12</b> | <b>N-Boc-Ala</b>         | <b>72% (12:1)</b> |

**Table S18:** Variation of solvent amount

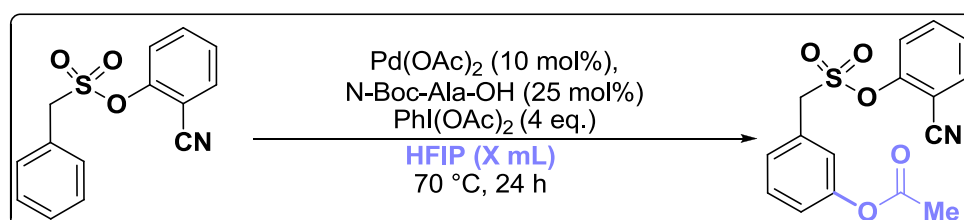

| Entry    | HFIP                      | Yield (meta:others) |
|----------|---------------------------|---------------------|
| <b>1</b> | <b>0.3</b>                | <b>75% (11:1)</b>   |
| <b>2</b> | <b>0.5</b>                | <b>76% (12:1)</b>   |
| 3        | 0.5+ DCE (100 $\mu$ L)    | 67% (7:1)           |
| 4        | 0.75                      | 70% (9:1)           |
| 5        | 1                         | 72% (12:1)          |
| 6        | 1.25                      | 63% (10:1)          |
| 7        | 1.5                       | 59% (9:1)           |
| 8        | 2                         | 35% (5:1)           |
| 9        | 3                         | 25% (3:1)           |
| 10       | 100 mL+ DCE (0.5 $\mu$ L) | 24%                 |

### III. General Procedure:

#### A. General Procedure A: Procedure for *meta*-hydroxylation

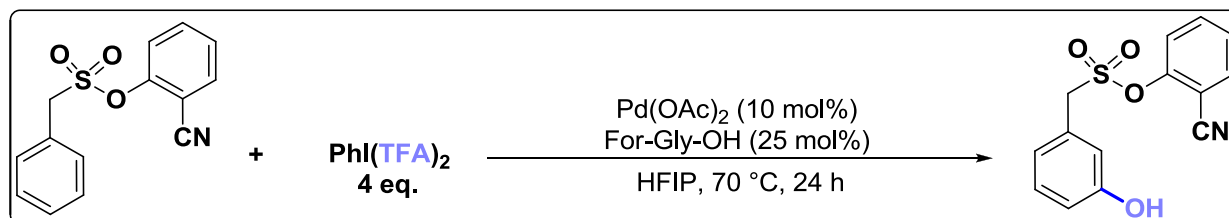

In an oven dried reaction tube, charged with magnetic stir-bar, Pd(OAc)<sub>2</sub> (10 mol%; 4.48 mg), For-Gly-OH (25 mol%; 5.15 mg) and arylmethanesulphonic ester substrate (0.2 mmol) were added. The hydroxylating agent PhI(TFA)<sub>2</sub> (0.8 mmol; 344 mg) was added to the reaction mixture followed by the HFIP (1 mL). The reaction tube was capped and stirred at room temperature for 15 mins and then placed to a preheated oil-bath at 70 °C for 24 h. Upon completion, the reaction was taken out to cool and diluted with ethyl acetate. The solution was filtered through celite bed. The filtrate was evaporated under reduced pressure and passed through the column for purification. Petroleum ether and ethyl acetate mixture was used as the eluent.

## B. General Procedure B: Procedure for *meta*-acetoxylation

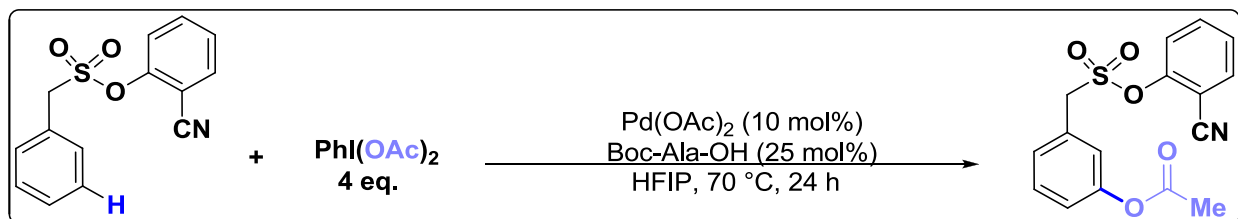

In an oven dried reaction tube, charged with magnetic stir-bar, Pd(OAc)<sub>2</sub> (10 mol%; 4.48 mg), N-Boc-Ala-OH (25 mol%; 9.45 mg) and arylmethanesulphonic ester substrate (0.2 mmol) were added. The hydroxylating agent PhI(OAc)<sub>2</sub> (0.8 mmol; 258 mg) was added to the reaction mixture followed by the HFIP (1 mL). The reaction tube was capped and stirred at room temperature for 15 mins and then placed to a preheated oil-bath at 70 °C for 24 h. Upon completion, the reaction was taken out to cool and diluted with ethyl acetate. The solution was filtered through celite bed. The filtrate was evaporated under reduced pressure and passed through the column for purification. Petroleum ether and ethyl acetate mixture was used as the eluent.

## C. General Procedure C: Procedure for sulphonate ester synthesis

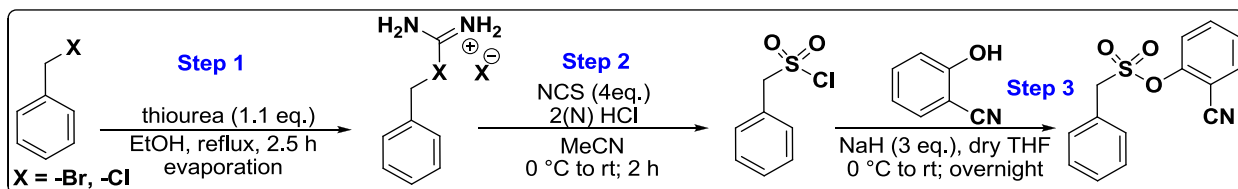

The synthesis was done following the literature procedure with few modifications.<sup>1</sup>

**Step 1:** In an oven dried 250 mL round bottomed flask the desired benzyl chloride/bromide was added along with thiourea. Absolute ethanol was added to it as solvent and refluxed for 2.5 h. Upon completion the round bottomed flask was cooled and evaporated under reduced pressure yielding white solid compound, which was directly used in the next step.

**Step 2:** N-chlorosuccinimide (4 eq.) was taken in clean round bottomed flask charged with stir-bar. 2(N) HCl was added to it along with MeCN. The reaction mixture was stirred on an ice cooled water bath. The solid salt obtained from the first step was added slowly to this reaction mixture and stirred vigorously. The addition led to an exothermic reaction. However the temperature was maintained below 25 °C. Upon forming a clear solution the mixture was warmed to the room temperature and stirred for 2 h. The reaction was evaporated under reduced

pressure to remove the acetonitrile. The remaining solution was diluted with water and extracted with ethyl acetate. The organic portion was dried over anhydrous  $\text{Na}_2\text{SO}_4$ . The solution was concentrated under reduced pressure and purified through column chromatography.

**Step 3:** In an oven dried round bottomed flask 2-hydroxybenzonitrile was dissolved in dry THF and cooled to  $0\text{ }^\circ\text{C}$  on an ice bath. NaH was added to the reaction mixture slowly until effervescence stopped. The mixture was stirred further for another 30 mins. Benzyloxymethylsulfonyl chloride, dissolved in THF, was added to the reaction mixture slowly. Upon completion of addition the reaction was taken out of the ice bath and stirred at room temperature overnight. Once completed the reaction was quenched with distilled water and extracted with ethyl acetate. The organic portion was dried over anhydrous  $\text{Na}_2\text{SO}_4$ . The solution was concentrated under reduced pressure and purified through column chromatography.

## IV. Characterization:

### A. Characterization of substrate:

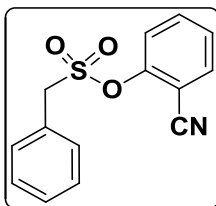

#### 2-cyanophenyl phenylmethanesulfonate:

$^1\text{H NMR}$  (400 MHz, Chloroform-*d*):  $\delta = 7.74 - 7.65$  (dd,  $J = 8.1, 1.7$  Hz, 1H),  $7.66 - 7.56$  (m, 1H),  $7.57 - 7.49$  (m, 1H),  $7.49 - 7.34$  (m, 4H),  $4.75 - 4.70$  (s, 2H).

$^{13}\text{C NMR}$  (101 MHz,  $\text{CDCl}_3$ ):  $\delta = 58.67, 76.91, 77.55, 107.43, 115.22, 123.57, 126.48, 127.48, 129.29, 129.76, 131.26, 133.97, 134.67, 150.27$ .

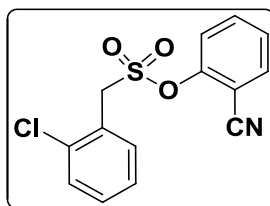

#### 2-cyanophenyl (2-chlorophenyl)methanesulfonate:

$^1\text{H NMR}$  (400 MHz, Chloroform-*d*)  $\delta 7.75 - 7.68$  (dd,  $J = 7.8, 1.7$  Hz, 1H),  $7.69 - 7.58$  (m, 2H),  $7.53 - 7.39$  (m, 2H),  $7.43 - 7.31$  (m, 3H),  $5.02 - 4.94$  (s, 2H).

$^{13}\text{C NMR}$  (101 MHz,  $\text{CDCl}_3$ )  $\delta 55.50, 76.91, 77.55, 107.57, 115.06, 123.54, 125.02, 127.59, 127.67, 130.47, 131.27, 133.25, 134.09, 134.69, 135.81, 150.02$ .

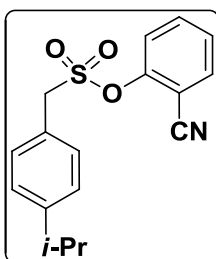



**2-cyanophenyl (4-isopropylphenyl)methanesulfonate:**

<sup>1</sup>H NMR (400 MHz, Chloroform-*d*) δ 7.71 – 7.68 (dd, *J* = 7.9, 1.7 Hz, 1H), 7.65 – 7.56 (m, 1H), 7.48 – 7.40 (m, 2H), 7.43 – 7.34 (m, 2H), 7.32 – 7.24 (m, 2H), 4.72 – 4.68 (s, 2H), 3.01 – 2.85 (hept, *J* = 7.0 Hz, 1H), 1.27 – 1.24 (d, *J* = 6.9 Hz, 6H).

<sup>13</sup>C NMR (101 MHz, CDCl<sub>3</sub>) δ 24.04, 34.14, 58.52, 76.91, 77.54, 107.46, 110.19, 115.26, 123.57, 123.64, 127.44, 131.23, 133.96, 134.63, 150.46, 150.69.

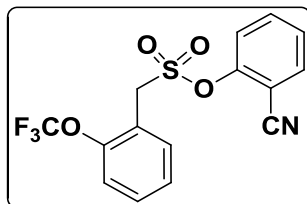

**2-cyanophenyl (2-(trifluoromethoxy)phenyl)methanesulfonate:**

<sup>1</sup>H NMR (400 MHz, Chloroform-*d*) δ 7.73 – 7.68 (ddd, *J* = 7.9, 6.2, 1.6 Hz, 2H), 7.66 – 7.60 (ddd, *J* = 8.3, 7.5, 1.7 Hz, 1H), 7.50 – 7.45 (m, 1H), 7.45 – 7.42 (m, 1H), 7.41 – 7.34 (m, 3H), 4.90 – 4.78 (s, 2H).

<sup>13</sup>C NMR (101 MHz, CDCl<sub>3</sub>) δ 52.42, 76.91, 77.55, 107.62, 114.99, 119.18, 120.17, 123.51, 127.22, 127.64, 129.67, 131.61, 132.27, 132.43, 133.38, 134.11, 134.69, 138.50, 148.54, 149.97.

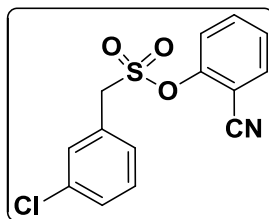

**2-cyanophenyl (3-chlorophenyl)methanesulfonate:**

<sup>1</sup>H NMR (400 MHz, Chloroform-*d*) δ 7.76 – 7.68 (dd, *J* = 7.7, 1.7 Hz, 1H), 7.68 – 7.60 (ddd, *J* = 8.4, 7.5, 1.7 Hz, 1H), 7.54 – 7.50 (t, *J* = 1.9 Hz, 1H), 7.47 – 7.34 (m, 5H), 4.75 – 4.66 (s, 2H).

<sup>13</sup>C NMR (101 MHz, CDCl<sub>3</sub>) δ 58.07, 76.91, 77.54, 107.49, 115.18, 123.66, 127.68, 128.38, 129.46, 130.07, 130.55, 131.24, 134.02, 134.75, 135.16, 150.15.

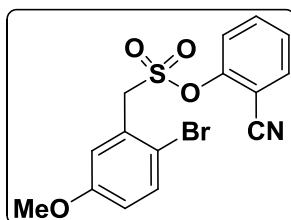

**2-cyanophenyl (2-bromo-5-methoxyphenyl)methanesulfonate:**

<sup>1</sup>H NMR (400 MHz, Chloroform-*d*) δ 7.74 – 7.67 (dd, *J* = 7.7, 1.7 Hz, 1H), 7.67 – 7.60 (ddd, *J* = 8.4, 7.5, 1.7 Hz, 1H), 7.60 – 7.53 (d, *J* = 9.0 Hz, 1H), 7.52 – 7.44 (m, 1H), 7.45 – 7.38 (td, *J* = 7.6, 1.1 Hz, 1H), 6.95 – 6.86 (d, *J* = 9.0 Hz, 1H), 5.36 – 5.26 (s, 2H), 3.93 – 3.91 (s, 3H).

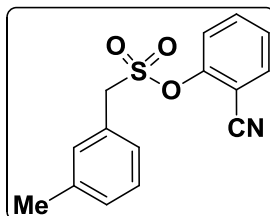

### 2-cyanophenyl m-tolylmethanesulfonate:

$^1\text{H NMR}$  (400 MHz, Chloroform-*d*)  $\delta$  7.74 – 7.66 (dd,  $J = 7.7, 1.7$  Hz, 1H), 7.65 – 7.58 (ddd,  $J = 8.6, 7.6, 1.7$  Hz, 1H), 7.47 – 7.35 (m, 2H), 7.35 – 7.28 (dd,  $J = 6.0, 2.6$  Hz, 3H), 7.26 – 7.20 (m, 1H), 4.74 – 4.60 (s, 2H), 2.43 – 2.32 (s, 3H).

$^{13}\text{C NMR}$  (101 MHz,  $\text{CDCl}_3$ )  $\delta$  21.48, 58.70, 76.91, 77.54, 107.42, 115.23, 123.56, 126.26, 127.43, 128.29, 129.15, 130.54, 131.89, 133.96, 134.66, 139.14, 150.36.

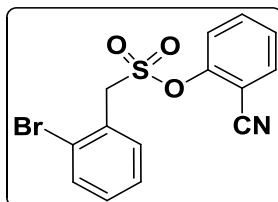

### 2-cyanophenyl (2-bromophenyl)methanesulfonate:

$^1\text{H NMR}$  (400 MHz, Chloroform-*d*)  $\delta$  7.71 – 7.68 (dd,  $J = 7.8, 1.7$  Hz, 1H), 7.68 – 7.64 (ddd,  $J = 8.0, 2.6, 1.5$  Hz, 2H), 7.64 – 7.59 (ddd,  $J = 8.4, 7.5, 1.7$  Hz, 1H), 7.45 – 7.41 (dd,  $J = 8.5, 1.0$  Hz, 1H), 7.41 – 7.36 (tt,  $J = 7.6, 1.3$  Hz, 2H), 7.31 – 7.26 (m, 1H), 5.02 – 4.96 (s, 2H).

$^{13}\text{C NMR}$  (101 MHz,  $\text{CDCl}_3$ )  $\delta$  57.92, 76.91, 77.55, 107.51, 115.02, 123.49, 126.10, 126.80, 127.57, 128.25, 131.34, 133.18, 133.76, 134.03, 134.65, 149.93.

## B. Characterization of *meta*-hydroxylated compounds:

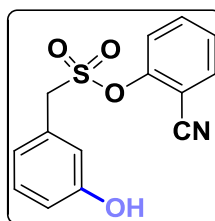

**2-cyanophenyl (3-hydroxyphenyl)methanesulfonate (1a):** The compound was synthesized following the general **procedure A** with 2-cyanophenyl phenylmethanesulfonate (0.2 mmol; 54.6 mg) as the substrate. The pure compound was purified through silica column using ethyl acetate: pet ether(10:90) mixture as the eluent. Yellow viscous liquid. Yield 74%; 43 mg.

$^1\text{H NMR}$  (400 MHz, Chloroform-*d*)  $\delta$  7.71 – 7.66 (dd,  $J = 7.7, 1.7$  Hz, 1H), 7.64 – 7.57 (ddd,  $J = 8.4, 7.6, 1.7$  Hz, 1H), 7.46 – 7.42 (dd,  $J = 8.5, 1.0$  Hz, 1H), 7.40 – 7.34 (td,  $J = 7.7, 1.1$  Hz, 1H), 7.31 – 7.22 (t,  $J = 7.8$  Hz, 1H), 7.08 – 7.00 (m, 2H), 6.94 – 6.87 (ddd,  $J = 8.2, 2.5, 1.0$  Hz, 1H), 4.68 – 4.63 (s, 2H).

$^{13}\text{C NMR}$  (101 MHz,  $\text{CDCl}_3$ )  $\delta$  58.52, 106.80, 115.37, 117.21, 118.26, 123.12, 123.34, 127.35, 127.64, 130.54, 134.06, 134.86, 150.31, 156.50.

**Dept:**  $^{13}\text{C NMR}$  (101 MHz,  $\text{CDCl}_3$ )  $\delta$  58.35, 117.03, 118.08, 122.95, 123.16, 127.18, 130.37, 133.89, 134.68.

**HRMS:** Calculated  $[\text{M}+\text{H}]^+$  for  $\text{C}_{14}\text{H}_{12}\text{NO}_4\text{S}$ : 290.0482; found: 290.0481

**IR:** 3375, 3000, 2952, 2725, 2596, 2245, 1696, 1601, 1486, 1360, 1286, 1155, 997, 775  $\text{cm}^{-1}$ .

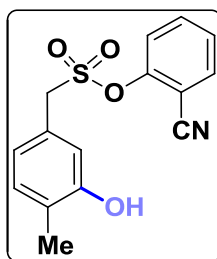

**2-cyanophenyl (3-hydroxy-4-methylphenyl)methanesulfonate (1b):** The compound was synthesized following the general **procedure A** with 2-cyanophenyl *p*-tolylmethanesulfonate (0.2 mmol; 57.4 mg ) as the substrate. The pure compound was purified through silica column using ethyl acetate: pet ether (9:91) mixture as the eluent. Colourless solid; melting point: 126-128 °C; Yield 77%; 47 mg.

**<sup>1</sup>H NMR** (400 MHz, Chloroform-*d*) δ 7.71 – 7.66 (dd, *J* = 7.7, 1.7 Hz, 1H), 7.67 – 7.57 (ddd, *J* = 8.4, 7.5, 1.7 Hz, 1H), 7.52 – 7.47 (dd, *J* = 8.5, 1.0 Hz, 1H), 7.41 – 7.33 (td, *J* = 7.7, 1.1 Hz, 1H), 7.18 – 7.13 (m, 1H), 7.05 – 7.01 (d, *J* = 1.8 Hz, 1H), 6.98 – 6.92 (dd, *J* = 7.7, 1.8 Hz, 1H), 4.66 – 4.61 (s, 2H), 2.28 – 2.21 (s, 3H).

**<sup>13</sup>C NMR** (101 MHz, CDCl<sub>3</sub>) δ 15.90, 58.57, 106.64, 115.55, 117.75, 122.95, 123.36, 124.91, 126.48, 127.15, 131.81, 134.06, 134.80, 150.56, 154.55.

**HRMS:** Calculated [M+H]<sup>+</sup> for C<sub>15</sub>H<sub>14</sub>NO<sub>4</sub>S<sup>+</sup>: 304.0638; found: 304.0640

**IR:** 3378, 3023, 2932, 2854, 2246, 1659, 1368, 1259, 1217, 1164, 1098, 870, 767 cm<sup>-1</sup>.

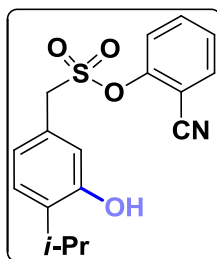

**2-cyanophenyl (3-hydroxy-4-isopropylphenyl)methanesulfonate (1c):** The compound was synthesized following the general **procedure A** with 2-cyanophenyl (4-isopropylphenyl)methanesulfonate (0.2 mmol; 63 mg ) as the substrate. The pure compound was purified through silica column using ethyl acetate: pet ether (10:90) mixture as the eluent. Colorless solid. Yield 63%; 42 mg.

**<sup>1</sup>H NMR** (400 MHz, Chloroform-*d*) δ 7.71 – 7.66 (dd, *J* = 7.7, 1.7 Hz, 1H), 7.65 – 7.57 (ddd, *J* = 8.5, 7.6, 1.7 Hz, 1H), 7.53 – 7.46 (dd, *J* = 8.4, 1.0 Hz, 1H), 7.41 – 7.32 (td, *J* = 7.7, 1.1 Hz, 1H), 7.26 – 7.18 (d, *J* = 7.7 Hz, 1H), 7.08 – 6.94 (m, 2H), 4.67 – 4.60 (s, 2H), 3.35 – 3.13 (hept, *J* = 6.9 Hz, 1H), 1.25 – 1.23 (d, *J* = 6.9 Hz, 6H).

**<sup>13</sup>C NMR** (101 MHz, CDCl<sub>3</sub>) δ 22.59, 27.17, 58.53, 106.61, 115.59, 118.11, 122.86, 123.62, 124.46, 127.12, 127.38, 134.06, 134.78, 136.91, 150.64, 153.59.

**HRMS:** Calculated [M+H]<sup>+</sup> for C<sub>17</sub>H<sub>18</sub>NO<sub>4</sub>S<sup>+</sup>: 332.0951; found: 332.0957 .

**IR:** 3522, 3012, 2942, 2857, 2254, 1642, 1451, 1373, 1263, 1161, 1030, 920, 760 cm<sup>-1</sup>.

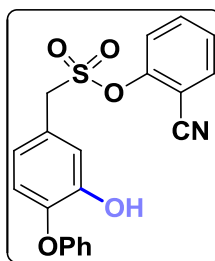

**2-cyanophenyl (3-hydroxy-4-phenoxyphenyl)methanesulfonate (1d):** The compound was synthesized following the general **procedure A** with 2-cyanophenyl (4-phenoxyphenyl)methanesulfonate (0.2 mmol; 73 mg ) as the substrate. The pure compound was purified through silica column using ethyl acetate: pet ether (15:85) mixture as the eluent. Yellow viscous liquid. Yield 62%; 47 mg.

**<sup>1</sup>H NMR** (400 MHz, Chloroform-*d*)  $\delta$  7.73 – 7.67 (dd,  $J = 7.7, 1.7$  Hz, 1H), 7.67 – 7.60 (ddd,  $J = 8.5, 7.6, 1.7$  Hz, 1H), 7.48 – 7.37 (m, 3H), 7.33 – 7.24 (m, 3H), 7.19 – 7.14 (t,  $J = 2.1$  Hz, 1H), 7.09 – 7.02 (ddd,  $J = 8.3, 2.6, 1.1$  Hz, 1H), 6.99 – 6.93 (m, 2H), 4.75 – 4.65 (s, 2H).

**<sup>13</sup>C NMR** (101 MHz, CDCl<sub>3</sub>)  $\delta$  58.29, 107.48, 115.11, 119.44, 119.86, 120.64, 121.30, 123.66, 126.24, 127.62, 128.31, 130.05, 130.72, 134.01, 134.71, 150.12, 155.36, 157.67.

**HRMS:** Calculated [M+H]<sup>+</sup> for C<sub>20</sub>H<sub>16</sub>NO<sub>5</sub>S<sup>+</sup>: 382.0749; found: 382.0749.

**IR:** 3400, 3101, 3012, 2989, 2942, 2857, 2261, 1649, 1498, 1219, 1188, 1158, 1136, 1095, 1032, 993, 959, 871, 771 cm<sup>-1</sup>.

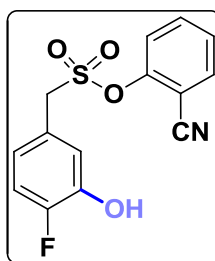

**2-cyanophenyl (4-fluoro-3-hydroxyphenyl)methanesulfonate (1e):** The compound was synthesized following the general **procedure A** with 2-cyanophenyl (4-fluorophenyl)methanesulfonate (0.2 mmol; 58.2 mg ) as the substrate. The pure compound was purified through silica column using ethyl acetate: pet ether (15:85) mixture as the eluent. Colourless solid; melting point: 147-150 °C; Yield 53%; 32.5 mg.

**<sup>1</sup>H NMR** (400 MHz, Chloroform-*d*)  $\delta$  7.75 – 7.67 (dd,  $J = 7.8, 1.7$  Hz, 1H), 7.67 – 7.60 (ddd,  $J = 9.2, 7.6, 1.7$  Hz, 1H), 7.50 – 7.45 (dd,  $J = 8.4, 1.1$  Hz, 1H), 7.43 – 7.37 (td,  $J = 7.7, 1.2$  Hz, 1H), 7.23 – 7.18 (dd,  $J = 8.1, 2.2$  Hz, 1H), 7.16 – 7.07 (dd,  $J = 10.2, 8.4$  Hz, 1H), 7.05 – 6.98 (ddd,  $J = 8.4, 4.4, 2.2$  Hz, 1H), 5.90 – 5.51 (s, 1H), 4.68 – 4.61 (s, 2H).

**<sup>13</sup>C NMR** (101 MHz, CDCl<sub>3</sub>)  $\delta$  58.10, 107.18, 115.29, 116.46, 116.65, 120.43 ( $J = 3$  Hz.), 123.19, 123.22, 123.43, 123.82 ( $J = 7$  Hz.), 127.50, 134.05, 134.79, 144.34 ( $J = 15$  Hz.), 150.29, 153.37.

**HRMS:** Calculated [M+H]<sup>+</sup> for C<sub>14</sub>H<sub>11</sub>FNO<sub>4</sub>S<sup>+</sup>: 308.0393; found: 308.0374.

**IR:** 3372, 2925, 2861, 2250, 1601, 1510, 1488, 1449, 1359, 1308, 1278, 1217, 1161, 1020, 966, 868, 770 cm<sup>-1</sup>.

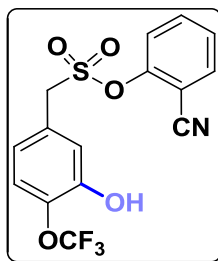

**2-cyanophenyl(3-hydroxy-4-(trifluoromethoxy)phenyl)methanesulfonate (1f):** The compound was synthesized following the general **procedure A** with 2-cyanophenyl (4-(trifluoromethoxy)phenyl)methanesulfonate (0.2 mmol; 71.4 mg ) as the substrate. The pure compound was purified through silica column using ethyl acetate: pet ether (15:85) mixture as the eluent. Colorless solid; melting point: 136-138 °C. Yield 51%; 38 mg.

**<sup>1</sup>H NMR** (400 MHz, Chloroform-*d*) δ 7.75 – 7.68 (dd, *J* = 7.7, 1.7 Hz, 1H), 7.68 – 7.61 (ddd, *J* = 8.4, 7.6, 1.7 Hz, 1H), 7.52 – 7.44 (dd, *J* = 8.5, 1.0 Hz, 1H), 7.44 – 7.36 (td, *J* = 7.7, 1.1 Hz, 1H), 7.29 – 7.26 (s, 2H), 7.16 – 7.05 (dd, *J* = 8.4, 2.2 Hz, 1H), 4.70 – 4.64 (s, 2H).

**<sup>13</sup>C NMR** (101 MHz, CDCl<sub>3</sub>) δ 58.03, 107.17, 115.30, 120.39, 120.54, 121.60, 123.34, 123.40, 123.54 (*J* = 270 Hz.), 123.70, 126.55, 134.07, 134.81, 137.71, 148.40, 150.27.

**HRMS:** Calculated [M+H]<sup>+</sup> for C<sub>15</sub>H<sub>11</sub>F<sub>3</sub>NO<sub>5</sub>S<sup>+</sup>: 374.0310; found: 374.0314.

**IR:** 3647, 2932, 2854, 2249, 1601, 1486, 1447, 1374, 1310, 1259, 1164, 1100, 1019, 973, 871, 773 cm<sup>-1</sup>.

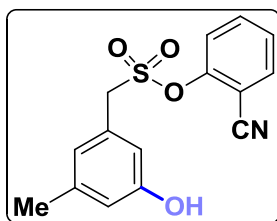

**2-cyanophenyl(3-hydroxy-5-methylphenyl)methanesulfonate (1g):** The compound was synthesized following the general **procedure A** with 2-cyanophenyl m-tolylmethanesulfonate (0.2 mmol; 57.4 mg ) as the substrate. The pure compound was purified through silica column using ethyl acetate: pet ether(9:91) mixture as the eluent. Colourless solid. Yield 75%; 45.5 mg.

**<sup>1</sup>H NMR** (400 MHz, Chloroform-*d*) δ 7.72 – 7.67 (dd, *J* = 7.7, 1.7 Hz, 1H), 7.66 – 7.59 (ddd, *J* = 8.4, 7.6, 1.8 Hz, 1H), 7.52 – 7.46 (dd, *J* = 8.4, 1.0 Hz, 1H), 7.41 – 7.34 (td, *J* = 7.7, 1.1 Hz, 1H), 6.89 – 6.83 (dd, *J* = 5.2, 3.1 Hz, 2H), 6.76 – 6.71 (d, *J* = 1.9 Hz, 1H), 4.66 – 4.59 (s, 2H), 2.35 – 2.27 (s, 3H).

**<sup>13</sup>C NMR** (101 MHz, CDCl<sub>3</sub>) δ 21.48, 29.91, 58.63, 106.79, 115.42, 115.45, 117.89, 123.06, 124.36, 127.25, 127.35, 134.06, 134.79, 140.93, 150.47, 156.29.

**HRMS:** Calculated [M+H]<sup>+</sup> for C<sub>15</sub>H<sub>14</sub>NO<sub>4</sub>S<sup>+</sup>: 304.0638; found: 304.0644

**IR:** 3344, 3023, 2932, 2854, 2243, 1169, 1368, 1259, 1217, 1164, 1098, 1029, 870, 767 cm<sup>-1</sup>.

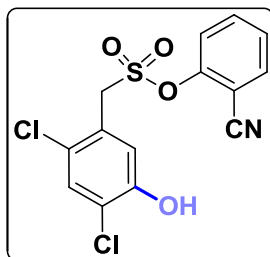

**2-cyanophenyl (2,4-dichloro-5-hydroxyphenyl)methanesulfonate (1h):** The compound was synthesized following the general **procedure A** with 2-cyanophenyl (2,4-dichlorophenyl)methanesulfonate (0.2 mmol; 68 mg ) as the substrate. The pure compound was purified through silica column using ethyl acetate: pet ether (12:88) mixture as the eluent. Yellow viscous liquid. Yield 65%; 46 mg.

**<sup>1</sup>H NMR** (400 MHz, Chloroform-*d*)  $\delta$  7.74 – 7.69 (dd,  $J = 7.7, 1.7$  Hz, 1H), 7.69 – 7.60 (ddd,  $J = 8.9, 7.6, 1.6$  Hz, 1H), 7.62 – 7.58 (d,  $J = 8.3$  Hz, 1H), 7.53 – 7.50 (d,  $J = 2.1$  Hz, 1H), 7.46 – 7.37 (td,  $J = 7.7, 1.1$  Hz, 1H), 7.39 – 7.31 (dd,  $J = 8.4, 2.1$  Hz, 1H), 4.99 – 4.87 (s, 2H).

**<sup>13</sup>C NMR** (101 MHz, CDCl<sub>3</sub>)  $\delta$  55.01, 107.56, 110.20, 115.07, 123.57, 123.73, 127.71, 128.15, 130.40, 133.94, 134.12, 134.76, 136.59, 136.85, 149.94.

**HRMS:** Calculated [M+H]<sup>+</sup> for C<sub>14</sub>H<sub>10</sub>Cl<sub>2</sub>NO<sub>4</sub>S<sup>+</sup>: 357.9702; found: 357.9708.

**IR:** 3440, 2930, 2850, 2239, 1607, 1515, 1460, 1371 1230, 1161, 1090, 988, 867, 770 cm<sup>-1</sup>.

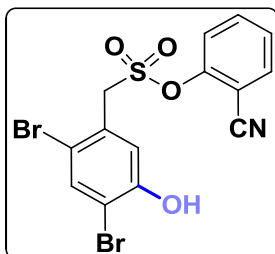

**2-cyanophenyl (2,4-dibromo-5-hydroxyphenyl)methanesulfonate (1i):** The compound was synthesized following the general **procedure A** with 2-cyanophenyl (2,4-dibromophenyl)methanesulfonate (0.2 mmol; 85.8 mg ) as the substrate. The pure compound was purified through silica column using ethyl acetate: pet ether (15:85) mixture as the eluent. Yellow solid. Yield 63%; 56.5 mg.

**<sup>1</sup>H NMR** (400 MHz, Chloroform-*d*)  $\delta$  7.74 – 7.69 (dd,  $J = 7.7, 1.7$  Hz, 1H), 7.68 – 7.63 (ddd,  $J = 8.4, 7.6, 1.7$  Hz, 1H), 7.55 – 7.50 (dd,  $J = 8.4, 1.0$  Hz, 1H), 7.50 – 7.46 (s, 1H), 7.45 – 7.39 (td,  $J = 7.7, 1.1$  Hz, 1H), 7.37 – 7.35 (s, 1H), 4.89 – 4.86 (s, 2H).

**<sup>13</sup>C NMR** (101 MHz, CDCl<sub>3</sub>)  $\delta$  55.20, 107.14, 115.26, 120.43, 122.85, 123.29, 125.01, 126.99, 127.58, 130.44, 134.17, 134.86, 150.06, 151.02.

**HRMS:** Calculated [M+H]<sup>+</sup> for C<sub>14</sub>H<sub>10</sub>Br<sub>2</sub>NO<sub>4</sub>S<sup>+</sup>: 445.8692; found: 445.8677.

**IR:** 3422, 2921, 2848, 2234, 1628, 1607, 1518, 1449, 1362, 1220, 1153, 1094, 990, 870, 770 cm<sup>-1</sup>.

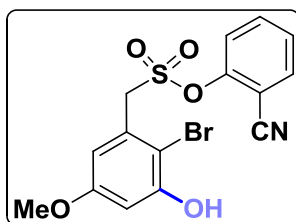

**2-cyanophenyl (2-bromo-3-hydroxy-5-methoxyphenyl)methanesulfonate (1j):** The compound was synthesized following the general **procedure A** with 2-cyanophenyl (2-bromo-5-methoxyphenyl)methanesulfonate (0.2 mmol; 76 mg ) as the substrate. The pure compound was purified through silica column using ethyl acetate: pet ether (20:80) mixture as the eluent. White solid. Yield 58%; 46 mg.

**<sup>1</sup>H NMR** (400 MHz, Chloroform-*d*)  $\delta$  7.73 – 7.68 (dd,  $J = 7.7, 1.7$  Hz, 1H), 7.66 – 7.60 (ddd,  $J = 8.4, 7.5, 1.7$  Hz, 1H), 7.57 – 7.52 (d,  $J = 8.9$  Hz, 1H), 7.51 – 7.46 (dd,  $J = 8.4, 1.0$  Hz, 1H), 7.44

– 7.37 (td,  $J = 7.7, 1.1$  Hz, 1H), 6.92 – 6.87 (d,  $J = 8.9$  Hz, 1H), 5.34 – 5.27 (s, 2H), 3.92 – 3.88 (s, 3H).

$^{13}\text{C}$  NMR (101 MHz,  $\text{CDCl}_3$ )  $\delta$  56.78, 56.86, 107.91, 114.35, 114.90, 117.21, 123.80, 126.31, 126.77, 127.68, 132.13, 134.13, 134.63, 149.74, 155.40.

**HRMS:** Calculated  $[\text{M}+\text{H}]^+$  for  $\text{C}_{15}\text{H}_{13}\text{BrNO}_5\text{S}^+$ : 397.9698; found: 397.9690.

**IR:** 3392, 2930, 2861, 2239, 1627, 1610, 1523, 1450, 1363, 1199, 1092, 993, 870, 772  $\text{cm}^{-1}$ .

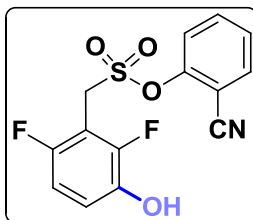

**2-cyanophenyl (2,6-difluoro-3-hydroxyphenyl)methanesulfonate (1k):** The compound was synthesized following the general **procedure A** with 2-cyanophenyl (2,6-difluorophenyl)methanesulfonate (0.2 mmol; 61.8 mg) as the substrate. The pure compound was purified through silica column using ethyl acetate: pet ether (15:85) mixture as the eluent. Yellow solid. Yield 59%; 38 mg.

$^1\text{H}$  NMR (400 MHz, Chloroform-*d*)  $\delta$  7.73 – 7.67 (dd,  $J = 7.8, 1.7$  Hz, 1H), 7.67 – 7.60 (ddd,  $J = 8.4, 7.5, 1.7$  Hz, 1H), 7.56 – 7.50 (dd,  $J = 8.5, 1.1$  Hz, 1H), 7.44 – 7.36 (td,  $J = 7.6, 1.1$  Hz, 1H), 7.13 – 7.04 (td,  $J = 9.3, 5.4$  Hz, 1H), 6.96 – 6.87 (td,  $J = 8.9, 2.0$  Hz, 1H), 4.88 – 4.84 (d,  $J = 1.1$  Hz, 2H).

$^{13}\text{C}$  NMR (101 MHz,  $\text{CDCl}_3$ )  $\delta$  46.95, 76.91, 77.55, 104.31, 104.62, 107.27, 111.69 ( $J = 4$  Hz.), 111.92 ( $J = 4$  Hz.), 114.74, 119.67 ( $J = 3$  Hz.), 119.76 ( $J = 3$  Hz.), 123.01, 127.52, 134.29, 134.75, 140.63 ( $J = 10$  Hz.), 149.91, 153.77, 153.81.

**HRMS:** Calculated  $[\text{M}+\text{H}]^+$  for  $\text{C}_{14}\text{H}_{10}\text{F}_2\text{NO}_4\text{S}^+$ : 326.0299; found: 326.0289.

**IR:** 3440, 2925, 2850, 2237, 1630, 1601, 1522, 1451, 1369 1225, 1158, 1095, 993, 871, 773  $\text{cm}^{-1}$ .

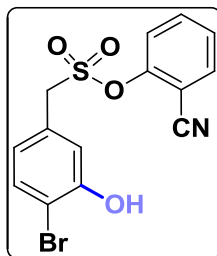

**2-cyanophenyl (4-bromo-3-hydroxyphenyl)methanesulfonate (1l):** The compound was synthesized following the general **procedure A** 2-cyanophenyl (4-bromophenyl)methanesulfonate (0.2 mmol; 70.2 mg) as the substrate. The pure compound was purified through silica column using ethyl acetate: pet ether (15:85) mixture as the eluent. Colorless Solid; melting point: 170-172  $^{\circ}\text{C}$ ; Yield 55%; 40.5 mg.

$^1\text{H}$  NMR (400 MHz, Chloroform-*d*)  $\delta$  7.74 – 7.69 (ddd,  $J = 7.7, 1.8, 0.5$  Hz, 1H), 7.68 – 7.61 (ddd,  $J = 8.4, 7.6, 1.7$  Hz, 1H), 7.55 – 7.51 (d,  $J = 8.2$  Hz, 1H), 7.49 – 7.45 (ddd,  $J = 8.4, 1.1, 0.4$  Hz, 1H), 7.44 – 7.38 (td,  $J = 7.7, 1.1$  Hz, 1H), 7.22 – 7.19 (d,  $J = 2.1$  Hz, 1H), 7.02 – 6.95 (dd,  $J = 8.2, 2.1$  Hz, 1H), 4.69 – 4.59 (s, 2H).

$^{13}\text{C}$  NMR (101 MHz,  $\text{CDCl}_3$ )  $\delta$  58.14, 107.27, 112.16, 115.30, 118.94, 123.52, 124.46, 127.58,

127.73, 133.02, 134.05, 134.80, 150.23, 153.00.

**HRMS:** Calculated  $[M+H]^+$  for  $C_{14}H_{11}BrNO_4S^+$ : 367.9592; found: 367.9588.

**IR:** 3397, 3018, 2945, 2866, 2245, 1623, 1589, 1401, 1366, 1264, 1220, 1168, 990, 873, 771, 673  $cm^{-1}$ .

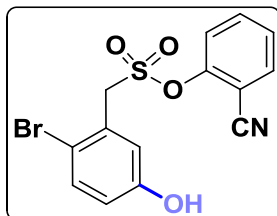

**2-cyanophenyl (2-bromo-5-hydroxyphenyl)methanesulfonate (1m):** The compound was synthesized following the general **procedure A** with 2-cyanophenyl (2-bromophenyl)methanesulfonate (0.2 mmol; 70 mg) as the substrate. The pure compound was purified through silica column using ethyl acetate: pet ether (15:85) mixture as the eluent. Yellow viscous liquid. Yield 60%; 44 mg.

**$^1H$  NMR** (500 MHz, Chloroform-*d*)  $\delta$  7.74 – 7.66 (ddd,  $J = 9.5, 7.7, 1.7$  Hz, 2H), 7.67 – 7.59 (ddt,  $J = 8.3, 7.5, 2.0$  Hz, 2H), 7.57 – 7.50 (dd,  $J = 9.3, 3.2$  Hz, 1H), 7.50 – 7.40 (m, 2H), 7.41 – 7.36 (s, 0H), 7.33 – 7.25 (dd,  $J = 8.8, 7.1$  Hz, 1H), 7.27 – 7.19 (m, 1H), 7.12 – 7.05 (dd,  $J = 8.1, 1.7$  Hz, 1H), 6.84 – 6.79 (dd,  $J = 8.8, 2.8$  Hz, 1H), 4.98 (s, 2H), 4.91 (s, 1H)

**$^{13}C$  NMR** (126 MHz,  $CDCl_3$ )  $\delta$  58.07, 58.34, 107.53, 114.33, 115.08, 115.51, 115.97, 117.69, 119.43, 120.26, 122.79, 123.60, 125.13, 127.29, 127.34, 127.39, 127.66, 129.16, 134.12, 134.17, 134.53, 134.76, 134.95, 149.98, 150.23, 153.52, 155.96.

**HRMS:** Calculated  $[M+H]^+$  for  $C_{14}H_{11}BrNO_4S^+$ : 367.9592; found: 369.9572.

**IR:** 3391, 3022, 2944, 2848, 2245, 1634, 1588, 1400, 1369, 1255, 1218, 1167, 991, 872, 771  $cm^{-1}$ .

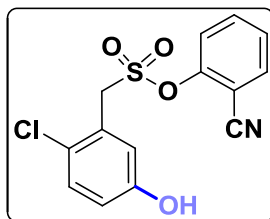

**2-cyanophenyl (2-chloro-5-hydroxyphenyl)methanesulfonate (1n):** The compound was synthesized following the general **procedure A** with 2-cyanophenyl (2-chlorophenyl)methanesulfonate (0.2 mmol; 61.4 mg) as the substrate. The pure compound was purified through silica column using ethyl acetate: pet ether (15:85) mixture as the eluent. Yellow viscous liquid. Yield 55%; 35.5 mg.

**$^1H$  NMR** (400 MHz, Chloroform-*d*)  $\delta$  7.74 – 7.67 (td,  $J = 7.5, 1.7$  Hz, 2H), 7.69 – 7.59 (m, 2H), 7.57 – 7.50 (dd,  $J = 8.5, 1.0$  Hz, 1H), 7.48 – 7.40 (m, 1H), 7.43 – 7.34 (m, 1H), 7.34 – 7.29 (d,  $J = 8.7$  Hz, 1H), 7.30 – 7.18 (m, 4H), 7.13 – 7.08 (dd,  $J = 7.8, 2.0$  Hz, 1H), 6.93 – 6.85 (dd,  $J = 8.8, 2.9$  Hz, 1H), 4.97 – 4.92 (s, 2H), 4.91 – 4.86 (s, 2H).

**$^{13}C$  NMR** (101 MHz,  $CDCl_3$ )  $\delta$  55.56, 55.78, 76.91, 77.54, 106.43, 107.47, 115.07, 115.51, 117.95, 119.10, 120.07, 121.84, 122.73, 123.54, 124.98, 125.43, 125.48, 126.63, 127.28, 127.65, 128.40, 134.12, 134.17, 134.77, 134.95, 149.96, 150.21, 152.46, 155.24.

**HRMS:** Calculated  $[M+H]^+$  for  $C_{14}H_{11}ClNO_4S^+$ : 324.0097; found: 324.0103.

**IR:** 3367, 2920, 2868, 2248, 1600, 1516, 1482, 1450, 1361, 1305, 1278, 1219, 1160, 1022, 967,



863, 766 cm<sup>-1</sup>.

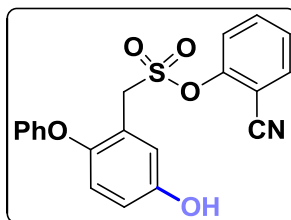

**2-cyanophenyl (5-hydroxy-2-phenoxyphenyl)methanesulfonate (10):** The compound was synthesized following the general **procedure A** with 2-cyanophenyl (2-phenoxyphenyl)methanesulfonate (0.2 mmol; 73 mg) as the substrate. The pure compound was purified through silica column using ethyl acetate: pet ether (15:85) mixture as the eluent. White solid. Yield 50%; 38 mg.

**<sup>1</sup>H NMR** (400 MHz, Chloroform-*d*)  $\delta$  8.14 – 8.08 (m, 1H), 7.73 – 7.64 (m, 1H), 7.64 – 7.58 (m, 1H), 7.57 – 7.53 (dd,  $J = 8.4, 1.0$  Hz, 1H), 7.51 – 7.45 (m, 1H), 7.44 – 7.32 (m, 2H), 7.31 – 7.26 (t,  $J = 2.1$  Hz, 1H), 7.24 – 7.20 (dt,  $J = 7.6, 1.2$  Hz, 1H), 7.09 – 7.04 (d,  $J = 2.4$  Hz, 1H), 6.96 – 6.91 (ddd,  $J = 8.3, 2.5, 1.0$  Hz, 1H), 6.91 – 6.87 (d,  $J = 8.7$  Hz, 1H), 6.87 – 6.80 (dd,  $J = 8.6, 2.4$  Hz, 1H), 4.72 – 4.67 (s, 2H).

**<sup>13</sup>C NMR** (126 MHz, CDCl<sub>3</sub>)  $\delta$  58.18, 107.00, 114.61, 117.55, 120.86, 121.31, 123.29, 125.95, 127.54, 128.69, 130.39, 130.71, 133.89, 134.31, 134.86, 141.19, 149.12, 149.85, 157.66.

**HRMS:** Calculated [M+H]<sup>+</sup> for C<sub>20</sub>H<sub>16</sub>NO<sub>5</sub>S<sup>+</sup>: 382.0749; found: 382.0756

**IR:** 3377, 3110, 3012, 2988, 2940, 2866, 2250, 1650, 1476, 1219, 1187, 1148, 1126, 1088, 993, 959, 872, 770 cm<sup>-1</sup>.

### **C. Characterization of *meta*-acetoxyated compounds:**

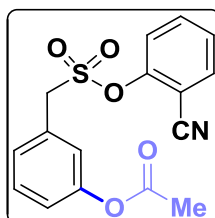

**3-((2-cyanophenoxy)sulfonyl)methyl)phenyl acetate (2a):** The compound was synthesized following the general **procedure B** 2-cyanophenyl phenylmethanesulfonate (0.2 mmol; 54.6 mg) as the substrate. The pure compound was purified through silica column using ethyl acetate: pet ether (15:85) mixture as the eluent. Pale yellow solid; melting point: 113-115 °C; Yield 71%; 47 mg.

**<sup>1</sup>H NMR** (400 MHz, Chloroform-*d*)  $\delta$  7.72 – 7.65 (dd,  $J = 7.9, 1.6$  Hz, 1H), 7.65 – 7.56 (ddd,  $J = 8.5, 7.6, 1.7$  Hz, 1H), 7.47 – 7.41 (t,  $J = 7.8$  Hz, 1H), 7.43 – 7.34 (m, 3H), 7.31 – 7.28 (t,  $J = 2.0$  Hz, 1H), 7.21 – 7.16 (m, 1H), 4.72 – 4.71 (s, 2H), 2.33 – 2.27 (d,  $J = 2.0$  Hz, 3H).

**<sup>13</sup>C NMR** (101 MHz, CDCl<sub>3</sub>)  $\delta$  21.27, 58.14, 107.43, 115.18, 123.15, 123.55, 124.46, 127.55, 127.98, 128.67, 130.28, 133.98, 134.71, 150.15, 151.15, 169.36.

**HRMS:** Calculated [M+H]<sup>+</sup> for C<sub>16</sub>H<sub>14</sub>NO<sub>5</sub>S<sup>+</sup>: 332.0593; found: 332.0591

**IR:** 3019, 2967, 2867, 2240, 1602, 1558, 1498, 1442, 1262, 1198, 1023, 997. 860, 774 cm<sup>-1</sup>.

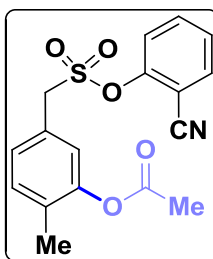

**5-((2-cyanophenoxy)sulfonyl)methyl)-2-methylphenyl acetate (2b):** The compound was synthesized following the general **procedure B** 2-cyanophenyl p-tolylmethanesulfonate (0.2 mmol; 57.4 mg ) as the substrate. The pure compound was purified through silica column using ethyl acetate: pet ether (14:86) mixture as the eluent. Colorless solid: 88-90 °C; Yield 71%; 49 mg.

**<sup>1</sup>H NMR** (500 MHz, Chloroform-*d*)  $\delta$  7.71 – 7.67 (dd,  $J$  = 8.1, 1.7 Hz, 1H), 7.65 – 7.57 (m, 1H), 7.42 – 7.35 (m, 2H), 7.33 – 7.27 (m, 2H), 7.25 – 7.20 (d,  $J$  = 1.5 Hz, 1H), 4.75 – 4.63 (s, 2H), 2.39 – 2.29 (s, 3H), 2.24 – 2.14 (s, 3H).

**<sup>13</sup>C NMR** (126 MHz, CDCl<sub>3</sub>)  $\delta$  16.31, 20.98, 58.03, 76.98, 77.48, 107.46, 115.23, 123.60, 124.79, 125.25, 127.48, 128.86, 132.01, 132.28, 133.98, 134.71, 149.78, 150.26, 169.19.

**HRMS:** Calculated [M+H]<sup>+</sup> for C<sub>17</sub>H<sub>16</sub>NO<sub>5</sub>S<sup>+</sup>: 346.0749; found: 349.0745

**IR:** 2925, 2857, 2232, 1756, 1600, 1574, 1486, 1448, 1420, 1317, 1216, 1161, 1115, 1096, 958, 868, 773 cm<sup>-1</sup>.

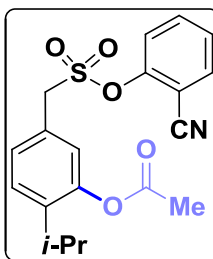

**5-((2-cyanophenoxy)sulfonyl)methyl)-2-isopropylphenyl acetate (2c):** The compound was synthesized following the general **procedure B** 2-cyanophenyl (4-isopropylphenyl)methanesulfonate (0.2 mmol; 63 mg ) as the substrate. The pure compound was purified through silica column using ethyl acetate: pet ether (12:88) mixture as the eluent. Solid. Yield 61%; 45.5 mg.

**<sup>1</sup>H NMR** (500 MHz, Chloroform-*d*)  $\delta$  7.70 – 7.66 (dd,  $J$  = 8.0, 1.7 Hz, 1H), 7.62 – 7.57 (ddd,  $J$  = 8.4, 7.6, 1.7 Hz, 1H), 7.39 – 7.34 (m, 4H), 7.21 – 7.18 (d,  $J$  = 1.3 Hz, 1H), 4.71 – 4.70 (s, 0H), 4.69 – 4.66 (s, 2H), 3.08 – 2.97 (hept,  $J$  = 6.9 Hz, 1H), 2.35 – 2.29 (s, 3H), 1.23 – 1.16 (d,  $J$  = 7.0 Hz, 6H).

**<sup>13</sup>C NMR** (101 MHz, CDCl<sub>3</sub>)  $\delta$  21.09, 22.99, 27.62, 57.98, 76.91, 77.55, 107.45, 115.20, 123.53, 124.87, 125.19, 127.44, 127.76, 129.12, 133.95, 134.66, 142.17, 148.51, 150.33, 169.61.

**HRMS:** Calculated [M+H]<sup>+</sup> for C<sub>19</sub>H<sub>20</sub>NO<sub>5</sub>S<sup>+</sup>: 374.1062; found: 374.1068.

**IR:** 3019, 2941, 2849, 2252, 1641, 1449, 1375, 1263, 1215 1161, 1041, 920, 871 765 cm<sup>-1</sup>.

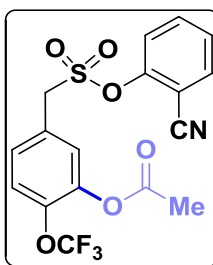

**5-((2-cyanophenoxy)sulfonyl)methyl)-2-(trifluoromethoxy)phenyl acetate (2d):** The compound was synthesized following the general **procedure B** 2-cyanophenyl (4-(trifluoromethoxy)phenyl)methanesulfonate (0.2 mmol; 71.4 mg ) as the substrate. The pure compound was purified through silica column using ethyl acetate: pet ether (25:75) mixture as the eluent. Solid. Yield 56%; 46.5 mg.

**<sup>1</sup>H NMR** (400 MHz, Chloroform-*d*)  $\delta$  7.72 – 7.67 (dd,  $J$  = 8.0, 1.7 Hz, 1H), 7.66 – 7.59 (td,  $J$  = 7.8, 1.8 Hz, 1H), 7.48 – 7.42 (m, 2H), 7.42 – 7.35 (m, 3H), 4.76 – 4.68 (s, 2H), 2.41 – 2.25 (s, 3H).

**<sup>13</sup>C NMR** (101 MHz, CDCl<sub>3</sub>)  $\delta$  20.64, 57.56, 107.36, 115.20, 120.39, 122.87, 123.17 ( $J$  = 267 Hz.), 123.29, 126.37, 127.68, 129.78, 134.02, 134.79, 141.98, 143.03, 150.08, 168.33.

**HRMS:** Calculated [M+Na]<sup>+</sup> for C<sub>17</sub>H<sub>12</sub>F<sub>3</sub>NNaO<sub>6</sub>S<sup>+</sup>: 438.0235; found: 438.0236.

**IR:** 3010, 2931, 2854, 2247, 1610, 1488, 1442, 1371, 1310, 1262, 1166, 1105, 1018, 970, 872, 770 cm<sup>-1</sup>.

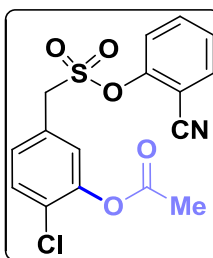

**2-chloro-5-((2-cyanophenoxy)sulfonyl)methyl)phenyl acetate (2e):** The compound was synthesized following the general **procedure B** 2-cyanophenyl (4-chlorophenyl)methanesulfonate (0.2 mmol; 51.4 mg ) as the substrate. The pure compound was purified through silica column using ethyl acetate: pet ether (17:83) mixture as the eluent. Solid. Yield 55%; 40 mg.

**<sup>1</sup>H NMR** (400 MHz, Chloroform-*d*)  $\delta$  7.73 – 7.66 (m, 1H), 7.68 – 7.58 (m, 1H), 7.54 – 7.47 (m, 1H), 7.44 – 7.33 (m, 4H), 4.74 – 4.65 (s, 2H), 2.41 – 2.32 (s, 3H).

**<sup>13</sup>C NMR** (101 MHz, CDCl<sub>3</sub>)  $\delta$  20.79, 57.69, 107.40, 110.19, 115.22, 123.57, 126.57, 127.65, 128.99, 129.77, 131.15, 134.01, 134.78, 147.58, 150.10, 168.39.

**HRMS:** Calculated [M+H]<sup>+</sup> for C<sub>16</sub>H<sub>13</sub>ClNO<sub>5</sub>S<sup>+</sup>: 366.0203; found: 366.0210

**IR:** 2928, 2854, 2237, 1607, 1486, 1449, 1367, 1293, 1219, 1161, 1095, 869, 771 cm<sup>-1</sup>.

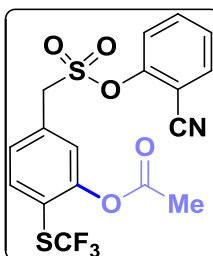

**5-((2-cyanophenoxy)sulfonyl)methyl)-2-(trifluoromethylthio)phenyl acetate (2f):** The compound was synthesized following the general **procedure B** 2-cyanophenyl (4-(trifluoromethylthio)phenyl)methanesulfonate (0.2 mmol; 74.6 mg ) as the substrate. The pure compound was purified through silica column using ethyl acetate: pet ether (22:78) mixture as the eluent. Solid. Yield 52%; 45 mg.

**<sup>1</sup>H NMR** (500 MHz, Chloroform-*d*)  $\delta$  7.81 – 7.77 (d, *J* = 8.0 Hz, 1H), 7.72 – 7.67 (dd, *J* = 7.7, 1.7 Hz, 1H), 7.66 – 7.59 (m, 1H), 7.50 – 7.46 (dd, *J* = 8.1, 2.0 Hz, 1H), 7.47 – 7.43 (d, *J* = 2.0 Hz, 1H), 7.44 – 7.35 (m, 2H), 4.78 – 4.69 (s, 2H), 2.40 – 2.31 (s, 3H).

**<sup>13</sup>C NMR** (126 MHz, CDCl<sub>3</sub>)  $\delta$  20.91, 57.76, 107.38, 115.21, 122.92 (*J* = 252 Hz.), 126.44, 127.74, 127.89, 129.57, 131.69, 134.03, 134.81, 138.73, 139.39, 150.06, 153.03, 168.89.

**<sup>19</sup>F NMR** (471 MHz, Chloroform-*d*)  $\delta$  -41.46 – -41.59

**HRMS:** Calculated [M+Na]<sup>+</sup> for C<sub>17</sub>H<sub>12</sub>F<sub>3</sub>NNaO<sub>5</sub>S<sub>2</sub><sup>+</sup>: 454.0007; found: 453.9997

**IR:** 2926, 2856, 2239, 1605, 1487, 1440, 1372, 1278, 1221, 1155, 1095, 970, 861, 767 cm<sup>-1</sup>.

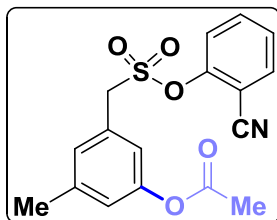

**3-((2-cyanophenoxy)sulfonyl)methyl)-5-methylphenyl acetate (2g):** The compound was synthesized following the general **procedure B** 2-cyanophenyl m-tolylmethanesulfonate (0.2 mmol; 57.4 mg ) as the substrate. The pure compound was purified through silica column using ethyl acetate: pet ether (13:87) mixture as the eluent. Solid. Yield 71%; 49 mg.

**<sup>1</sup>H NMR** (500 MHz, Chloroform-*d*)  $\delta$  7.72 – 7.65 (dt, *J* = 7.7, 1.4 Hz, 1H), 7.65 – 7.57 (m, 1H), 7.43 – 7.34 (m, 2H), 7.23 – 7.16 (s, 1H), 7.13 – 7.06 (d, *J* = 2.0 Hz, 1H), 7.01 – 6.91 (d, *J* = 2.0 Hz, 1H), 4.70 – 4.64 (s, 2H), 2.41 – 2.33 (s, 3H), 2.31 – 2.26 (s, 3H).

**<sup>13</sup>C NMR** (126 MHz, CDCl<sub>3</sub>)  $\delta$  21.25, 21.39, 58.15, 107.38, 115.17, 121.46, 123.50, 123.77, 127.49, 129.46, 133.95, 134.68, 140.72, 150.20, 151.04, 169.47.

**HRMS:** Calculated [M+H]<sup>+</sup> for C<sub>17</sub>H<sub>16</sub>NO<sub>5</sub>S<sup>+</sup>: 346.0749; found: 349.0748.

**IR:** 2935, 2858, 2236, 1758, 1605, 1576, 1510, 1478, 1445, 1423, 1317, 1272, 1115, 1016, 958, 868, 773, cm<sup>-1</sup>.

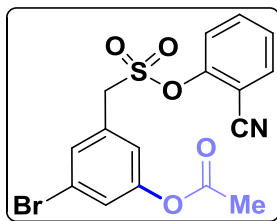

**3-bromo-5-((2-cyanophenoxy)sulfonyl)methylphenyl acetate (2h):** The compound was synthesized following the general **procedure B** 2-cyanophenyl (3-bromophenyl)methanesulfonate (0.2 mmol; 71.4 mg ) as the substrate. The pure compound was purified through silica column using ethyl acetate: pet ether (15:85) mixture as the eluent. Solid. Yield 55%; 45 mg.

**<sup>1</sup>H NMR** (500 MHz, Chloroform-*d*)  $\delta$  7.73 – 7.68 (dd, *J* = 7.7, 1.7 Hz, 1H), 7.66 – 7.60 (ddd, *J* = 8.4, 7.6, 1.7 Hz, 1H), 7.56 – 7.51 (t, *J* = 1.7 Hz, 1H), 7.45 – 7.38 (m, 2H), 7.38 – 7.35 (t, *J* = 1.9 Hz, 1H), 7.31 – 7.25 (t, *J* = 1.8 Hz, 1H), 4.69 (s), 4.67 (s, 2H), 2.36 (s), 2.30 (s, 3H).

$^{13}\text{C}$  NMR (126 MHz,  $\text{CDCl}_3$ )  $\delta$  21.19, 57.57, 107.46, 115.16, 123.05, 123.46, 123.61, 126.60, 127.73, 129.46, 131.50, 134.03, 134.78, 150.05, 151.53, 168.89.

**HRMS:** Calculated  $[\text{M}+\text{H}]^+$  for  $\text{C}_{16}\text{H}_{13}\text{BrNO}_5\text{S}^+$ : 409.9698; found: 409.9695.

**IR:** 3017, 2931, 2819, 1740, 1602, 1450, 1267, 1221, 1167, 990, 872, 772, 672  $\text{cm}^{-1}$ .

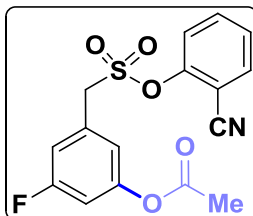

**3-((2-cyanophenoxy)sulfonyl)methyl)-5-fluorophenyl acetate (2i):** The compound was synthesized following the general **procedure B** 2-cyanophenyl (3-fluorophenyl)methanesulfonate (0.2 mmol; 58.2 mg) as the substrate. The pure compound was purified through silica column using ethyl acetate: pet ether (12:88) mixture as the eluent. Solid. Yield 54%; 38 mg.

$^1\text{H}$  NMR (500 MHz, Chloroform-*d*)  $\delta$  7.73 – 7.67 (dd,  $J = 7.7, 1.8$  Hz, 1H), 7.67 – 7.60 (ddd,  $J = 8.3, 7.5, 1.7$  Hz, 1H), 7.46 – 7.37 (m, 2H), 7.18 – 7.09 (m, 2H), 7.00 – 6.94 (dt,  $J = 9.0, 2.2$  Hz, 1H), 4.69 (s, 2H), 4.62 (s), 2.34 (s), 2.30 (s, 3H)

$^{13}\text{C}$  NMR (126 MHz,  $\text{CDCl}_3$ )  $\delta$  20.70, 21.24, 57.72, 57.80, 76.98, 77.48, 100.17, 107.46, 111.23, 111.43, 115.17, 115.72, 115.90, 119.57, 119.73, 120.46, 123.10, 123.63, 124.69, 127.43, 127.74, 129.23, 134.04, 134.80, 150.01, 151.90, 151.99, 161.95, 163.93, 168.93.

**HRMS:** Calculated  $[\text{M}+\text{H}]^+$  for  $\text{C}_{16}\text{H}_{13}\text{FNO}_5\text{S}^+$ : 350.0498; found: 350.0495.

**IR:** 3045, 2930, 2821, 1743, 1608, 1461, 1432, 1278, 1231, 1166, 987, 872, 765, 671  $\text{cm}^{-1}$ .

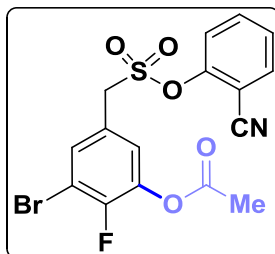

**3-bromo-5-((2-cyanophenoxy)sulfonyl)methyl)-2-fluorophenyl acetate (2j):** The compound was synthesized following the general **procedure B** 2-cyanophenyl (3-bromo-4-fluorophenyl)methanesulfonate (0.2 mmol; 73.8 mg) as the substrate. The pure compound was purified through silica column using ethyl acetate: pet ether (21:79) mixture as the eluent. Solid. Yield 57%; 49 mg.

$^1\text{H}$  NMR (500 MHz, Chloroform-*d*)  $\delta$  7.74 – 7.69 (dd,  $J = 7.7, 1.6$  Hz, 1H), 7.68 – 7.62 (ddd,  $J = 8.4, 7.6, 1.7$  Hz, 1H), 7.62 – 7.58 (dd,  $J = 5.5, 2.2$  Hz, 1H), 7.47 – 7.38 (m, 2H), 7.35 – 7.31 (dd,  $J = 6.3, 2.2$  Hz, 1H), 4.71 – 4.61 (s, 2H), 2.39 – 2.29 (s, 3H).

$^{13}\text{C}$  NMR (126 MHz,  $\text{CDCl}_3$ )  $\delta$  20.64, 57.14, 107.39, 110.94 ( $J = 18$  Hz.), 115.21, 123.62, 123.89 ( $J = 5$  Hz.), 126.01, 127.80, 133.28, 134.04, 134.85, 139.27 ( $J = 15$  Hz.), 150.00, 151.51, 153.52, 167.93.

**HRMS:** Calculated  $[\text{M}+\text{H}]^+$  for  $\text{C}_{16}\text{H}_{12}\text{BrFNO}_5\text{S}^+$ : 427.9604; found: 427.9610.

**IR:** 3001, 2928, 2861, 2241, 1604, 1480, 1438, 1372, 1305, 1268, 1168, 1121, 989, 869, 774  $\text{cm}^{-1}$ .

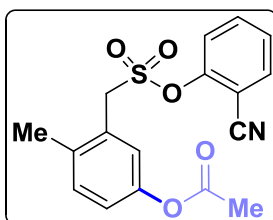

**3-((2-cyanophenoxy)sulfonyl)methyl)-4-methylphenyl acetate (2k):** The compound was synthesized following the general **procedure B** 2-cyanophenyl o-tolylmethanesulfonate (0.2 mmol; 57.4 mg ) as the substrate. The pure compound was purified through silica column using ethyl acetate: pet ether (12:88) mixture as the eluent. Pale yellow solid; melting point: 133-135 °C; Yield 75%; 52 mg.

**<sup>1</sup>H NMR** (500 MHz, Chloroform-*d*):  $\delta$  = 7.74 – 7.68 (dd,  $J$  = 7.8, 1.8 Hz, 1H), 7.66 – 7.58 (m, 1H), 7.44 – 7.37 (m, 2H), 7.31 – 7.23 (m, 2H), 7.09 – 7.05 (dd,  $J$  = 8.3, 2.5 Hz, 1H), 4.77 (s, 2H), 4.82 (s), 2.49 – 2.45 (s, 3H), 2.29 – 2.27 (s, 3H).

**<sup>13</sup>C NMR** (126 MHz, CDCl<sub>3</sub>):  $\delta$  = 19.37, 21.27, 55.80, 107.62, 115.19, 123.23, 123.72, 125.24, 126.10, 127.60, 132.18, 134.01, 134.74, 136.41, 149.12, 150.06, 169.62.

**HRMS:** Calculated [M+H]<sup>+</sup> for C<sub>17</sub>H<sub>16</sub>NO<sub>5</sub>S<sup>+</sup>: 346.0749; found: 349.0744.

**IR:** 2930, 2856, 2234, 1751, 1612, 1575, 1488, 1452, 1412, 1311, 1210, 1112, 1088, 954, 859, 770 cm<sup>-1</sup>.

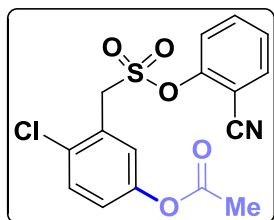

**4-chloro-3-((2-cyanophenoxy)sulfonyl)methyl)phenyl acetate (2l):** The compound was synthesized following the general **procedure B** 2-cyanophenyl (2-chlorophenyl)methanesulfonate (0.2 mmol; 61.4 mg ) as the substrate. The pure compound was purified through silica column using ethyl acetate: pet ether (18:82) mixture as the eluent. Solid. Yield: 63%; 46 mg.

**<sup>1</sup>H NMR** (500 MHz, Chloroform-*d*)  $\delta$  7.73 – 7.68 (dd,  $J$  = 7.8, 1.7 Hz, 1H), 7.66 – 7.59 (ddd,  $J$  = 8.4, 7.6, 1.7 Hz, 1H), 7.51 – 7.46 (d,  $J$  = 8.7 Hz, 1H), 7.47 – 7.41 (m, 2H), 7.43 – 7.36 (td,  $J$  = 7.6, 1.1 Hz, 1H), 7.18 – 7.13 (dd,  $J$  = 8.7, 2.7 Hz, 1H). 4.99(s), 4.94(s, 2H), 2.36 (s), 2.30 (s, 3H).

**<sup>13</sup>C NMR** (126 MHz, CDCl<sub>3</sub>)  $\delta$  21.21, 55.27, 107.55, 115.02, 123.49, 123.55, 124.69, 125.35, 126.15, 126.23, 127.63, 127.93, 130.56, 131.16, 132.66, 134.08, 134.10, 134.71, 149.58, 149.90, 169.13.

**HRMS:** Calculated [M+Na]<sup>+</sup> for C<sub>16</sub>H<sub>12</sub>ClNaO<sub>5</sub>S<sup>+</sup>: 388.0022; found: 388.0028.

**IR:** 2941, 2852, 2237, 1606, 1481, 1454, 1364, 1297, 1218, 1160, 1092, 869, 771 cm<sup>-1</sup>.

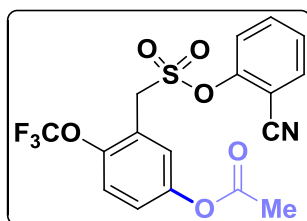

**3-((2-cyanophenoxy)sulfonyl)methyl)-4-(trifluoromethoxy)phenyl acetate (2m):** The

compound was synthesized following the general **procedure B** 2-cyanophenyl (2-(trifluoromethoxy)phenyl)methanesulfonate (0.2 mmol; 71.4 mg ) as the substrate. The pure compound was purified through silica column using ethyl acetate: pet ether (25:75) mixture as the eluent. Solid. Yield 57%; 47.5 mg.

**<sup>1</sup>H NMR** (500 MHz, Chloroform-*d*)  $\delta$  7.73 – 7.68 (dd,  $J$  = 7.8, 1.7 Hz, 1H), 7.66 – 7.62 (m, 1H), 7.49 – 7.46 (d,  $J$  = 2.8 Hz, 1H), 7.46 – 7.43 (dd,  $J$  = 8.5, 1.0 Hz, 1H), 7.43 – 7.35 (m, 2H), 7.25 – 7.22 (dd,  $J$  = 9.0, 2.8 Hz, 1H), 4.86 – 4.79 (s, 2H), 2.32 – 2.29 (s, 3H).

**<sup>13</sup>C NMR** (126 MHz, CDCl<sub>3</sub>)  $\delta$  21.20, 52.11, 107.61, 114.94, 120.62, 122.78, 124.50 ( $J$  = 271 Hz.), 126.23, 129.82, 132.66, 134.12, 134.71, 139.11, 145.74, 148.79, 149.83, 169.12.

**HRMS**: Calculated [M+Na]<sup>+</sup> for C<sub>17</sub>H<sub>12</sub>F<sub>3</sub>NNaO<sub>6</sub>S<sup>+</sup>: 438.0235; found: 438.0240.

**IR**: 2943, 2850, 2242, 1605, 1478, 1448, 1375, 1301, 1266, 1155, 1100, 1014, 970, 877, 778 cm<sup>-1</sup>.

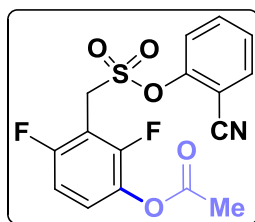

**3-((2-cyanophenoxy)sulfonyl)methyl)-2,4-difluorophenyl acetate (2n)**: The compound was synthesized following the general **procedure B** 2-cyanophenyl (2,6-difluorophenyl)methanesulfonate (0.2 mmol; 61.8 mg ) as the substrate. The pure compound was purified through silica column using ethyl acetate: pet ether (15:85) mixture as the eluent. liquid. Yield 51%; 37.5 mg.

**<sup>1</sup>H NMR** (400 MHz, Chloroform-*d*):  $\delta$  = 7.72 – 7.68 (dd,  $J$  = 7.7, 1.8 Hz, 1H), 7.66 – 7.60 (ddd,  $J$  = 8.5, 7.5, 1.7 Hz, 1H), 7.49 – 7.44 (dd,  $J$  = 8.5, 1.0 Hz, 1H), 7.44 – 7.37 (td,  $J$  = 7.7, 1.1 Hz, 1H), 7.29 – 7.19 (td,  $J$  = 8.8, 5.5 Hz, 1H), 7.06 – 6.99 (td,  $J$  = 8.8, 2.0 Hz, 1H), 4.87(s, 2H), 4.86 (s) 2.37 – 2.29 (s, 3H).

**<sup>13</sup>C NMR** (101 MHz, CDCl<sub>3</sub>):  $\delta$  = 20.60, 22.90, 29.90, 46.69, 107.90, 111.70, 111.92, 114.70, 123.03, 123.56, 125.92, 125.95, 125.97, 126.05, 126.08, 127.79, 134.20, 134.71, 149.63, 152.06, 168.34.

**HRMS**: Calculated [M+H]<sup>+</sup> for C<sub>16</sub>H<sub>12</sub>F<sub>2</sub>NO<sub>5</sub>S<sup>+</sup>: 368.0404; found: 368.0406

**IR**: 2929, 2848, 2235, 1625, 1602, 1525, 1450, 1363 1220, 1153, 1091, 990, 872, 768 cm<sup>-1</sup>.

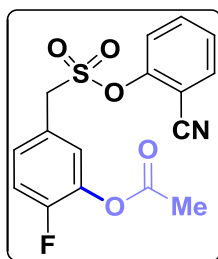

**5-((2-cyanophenoxy)sulfonyl)methyl)-2-fluorophenyl acetate (2o)**: The compound was synthesized following the general **procedure B** 2-cyanophenyl (4-fluorophenyl)methanesulfonate (0.2 mmol; 58.2 mg ) as the substrate. The pure compound was purified through silica column using ethyl acetate: pet ether (12:88) mixture as the eluent. Solid; melting point:100-102 °C; Yield 55%; 38.5 mg.

**<sup>1</sup>H NMR** (400 MHz, Chloroform-*d*)  $\delta$  7.72 – 7.67 (dd,  $J$  = 8.0, 1.7 Hz, 1H), 7.67 – 7.58 (m, 1H),

7.43 – 7.40 (t,  $J = 0.9$  Hz, 1H), 7.41 – 7.38 (dd,  $J = 2.1, 1.1$  Hz, 1H), 7.38 – 7.34 (m, 2H), 7.25 – 7.18 (dd,  $J = 9.7, 8.4$  Hz, 1H), 4.71 – 4.65 (s, 2H), 2.37 – 2.30 (s, 3H).

$^{13}\text{C}$  NMR (101 MHz,  $\text{CDCl}_3$ )  $\delta$  20.64, 57.60, 107.37, 115.21, 117.65 ( $J = 19$  Hz.), 123.14, 123.18, 123.53, 126.80, 126.82, 127.62, 130.03 ( $J = 8$  Hz.), 134.00, 134.77, 138.65 ( $J = 13$  Hz.), 150.11, 153.86, 156.37, 168.21.

**HRMS:** Calculated  $[\text{M}+\text{H}]^+$  for  $\text{C}_{16}\text{H}_{13}\text{FNO}_5\text{S}^+$ : 350.0498; found: 350.0497.

**IR:** 2945, 2856, 2238, 1611, 1491, 1459, 1368, 1291, 1211, 1145, 1088, 859, 768  $\text{cm}^{-1}$ .

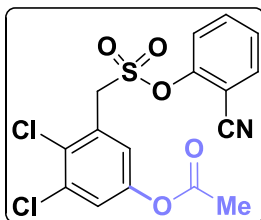

**3,4-dichloro-5-((2-cyanophenoxy)sulfonyl)methyl)phenyl acetate (2p):** The compound was synthesized following the general procedure B 2-cyanophenyl (2,3-dichlorophenyl)methanesulfonate (0.2 mmol; 68.2 mg) as the substrate. The pure compound was purified through silica column using ethyl acetate: pet ether (20:80) mixture as the eluent. Solid. Yield: 50%; 40 mg.

$^1\text{H}$  NMR (500 MHz, Chloroform- $d$ )  $\delta$  7.73 – 7.68 (dd,  $J = 7.7, 1.7$  Hz, 1H), 7.67 – 7.61 (ddd,  $J = 8.5, 7.6, 1.7$  Hz, 1H), 7.51 – 7.44 (dd,  $J = 8.5, 1.0$  Hz, 1H), 7.44 – 7.36 (m, 3H), 5.01 – 5.00 (s, 0H), 5.01 – 4.96 (s, 2H), 2.36 – 2.25 (s, 3H).

$^{13}\text{C}$  NMR (126 MHz,  $\text{CDCl}_3$ )  $\delta$  21.17, 55.88, 107.47, 115.01, 123.48, 124.77, 125.57, 127.76, 131.42, 131.46, 134.12, 134.70, 134.78, 149.04, 149.70, 168.78.

**HRMS:** Calculated  $[\text{M}+\text{H}]^+$  for  $\text{C}_{16}\text{H}_{12}\text{Cl}_2\text{NO}_5\text{S}^+$ : 399.9813; found: 399.9818

**IR:** 2939, 2841, 2236, 1618, 1600, 1527, 1455, 1360 1228, 1167, 1088, 991, 872, 770  $\text{cm}^{-1}$ .

## V. Mechanistic Study:

### A. Identification of intermediate (hydroxylation):

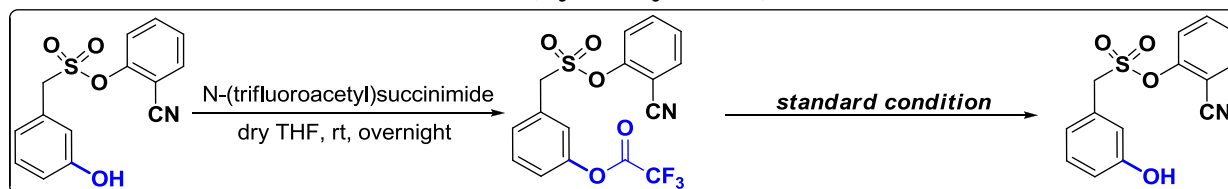

In order to confirm the intermediacy of the *meta*-trifluoroacetoxy moiety, the compound was synthesized separately and administrated under the optimized condition of *meta*-hydroxylation.

**Synthesis of meta-trifluoroacetoxy moiety [3-((2-cyanophenoxy)sulfonyl)methyl)phenyl 2,2,2-trifluoroacetate]:** The meta-hydroxylated compound (**1a**) (0.5 mmol; 145 mg) was dissolved in dry THF (3mL) and N-(trifluoroacetyl)succinimide<sup>2</sup> (0.8 mmol; 156 mg) was added to it. The reaction was refluxed overnight under  $\text{N}_2$  atmosphere. After the reaction was finished, the precipitated succinimide was filtered off, and solvent was evaporated under reduced pressure forming the trifluoroacetate esters. The crude product was dissolved in diethylether (3 X 5 mL) and filtered to remove the succinimide. The organic part was evaporated to obtain the pure product (yield **92%**).

The obtained solid compound was directly used under optimized condition (general



procedure A). Both in presence and absence of  $\text{PhI}(\text{TFA})_2$  meta-hydroxylated compound was obtained in quantitative yield.

## B. Determination of order and KIE:

The order of the reaction with respect to the palladium and  $\text{PhI}(\text{TFA})_2$  was determined using Initial slope method. Multiple sets of standard reaction were performed with the variation of the palladium and  $\text{PhI}(\text{TFA})_2$  loading keeping other parameters intact (Table S19).

**Table S19.** Different sets of reaction

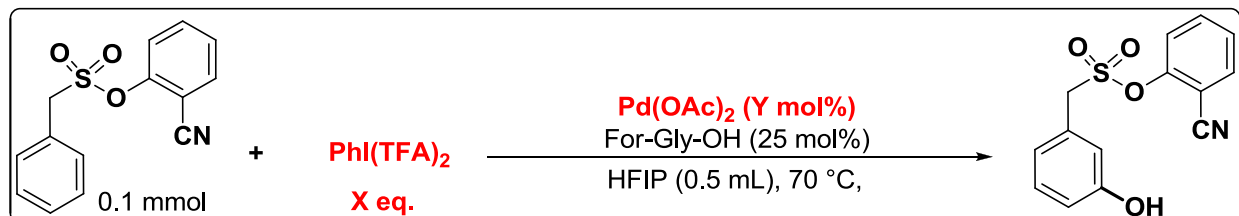

|              | Substrate                     | $\text{Pd}(\text{OAc})_2$ | N-For-Gly-OH      | $\text{PhI}(\text{TFA})_2$ | HFIP   |
|--------------|-------------------------------|---------------------------|-------------------|----------------------------|--------|
| <b>Run 1</b> | 0.1 mmol                      | 10 mol% = 0.02(M)         | 25 mol% = 0.05(M) | 0.4 mmol                   | 0.5 mL |
| <b>Run 2</b> | 0.1 mmol                      | <b>15 mol% = 0.03(M)</b>  | 25 mol% = 0.05(M) | 0.4 mmol                   | 0.5 mL |
| <b>Run 3</b> | 0.1 mmol                      | 10 mol% = 0.02(M)         | 25 mol% = 0.05(M) | <b>0.2 mmol</b>            | 0.5 mL |
| <b>Run 4</b> | 0.1 mmol                      | 10 mol% = 0.02(M)         | 25 mol% = 0.05(M) | <b>0.3 mmol</b>            | 0.5 mL |
| <b>Run 5</b> | <b>0.15 mmol</b>              | 10 mol% = 0.02(M)         | 25 mol% = 0.05(M) | 0.4 mmol                   | 0.5 mL |
| <b>Run 6</b> | <b>0.1 mmol-d<sub>5</sub></b> | 10 mol% = 0.02(M)         | 25 mol% = 0.05(M) | 0.4 mmol                   | 0.5 mL |

**Procedure:** In a oven dried reaction tube, charged with magnetic stir-bar,  $\text{Pd}(\text{OAc})_2$  (Y mol%), N-For-Gly-OH (25 mol%), phenylmethanesulfonyl ester substrate (0.1 mmol) were added. The hydroxylating agent  $\text{PhI}(\text{TFA})_2$  (X eq.) was added to the reaction mixture followed by the HFIP(0.5 mL). The reaction tube was capped and stirred at room temperature for 15 mins and then placed to a preheated oil-bath at 70 °C. The reaction was stirred vigorously for a definite amount of time and then taken out to cool it to the room temperature. The reaction mixture was diluted with ethyl acetate and equivalent amount of 1,3,5-trimethoxybenzene (TMB) (0.1 mmol; 16.8 mg) was added to the reaction mixture. 200  $\mu\text{L}$  aliquot was taken out from the mixture, evaporated and dissolved in  $\text{CDCl}_3$  for NMR study.

Comparing the initial rate for the **Run 1** and **Run 2** an enhancement in rate can be observed with the increase in loading of palladium catalyst amount.

Initial slope for Run 1 =  $2.32 \times 10^{-2}$  (M)/h

Initial slope for Run 2 =  $3.56 \times 10^{-2}$  (M)/h

Considering a simplified rate equation  $\text{Rate} (r) = k [\text{sub}]^a [\text{Pd}]^b [\text{lig}]^c [\text{PhI}(\text{TFA})_2]^d$   
 (all terms are of usual significance)

Now,  $r_1 = 2.32 \times 10^{-2}$  (M)/h =  $k [\text{sub}]^a [0.02]^b [\text{lig}]^c [\text{PhI}(\text{TFA})_2]^d$  ..... (1)

and  $r_2 = 3.56 \times 10^{-2}$  (M)/h =  $k [\text{sub}]^a [0.03]^b [\text{lig}]^c [\text{PhI}(\text{TFA})_2]^d$  ..... (2)

Comparing the initial rate for for the Run

$[r_2 / r_1] = [3.56 / 2.32] = [0.03 / 0.02]^a$

or,  $1.53 = [1.5]^a$

or,  $a = [\log 1.53 / \log 1.5] = 1.04 \sim 1$

Therefore the kinetics of the reaction follows a first order rate dependence with respect to the palladium catalyst.

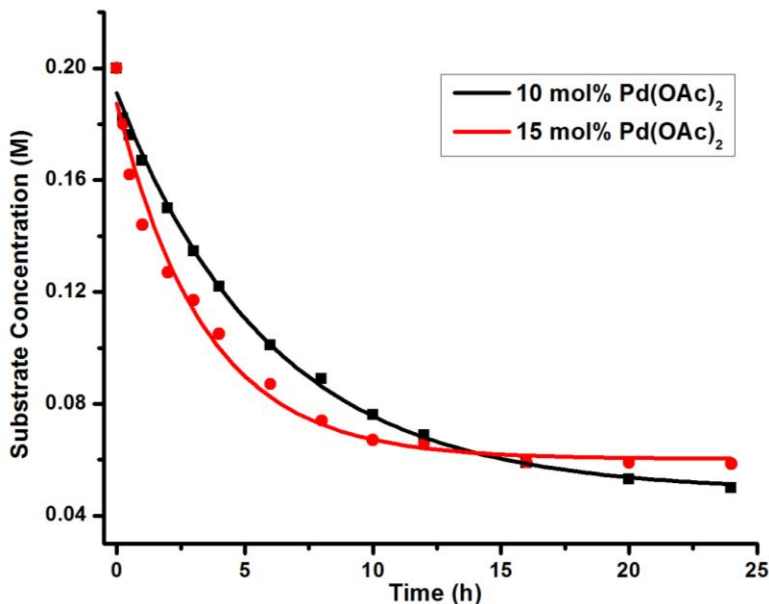

**Figure B:** Overlay kinetics plot for *Run 1* and *Run 2*

The initial rate for the *Run 1*, *Run 3* and *Run 4* was found to be almost same. As the only parameter of difference was the amount of  $\text{PhI}(\text{TFA})_2$ , therefore it is evident that the rate of the reaction is indifferent towards the amount of the  $\text{PhI}(\text{TFA})_2$ . So it can be concluded that the order of the reaction w.r.t  $\text{PhI}(\text{TFA})_2$  is zero.

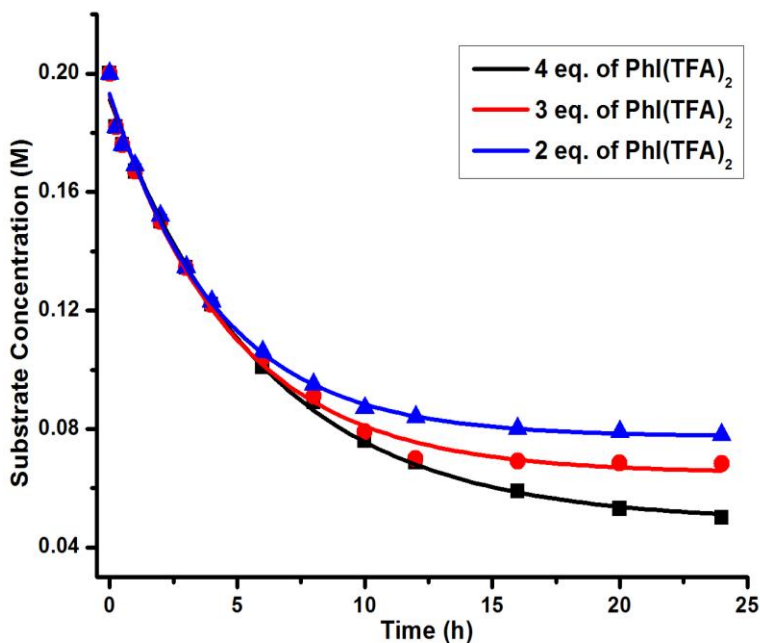

**Figure C:** Overlay of *Run 1*, *3* and *4*

Comparing the initial rate for the *Run 1* and *Run 5* an enhancement in rate can be observed with

the increase in loading of substrate.

Initial slope for Run 1 =  $2.32 \times 10^{-2}$  (M)/h

Initial slope for Run 5 =  $3.06 \times 10^{-2}$  (M)/h

Considering a simplified rate equation  $\text{Rate } (r) = k [\text{sub}]^a [\text{Pd}]^b [\text{lig}]^c [\text{PhI}(\text{TFA})_2]^0$   
(all terms are of usual significance)

Now,  $r_1 = 2.32 \times 10^{-2}$  (M)/h =  $k [0.2]^a [\text{Pd}]^1 [\text{lig}]^c$

and  $r_5 = 3.06 \times 10^{-2}$  (M)/h =  $k [0.3]^a [\text{Pd}]^1 [\text{lig}]^c$

Comparing the initial rate for for the Run

$[r_5/ r_1] = [3.06/2.32] = [0.3/0.2]^a$

or,  $1.31 = [1.5]^a$

or,  $a = [\log 1.31/\log 1.5] = 0.88 \sim 1$

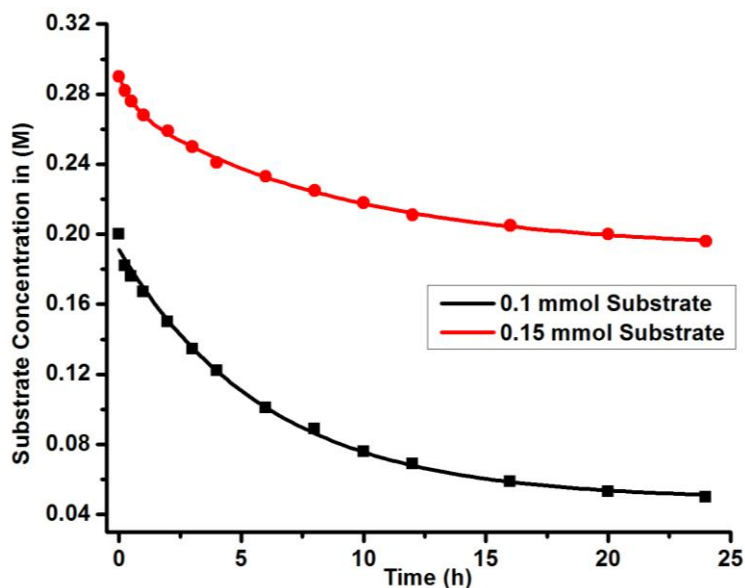

**Figure D:** Overlay of *Run 1* and *5*

Comparing the initial rate for the *Run 1* and *Run 6* an variation in rate can be observed on shifting from model substrate to  $d_5$ -substrate.

Initial slope for Run 1 =  $2.32 \times 10^{-2}$  (M)/h

Initial slope for Run 6 =  $7.67 \times 10^{-3}$  (M)/h

Considering a simplified rate equation  $\text{Rate } (r) = k [\text{sub}]^1 [\text{Pd}]^1 [\text{lig}]^c [\text{PhI}(\text{TFA})_2]^0$   
(all terms are of usual significance)

Now,  $r_1 = 2.32 \times 10^{-2}$  (M)/h =  $k [0.2]^1 [\text{Pd}]^1 [\text{lig}]^c$

and  $r_6 = 7.67 \times 10^{-3}$  (M)/h =  $k_6 [0.2]^1 [\text{Pd}]^1 [\text{lig}]^c$

Comparing the initial rate for for the Run

$[r_1/ r_6] = [2.32/0.767] = k/k_6$

or,  $3.02 = k/k_6$

or,  $k/k_6 = k_H/k_D = 3.02 = \text{KIE}$

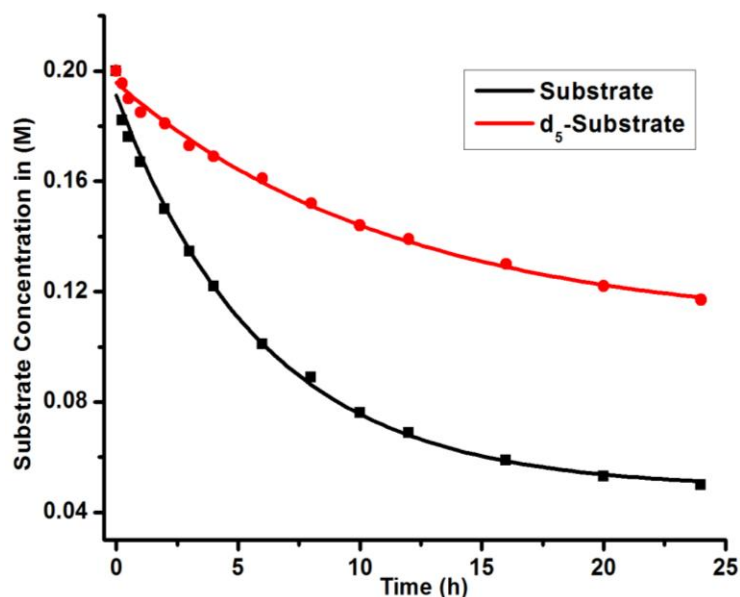

Figure E: Overlay of *Run 1* and *6*

### C. NMR Study:

This experiment was performed to monitor the progress of the reaction from the shift of the characteristic <sup>1</sup>H-NMR signal.

In this experiment following peaks were considered

- (a) –Me peak of acetate and acetic acid
- (b) Aromatic *meta* C-H peak

#### Procedure:

In a clean NMR tube HFIP (2 eq.; 6.2 μL) was added to 510 μL of CDCl<sub>3</sub> and the <sup>1</sup>H-NMR was recorded. In the same NMR tube Pd(OAc)<sub>2</sub> (1eq.; 0.03 mmol; 6.72 mg) was added and put for sonication for 20 mins at room temperature. The <sup>1</sup>H-NMR of the reaction mixture was recorded again. Following the same procedure 2.5 eq. of For-Gly-OH (7.73 mg) was added to the NMR tube followed by sonication and the NMR monitoring of the reaction. 1 eq. of the model substrate was added to the same NMR tube was placed in sonicator for 20 mins at 70 °C. The <sup>1</sup>H-NMR of the mixture was recorded. Afterwards the tube was kept for 22 hrs under sonic ation. The reaction was cooled in a salted ice-bath to nearly -20 °C and kept for 30 mins. Any change of the mixture was monitored by <sup>1</sup>H-NMR.

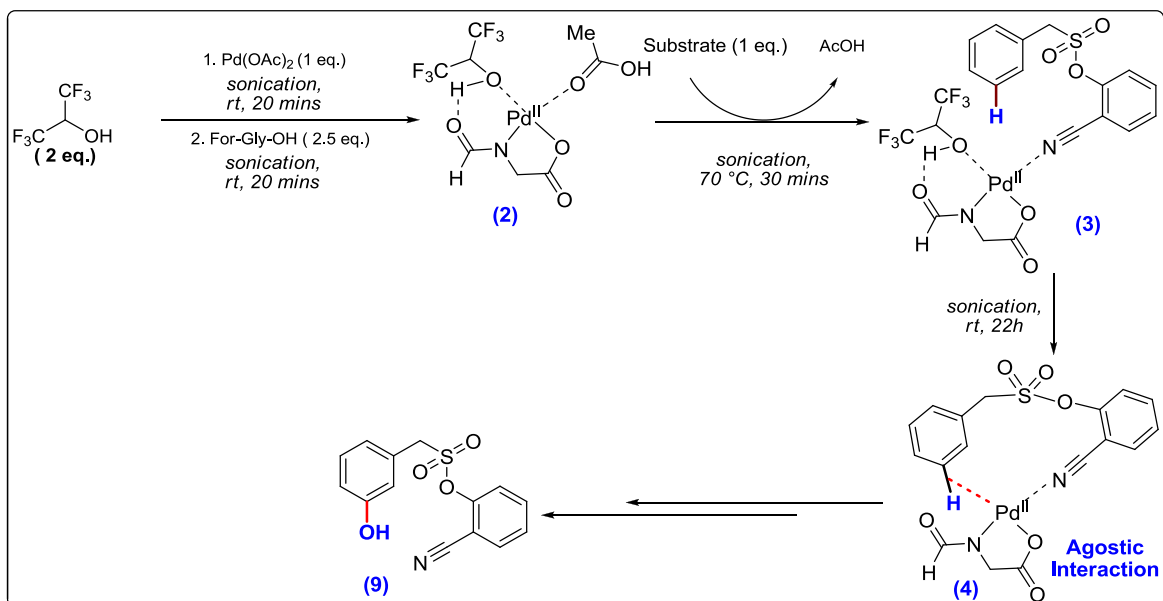

**Acetate Monitoring:** Upon addition of substrate (1) (1 eq.) to the mixture of Pd(OAc)<sub>2</sub>, ligand (2.5 eq.) and HFIP (2), the signal for AcOH intensifies (integration changes from 0.22 to 1.24 w.r.t to -Me signal of acetate of unreacted Pd(OAc)<sub>2</sub>, as 1.00). Notably same observation was not **observed in absence of ligand** signifies that simple Pd(OAc)<sub>2</sub> does not release AcOH in presence of substrate in the similar fashion.

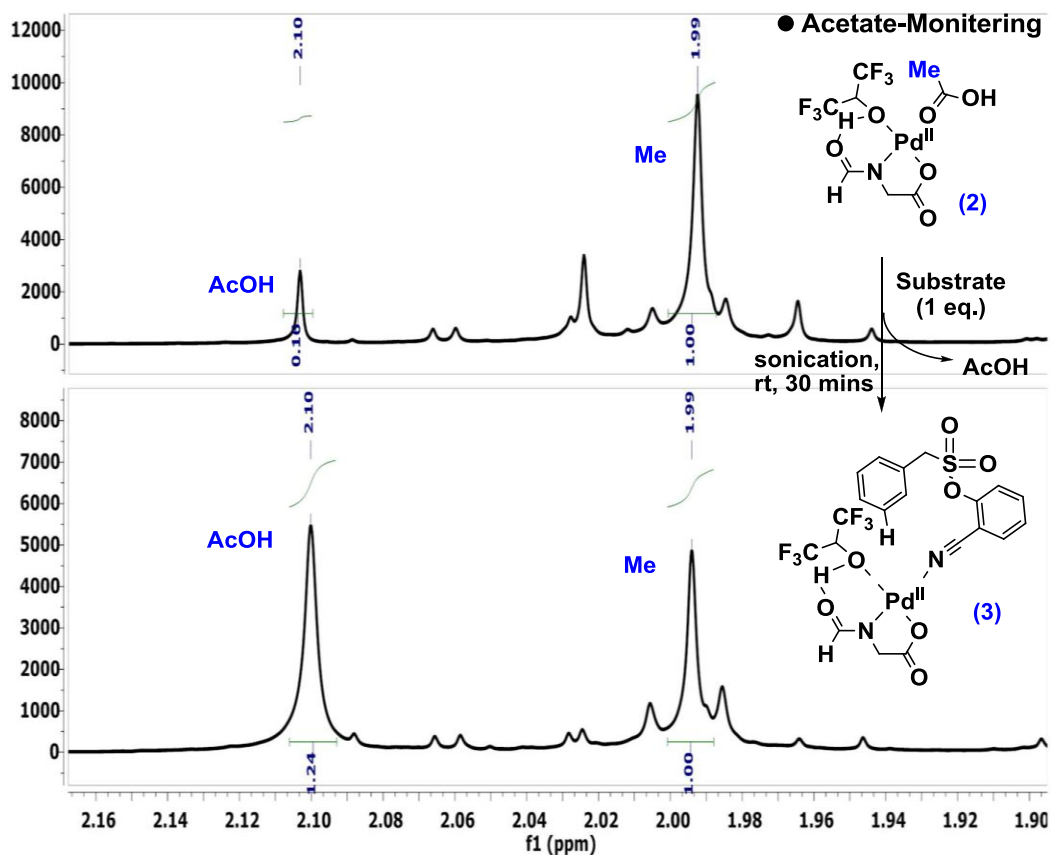

**Aromatic Monitoring:** The addition of substrate (1) to the mixture of Pd(OAc)<sub>2</sub>, ligand and HFIP does not show any change in aromatic signal of 1. However upon sonication for 22 h followed by cooling at 0 °C, a distinct variation in peak patterns and slight change in peak values

were observed, with no change in number of aromatic protons ( $\delta$ , 7.37-7.41 ppm). According to the literature,<sup>3</sup> the interaction of the metal with the  $-H$  will be reflected in the change of  $J$  values. Thus the interaction of the aromatic C-H bond (likely *meta* C-H bond) with palladium (as shown above) will hinder the interaction with neighboring C-H and the H-H coupling will be disturbed. The extent of variation will depend on the strength of the interaction. The distinct change in the splitting pattern (as circled in the above figure) is likely to indicate the weak interaction between which eventually leads to the C-H activation via agostic interaction.

In order to verify the above conclusion various control experiments were done omitting various components separately. In case of Pd(OAc)<sub>2</sub>, same experiment was conducted following the same procedure **without addition of Pd(OAc)<sub>2</sub>**. Even after 48h of standing **no variation** was observed in the aromatic region of the spectra. These observations suggest the presence of Pd(OAc)<sub>2</sub> along with the substrate is essential for the above mentioned changes.

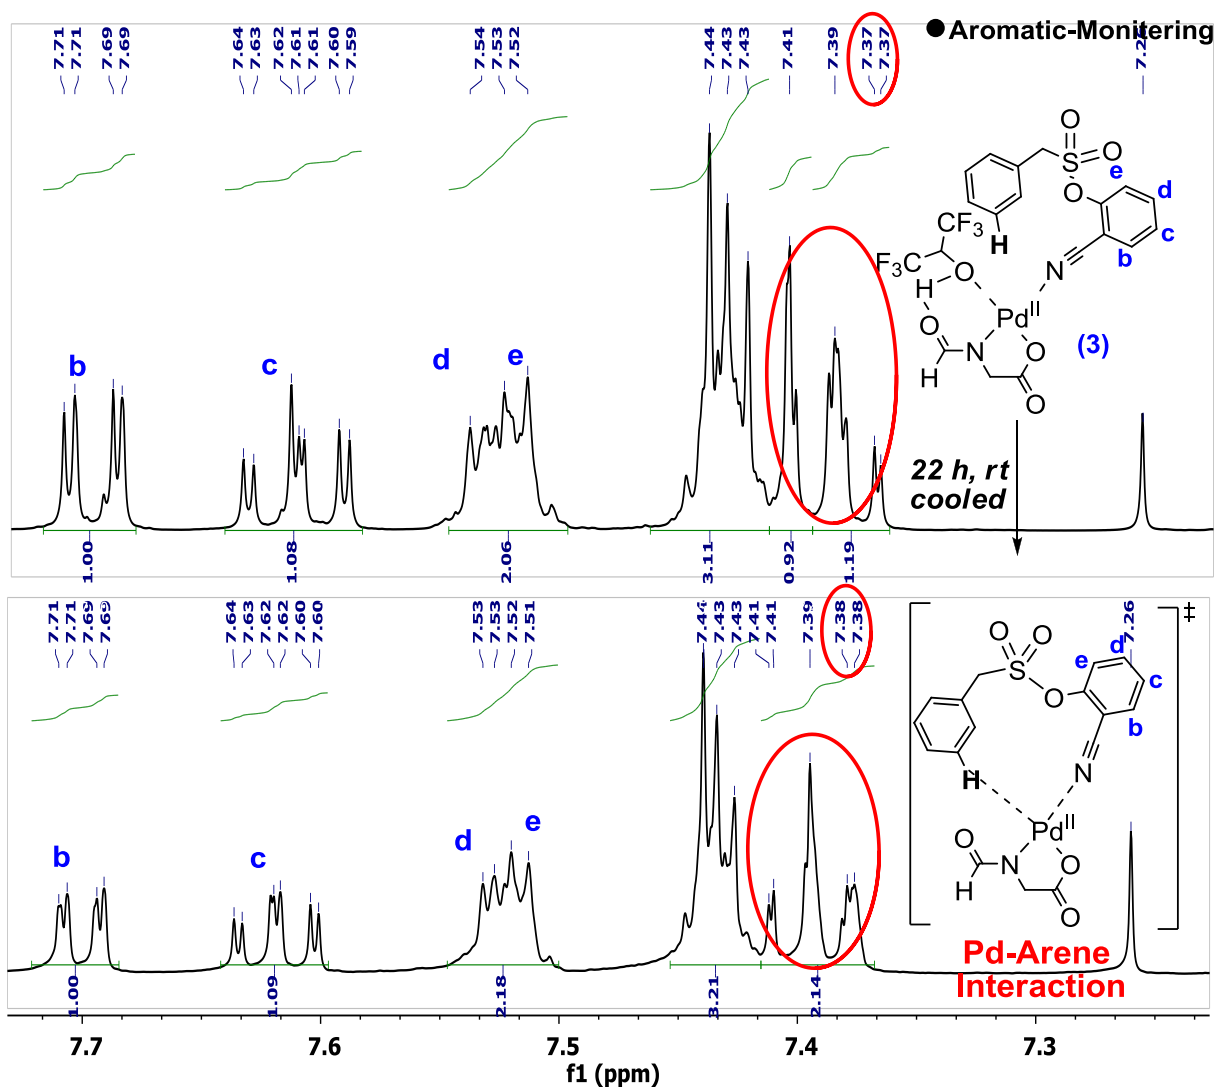

#### D. Mass Study:

In order to study the metal-ligand interaction, the following experiment was performed.

**Experiment 1:** In a clean oven dried reaction tube, charged with magnetic stir-bar, Pd(OAc)<sub>2</sub> (1 eq.) was added with For-Gly-OH (2 eq.) and HFIP. The mixture was stirred at 70 °C for 2 hrs. The mixture was cooled to the room temperature and divided in three portions.

Portion 1: The reaction mixture was diluted with MeCN and subjected to mass analysis.

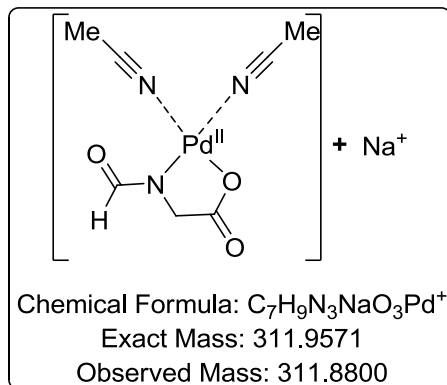

Portion 2: The reaction mixture was diluted with MeOH and kept overnight for stirring at room temperature.

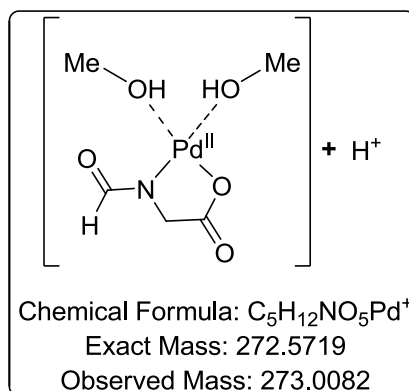

Portion 3: The reaction mixture was diluted with HFIP, water and few drops of MeCN and subjected to mass analysis.

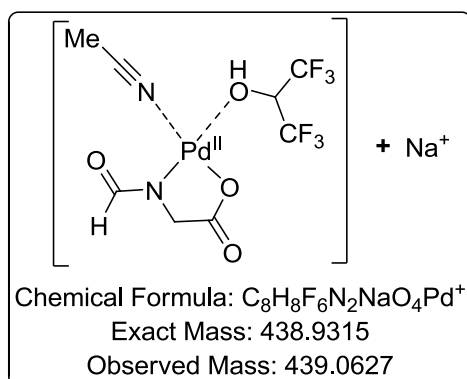

### **E. IR Study:**

Substrate =  $2237\text{ cm}^{-1}$

[Substrate +  $Pd(OAc)_2$ ] =  $2247\text{ cm}^{-1}$

[Substrate +  $Pd(OAc)_2$  + *N*-For-Gly] =  $2250\text{ cm}^{-1}$

## VI. Application:

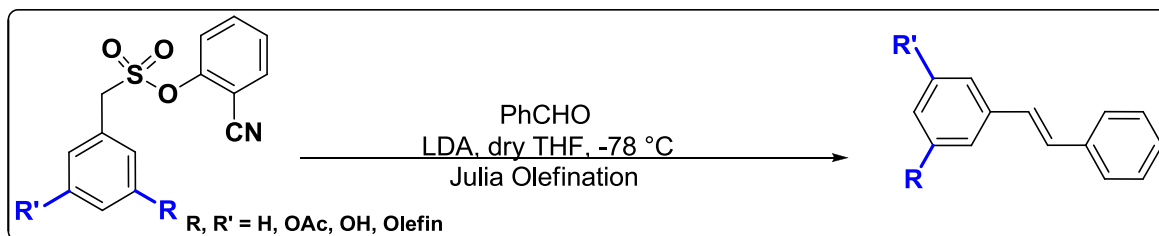

To a flame dried round bottomed flask equipped with magnetic stir-bar, freshly prepared LDA (2M); 240  $\mu$ L) and dry THF (6 mL) was added. The solution was cooled to -78 °C. Separately a solution of benzaldehyde and the *meta*-functionalized compound (0.2 mmol) in dry THF (15 mL) was prepared and slowly added to the LDA/THF solution at -78 °C. The reaction mixture was stirred overnight while warmed it to room temperature. Upon completion the reaction was quenched with saturated NH<sub>4</sub>Cl solution and extracted with ethyl acetate. The organic portion was dried over anhydrous Na<sub>2</sub>SO<sub>4</sub>, concentrated under reduced pressure and purified through column chromatography.

The above mentioned procedure was followed for the following reactions.

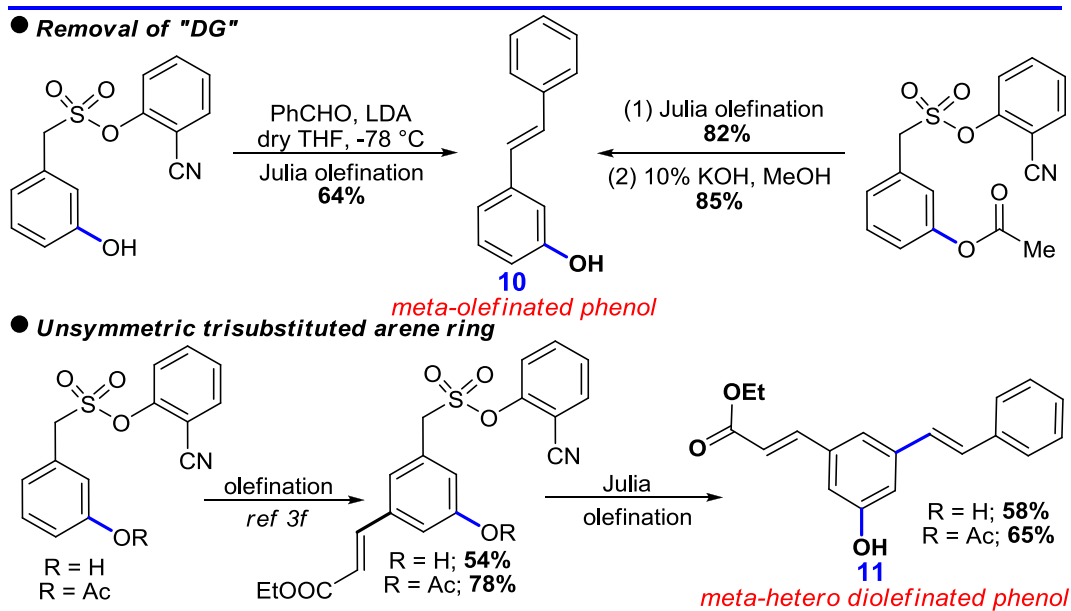



● **Resveratrol precursor**

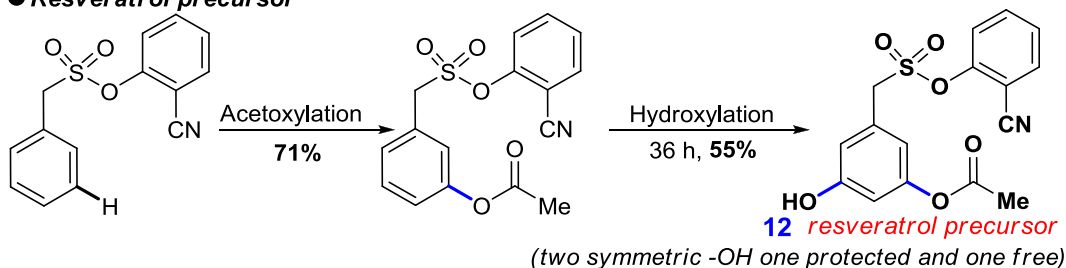

● **Quinone Reductase (QR) inducer**

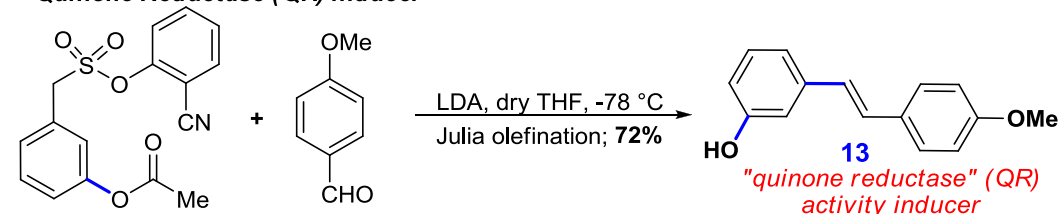

In case of synthesis of **11** from hydroxylated substrate (R=H), the double amount of LDA was used. For the synthesis of compound **12**, hydroxylation reaction was continued for 36 h.

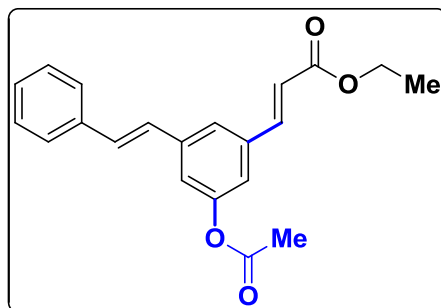

**(E)-ethyl 3-(3-acetoxy-5-((2-cyanophenoxysulfonyl)methyl)phenyl)acrylate:**

<sup>1</sup>H NMR (400 MHz, Chloroform-*d*)  $\delta$  7.73 – 7.68 (dd,  $J$  = 7.7, 1.7 Hz, 1H), 7.68 – 7.60 (m, 2H), 7.56 – 7.49 (t,  $J$  = 1.6 Hz, 1H), 7.46 – 7.37 (m, 2H), 7.35 – 7.30 (t,  $J$  = 1.8 Hz, 2H), 6.51 – 6.42 (d,  $J$  = 16.0 Hz, 1H), 4.75 – 4.71 (s, 2H), 4.30 – 4.22 (q,  $J$  = 7.1 Hz, 2H), 2.35 – 2.28 (s, 3H), 1.40 – 1.29 (t,  $J$  = 7.1 Hz, 3H).

<sup>13</sup>C NMR (101 MHz, CDCl<sub>3</sub>)  $\delta$  14.48, 21.29, 58.00, 60.96, 107.46, 114.88, 120.88, 122.20, 123.64, 125.89, 127.69, 128.19, 128.72, 134.02, 134.78, 137.12, 142.51, 150.12, 151.56, 166.58, 169.19.

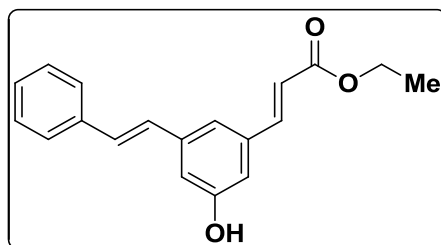

**(E)-ethyl 3-(3-hydroxy-5-styrylphenyl)acrylate:**

<sup>1</sup>H NMR (400 MHz, Chloroform-*d*)  $\delta$  7.54 – 7.48 (d,  $J$  = 16.0 Hz, 1H), 7.25 – 7.19 (s, 3H), 6.99 – 6.95 (s, 1H), 6.86 – 6.82 (t,  $J$  = 2.0 Hz, 1H), 6.73 – 6.70 (s, 1H), 6.67 – 6.62 (d,  $J$  = 12.2 Hz, 1H), 6.55 – 6.48 (d,  $J$  = 12.3 Hz, 1H), 6.30 – 6.22 (d,  $J$  = 16.0 Hz, 1H), 4.28 – 4.20 (q,  $J$  = 7.1 Hz, 2H), 1.37 – 1.29 (t,  $J$  = 7.1 Hz, 3H).

$^{13}\text{C}$  NMR (101 MHz,  $\text{CDCl}_3$ )  $\delta$  14.52, 60.75, , 113.40, 117.61, 118.99, 121.97, 127.65, 128.57, 129.06, 129.21, 129.24, 131.70, 136.25, 139.58, 144.27, 155.97, 167.12.

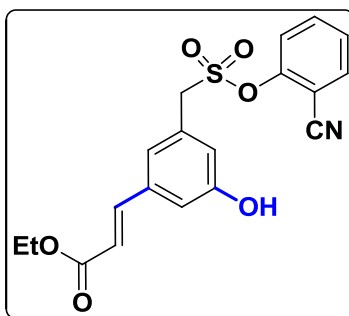

**(E)-ethyl 3-(3-((2-cyanophenoxy)sulfonyl)methyl)-5-hydroxyphenyl)acrylate:**

$^1\text{H}$  NMR (400 MHz, Chloroform-*d*)  $\delta$  7.73 – 7.67 (dd,  $J = 7.7, 1.6$  Hz, 1H), 7.67 – 7.56 (m, 2H), 7.55 – 7.48 (dd,  $J = 8.3, 1.1$  Hz, 1H), 7.43 – 7.35 (td,  $J = 7.7, 1.1$  Hz, 1H), 7.21 – 7.16 (t,  $J = 1.5$  Hz, 1H), 7.15 – 7.11 (t,  $J = 1.9$  Hz, 1H), 7.10 – 7.05 (m, 1H), 6.47 – 6.40 (d,  $J = 16.1$  Hz, 1H), 4.71 – 4.62 (s, 2H), 4.31 – 4.21 (q,  $J = 7.2$  Hz, 2H), 1.36 – 1.29 (t,  $J = 7.1$  Hz, 3H).

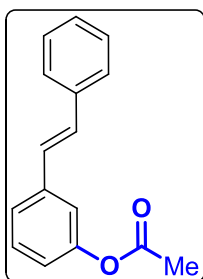

**(E)-3-styrylphenyl acetate:**

$^1\text{H}$  NMR (400 MHz, Chloroform-*d*)  $\delta$  7.31 – 7.15 (ddd,  $J = 13.2, 4.7, 2.2$  Hz, 5H), 7.13 – 7.06 (m, 1H), 6.99 – 6.95 (t,  $J = 1.9$  Hz, 1H), 6.95 – 6.88 (dd,  $J = 8.6, 2.2$  Hz, 1H), 6.67 – 6.62 (s, 0H), 6.63 – 6.55 (d,  $J = 17.1$  Hz, 1H), 6.55 – 6.50 (s, 0H), 2.27 – 2.20 (s, 3H).

$^{13}\text{C}$  NMR (101 MHz,  $\text{CDCl}_3$ )  $\delta$  21.32, 76.91, 77.54, 110.22, 120.48, 122.14, 126.58, 127.52, 128.50, 129.09, 129.33, 129.37, 131.33, 136.95, 139.02, 150.83, 169.55.

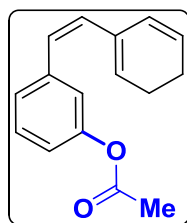

**(Z)-3-(2-(cyclohexa-1,5-dienyl)vinyl)phenyl acetate:**

$^1\text{H}$  NMR (400 MHz, Chloroform-*d*)  $\delta$  7.54 – 7.47 (dt,  $J = 8.1, 1.0$  Hz, 2H), 7.41 – 7.32 (m, 4H), 7.32 – 7.22 (m, 2H), 7.10 – 7.07 (d,  $J = 2.5$  Hz, 2H), 7.02 – 6.95 (ddd,  $J = 5.0, 3.9, 2.3$  Hz, 1H), 2.41 – 2.27 (s, 3H).

$^{13}\text{C}$  NMR (101 MHz,  $\text{CDCl}_3$ )  $\delta$  21.39, 76.91, 77.55, 119.47, 120.86, 124.41, 126.83, 127.93, 128.10, 128.93, 129.81, 130.02, 137.21, 139.30, 151.31, 169.69.

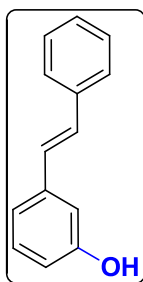

**(E)-3-styrylphenol:**

$^1\text{H NMR}$  (500 MHz, Chloroform-*d*)  $\delta$  7.59 – 7.16 (m, 5H), 7.14 – 7.08 (t,  $J = 7.8$  Hz, 1H), 6.85 – 6.79 (d,  $J = 7.6$  Hz, 1H), 6.73 – 6.65 (m, 2H), 6.62 – 6.51 (m, 2H).

$^{13}\text{C NMR}$  (126 MHz,  $\text{CDCl}_3$ )  $\delta$  29.91, 76.98, 77.48, 114.39, 115.66, 121.83, 127.39, 128.45, 129.13, 129.74, 130.03, 130.85, 139.11, 155.59.

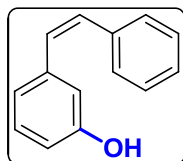

**(Z)-3-styrylphenol:**

$^1\text{H NMR}$  (500 MHz, Chloroform-*d*)  $\delta$  7.55 – 7.49 (m, 2H), 7.40 – 7.31 (td,  $J = 7.6, 1.4$  Hz, 2H), 7.30 – 7.19 (m, 2H), 7.12 – 7.04 (m, 3H), 7.02 – 6.98 (q,  $J = 1.7$  Hz, 1H), 6.77 – 6.72 (m, 1H).

$^{13}\text{C NMR}$  (126 MHz,  $\text{CDCl}_3$ )  $\delta$  29.93, 76.98, 77.48, 113.16, 114.88, 119.65, 126.77, 127.95, 128.46, 128.91, 129.40, 130.08, 137.36, 156.05.

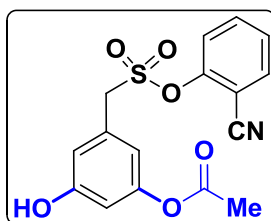

**3-((2-cyanophenoxy)sulfonyl)methyl-5-hydroxyphenyl acetate:**

$^1\text{H NMR}$  (500 MHz, Chloroform-*d*)  $\delta$  7.74 – 7.68 (dd,  $J = 7.7, 1.7$  Hz, 1H), 7.68 – 7.61 (ddd,  $J = 8.4, 7.6, 1.7$  Hz, 1H), 7.48 – 7.39 (m, 2H), 7.42 – 7.37 (m, 1H), 7.24 – 7.21 (d,  $J = 1.7$  Hz, 2H), 4.71 – 4.65 (s, 2H), 2.34 – 2.26 (s, 3H).

$^{13}\text{C NMR}$  (101 MHz,  $\text{CDCl}_3$ )  $\delta$  21.22, 57.80, 76.91, 77.55, 107.44, 111.44, 115.16, 115.69, 115.91, 120.45, 123.62, 127.74, 129.24, 134.04, 134.80, 149.99, 151.87, 168.93.

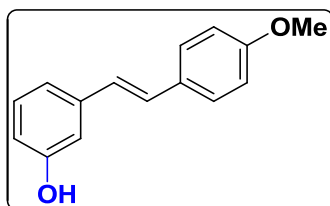

**(E)-3-(4-methoxystyryl)phenol:**

$^1\text{H NMR}$  (500 MHz, Chloroform-*d*)  $\delta$  7.48 – 7.41 (m, 2H), 7.25 – 7.19 (t,  $J = 7.9$  Hz, 1H), 7.09 – 7.00 (m, 2H), 6.98 – 6.96 (t,  $J = 2.0$  Hz, 1H), 6.95 – 6.87 (m, 3H), 6.75 – 6.68 (ddd,  $J = 8.1, 2.6, 0.9$  Hz, 1H), 3.84 – 3.82 (s, 3H).

$^{13}\text{C}$  NMR (101 MHz,  $\text{CDCl}_3$ )  $\delta$  55.56, 76.91, 77.55, 112.92, 114.36, 114.49, 119.35, 126.40, 127.99, 128.89, 130.02, 130.20, 139.62, 156.07, 159.57.

$^{13}\text{C}$  NMR DEPT (101 MHz,  $\text{CDCl}_3$ )  $\delta$  55.35, 112.71, 114.15, 114.28, 119.14, 126.19, 127.78, 128.68, 129.81.

## Reference:

1. M. Bera; A. Maji; S. K. Sahoo; D. Maiti *Angew. Chem. Int. Ed.* 2015, **54**, 8515.
2. A. R. Katritzky; B. Yang; G. Qiu; Z. Zhang *Synthesis* 1999, **1**, 55.
3. M. Brookhart; M. L. H. Green *J. Organomet. Chem.* 1983, **250**, 395.

## VII. Computational Methods

Computations were performed using Gaussian09 (Revision D.01) suite of quantum chemical program.<sup>1</sup> The geometries were optimized in the solvent phase using the M06<sup>2</sup> hybrid density functional theory using Pople's 6-31G\*\* basis set for all atoms except Palladium. Los Alamos pseudopotential (LANL2DZ) basis set consisting of an effective core potential (ECP) for 28 core electrons and a double- $\zeta$  quality valence basis set for 18 valence electrons was employed for Palladium atom.<sup>3</sup> All the stationary points were characterized, as minima or a first-order saddle point (transition states) by evaluating the corresponding Hessian indices. The transition states were verified by examining whether it has a unique imaginary frequency representing the desired reaction coordinate. Intrinsic reaction coordinate (IRC) calculations were additionally carried out to further characterise the true nature of the transition states.<sup>4</sup> The effect of a solvent continuum in dielectric (dielectric constant  $\epsilon=16.7$  is nearly equal to the solvent HFIP used in the reaction) was evaluated using the Cramer–Truhlar continuum solvation model that employs quantum mechanical charge densities of solutes, designated as SMD.<sup>5</sup> Graphical representation of the optimized geometries are created by using CYLView.<sup>6</sup> Further analysis of the transition states (*meta*, *ortho* and *para*) were performed using the *Activation Strain* model, wherein the *distortion energy* of each of the reacting partner at the transition state is computed with respect to the native undistorted reactant(s) and the *interaction energy* between such distorted reactants are then estimated.<sup>7</sup> Weinhold's natural bond orbital (NBO) approaches also carried out for further analysis of *meta*, *ortho* and *para* C-H activation.<sup>8</sup>

## VIII. Case Study:

### A. Hydroxylation product using N-Formyl-Glycine

#### (1) N-H activation of the N-For-Gly ligand

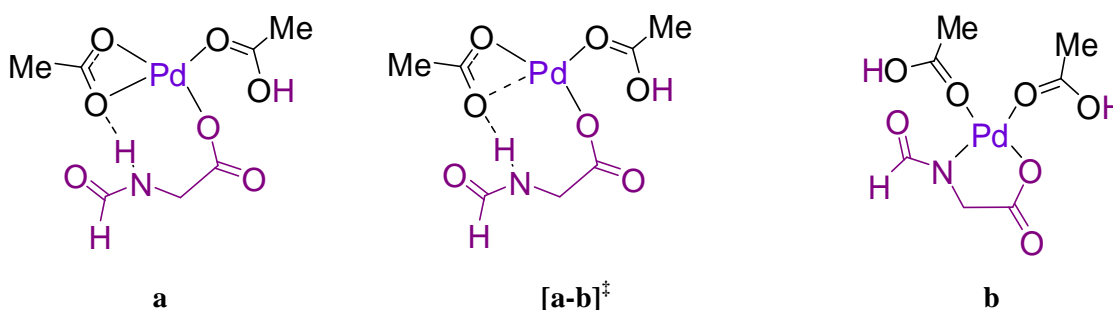

**Figure S4:** Deprotonation of N-H of the ligand at the  $\text{SMD}_{(\epsilon=16.7)}/\text{M06}/6\text{-}31\text{G}^{**}$  level of theory.

## (2) Palladium Acetate with Different Ligand Combinations and the Potential Active Catalyst

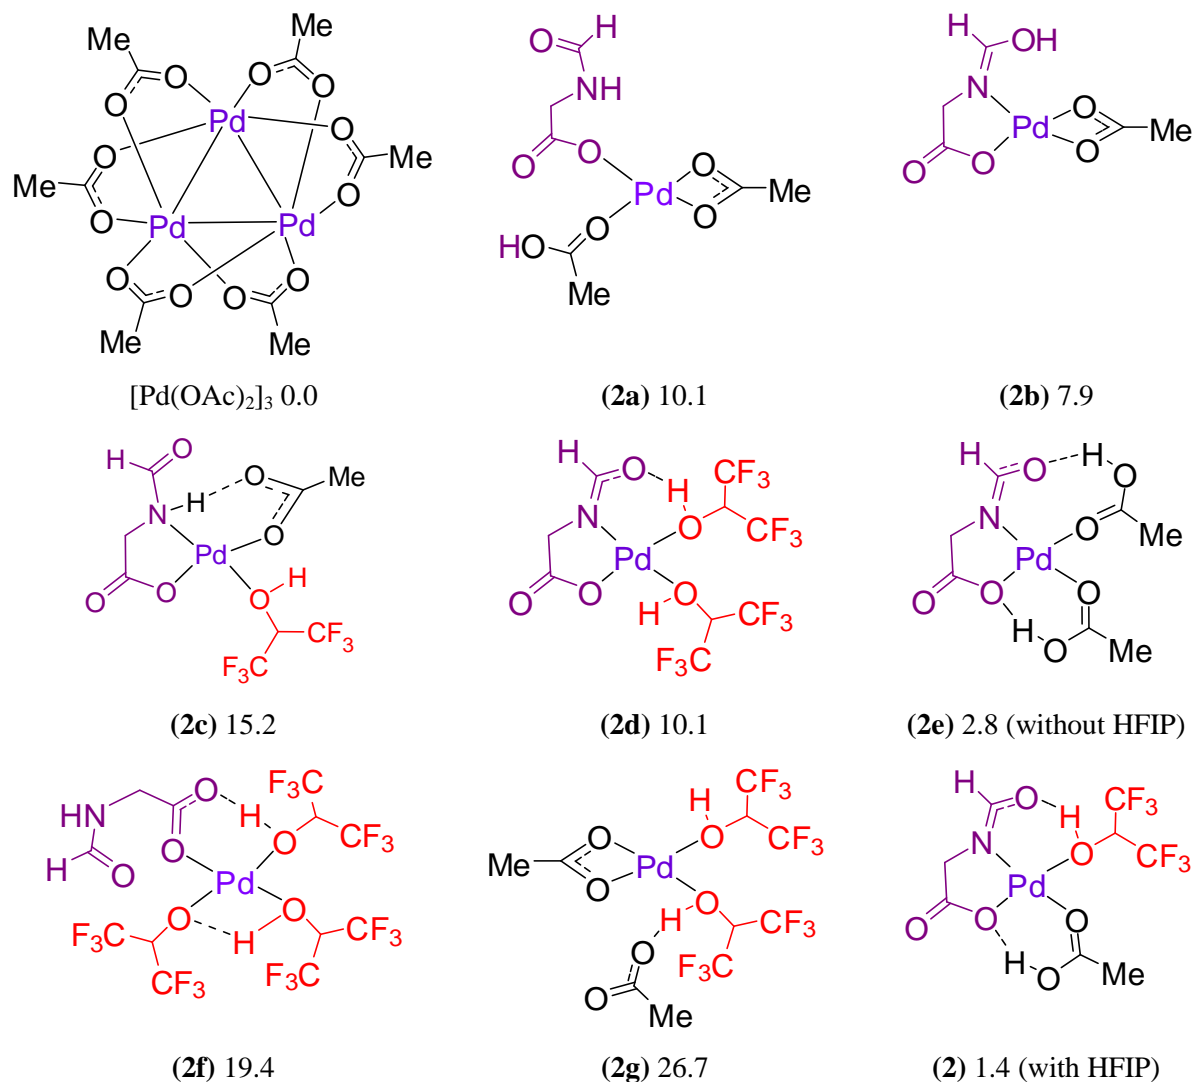

**Figure S5:** Different possibilities of potential active catalyst at the SMD<sub>(ε=16.7)</sub>/M06/6-31G\*\* level of theory. The lowest energy species **(2)** is highlighted.

## (3) Various Binding Modes between Palladium Acetate, N-For-Gly Ligand and the Substrate

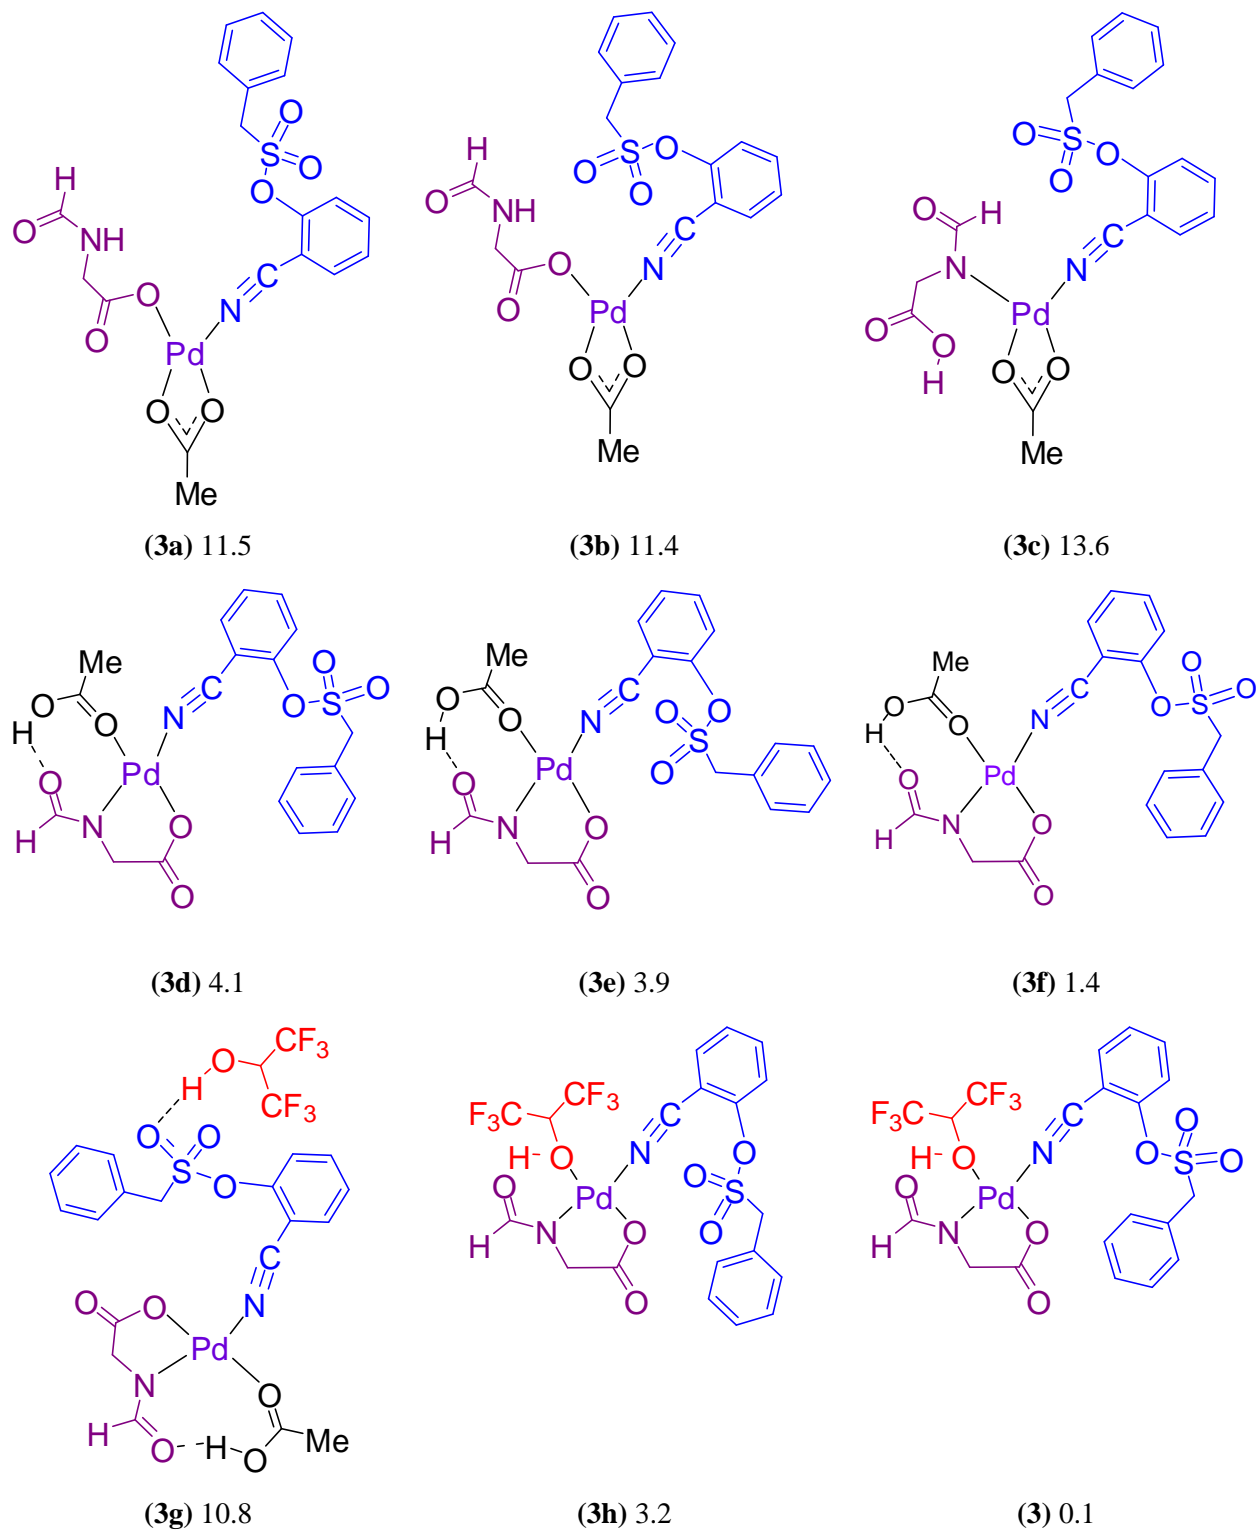

**Figure S6:** Relative energies of different possible combinations of palladium acetate, ligand and the substrate at the  $\text{SMD}_{(\epsilon=16.7)}/\text{M06}/6\text{-}31\text{G}^{**}$  level of theory. The lowest energy species (**3**) is highlighted.

#### (4) C-H activation

**Table S20:** Relative Gibbs Free Energies (in kcal/mol) of the C-H Bond Activation Transition States at the *meta*, *ortho* and *para* Positions at the SMD( $\epsilon=16.7$ )/M06/6-31G\*\* Level of Theory

| Conformation/Configuration | <i>meta</i> | <i>ortho</i> | <i>para</i> |
|----------------------------|-------------|--------------|-------------|
| <b>A</b>                   | 28.3        | 33.8         | 30.8        |
| <b>B</b>                   | 21.0        | 26.0         | 21.9        |
| <b>C</b>                   | 16.4        | 20.9         | 17.9        |
| <b>D</b>                   | 32.3        | 38.2         | 34.4        |
| <b>E</b>                   | 36.9        | 36.1         | 37.2        |
| <b>F</b>                   | 27.4        | 27.4         | 25.0        |
| <b>G</b>                   | 51.9        | -            | 37.2*       |
| <b>H</b>                   | 26.1        |              | 30.7        |

The lowest energy possibility (C) is highlighted

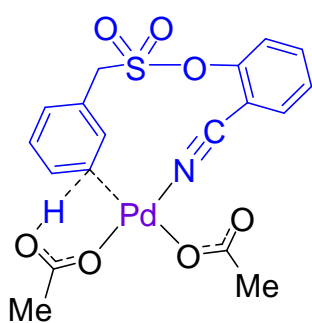

(A)

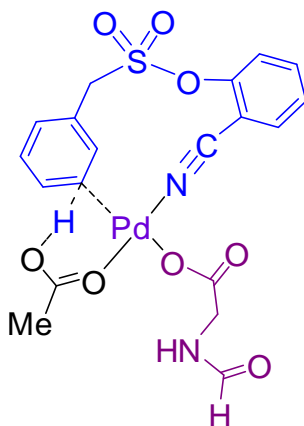

(B)

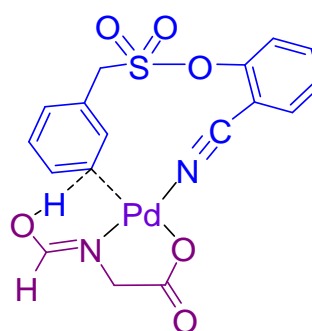

(C) [4-5]<sup>‡</sup>

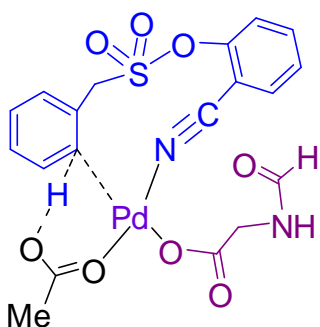

(D)

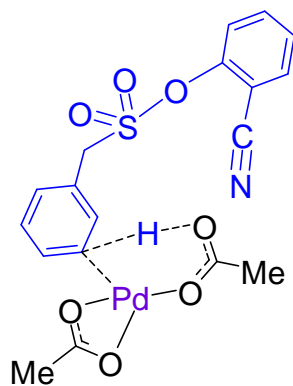

(E)

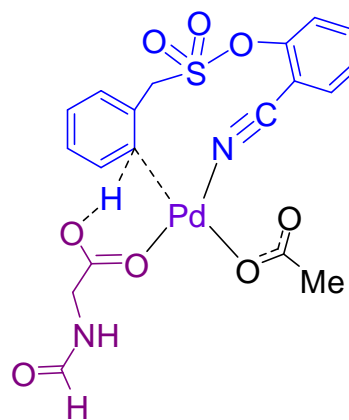

(F)

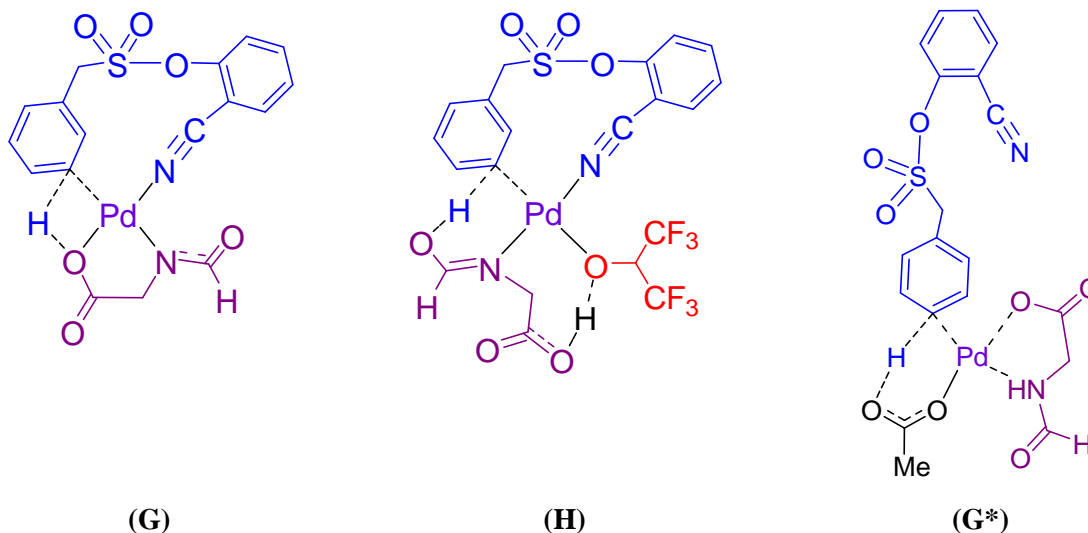

**Figure S7:** *meta* C-H bond activation transition states at the SMD<sub>(ε=16.7)</sub>/M06/6-31G\*\* level of theory. (Similar possibilities for the *ortho* and *para* C-H bond activation were also examined).

#### (4) Reductive Elimination

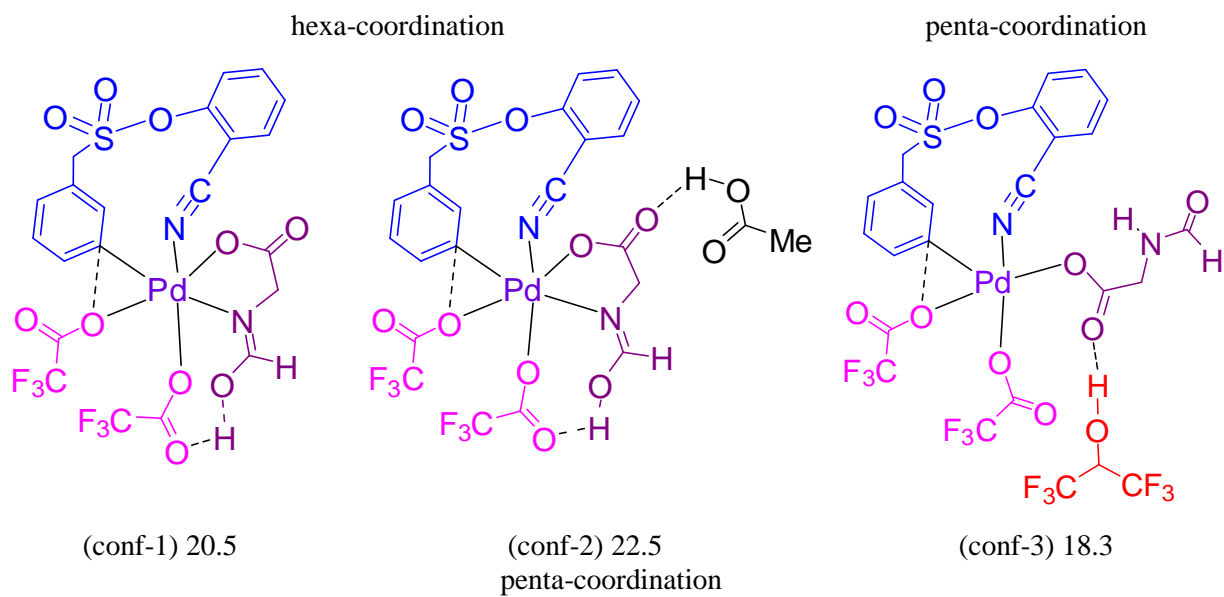



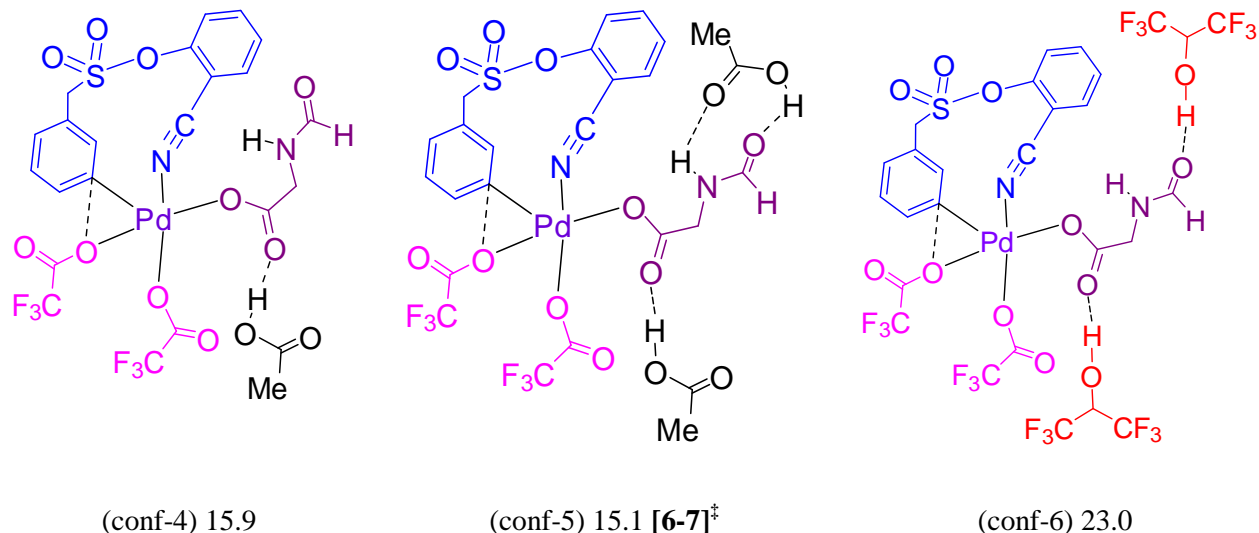

**Figure S8:** Different possibilities of reductive elimination transition states at the  $\text{SMD}_{(\epsilon=16.7)}/\text{M06}/6\text{-}31\text{G}^{**}$  level of theory. The lowest energy possibility is highlighted.

## B. Acetoxylation product using Boc-Ala-OH

The acetoxylation pathway has been initially investigated in the gas phase. Transition states and intermediates that are found to be energetically lower were then re-optimized in the solvent phase. Free Energy values in parenthesis are obtained through the gas phase optimization.

### (1) N-H activation of the Boc-Ala-OH ligand

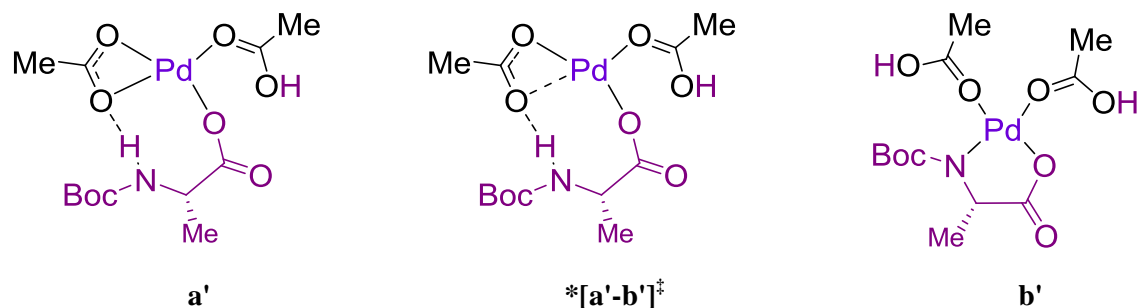

**Figure S9:** The N-H deprotonation of the ligand at the  $\text{SMD}_{(\epsilon=16.7)}/\text{M06}/6\text{-}31\text{G}^{**}$  level of theory. (\*= $\text{SMD}_{(\epsilon=16.7)}/\text{M06}/6\text{-}31\text{G}^{**}/\text{M06}/6\text{-}31\text{G}^{**}$ )

**(2) Palladium Acetate with Different Ligand Combinations and the Potential Active Catalyst**

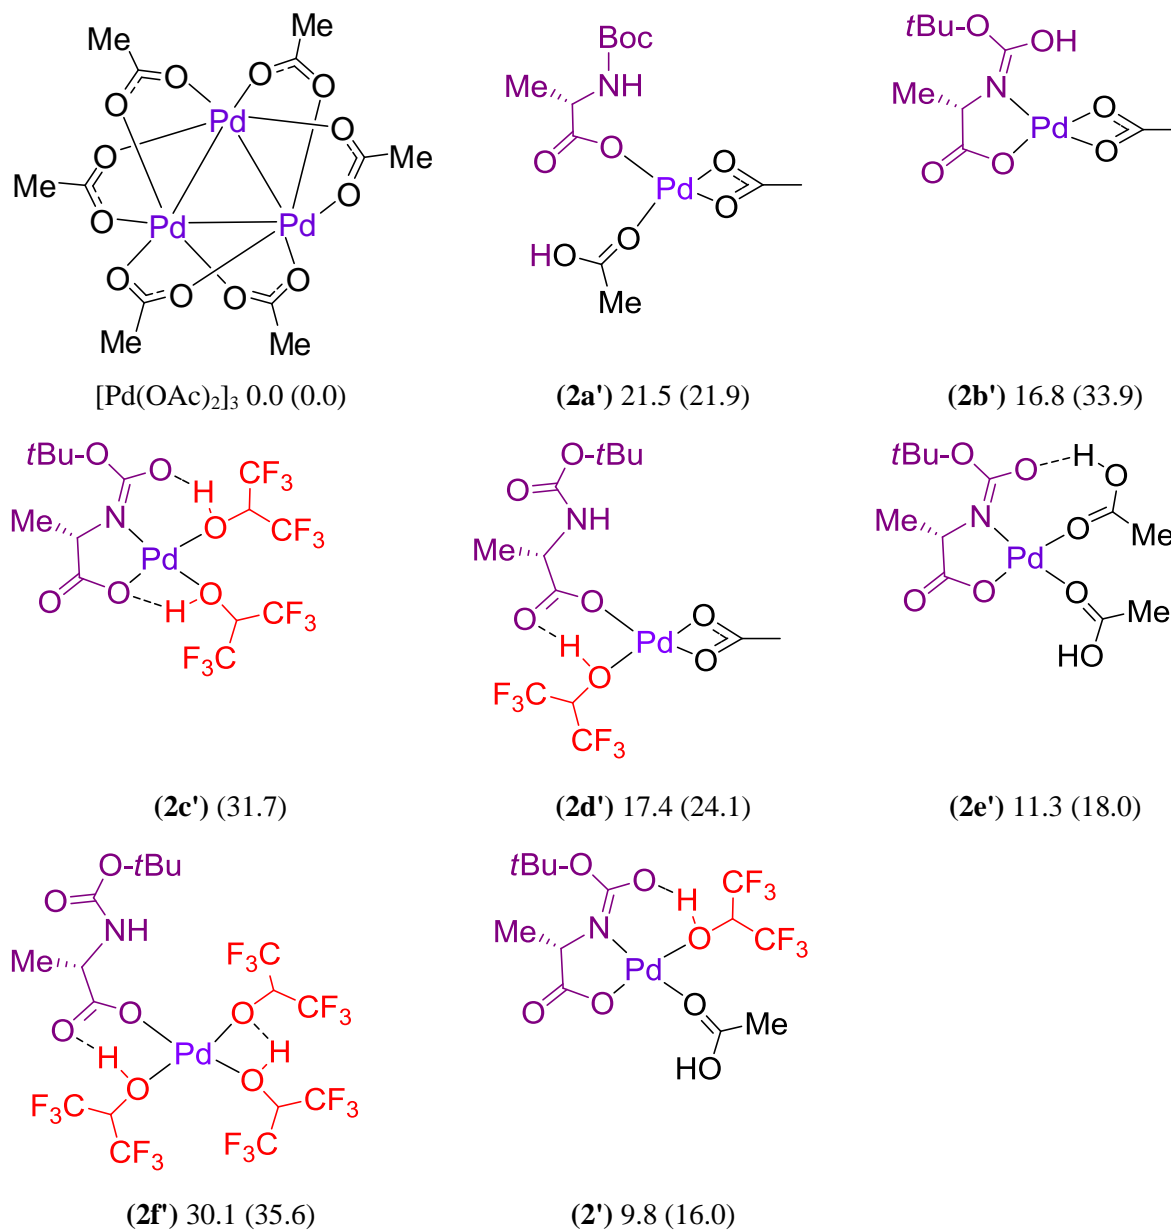

**Figure S10:** Different possibilities of potential active catalyst at the SMD<sub>(ε=16.7)</sub>/M06/6-31G\*\* level of theory. The values in parenthesis are at the M06/6-31G\*\* level of theory. The lowest energy species (**2'**) is highlighted.

**(3) Various Binding Modes between Palladium Acetate, Boc-Ala-OH Ligand and the Substrate**

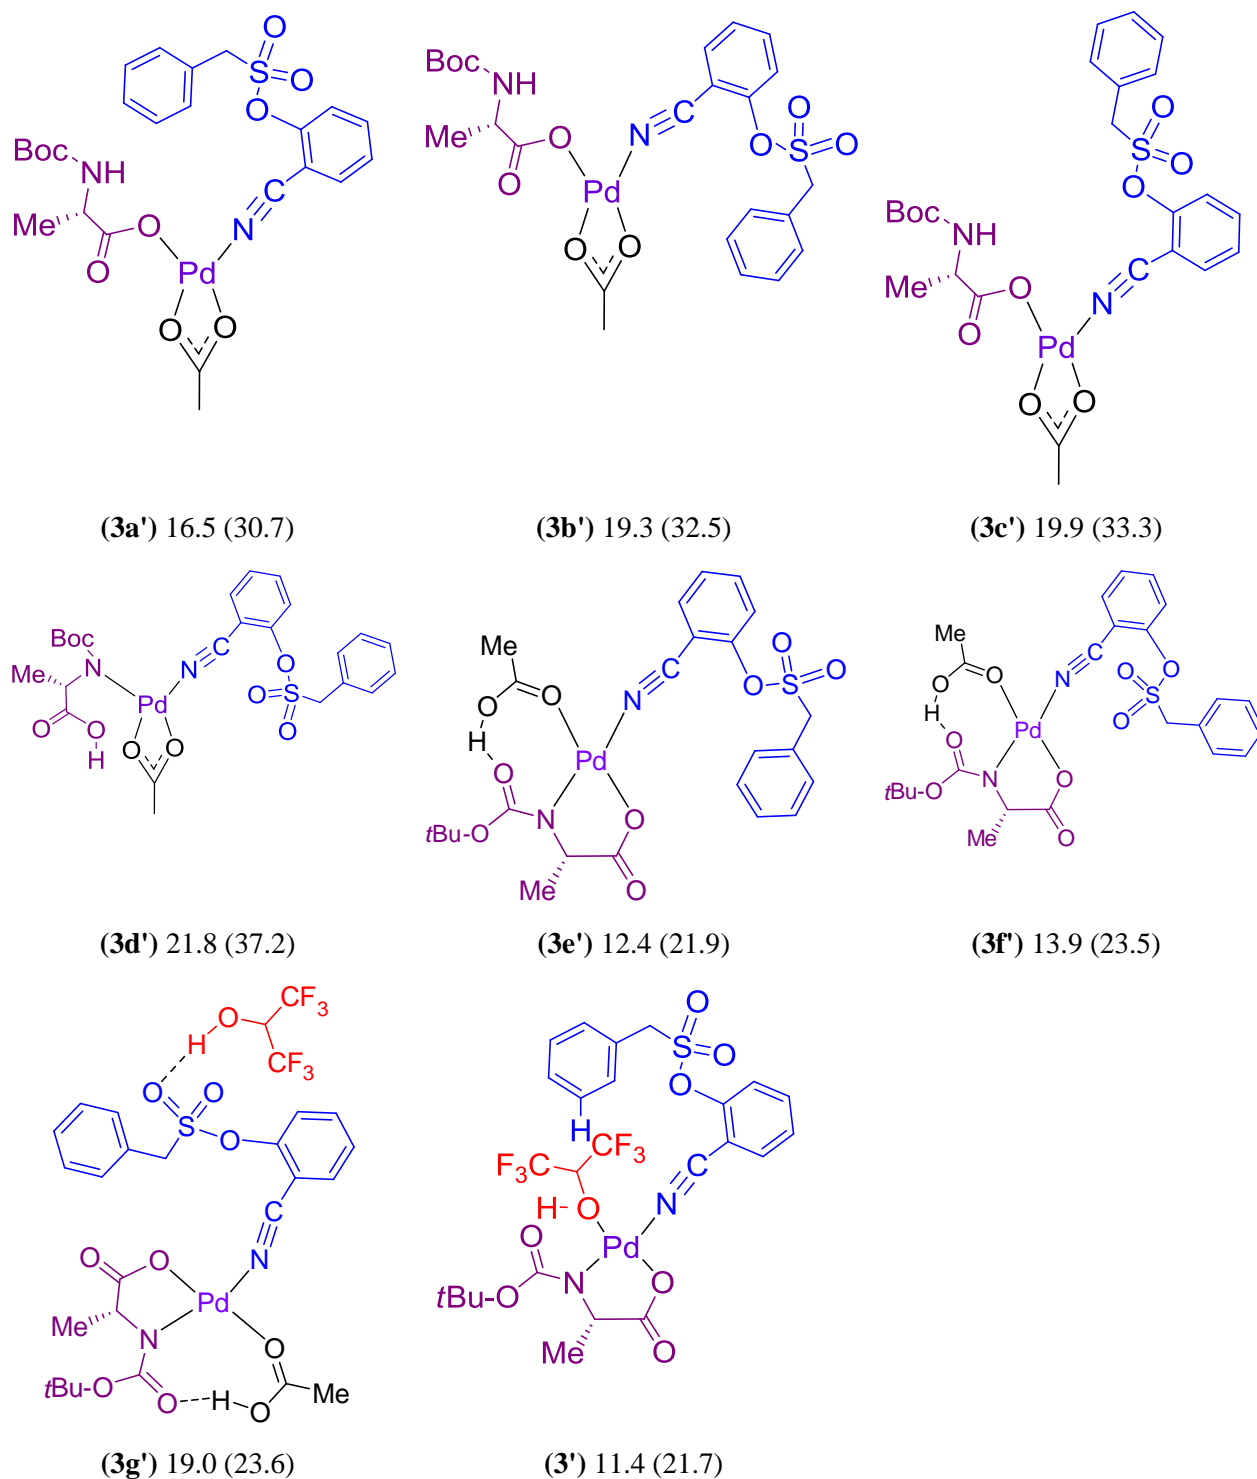

**Figure S11:** Different possible combinations of palladium acetate, ligand and the substrate at the  $\text{SMD}_{(\epsilon=16.7)}/\text{M06/6-31G}^{**}$  level of theory. The values in parenthesis is  $\text{M06/6-31G}^{**}$  level of theory. The lowest energy species (**3'**) is highlighted.

#### (4) C-H activation

**Table S21:** Relative Gibbs Free Energies (in kcal/mol) of the C-H Bond Activation Transition States at the *meta*, *ortho* and *para* Positions at the SMD( $\epsilon=16.7$ )/M06/6-31G\*\* Level of Theory. The Values in Parenthesis are at the M06/6-31G\*\* Level of Theory

| Conformation/Configuration | <i>meta</i> | <i>Ortho</i> | <i>para</i> |
|----------------------------|-------------|--------------|-------------|
| <b>A'</b>                  | (34.5)      | (39.0)       | (33.2)      |
| <b>B'</b>                  | 27.8 (32.3) | 33.9 (35.7)  | 29.8 (33.2) |
| <b>C'</b>                  | 26.4 (36.4) | 29.9 (41.4)  | 28.5 (37.0) |
| <b>D'</b>                  | 35.9 (45.3) | -            | 36.9 (46.2) |
| <b>E'</b>                  | (36.2)      | (37.9)       | (40.0)      |
| <b>F'</b>                  | -           | (38.6)       | 30.3 (36.0) |

The lowest energy possibility (C') is highlighted.

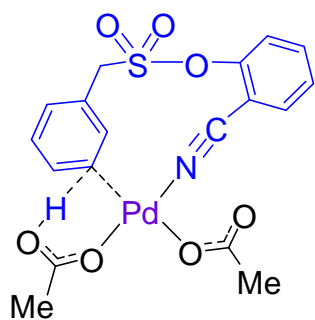

*meta*-(A')

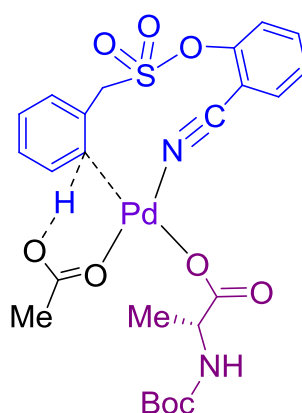

*meta*-(B')

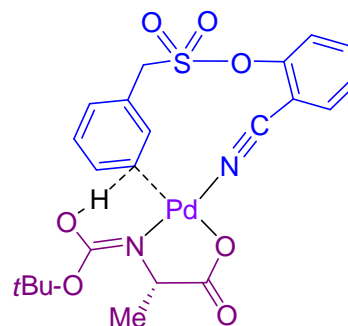

*meta*-C' [4'-5']<sup>‡</sup>

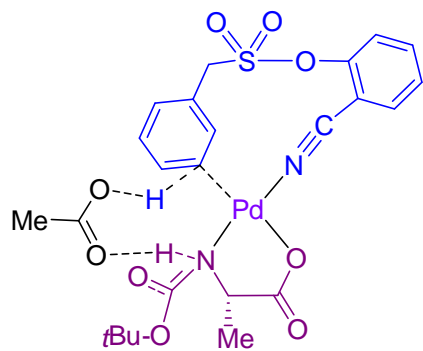

*meta*-(D')

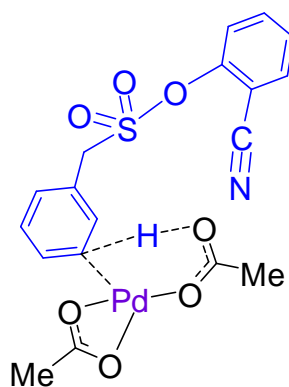

*meta*-(E')

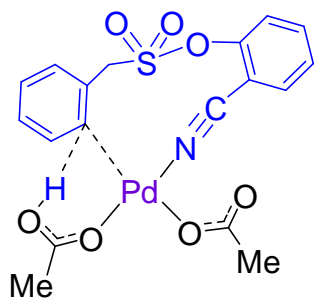

*ortho*-(A')

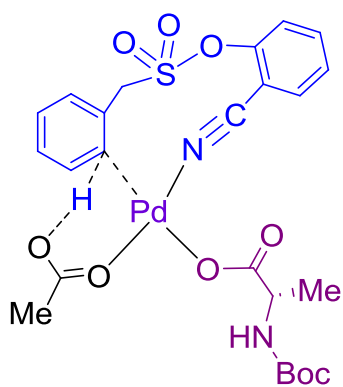

*ortho*-(B')

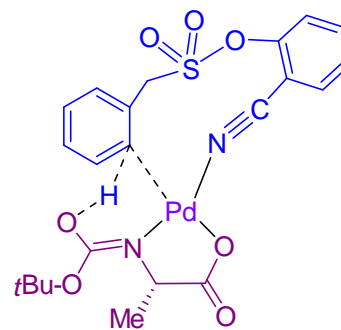

*ortho*-(C')

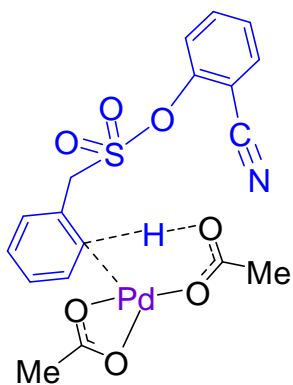

*ortho*-(E')

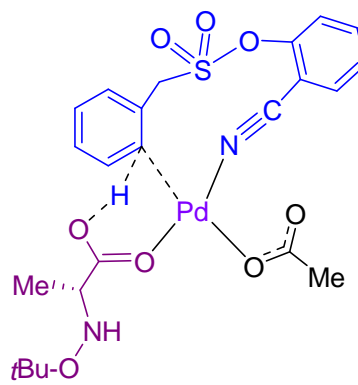

*ortho*-(F')

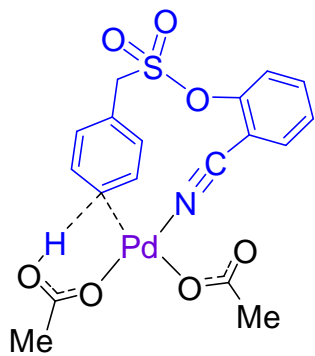

*para*-(A')

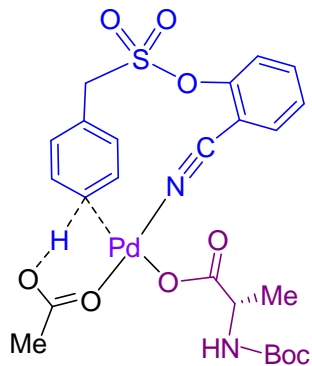

*para*-(B')

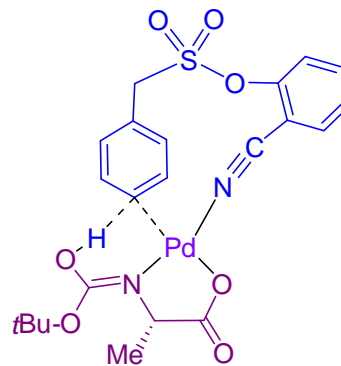

*para*-(C')

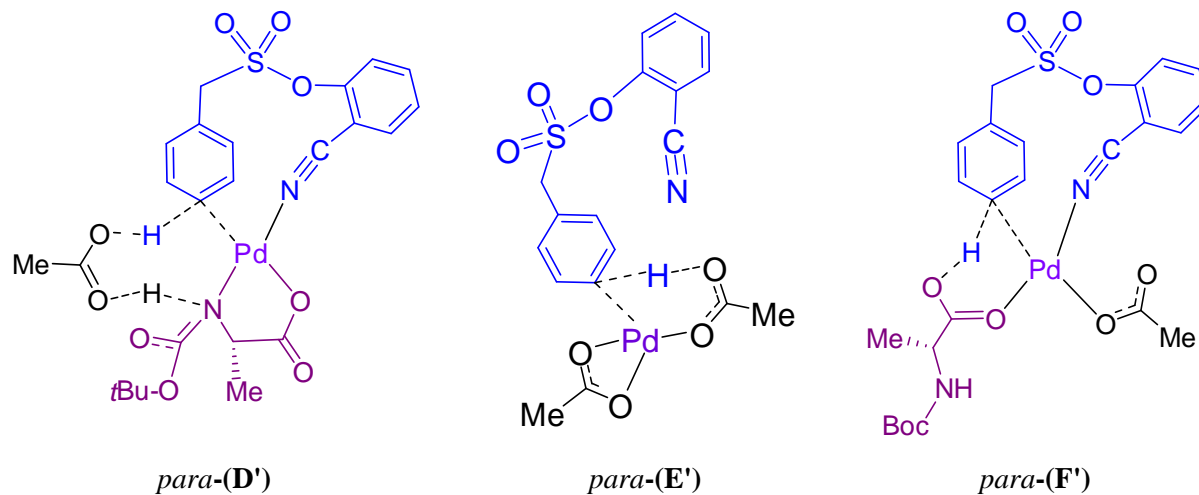

**Figure S12:** Different possibilities for the C-H bond activation transition states at the *meta*, *ortho* and *para* positions obtained at the  $\text{SMD}_{(\epsilon=16.7)}/\text{M06}/6\text{-}31\text{G}^{**}$  level of theory.

### (5) Reductive Elimination

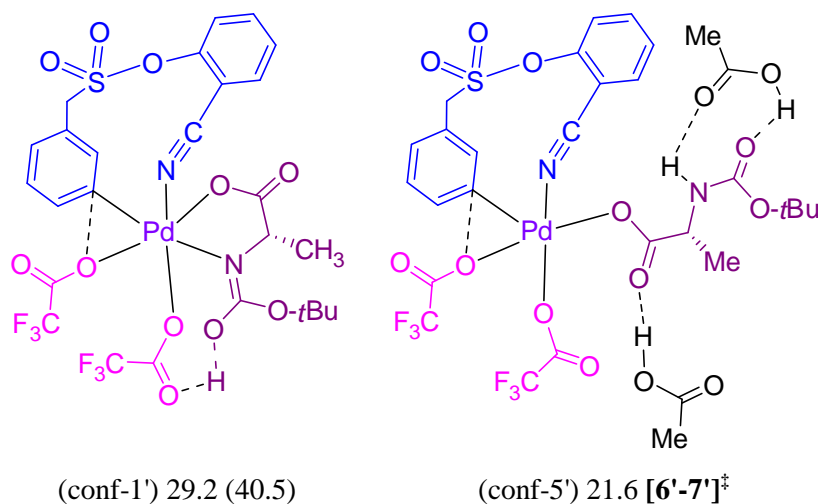

**Figure S13:** Different possibilities for the reductive elimination transition states for the *meta* product at the  $\text{SMD}_{(\epsilon=16.7)}/\text{M06}/6\text{-}31\text{G}^{**}$  Level of Theory. The values in parenthesis are at the  $\text{M06}/6\text{-}31\text{G}^{**}$  level of theory.

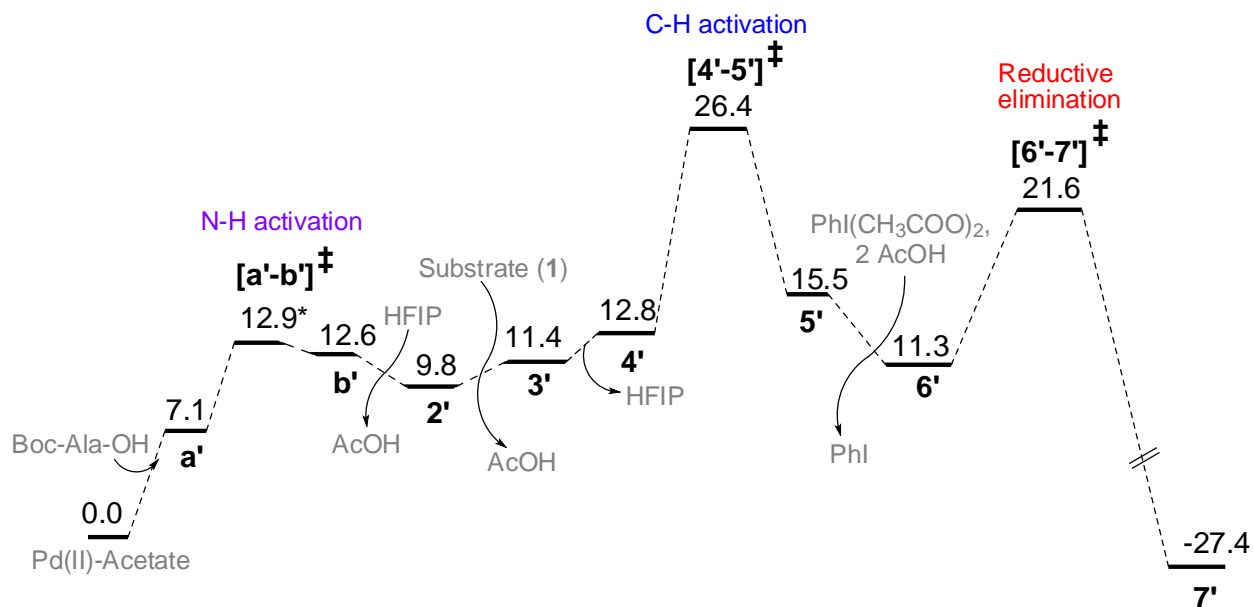

## IX. Hydrolysis of Trifluoroacetoxy and Acetoxy Products

(a) Mechanism of acid-catalyzed hydrolysis of acetate/trifluoroacetate (R=CF<sub>3</sub>/CH<sub>3</sub>)

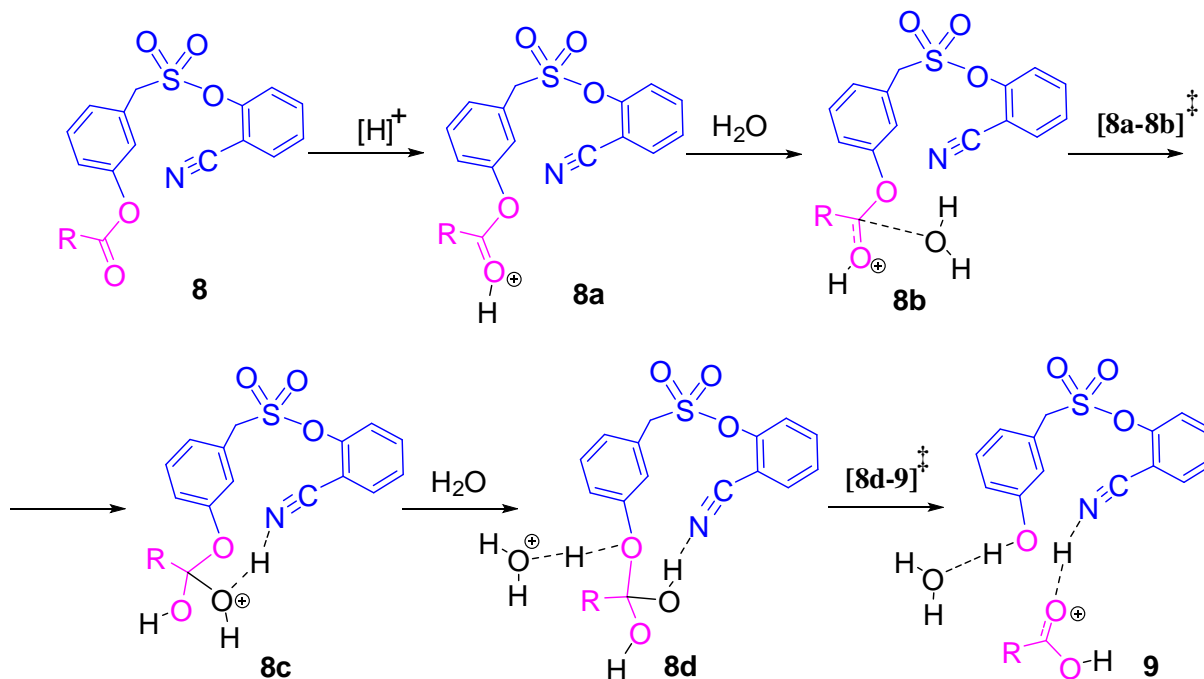

(b) comparison of hydrolysis of trifluoroacetylated and acetylated products

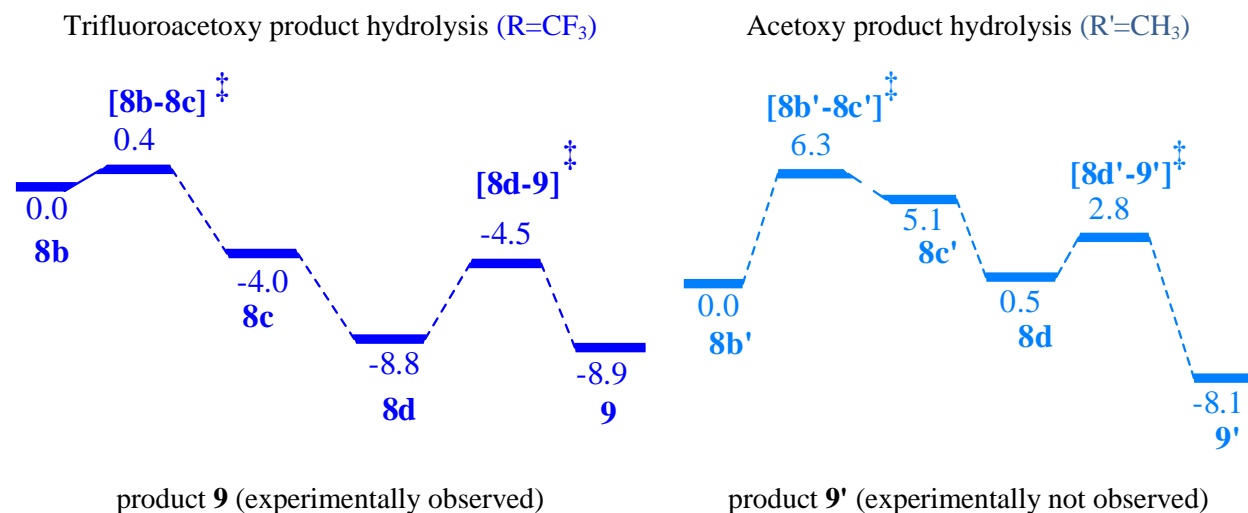

**Figure S15:** (a) Mechanism of acid-catalyzed hydrolysis and (b) Free energy profile for the hydrolysis of trifluoroacetylation and acetylation at the  $SMD_{(\epsilon=16.7)}/M06/6-31G^{**}$  level of theory.

### XIX. Comparison of *meta*, *ortho*, and *para* C-H activation transition states leading to hydroxylated product with N-For-Gly as the ligand by using activation strain analysis

$$E_{act} = E_{interaction(i)} + E_{distortion(d)}$$

f1 = Pd-ligand and f2 = Substrate

$$E_d = \{(E_{f1(TS)} + E_{f2(TS)}) - (E_{f1} + E_{f2})\}$$

$$E_i = \{(E_{(TS)}) - (E_{f1(TS)} + E_{f2(TS)})\}$$



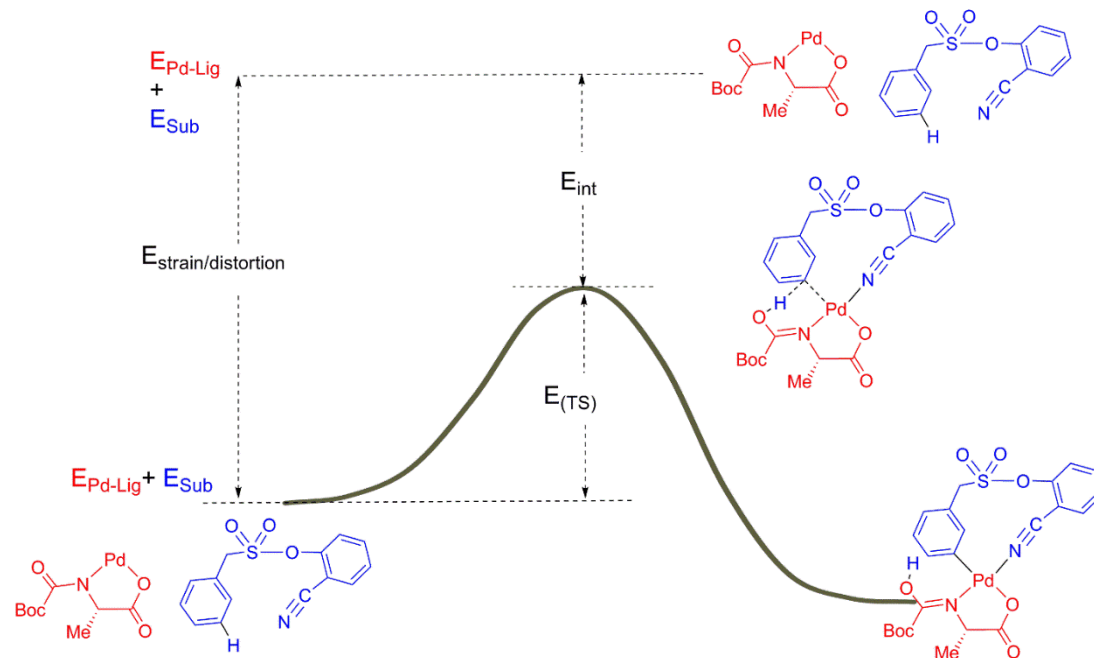

**Figure S16.** Illustration of distortion and interaction energies within the *Activation Strain Model* for the lowest energy C-H activation transition states

**Table S22:** Computed Relative Distortion Energies in each Fragment, Total Relative Distortion Energies ( $\Delta E_d^\ddagger$ ) and Relative Interaction Energies ( $\Delta E_i^\ddagger$ ) (in kcal/mol) in the C-H Activation Transition State Obtained at the  $\text{SMD}_{(e=16.7)}/\text{M06/6-31G}^{**}$  Level of Theory

| C-H activation | Distortion Energy ( $\Delta E_d$ ) | Interaction Energy ( $\Delta E_i$ ) | Activation Energy ( $\Delta E^\ddagger = [\Delta E_d^\ddagger + \Delta E_i^\ddagger]$ ) |
|----------------|------------------------------------|-------------------------------------|-----------------------------------------------------------------------------------------|
| <i>meta</i>    | 32.1                               | -59.9                               | -27.8                                                                                   |
| <i>ortho</i>   | 35.2                               | -58.3                               | -23.1                                                                                   |
| <i>para</i>    | 32.0                               | -58.9                               | -26.9                                                                                   |

## VI. Natural Bond Orbital Analysis

| $[4-5]^\ddagger$ |              |             |
|------------------|--------------|-------------|
| <i>meta</i>      | <i>ortho</i> | <i>Para</i> |
|                  |              |             |

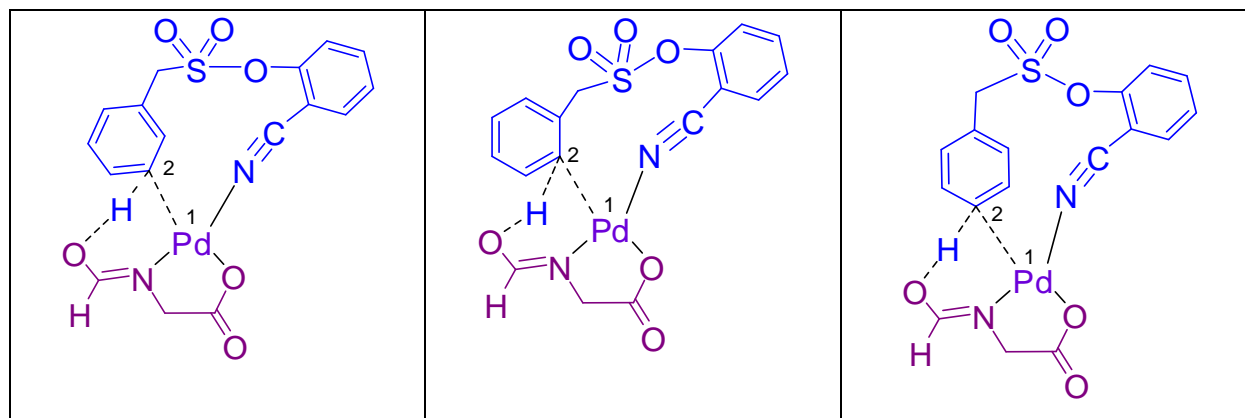

**Figure S17:** *meta*, *ortho* and *para* C-H bond activation transition states at the SMD<sub>( $\epsilon=16.7$ )</sub>/M06/6-31G\*\* level of theory (atom numbering used in NBO is shown).

### Summary of Natural Population Analysis

**Table S23:** Natural Charges

| C-H activation | Pd1     | C2       |
|----------------|---------|----------|
| <i>meta</i>    | 0.51594 | -0.41797 |
| <i>ortho</i>   | 0.50341 | -0.40361 |
| <i>para</i>    | 0.51560 | -0.41358 |

**Table S24:** Natural Bond Orbitals, its Occupancy and Orbital energies

| C-H_activation | Natural Bond Orbitals | Occupancy | Energy   |
|----------------|-----------------------|-----------|----------|
| <i>meta</i>    | BD(1) Pd 1 - C 2      | 1.65521   | -0.34506 |
| <i>ortho</i>   | BD(1) Pd 1 - C 2      | 1.23779   | 0.04631  |
| <i>para</i>    | BD(1) Pd 1 - C 2      | 1.27785   | 0.02805  |

We find that the bonding orbital between Pd1 and C2 has the highest occupancy or population in case of *meta*- C-H activation.

## XX. References:

(1) Frisch, M. J.; Trucks, G. W.; Schlegel, H. B.; Scuseria, G. E.; Robb, M. A.; Cheeseman, J. R.; Scalmani, G.; Barone, V.; Mennucci, B.; Petersson, G. A.; Nakatsuji, H.; Caricato, M.; Li, X.; Hratchian, H. P.; Izmaylov, A. F.; Bloino, J.; Zheng, G.; Sonnenberg, J. L.; Hada, M.; Ehara, M.; Toyota, K.; Fukuda, R.; Hasegawa, J.; Ishida, M.; Nakajima, T.; Honda, Y.; Kitao, O.; Nakai, H.; Vreven, T.; Montgomery, J. A., Jr.; Peralta, J. E.; Ogliaro, F.; Bearpark, M.; Heyd, J. J.; Brothers, E.; Kudin, K. N.; Staroverov, V. N.; Kobayashi, R.; Normand, J.; Raghavachari, K.; Rendell, A.; Burant, J. C.; Iyengar, S. S.; Tomasi, J.; Cossi, M.; Rega, N.; Millam, N. J.; Klene, M.; Knox, J. E.; Cross, J. B.; Bakken, V.; Adamo, C.; Jaramillo, J.; Gomperts, R.; Stratmann, R. E.; Yazyev, O.; Austin, A. J.; Cammi, R.; Pomelli, C.; Ochterski, J. W.; Martin, R. L.; Morokuma, K.; Zakrzewski, V. G.; Voth, G. A.; Salvador, P.; Dannenberg, J. J.; Dapprich, S.; Daniels, A. D.; Farkas, Ö.; Foresman, J. B.; Ortiz, J. V.; Cioslowski, J.; Fox, D. J. Gaussian 09, Revision A.02; Gaussian, Inc.: Wallingford, CT, 2013.

(2) Zhao, Y.; Truhlar, D. G. *Theor. Chem. Acc.* **2008**, *120*, 215.

(3) Hay, P. J.; Wadt, W. R. *J. Chem. Phys.* **1985**, *82*, 299.

- (4) (a) Gonzalez, C.; Schlegel, H. B. *J. Chem. Phys.* **1989**, *90*, 2154. (b) Gonzalez, C.; Schlegel, H. B. *J. Phys. Chem.* **1990**, *94*, 5523.
- (5) Marenich, A. V.; Cramer, C. J.; Truhlar, D. G. *J. Phys. Chem. B.* **2009**, *113*, 6378.
- (6) Legault, C. Y. CYLview, 1.0 b, Université de Sherbrooke, Quebec (Canada), **2009**, (<http://www.cylview.org>).
- (7) (a) Bickelhaupt, F. M. *J. Comput. Chem.* **1999**, *20*, 114. (b) Legault, C. Y.; Garcia, Y.; Merlic, C. A.; Houk, K. N. *J. Am. Chem. Soc.* **2007**, *129*, 12664. (c) Gorelsky, S. I.; Lapointe, D.; Fagnou, K. *J. Am. Chem. Soc.* **2008**, *130*, 10848.
- (8) (a) Foster, J. P.; Weinhold, F. *J. Am. Chem. Soc.* **1980**, *102*, 7211. (b) Reed, A. E.; Weinhold, F. *J. Chem. Phys.* **1983**, *78*, 4066. (c) Reed, A. E.; Weinstock, R. B.; Weinhold, F. *J. Chem. Phys.* **1985**, *83*, 735. (d) Reed, A. E.; Weinhold, F. *J. Chem. Phys.* **1985**, *83*, 1736.

## XII. NMR Characterization

### A. NMR Characterization of Substrates

#### 2-cyanophenyl phenylmethanesulfonate:

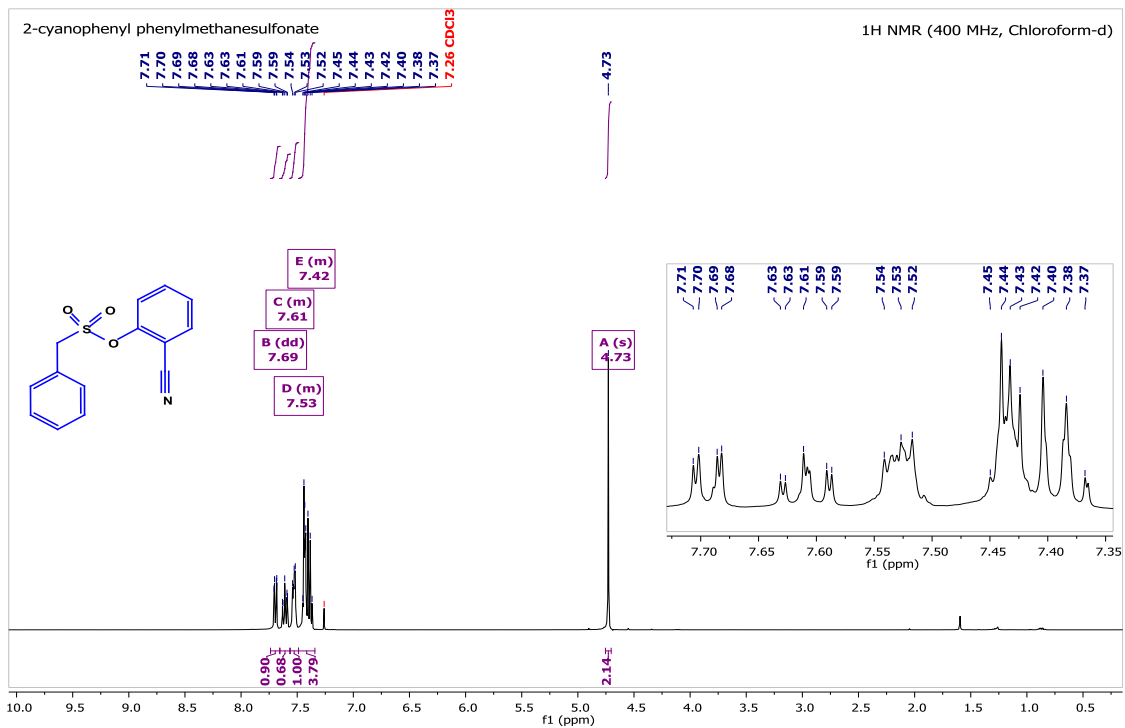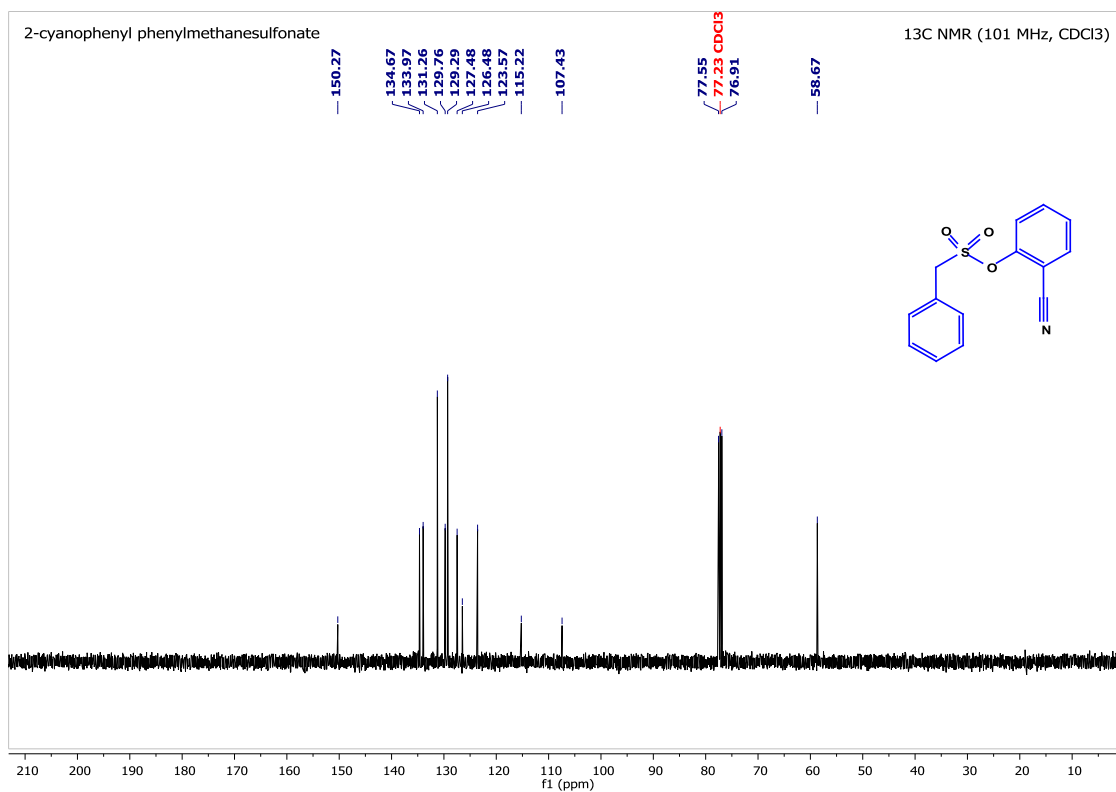

## 2-cyanophenyl (2-chlorophenyl)methanesulfonate:

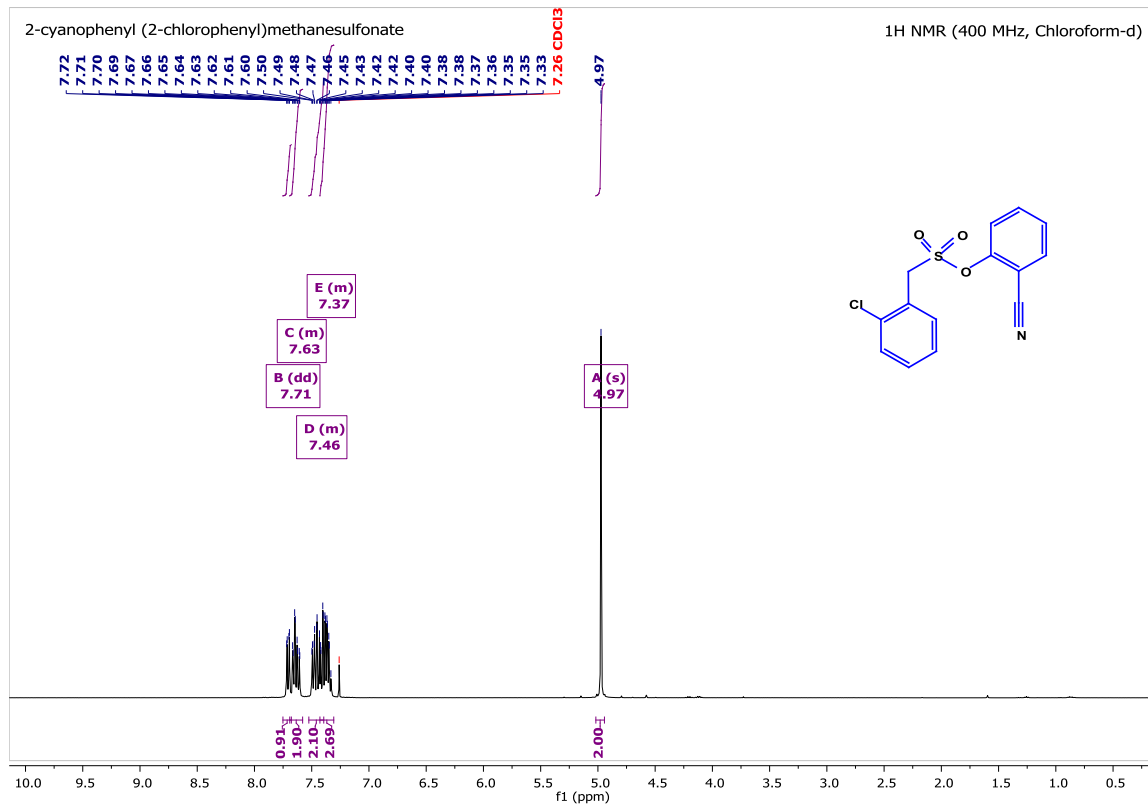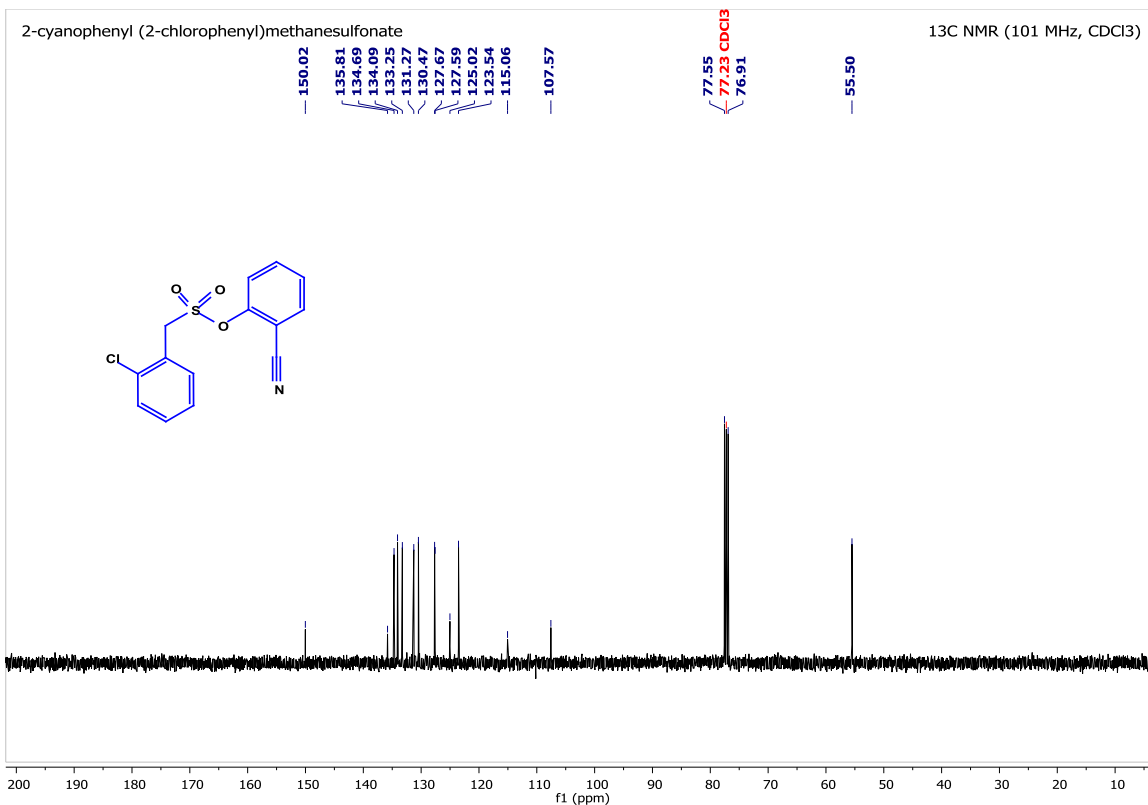

## 2-cyanophenyl (4-isopropylphenyl)methanesulfonate:

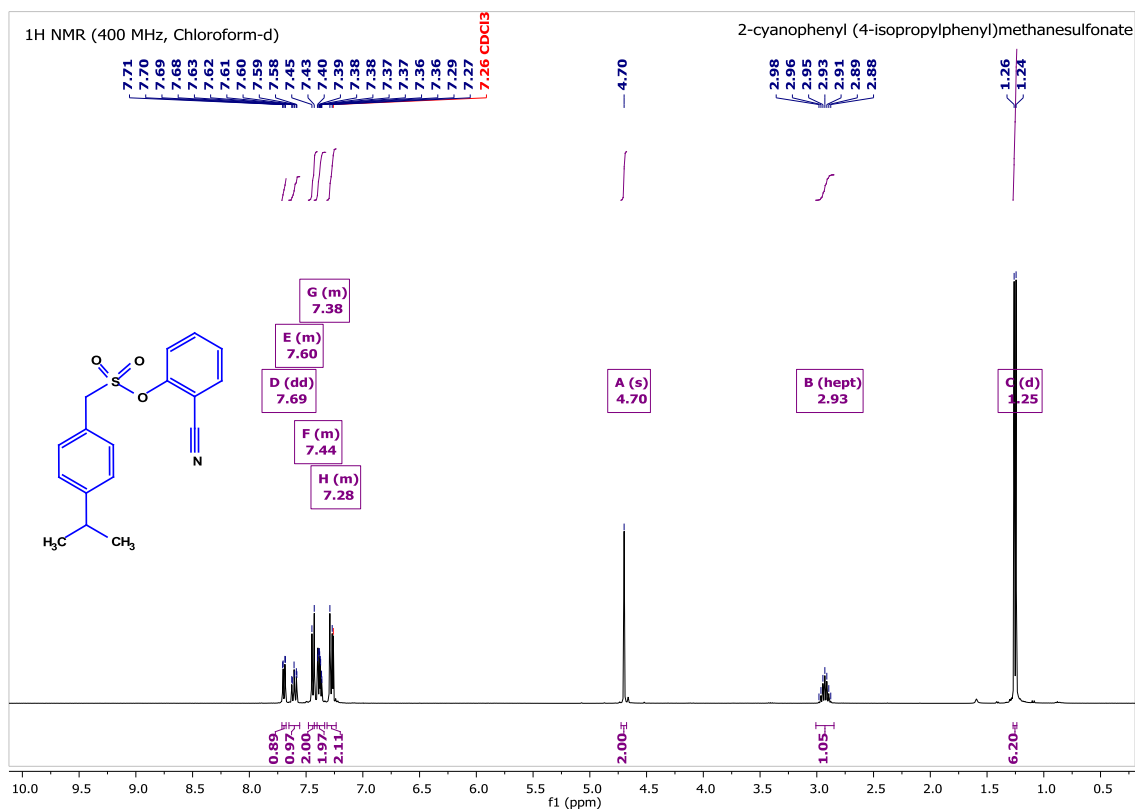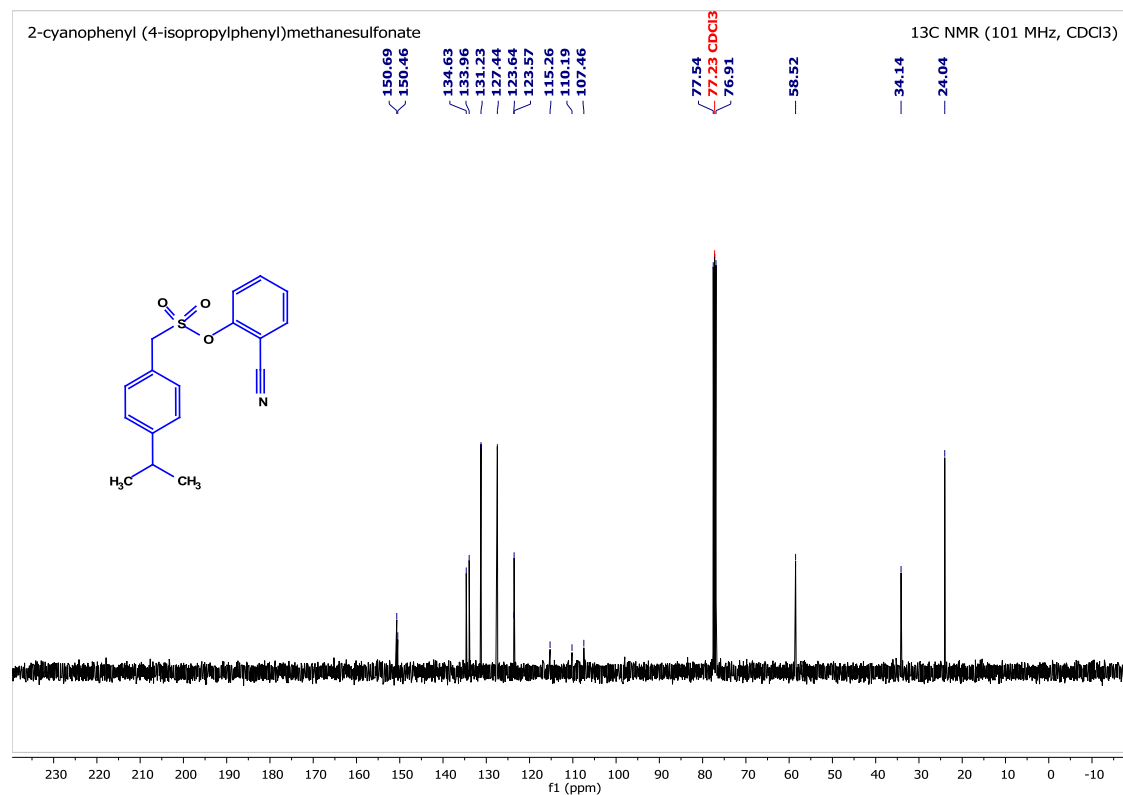

## 2-cyanophenyl (2-(trifluoromethoxy)phenyl)methanesulfonate:

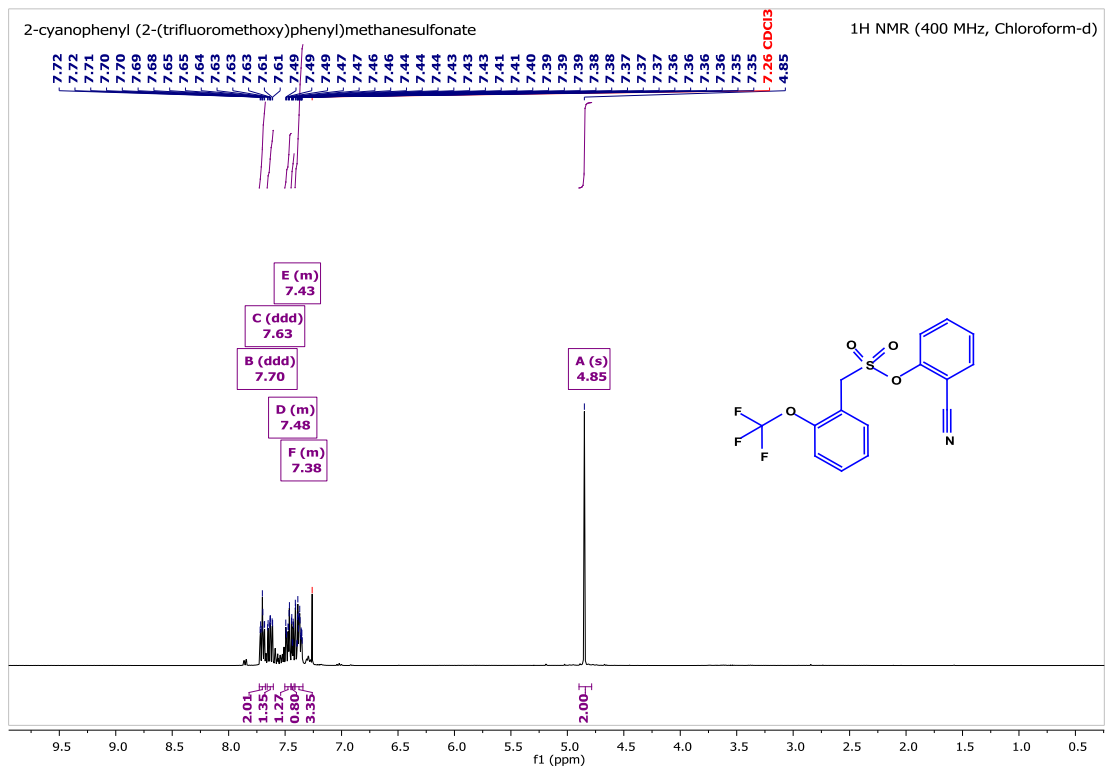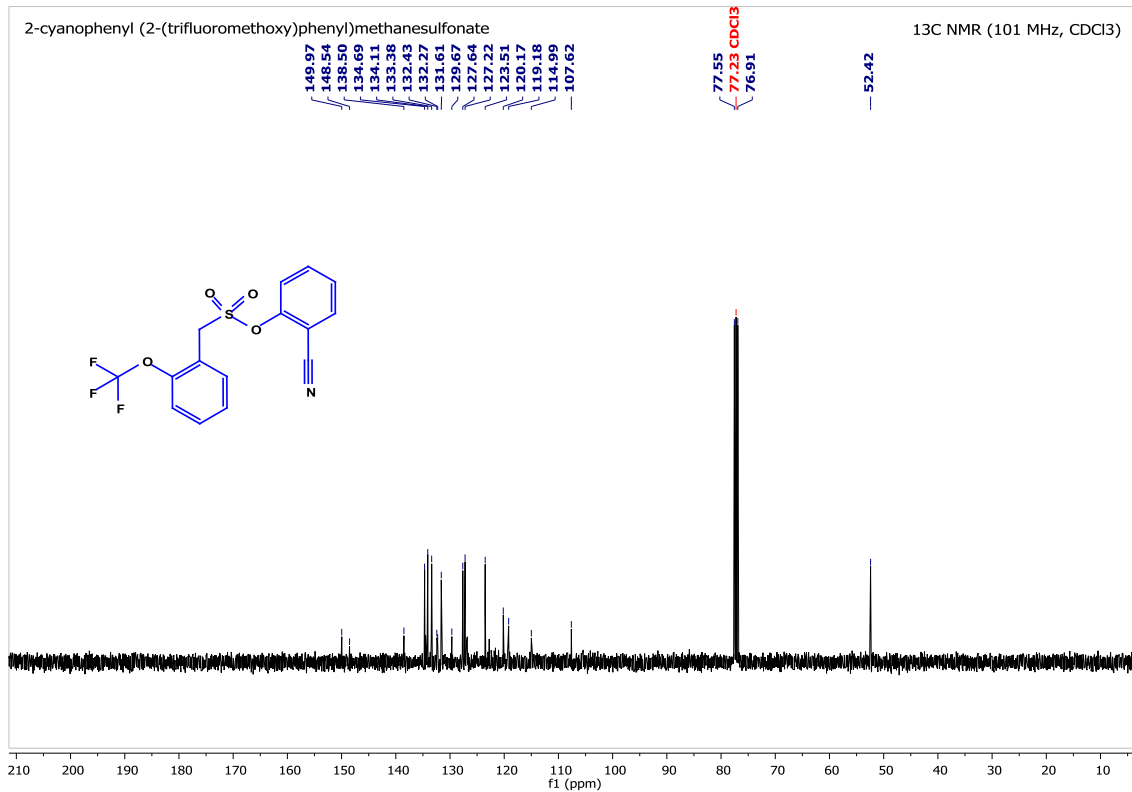

## 2-cyanophenyl (3-chlorophenyl)methanesulfonate:

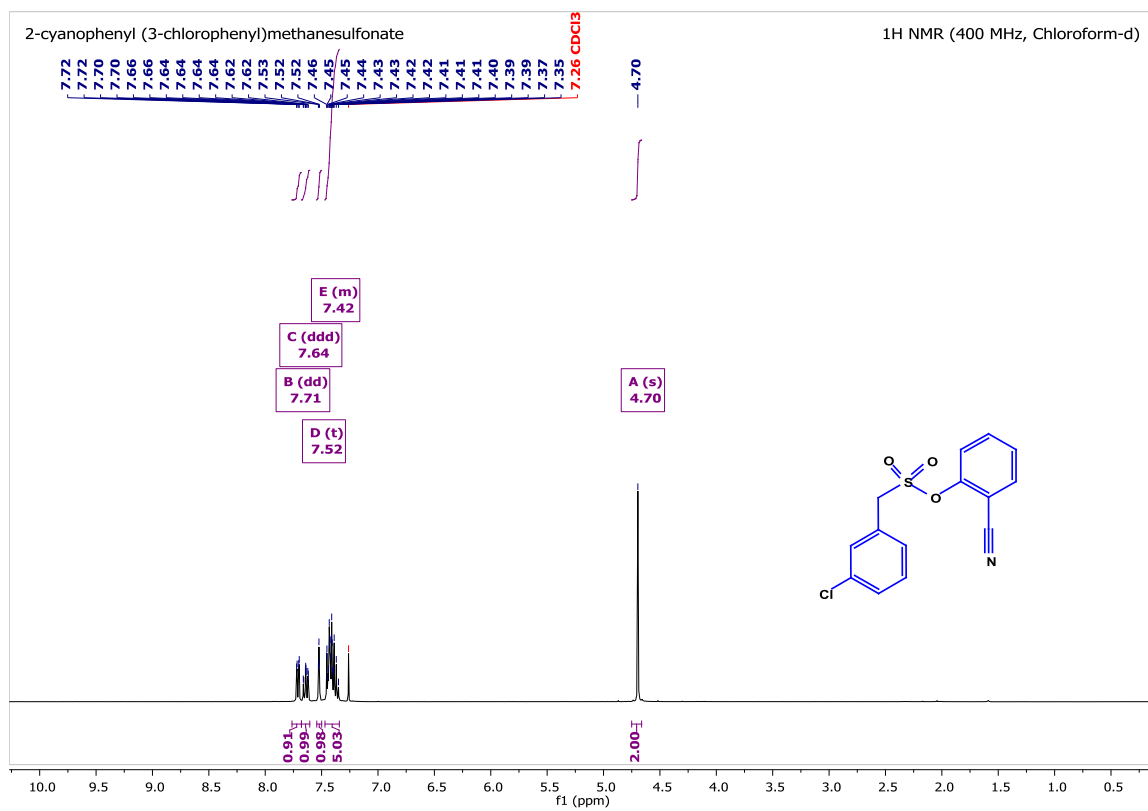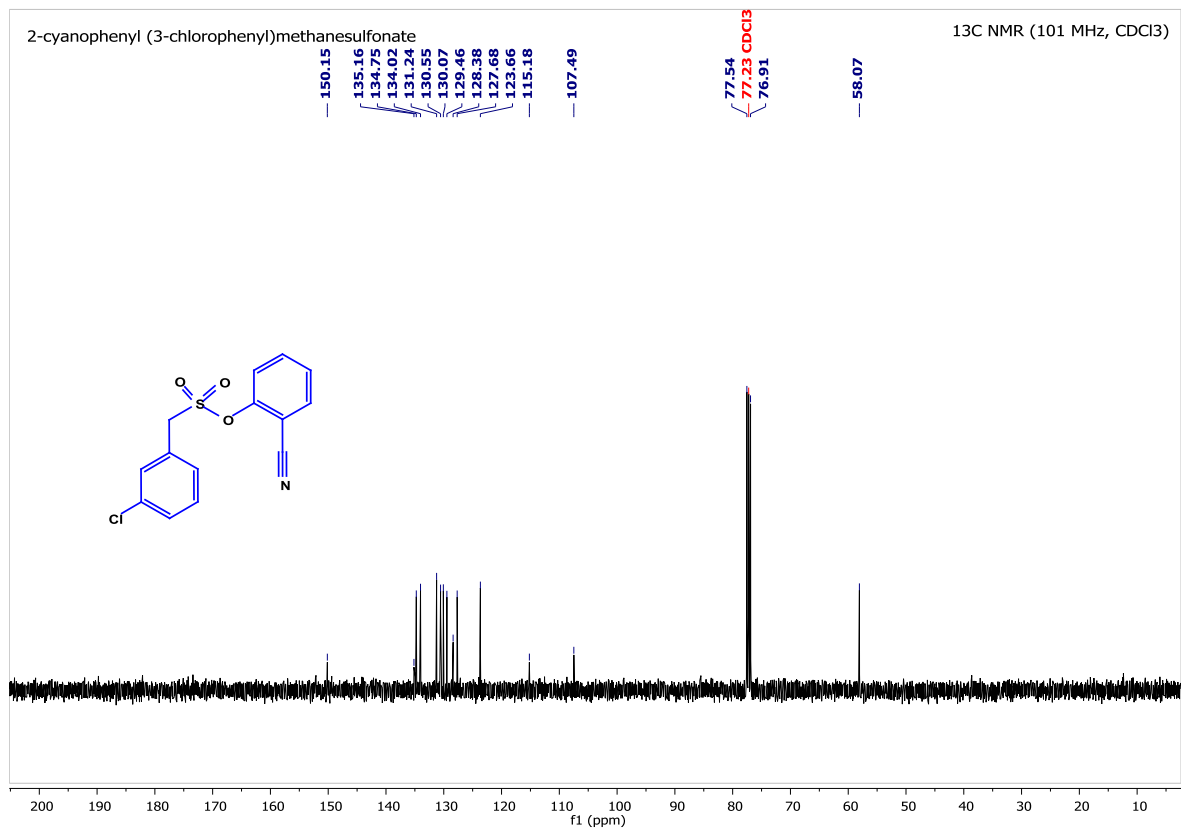



## 2-cyanophenyl (2-bromo-5-methoxyphenyl)methanesulfonate:

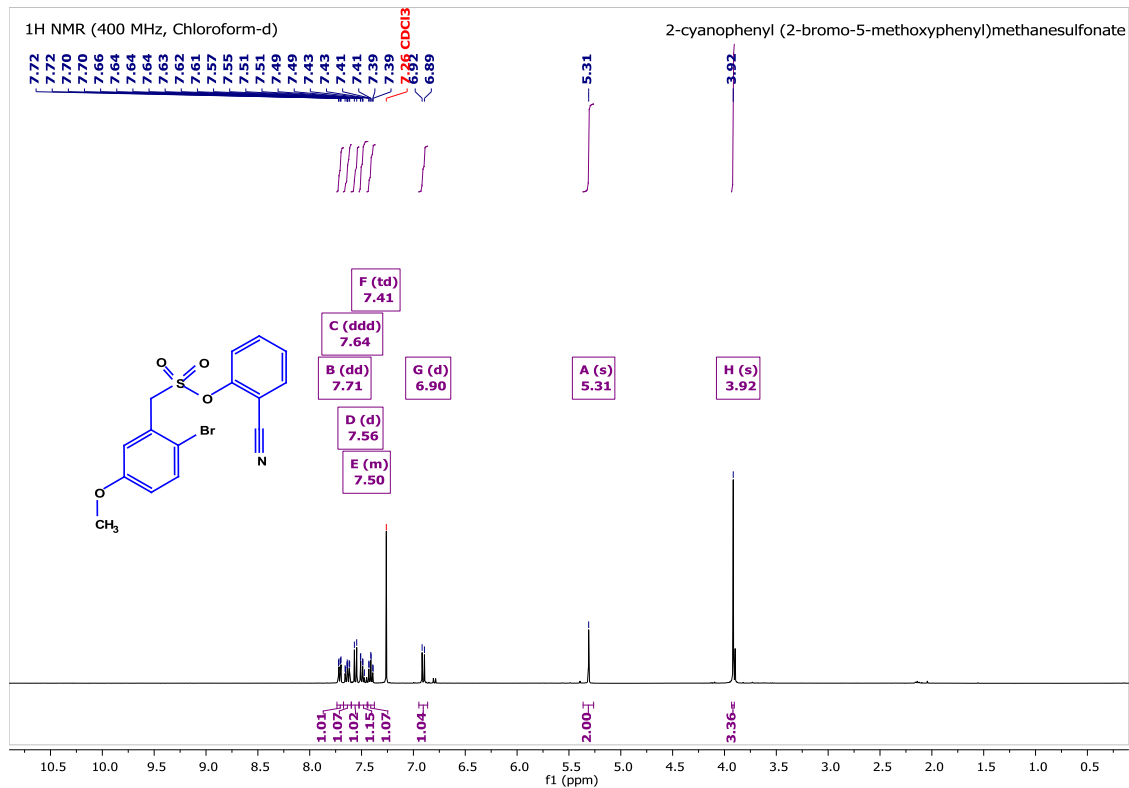

## 2-cyanophenyl m-tolylmethanesulfonate:

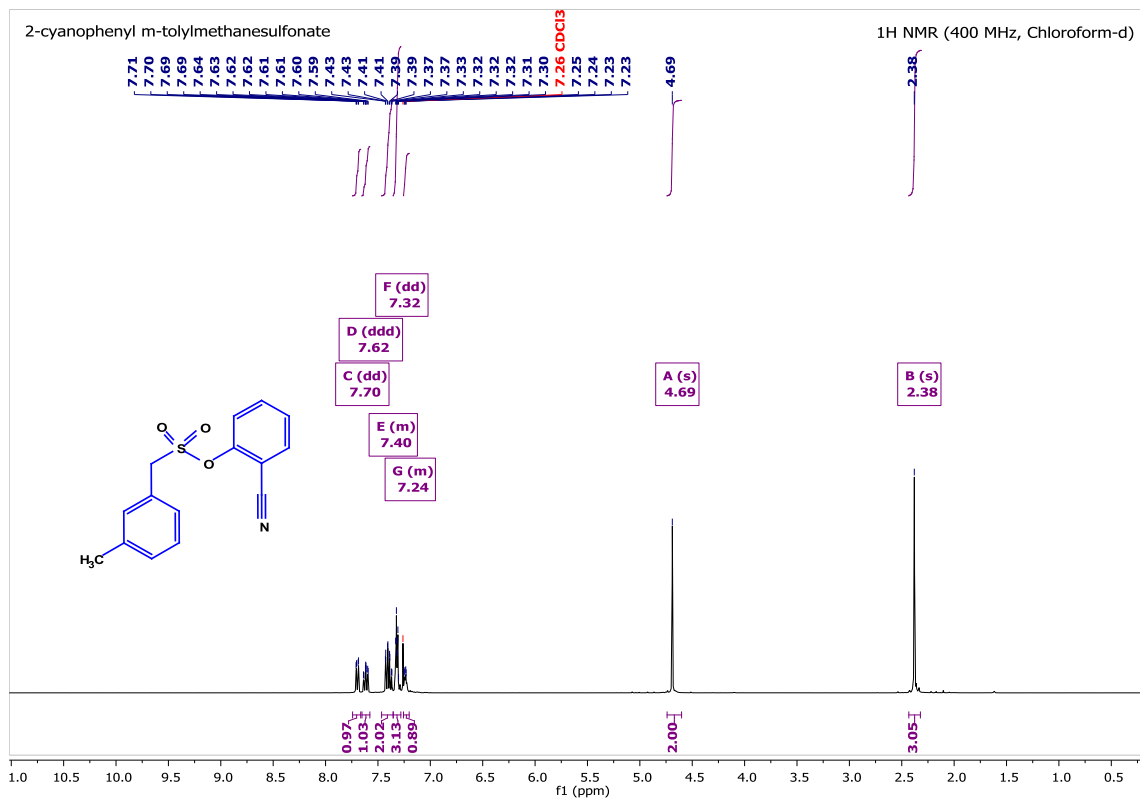

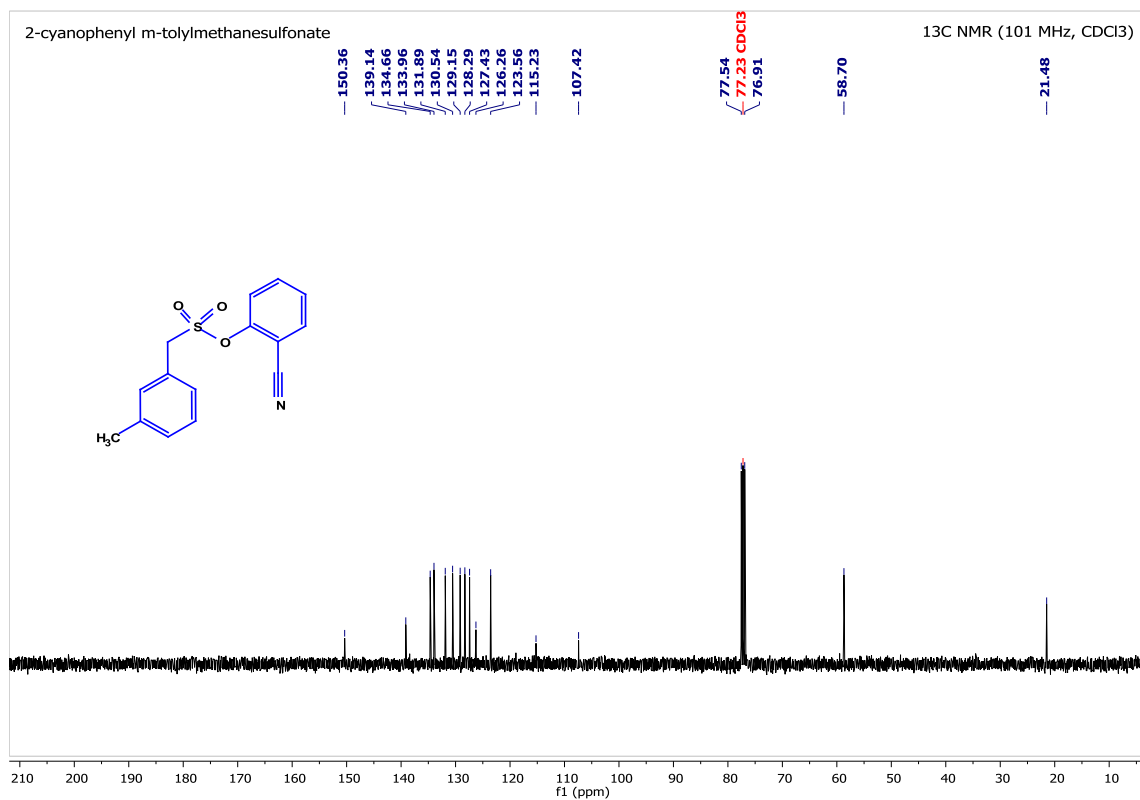

### 2-cyanophenyl (2-bromophenyl)methanesulfonate:

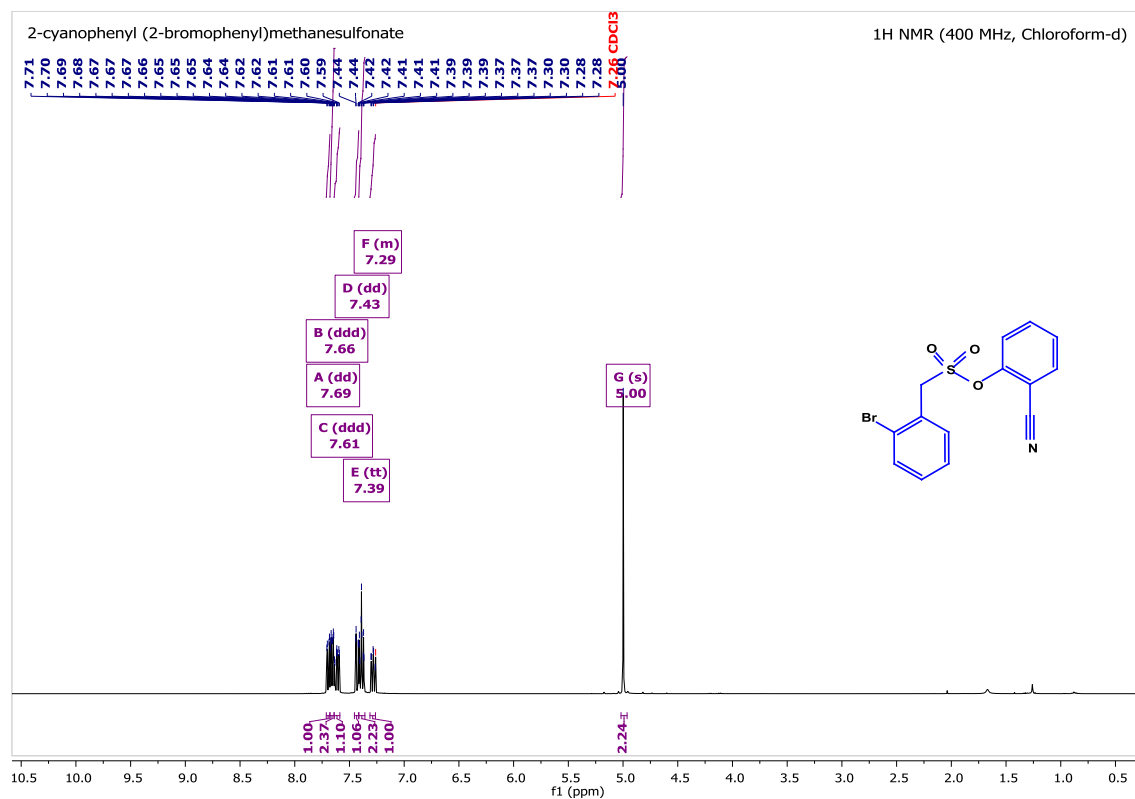

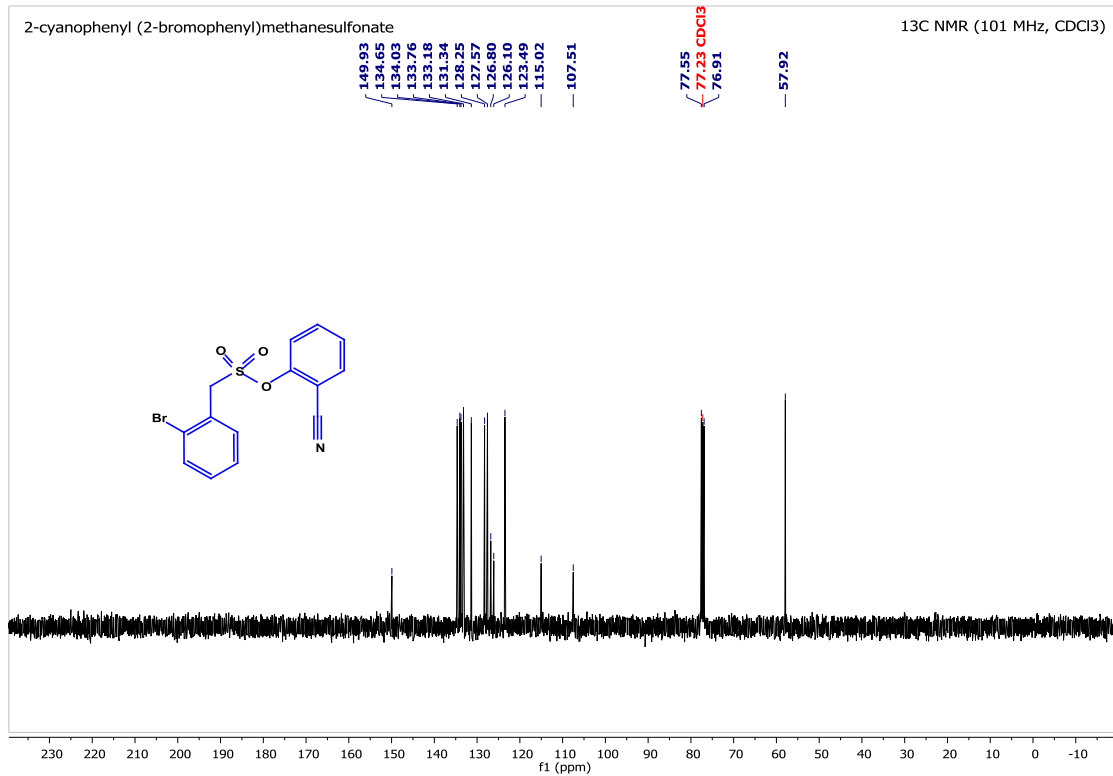

**2-cyanophenyl (2,5-difluorophenyl)methanesulfonate:**

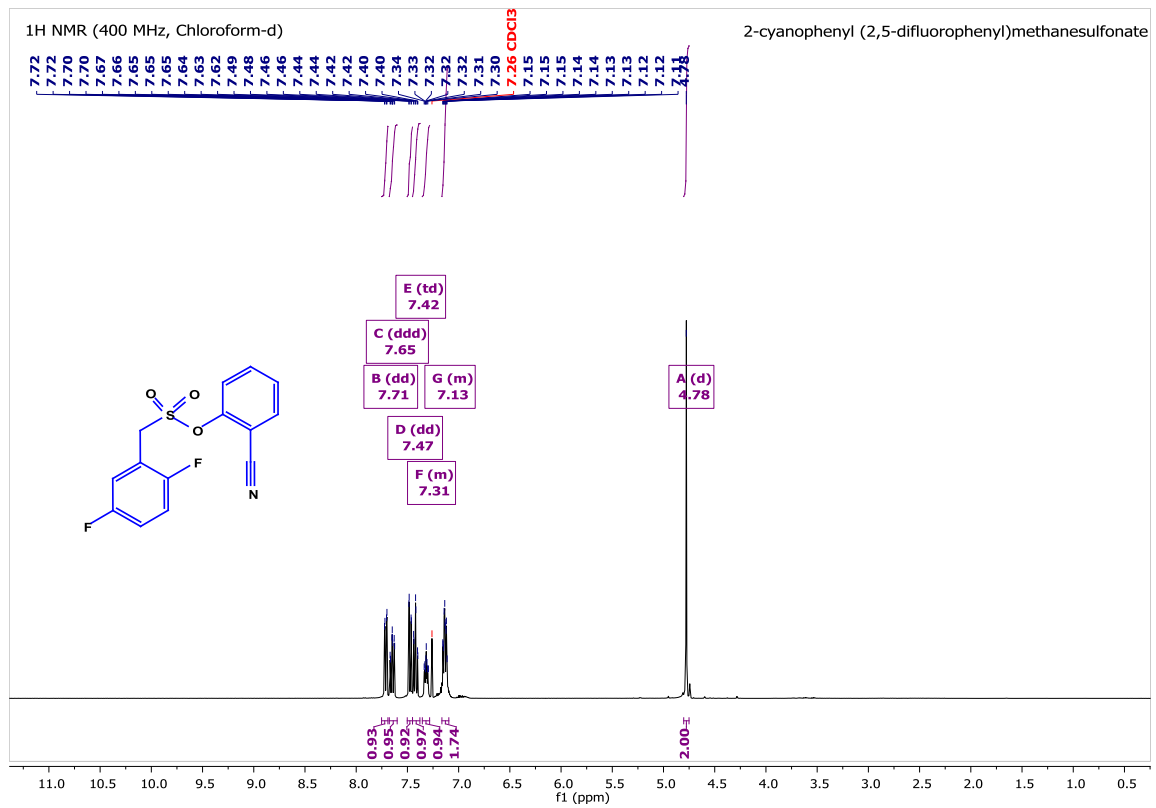

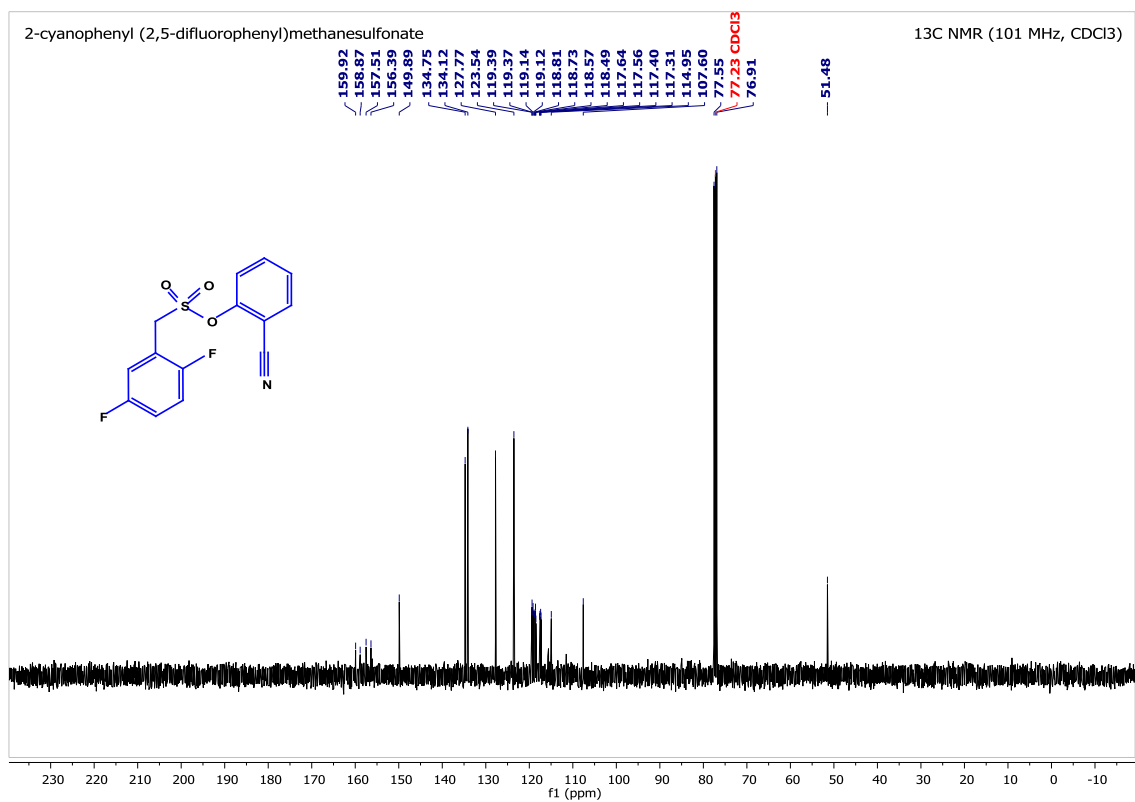

## B. NMR Characterization of the *meta*-hydroxylated compounds:

### 2-cyanophenyl (3-hydroxyphenyl)methanesulfonate (1a):

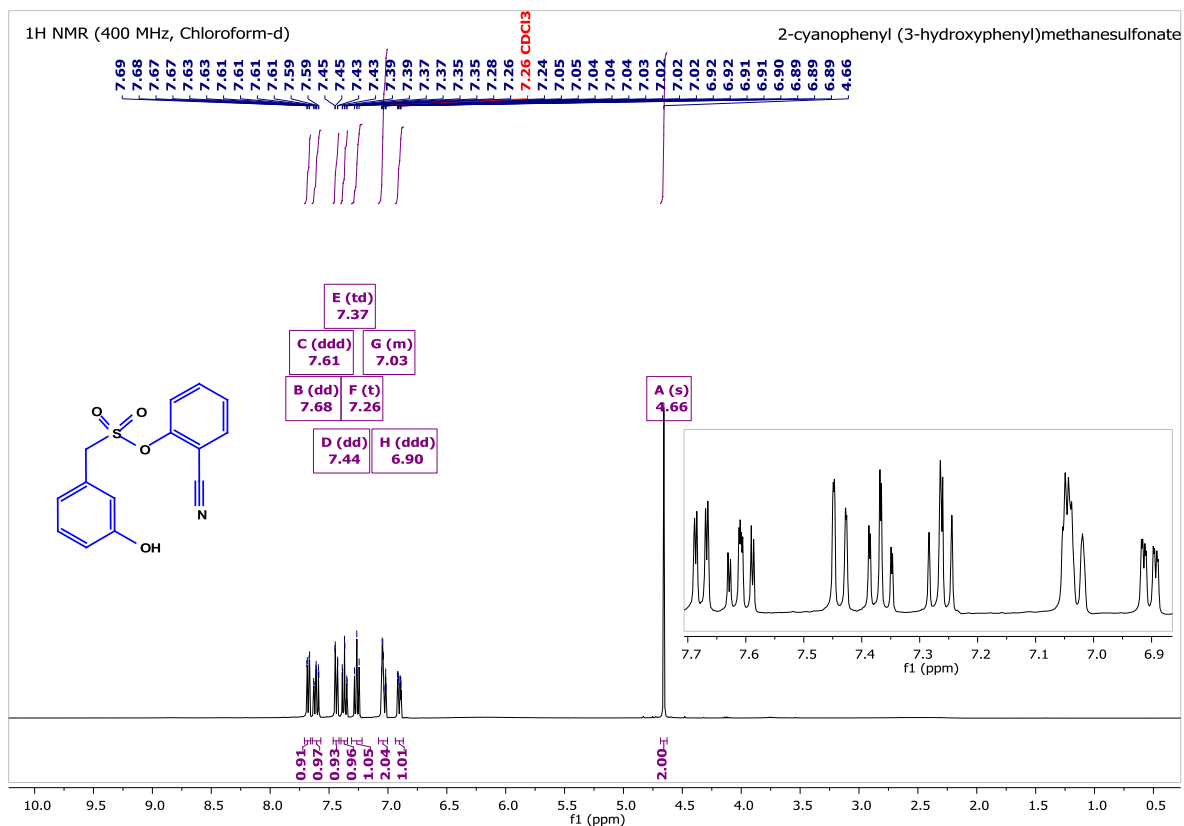

2-cyanophenyl (3-hydroxyphenyl)methanesulfonate

<sup>13</sup>C NMR (101 MHz, CDCl<sub>3</sub>)

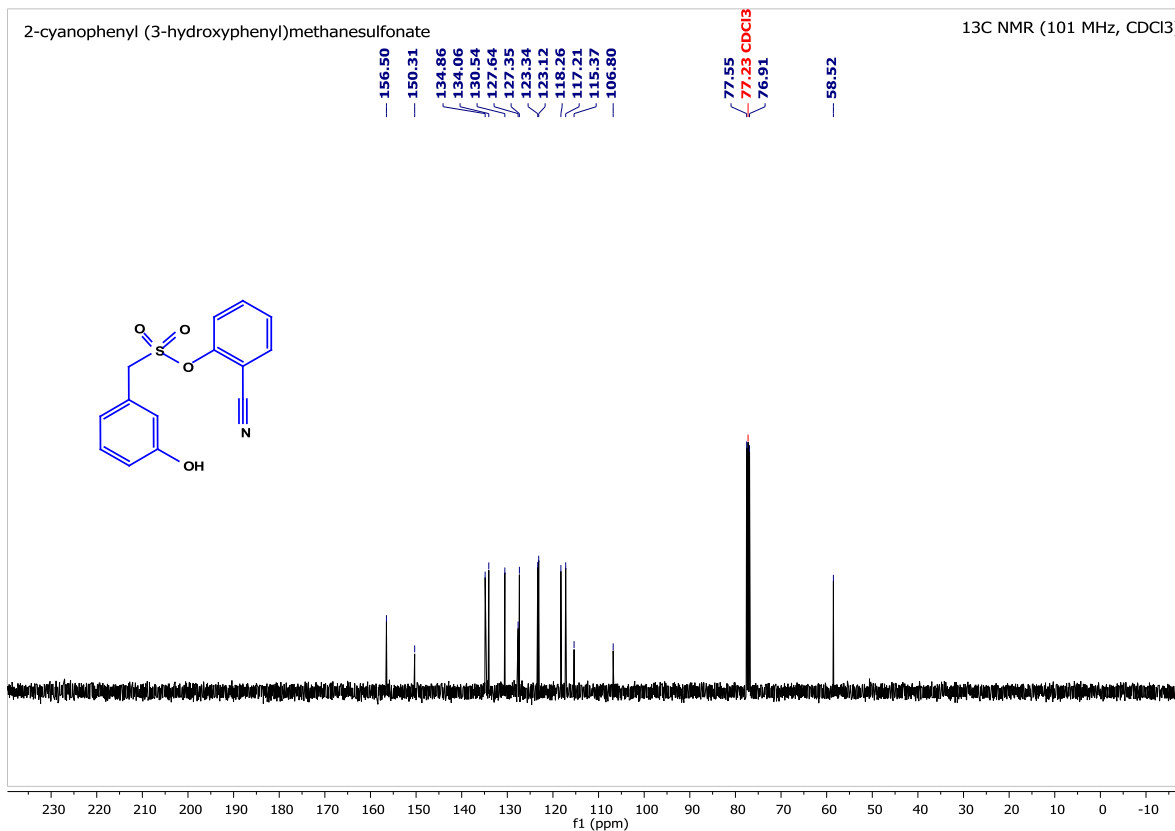

<sup>13</sup>C NMR (101 MHz, CDCl<sub>3</sub>)

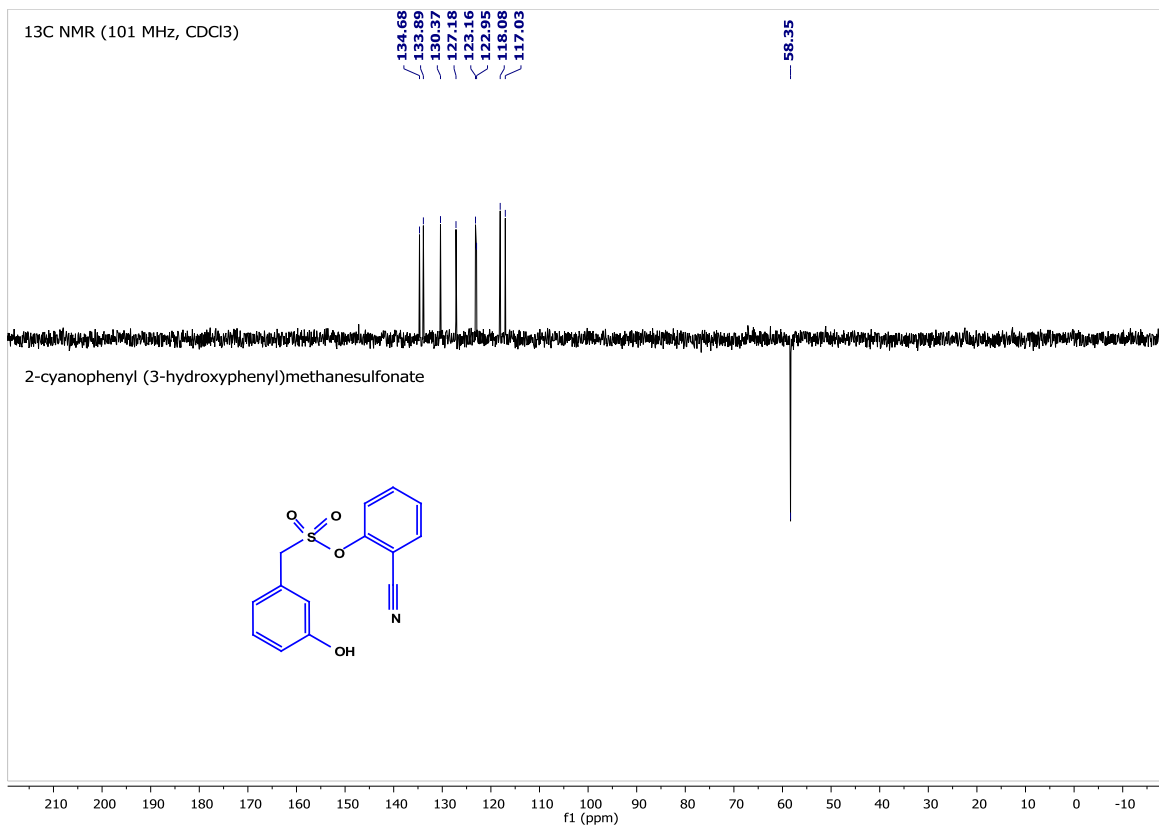

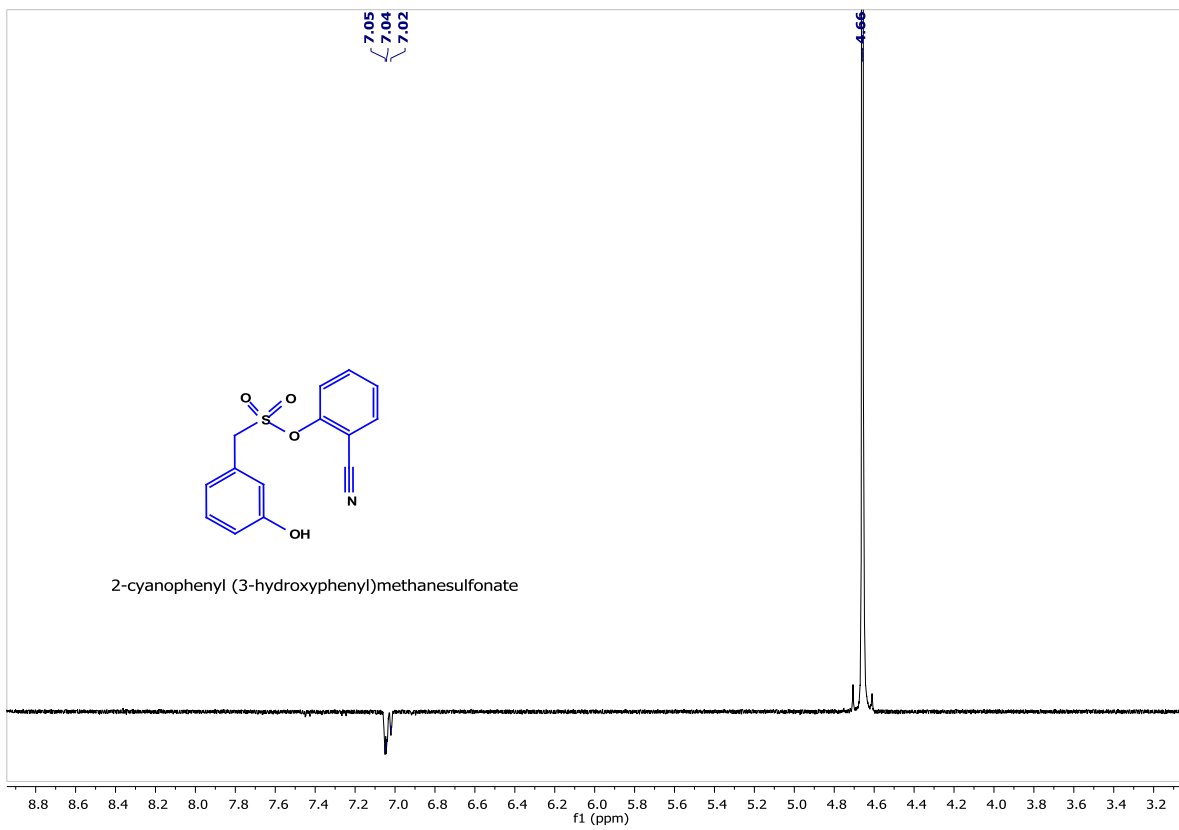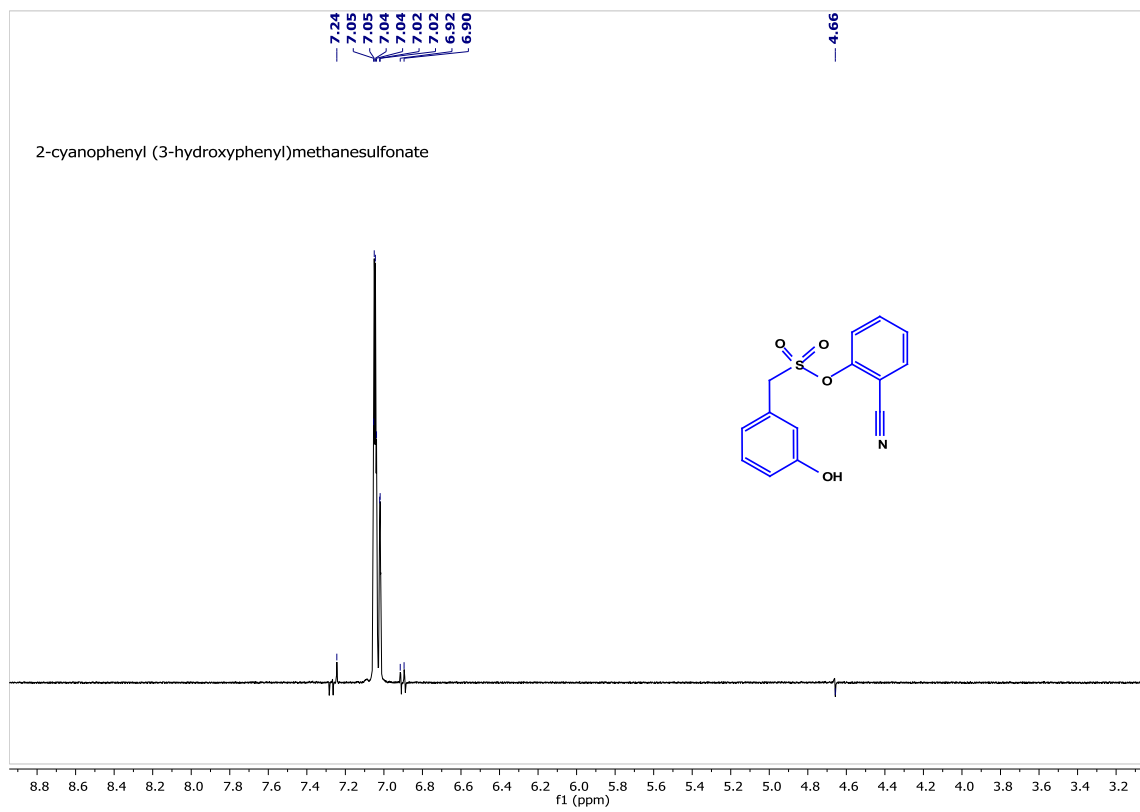

## 2-cyanophenyl (3-hydroxy-4-methylphenyl)methanesulfonate (1b):

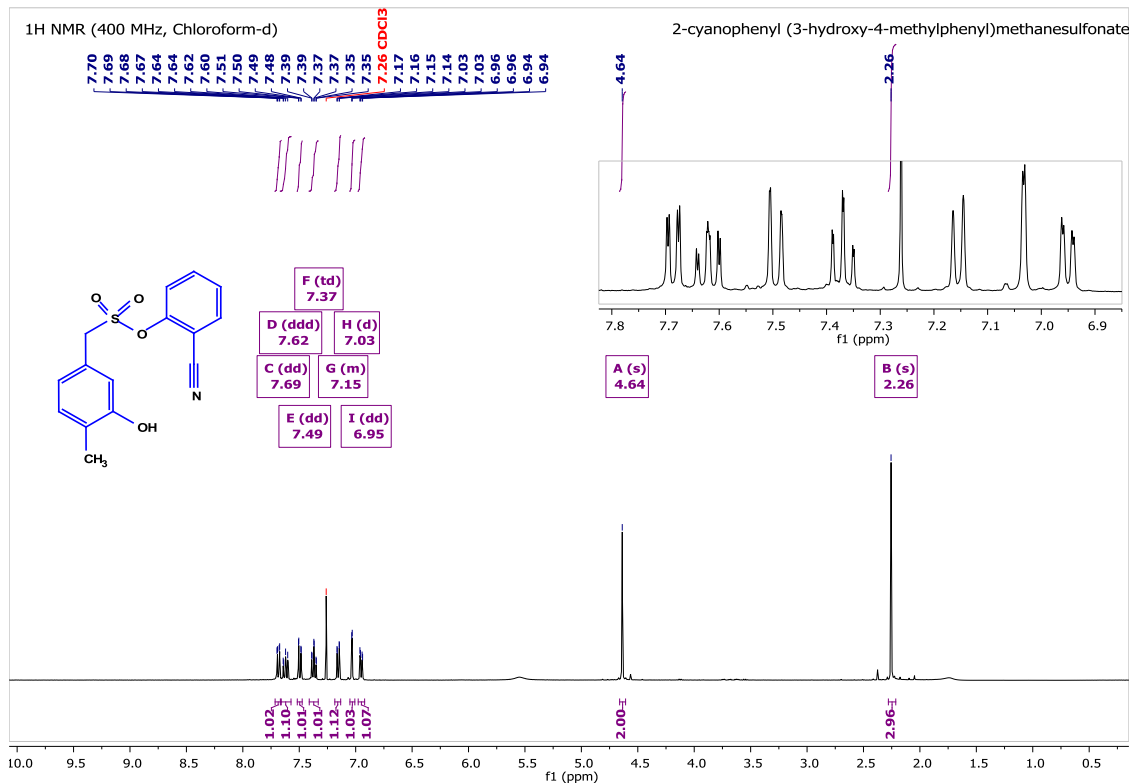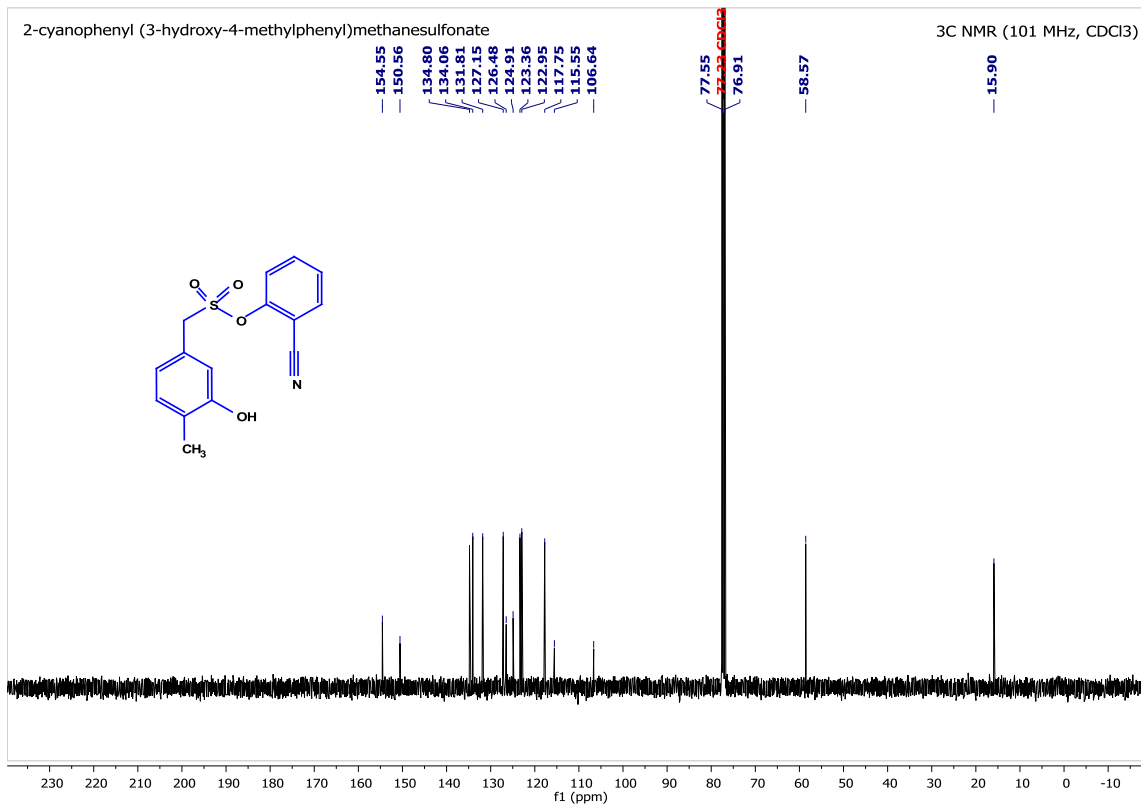

## 2-cyanophenyl (3-hydroxy-4-isopropylphenyl)methanesulfonate (1c):

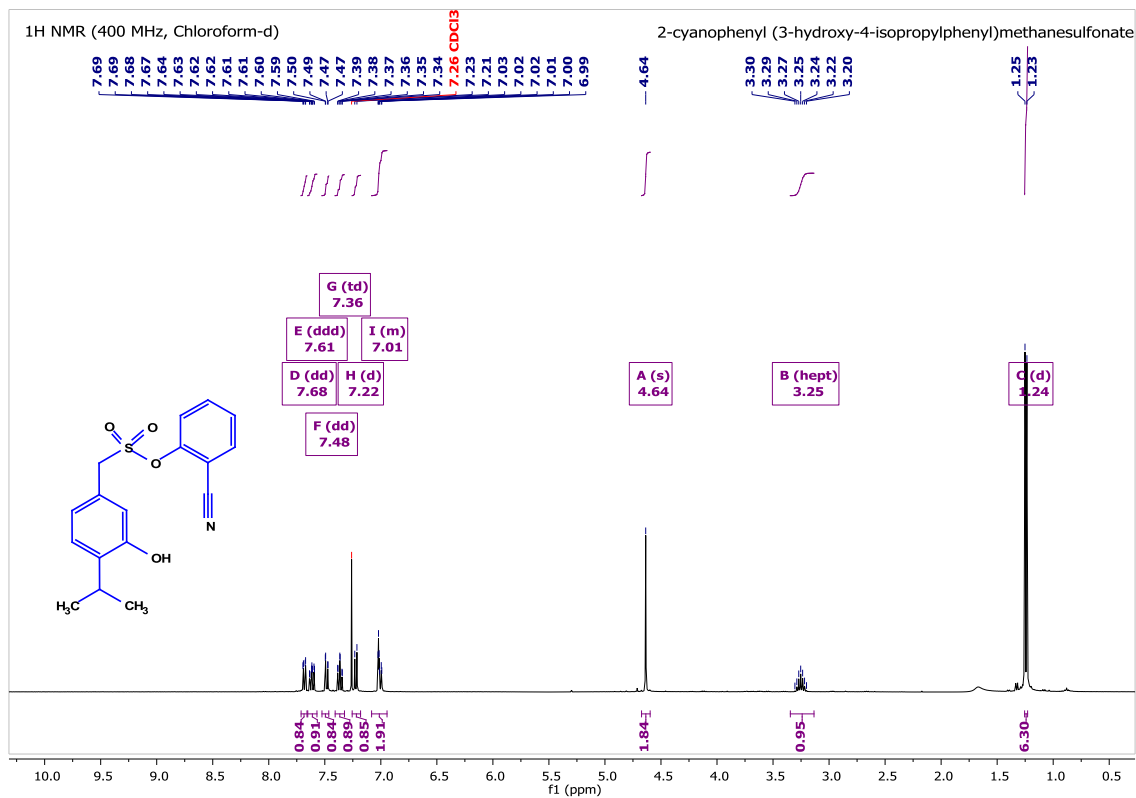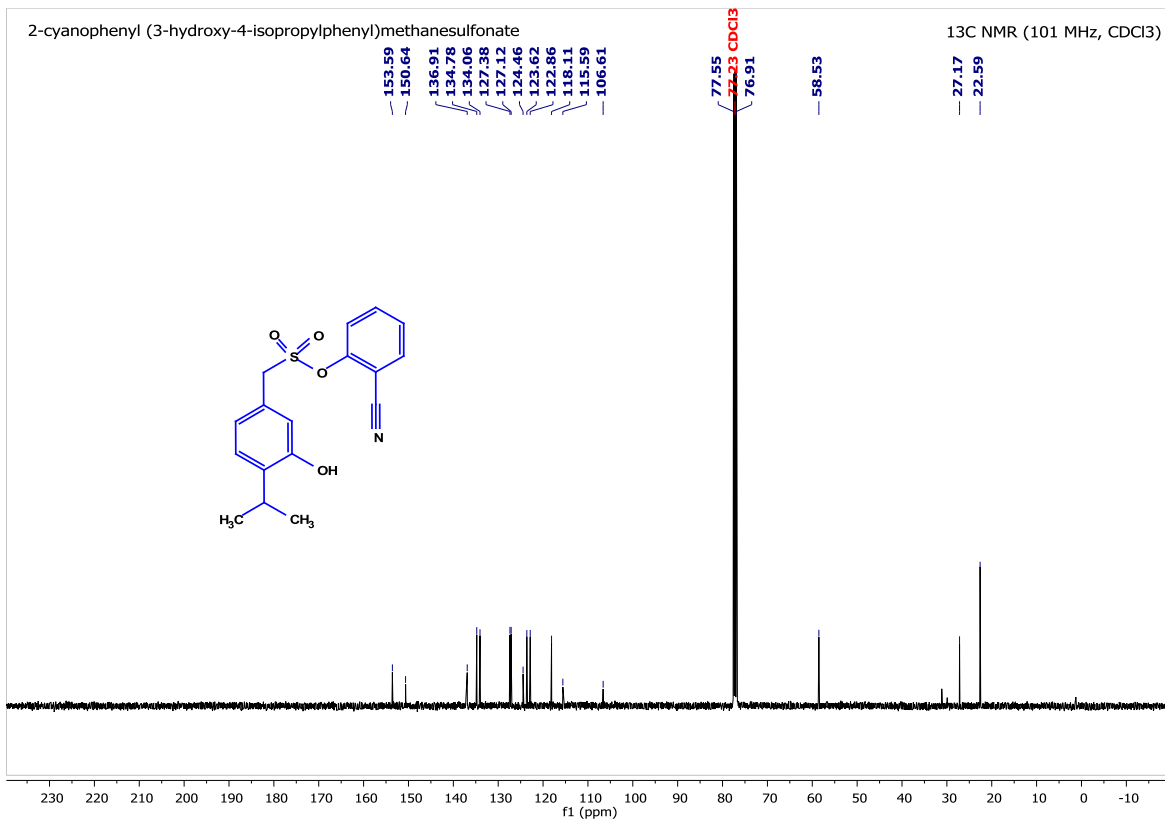



## 2-cyanophenyl (3-hydroxy-4-phenoxyphenyl)methanesulfonate (1d):

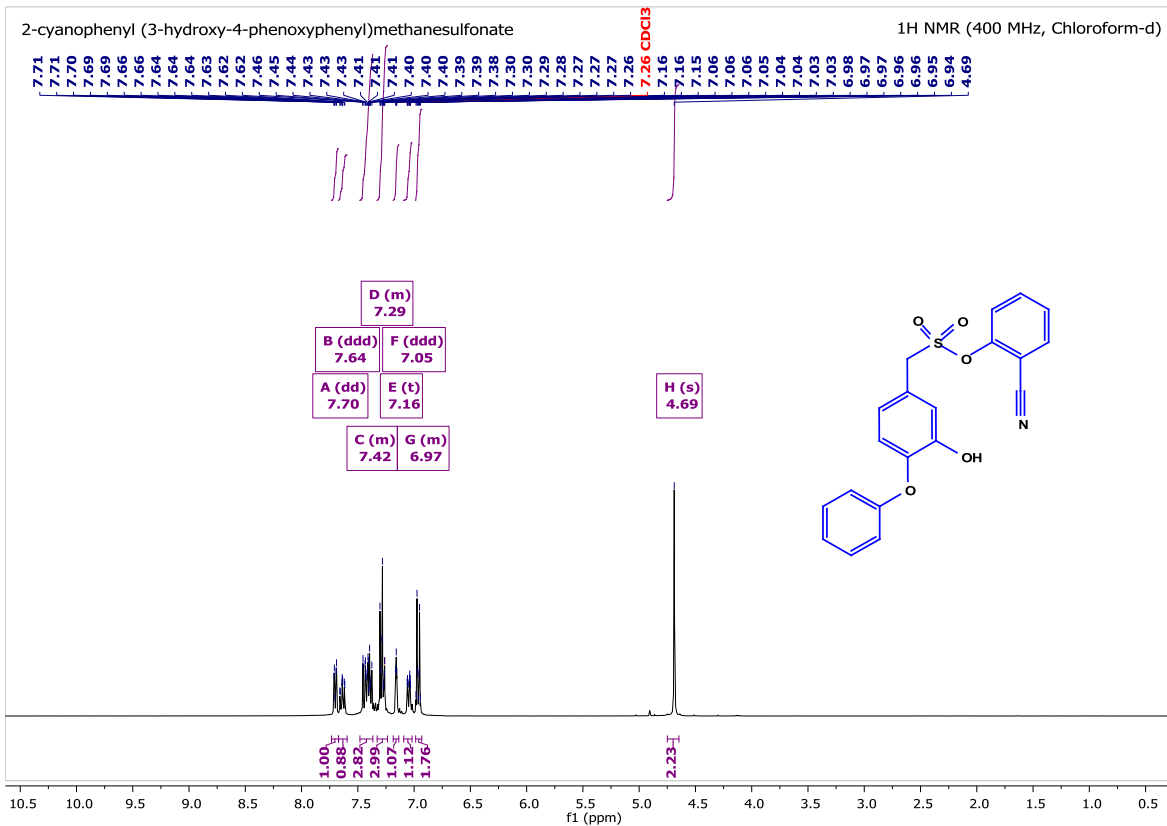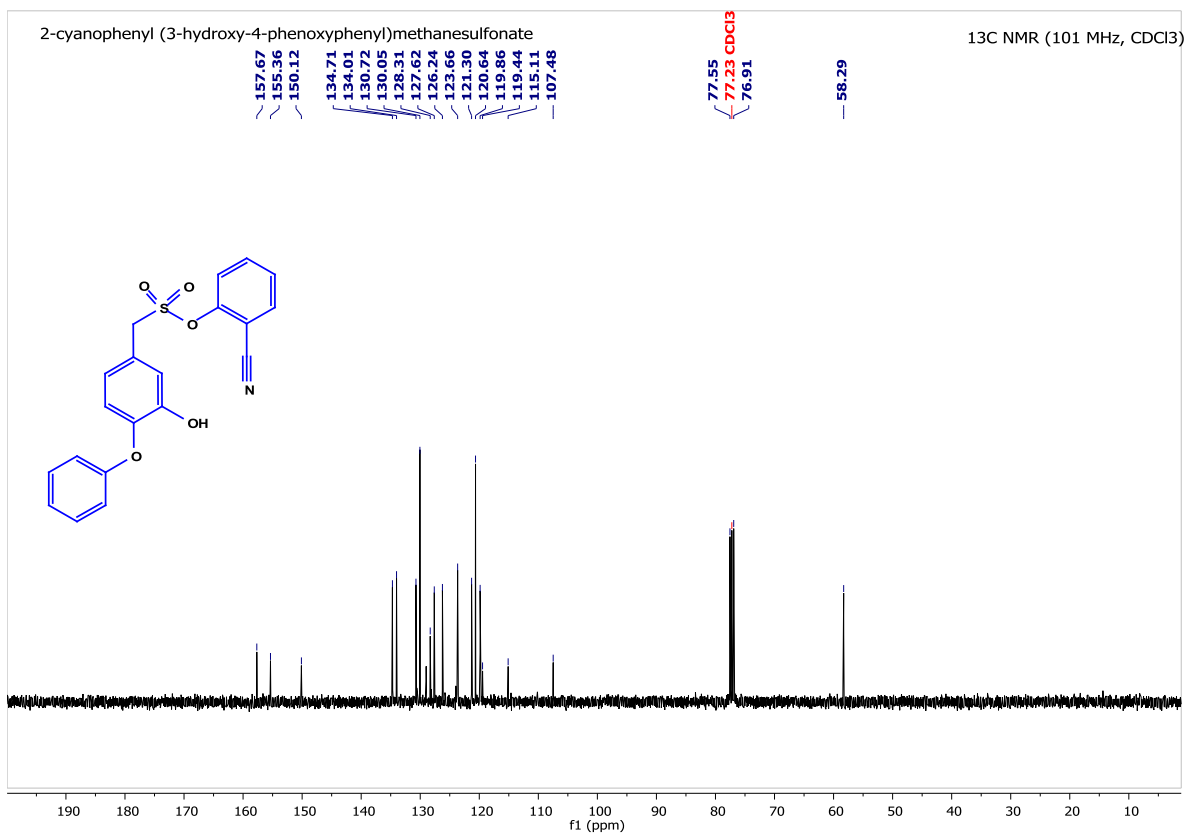

**2-cyanophenyl (4-fluoro-3-hydroxyphenyl)methanesulfonate (1e):**

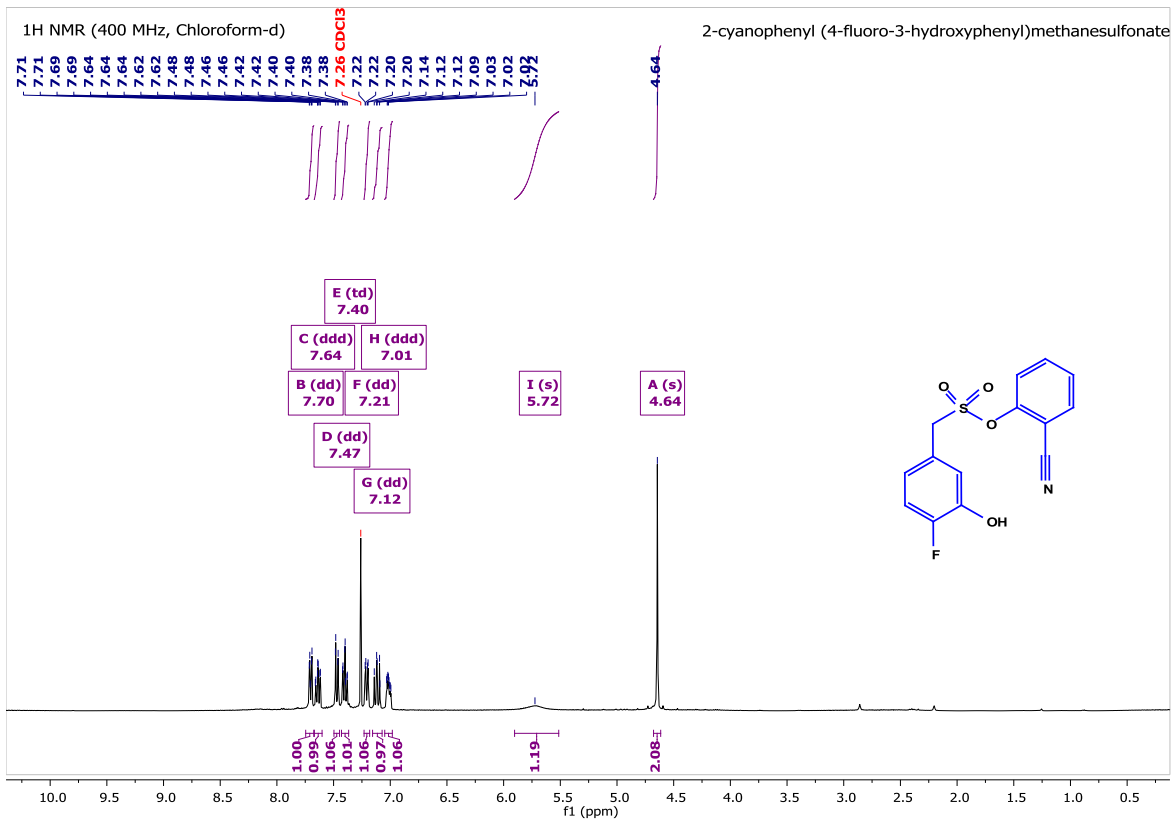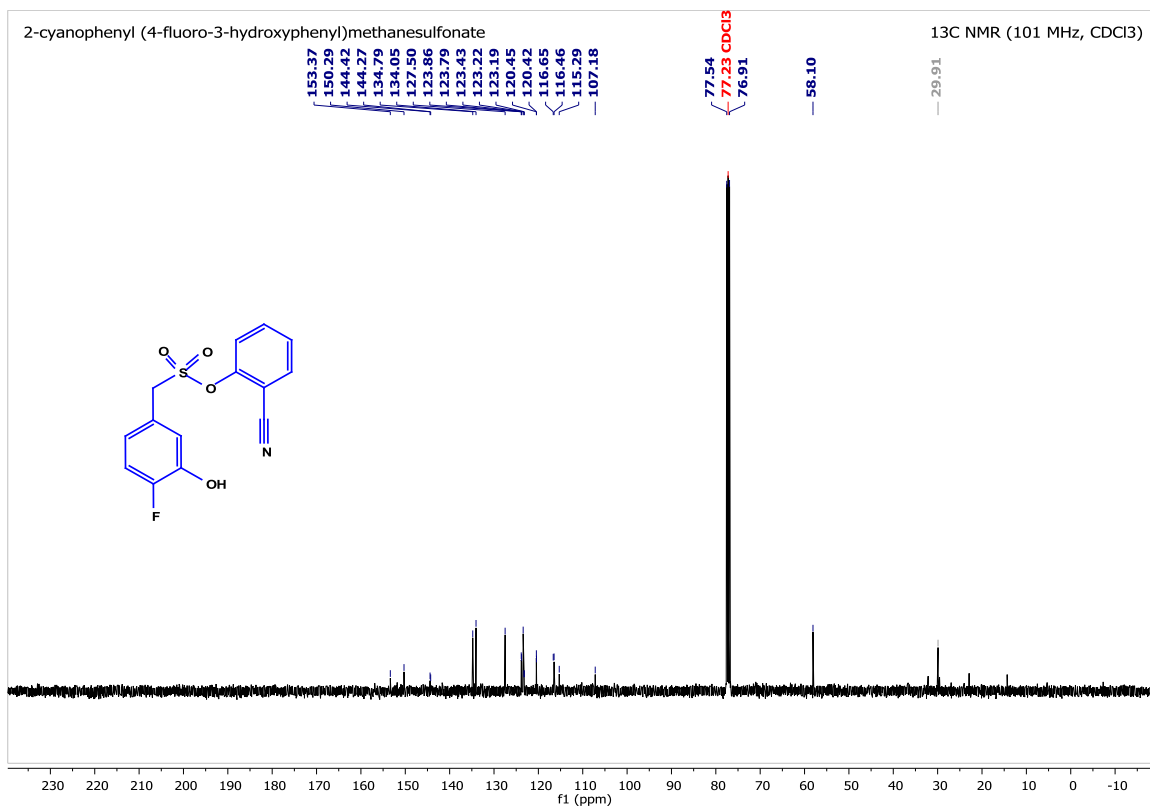

**2-cyanophenyl (3-hydroxy-4-(trifluoromethoxy)phenyl)methanesulfonate (1f):**

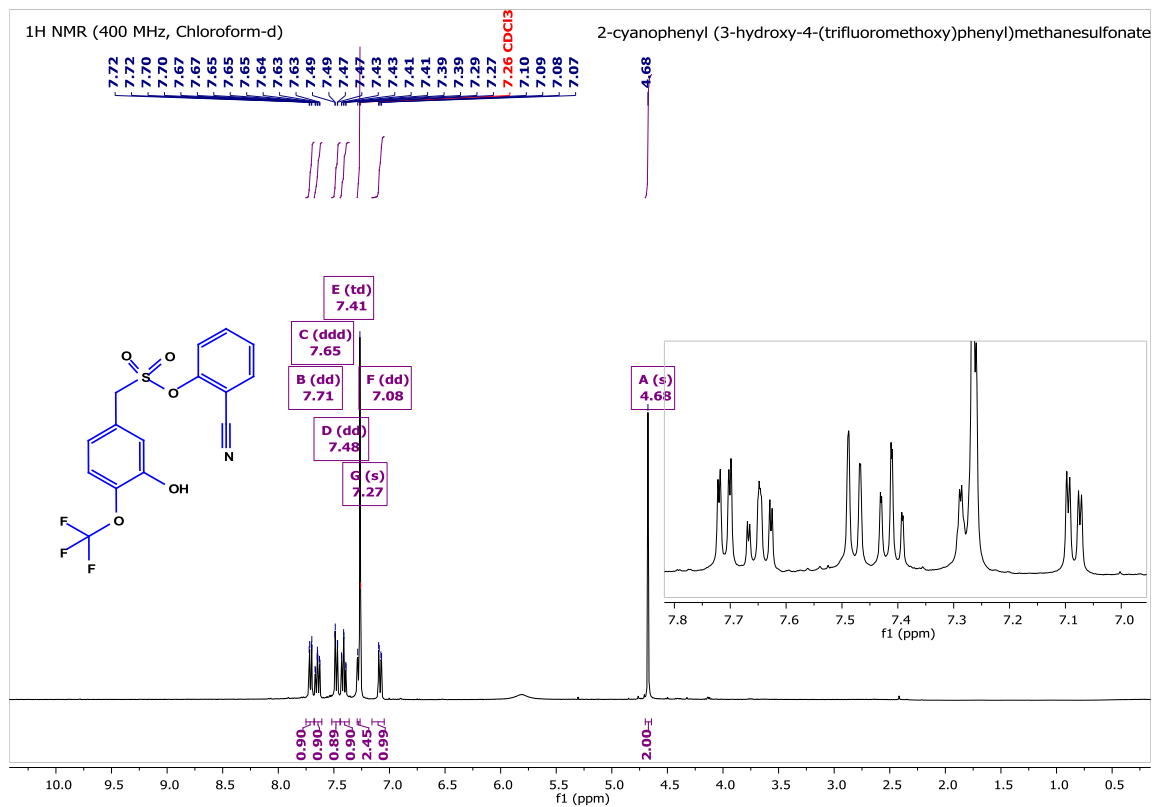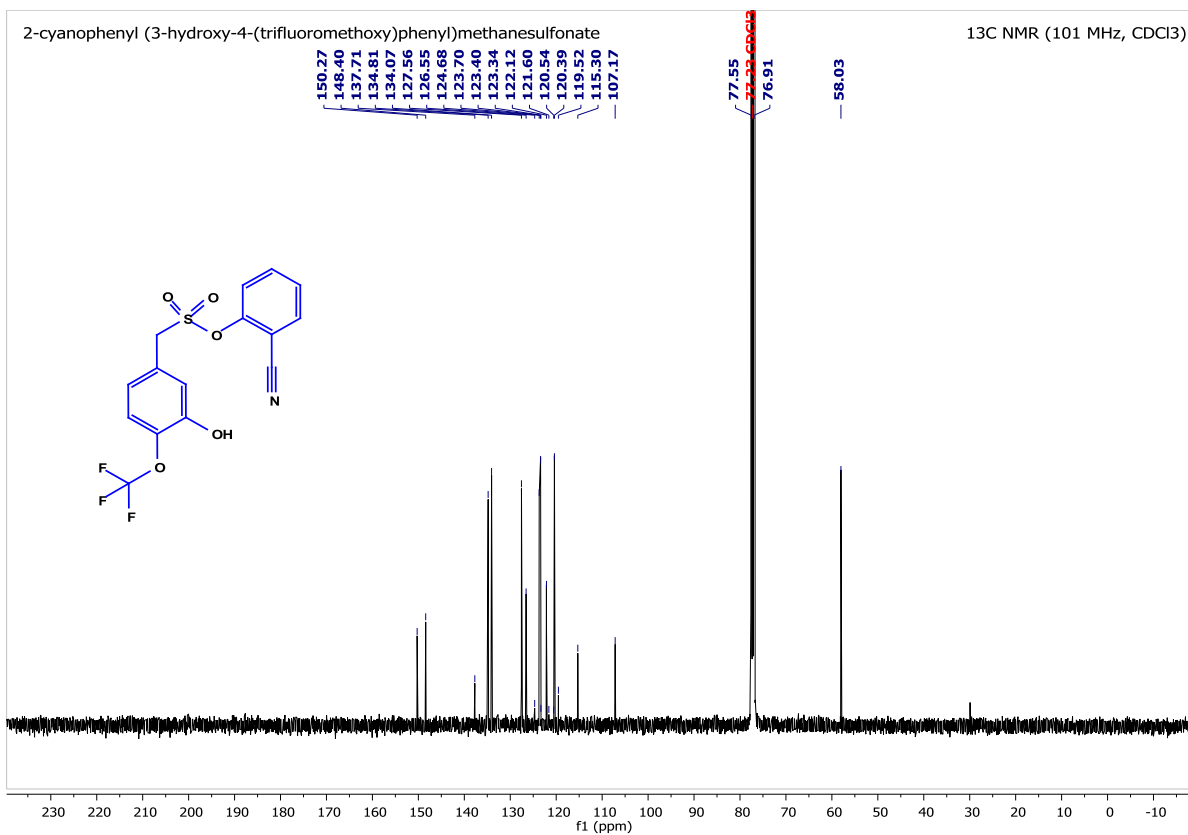

**2-cyanophenyl (3-hydroxy-5-methylphenyl)methanesulfonate (1g):**

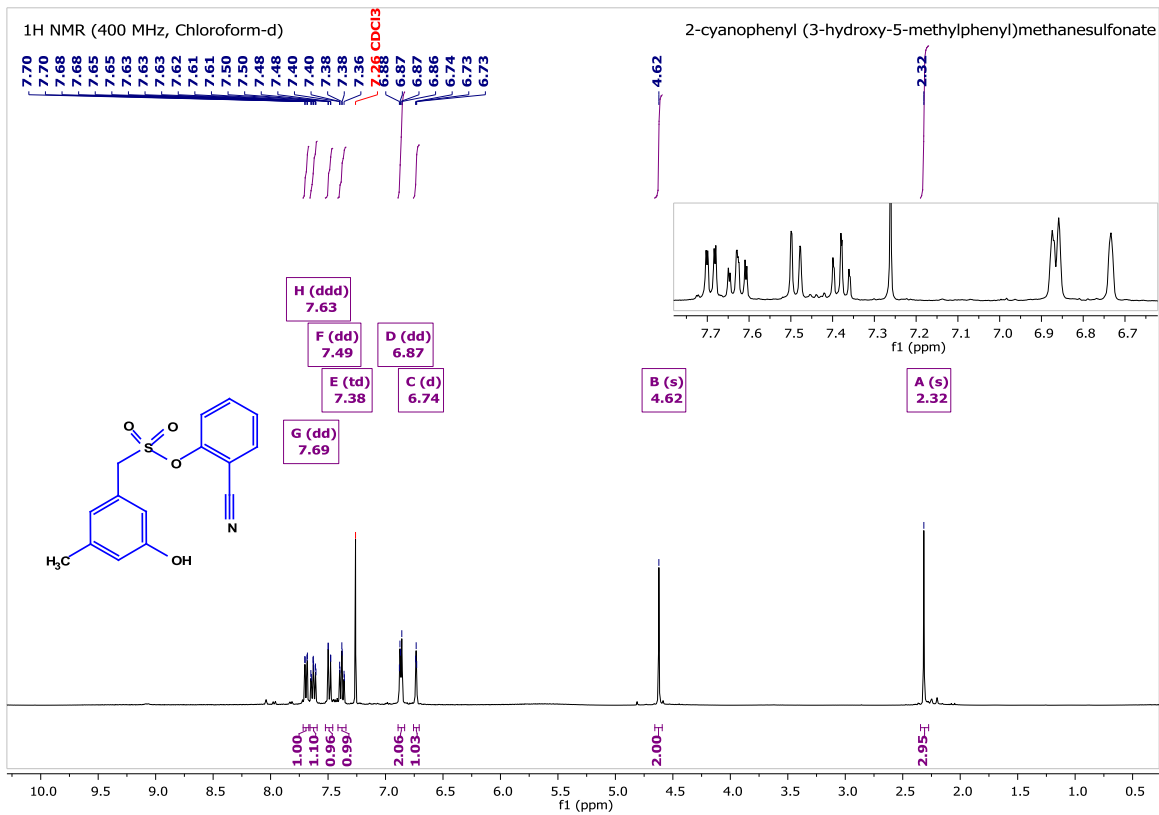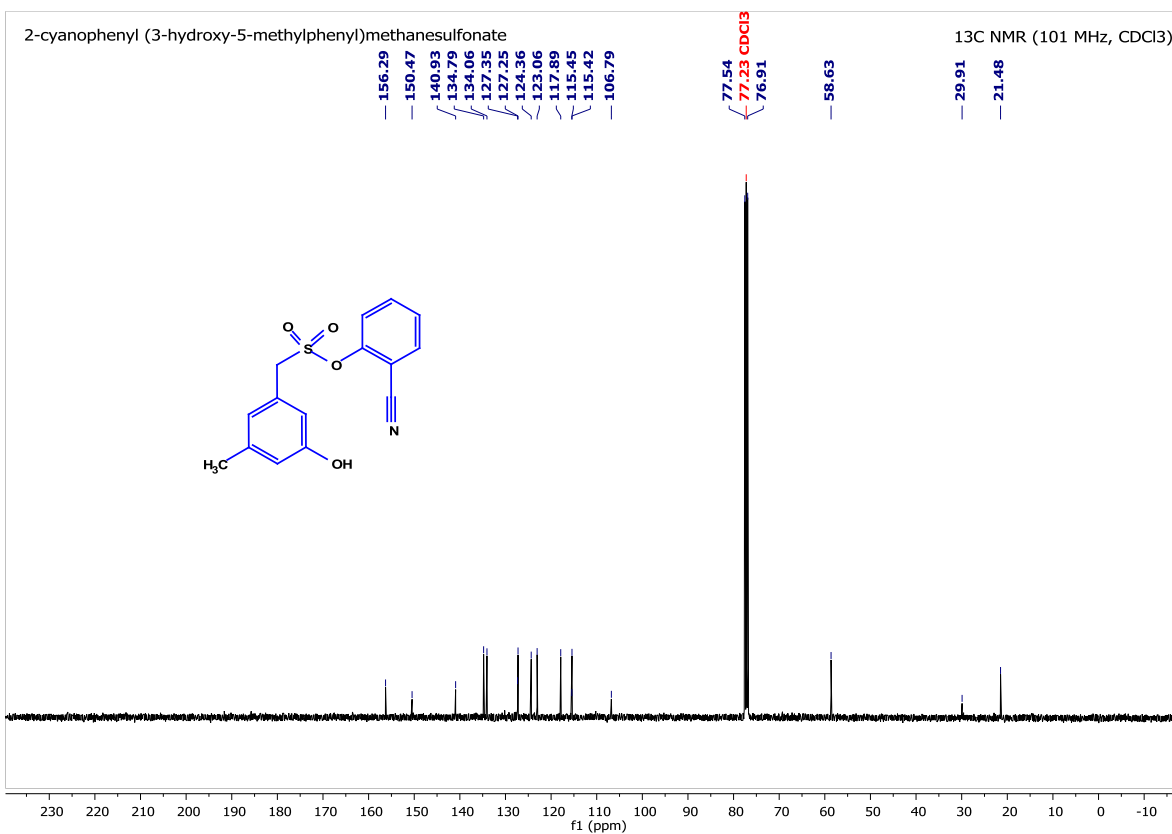

**2-cyanophenyl (2,4-dichloro-5-hydroxyphenyl)methanesulfonate (1h):**

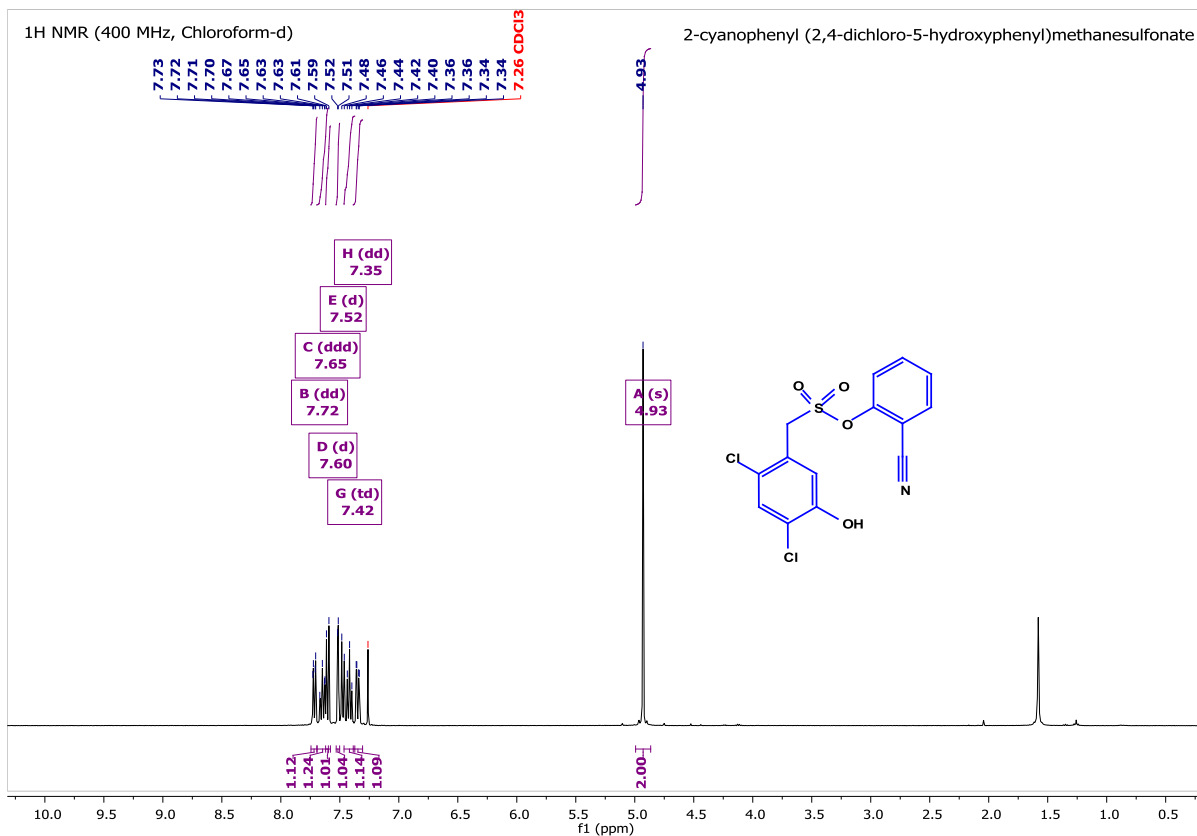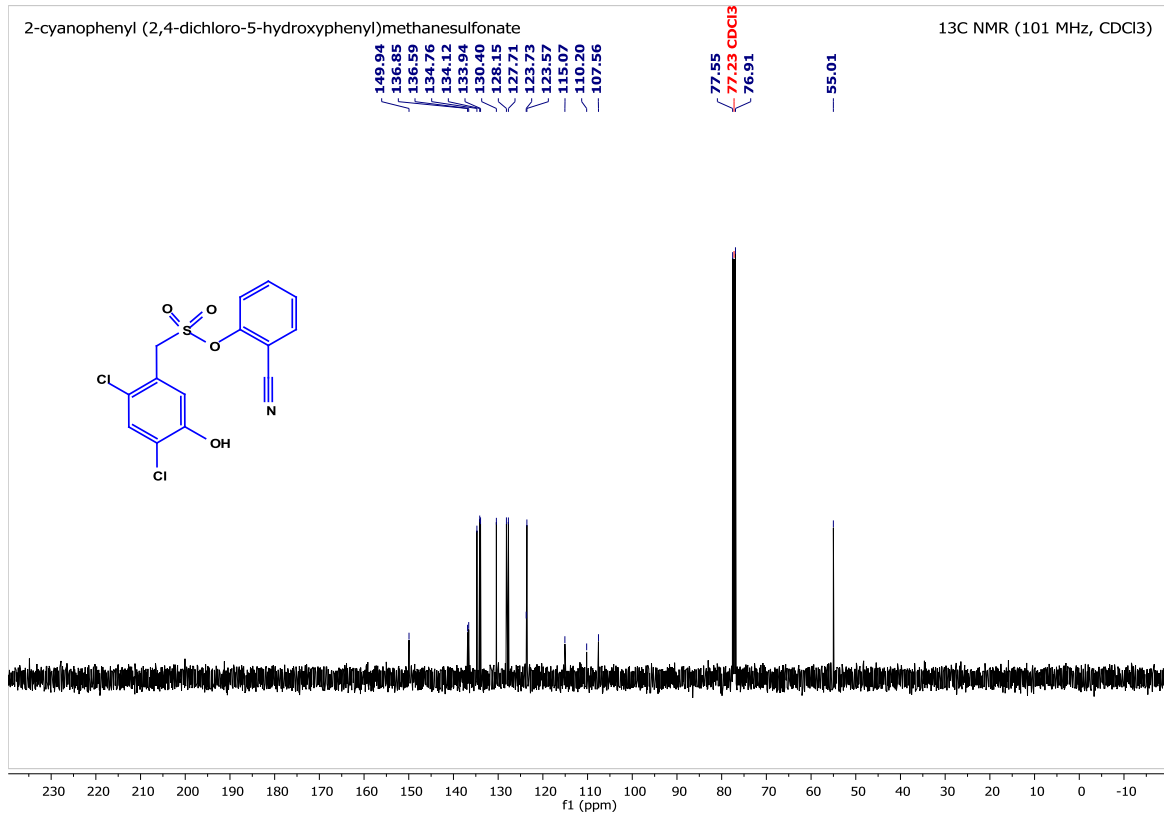

**2-cyanophenyl (2,4-dibromo-5-hydroxyphenyl)methanesulfonate (1i):**

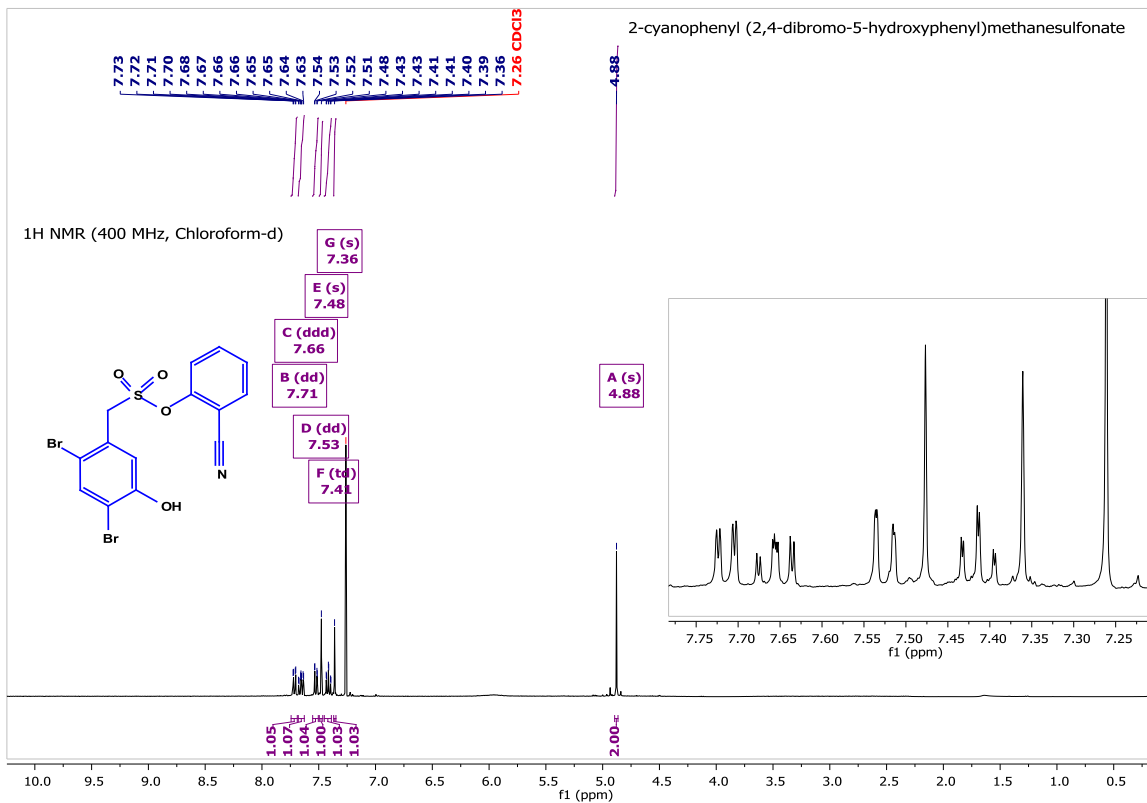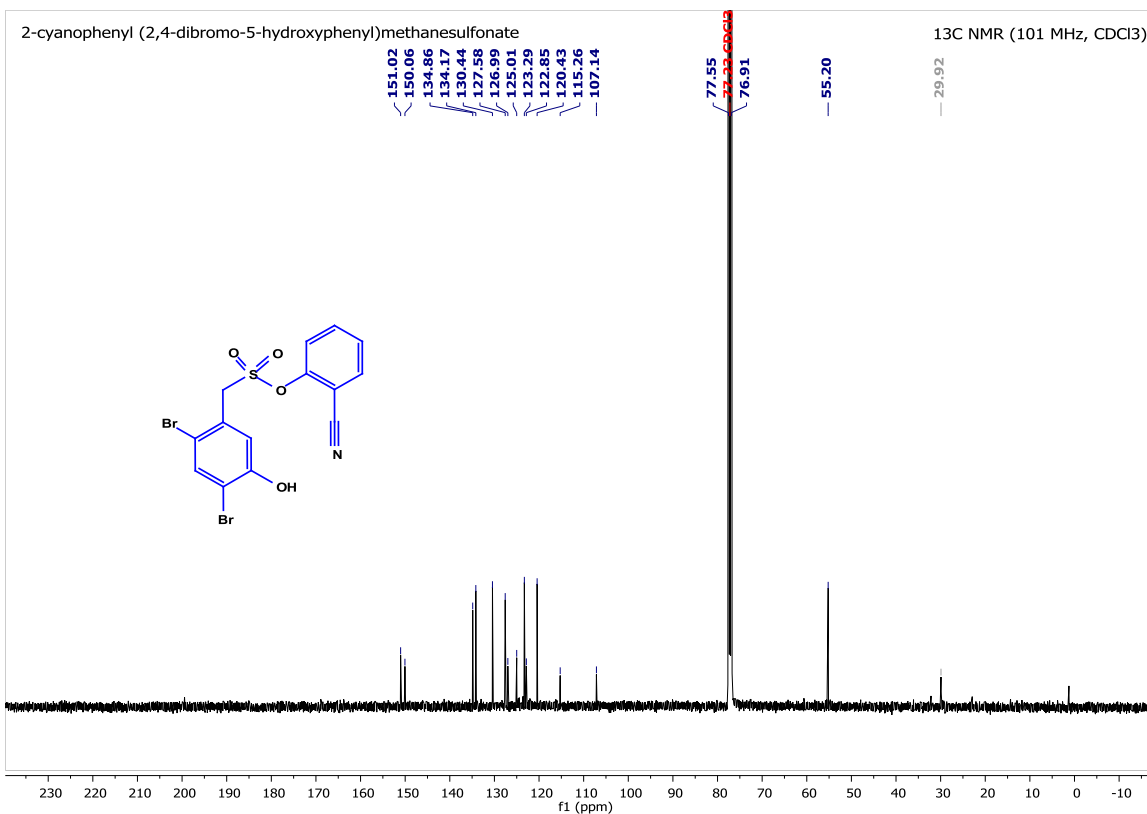

**2-cyanophenyl (2-bromo-3-hydroxy-5-methoxyphenyl)methanesulfonate (1j) :**

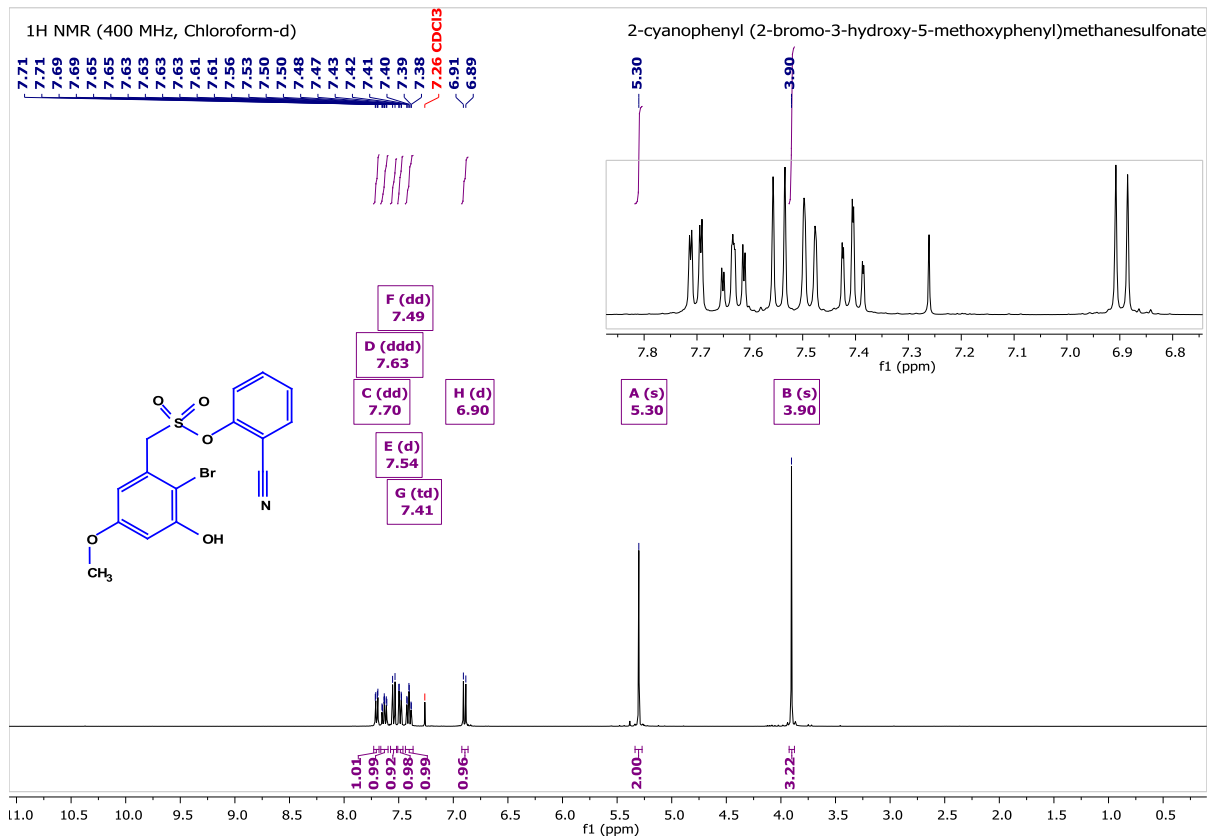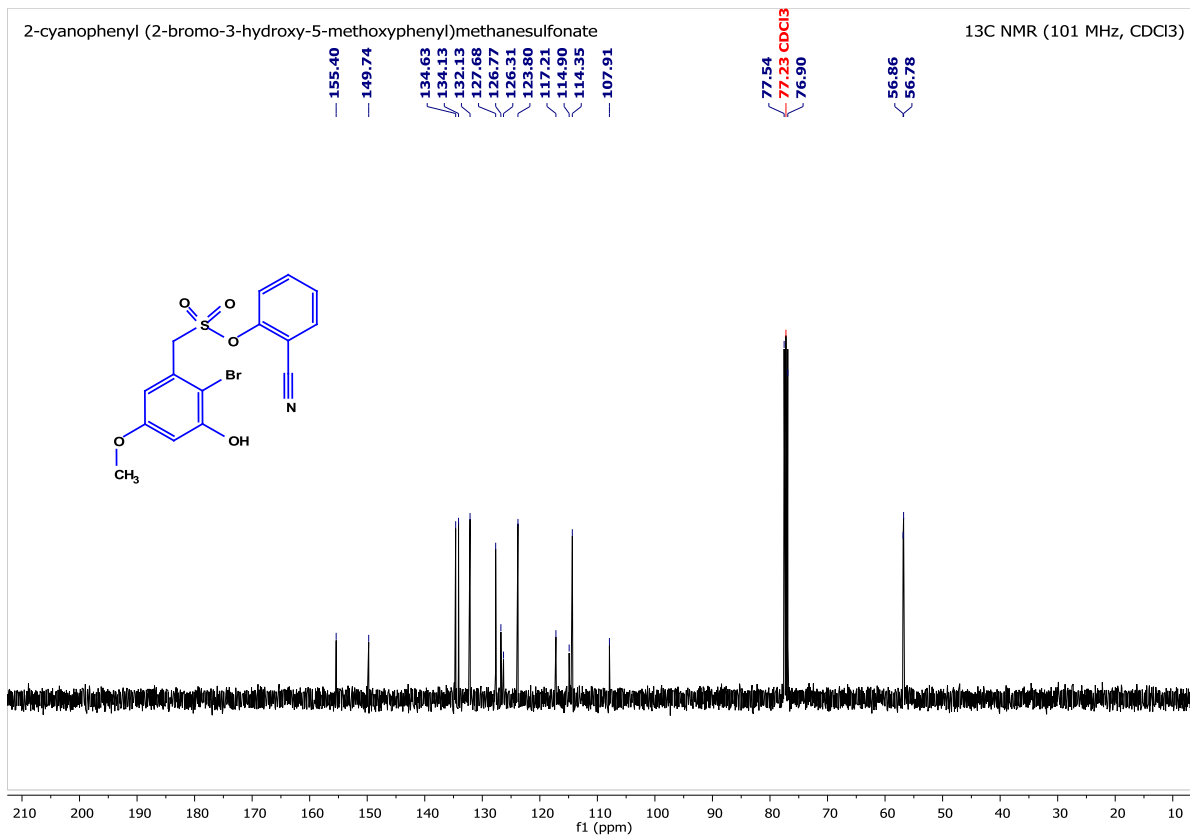

## 2-cyanophenyl (2,6-difluoro-3-hydroxyphenyl)methanesulfonate (1k):

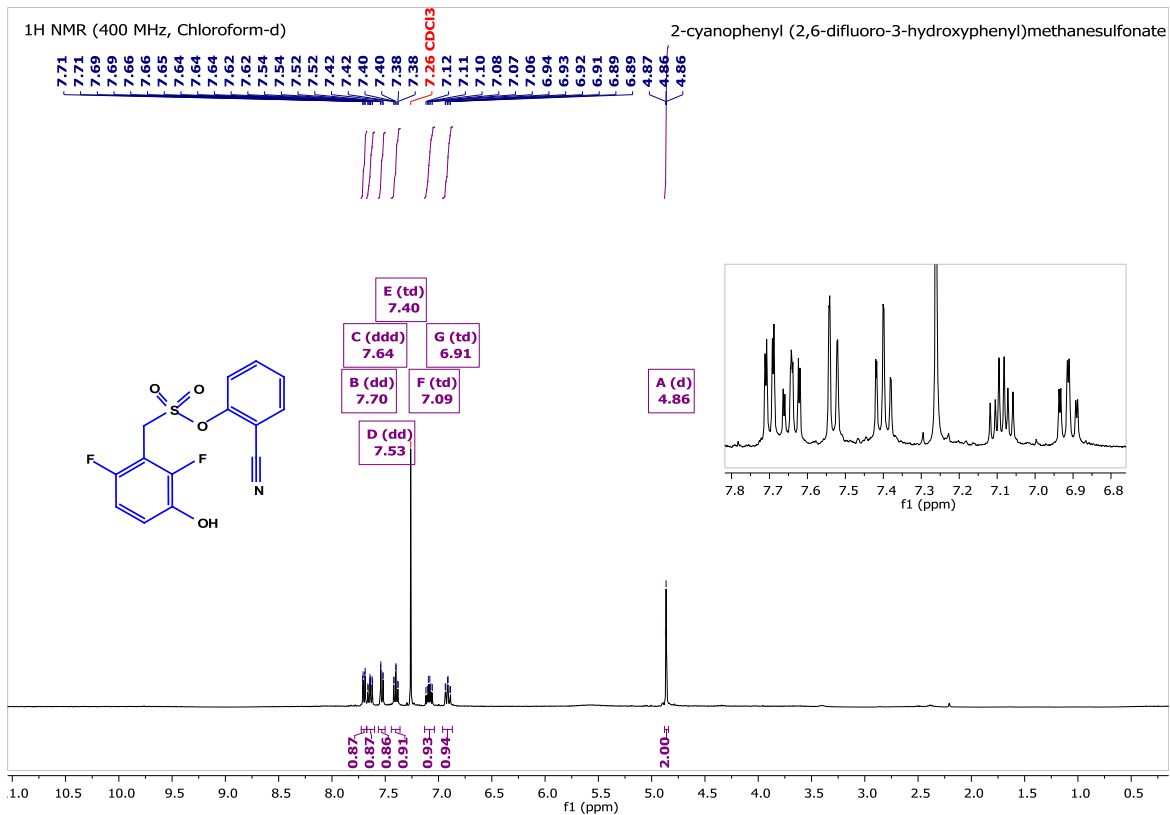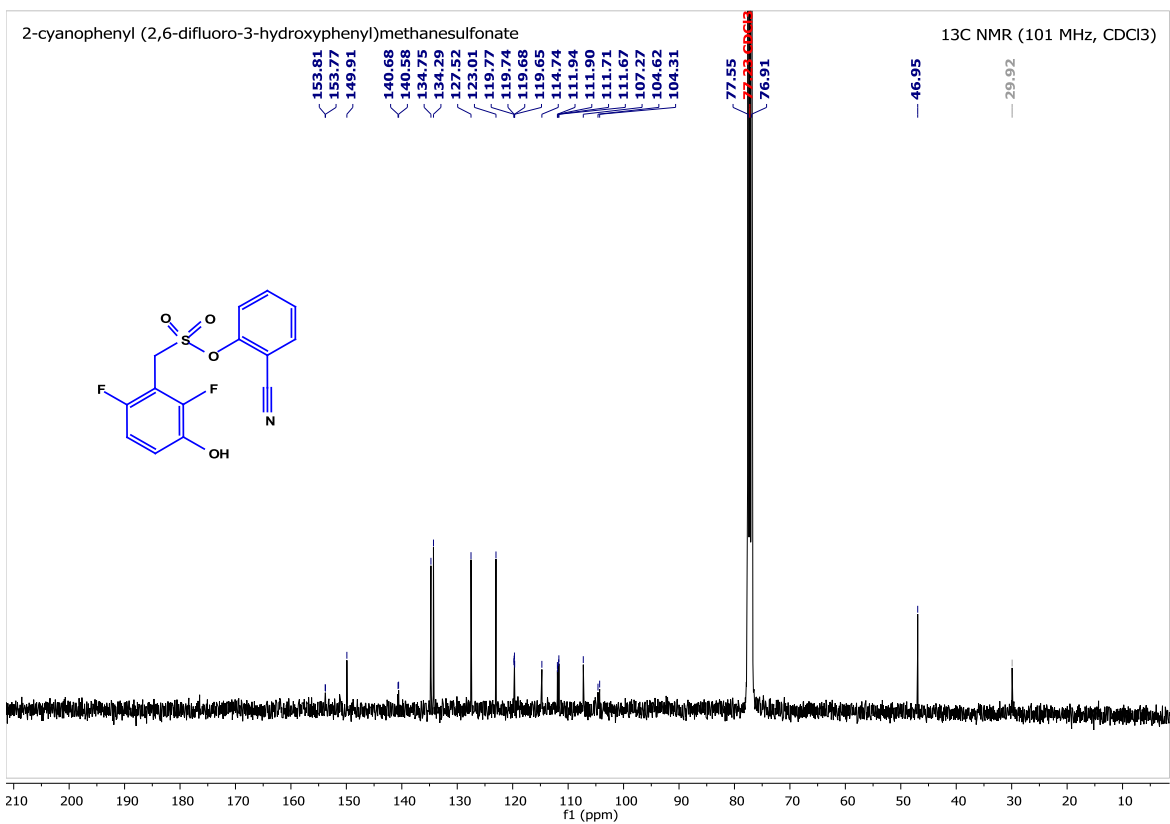



**2-cyanophenyl (4-bromo-3-hydroxyphenyl)methanesulfonate (11):**

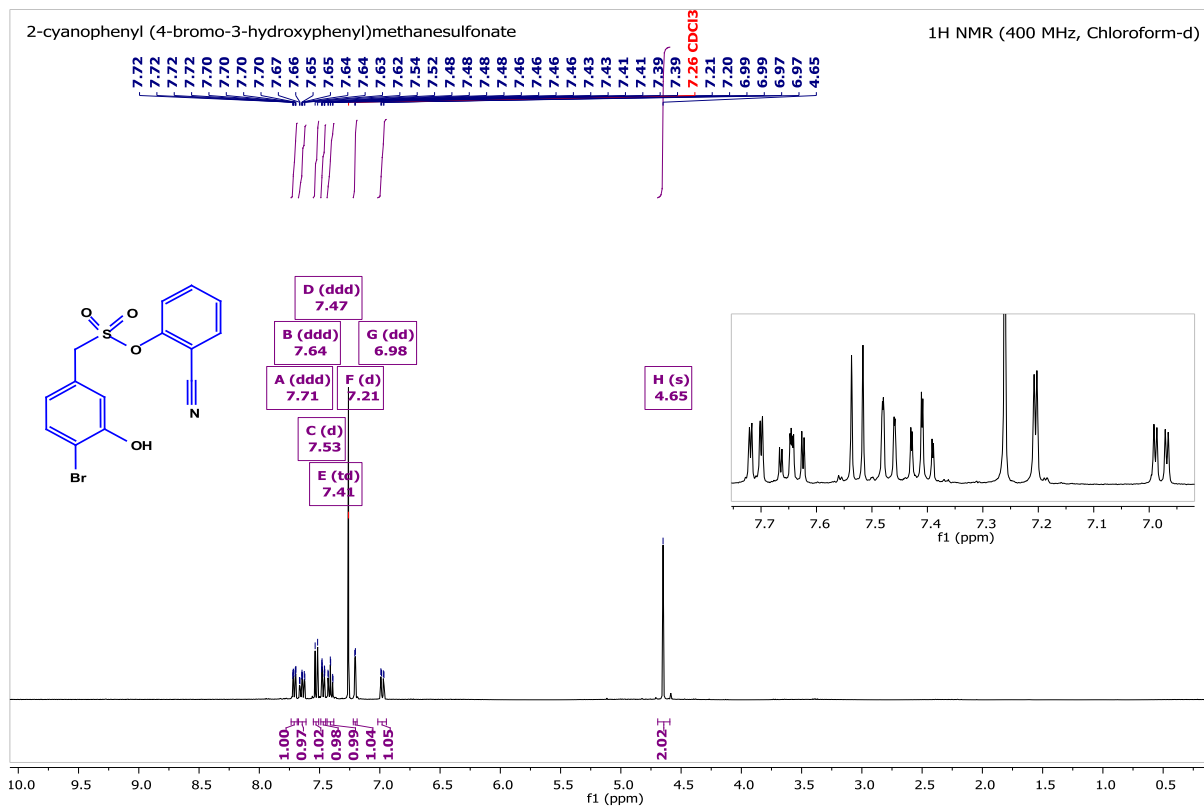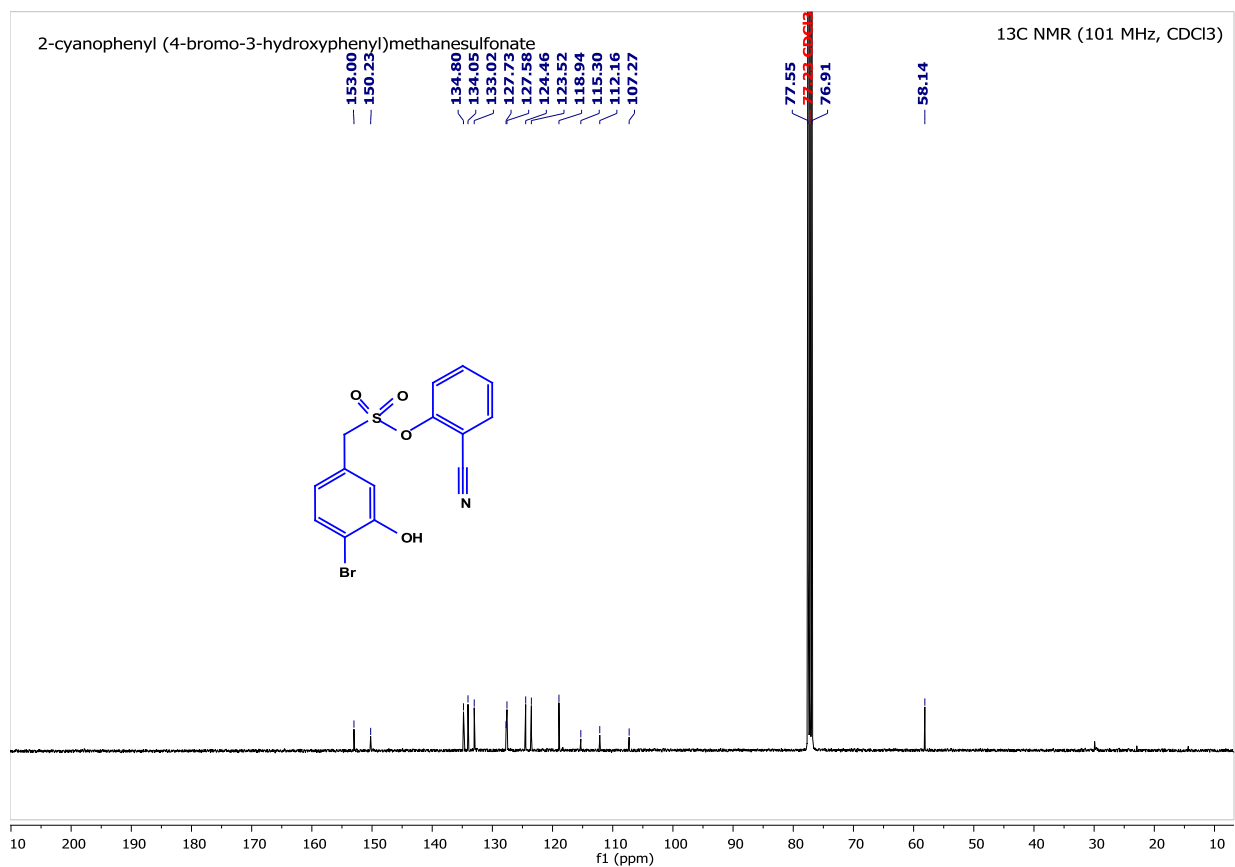

## 2-cyanophenyl (2-bromo-5-hydroxyphenyl)methanesulfonate (1m):

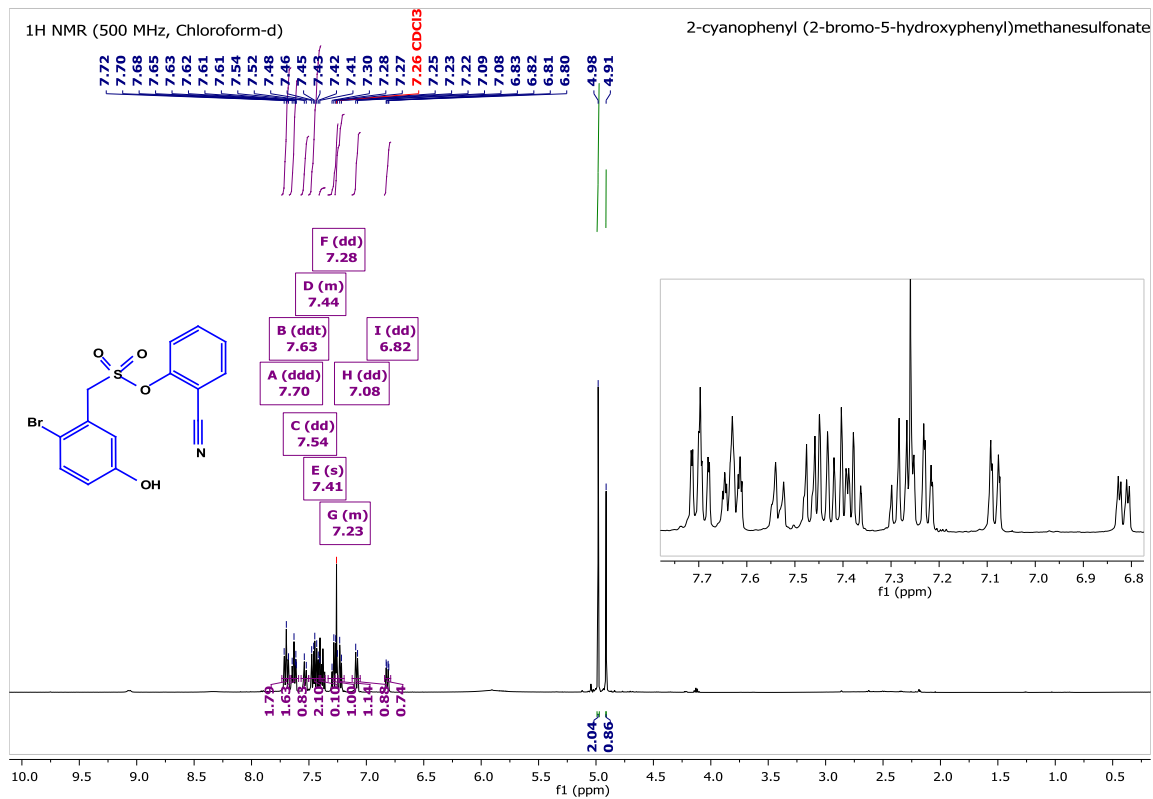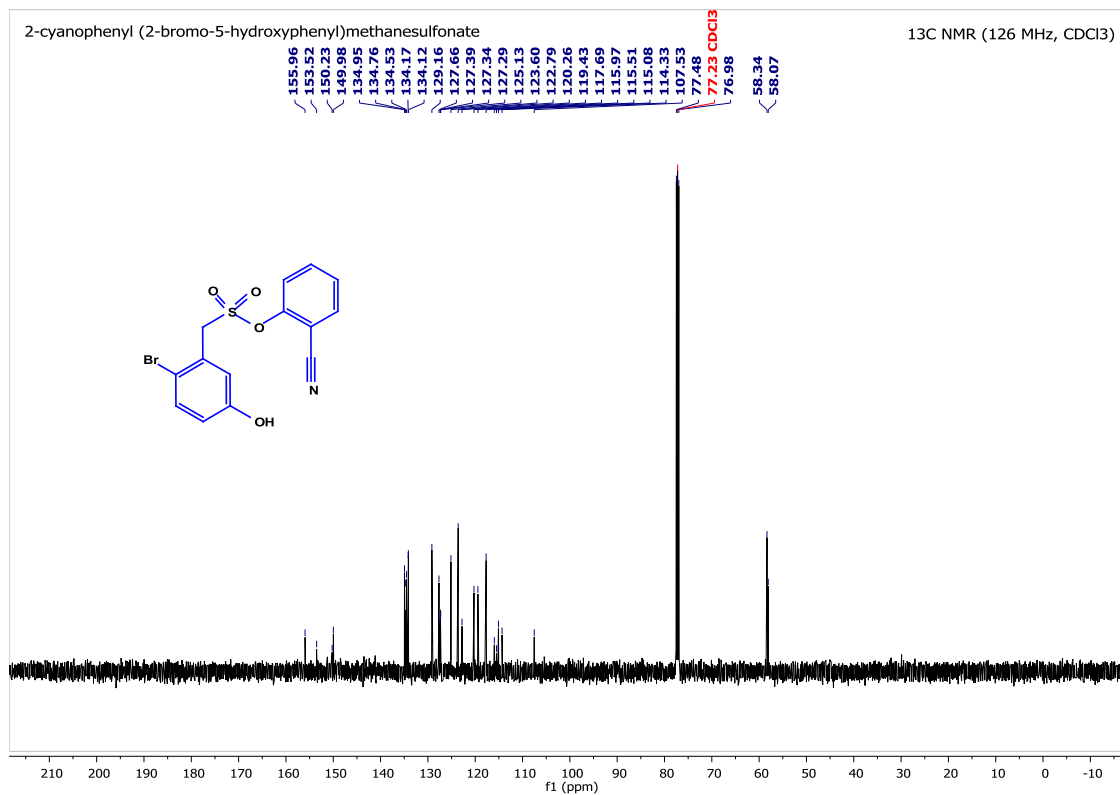

## 2-cyanophenyl (2-chloro-5-hydroxyphenyl)methanesulfonate (1n):

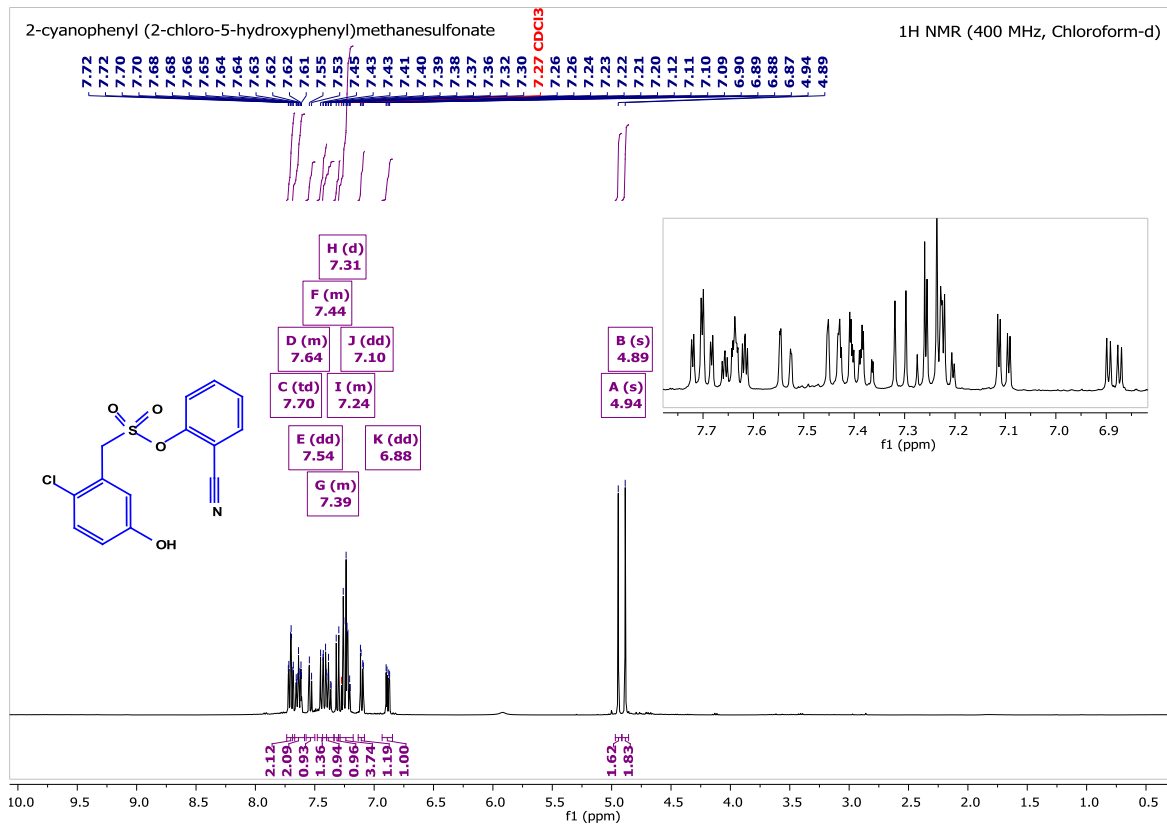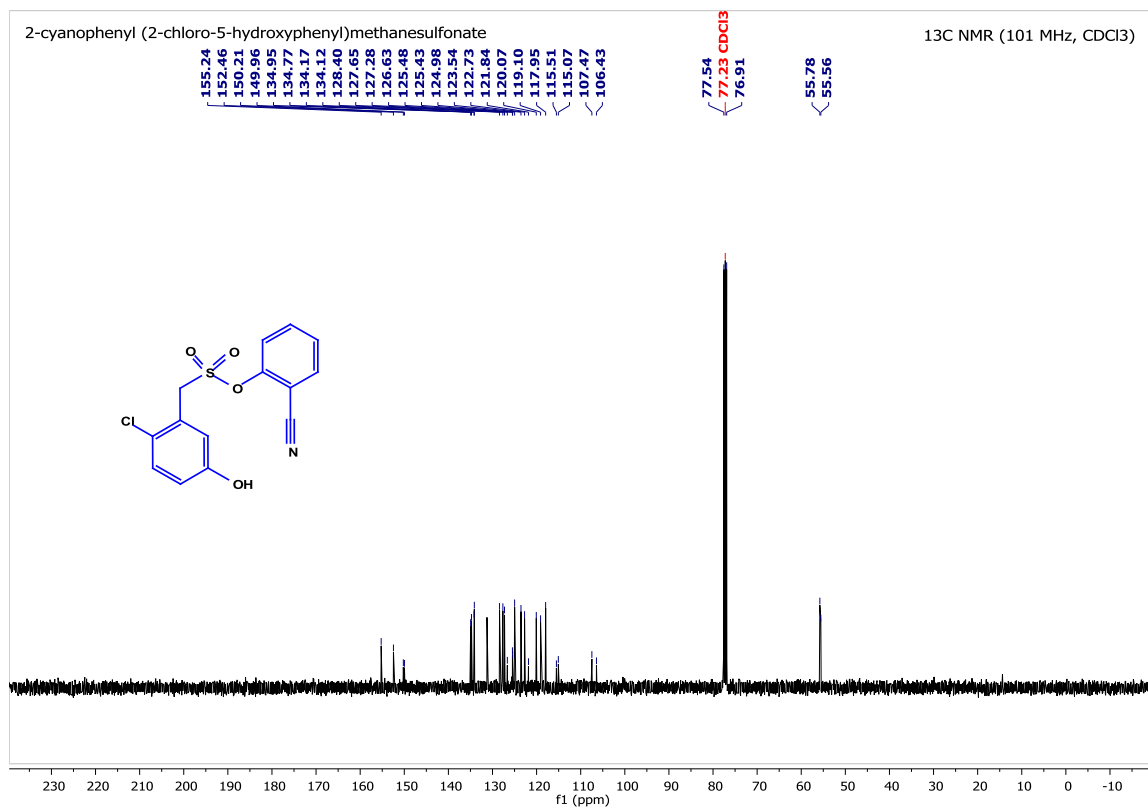

**2-cyanophenyl (5-hydroxy-2-phenoxyphenyl)methanesulfonate (1o):**

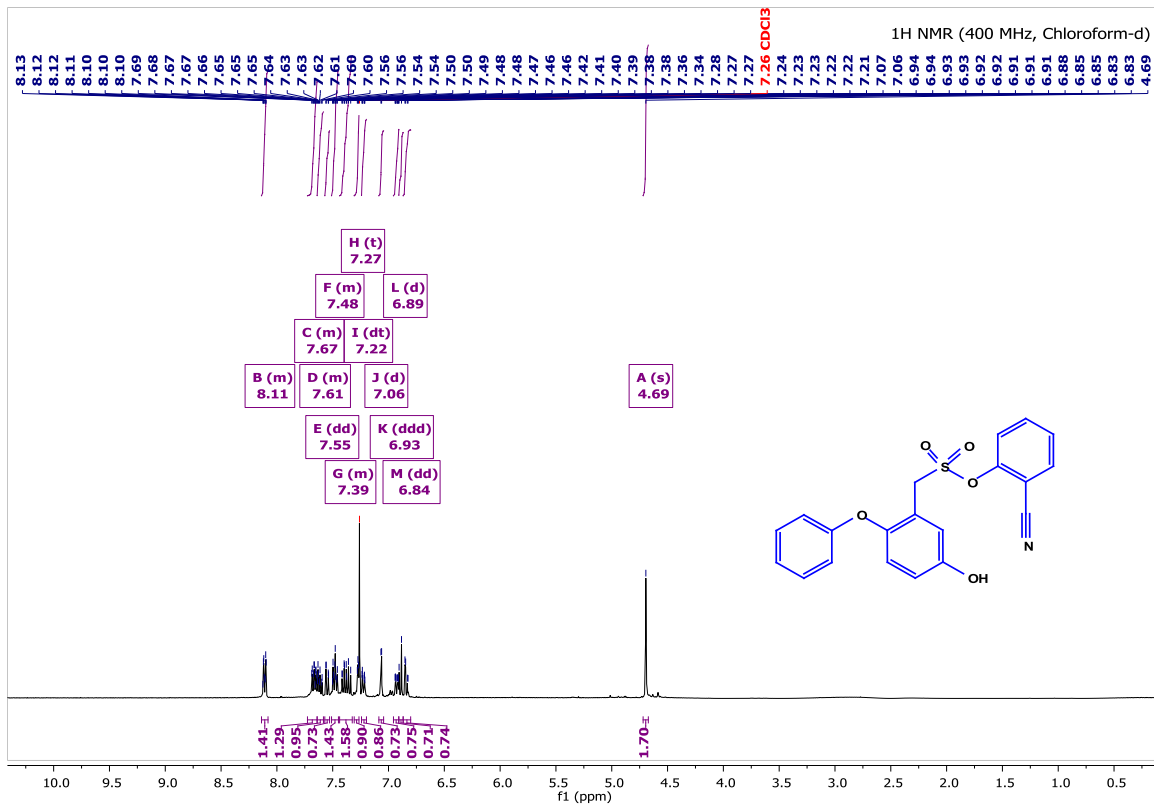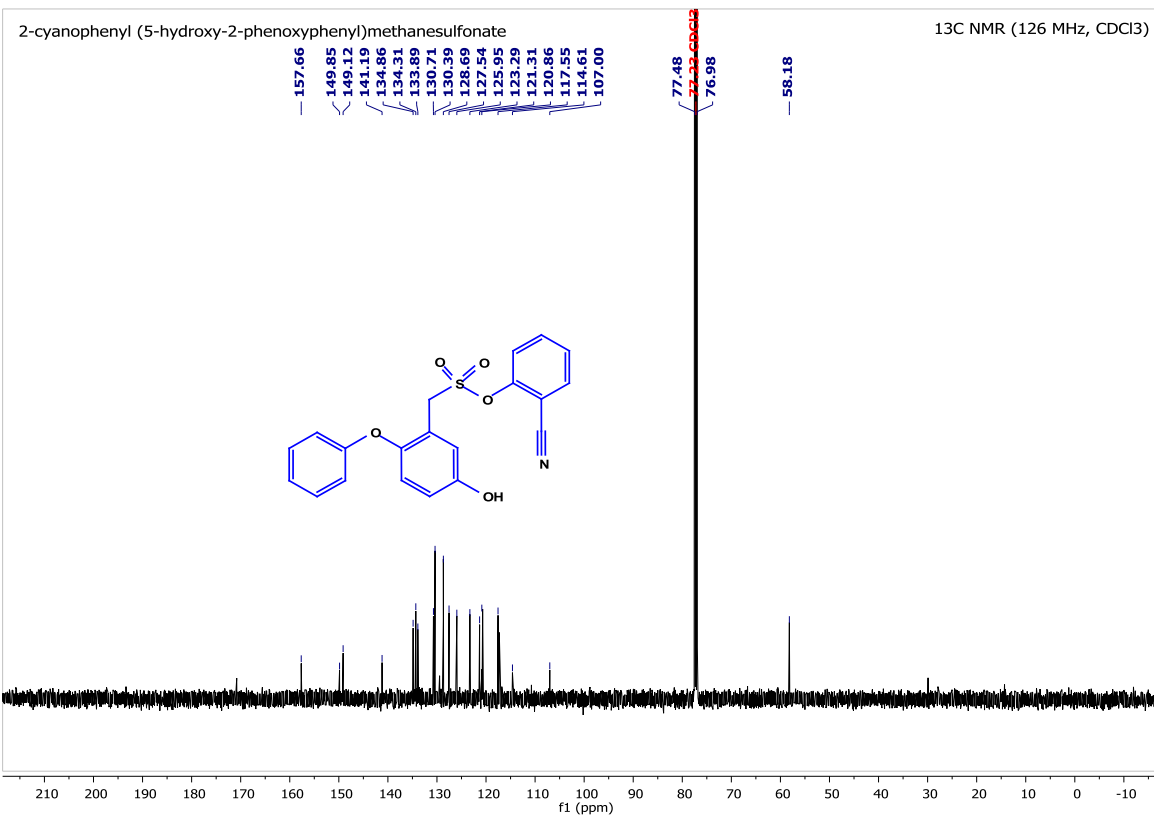

## C. NMR Characterization of the meta-acetoxyated compounds:

### 3-((2-cyanophenoxy)sulfonyl)methyl)phenyl acetate (2a):

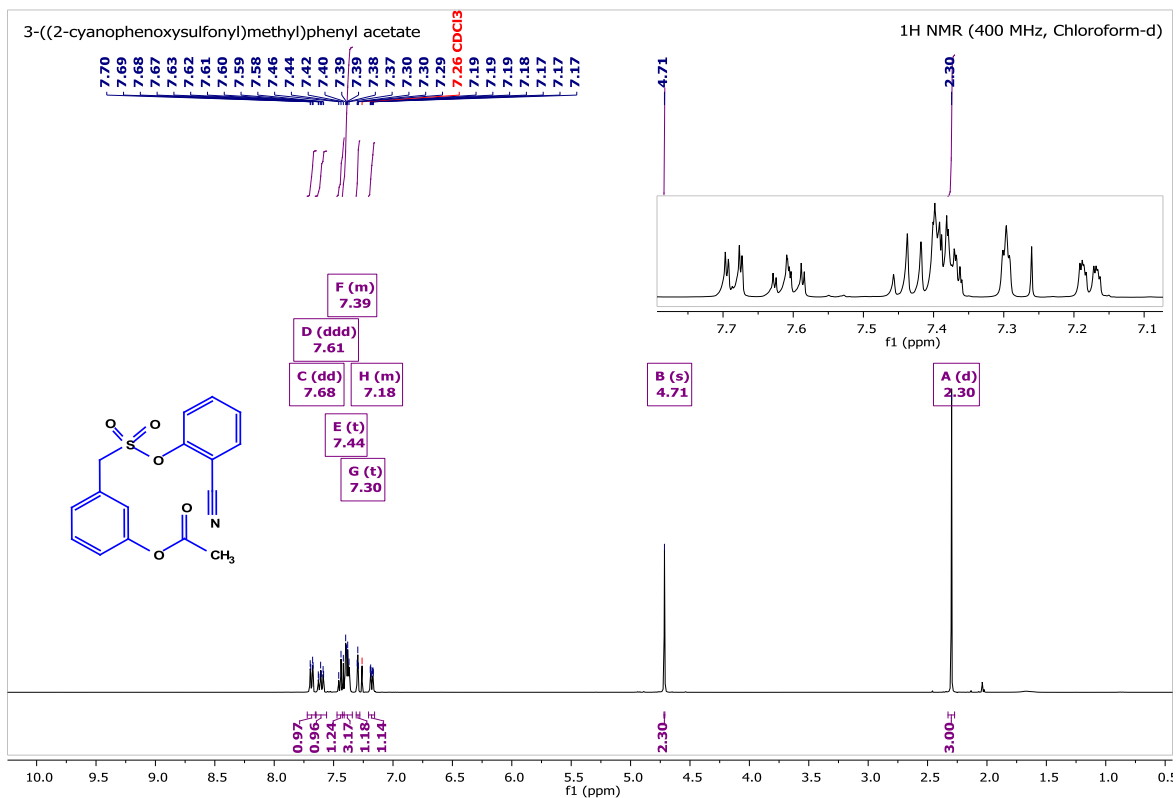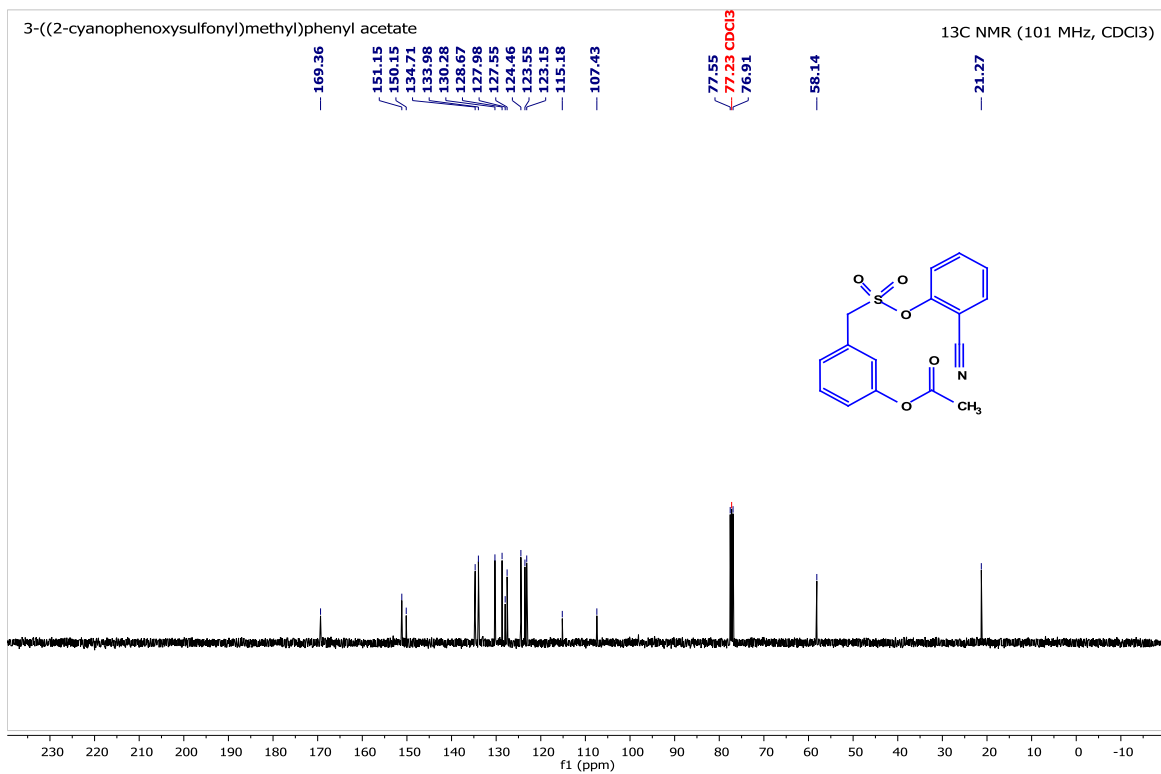

5-((2-cyanophenoxy)sulfonyl)methyl)-2-methylphenyl acetate (2b):

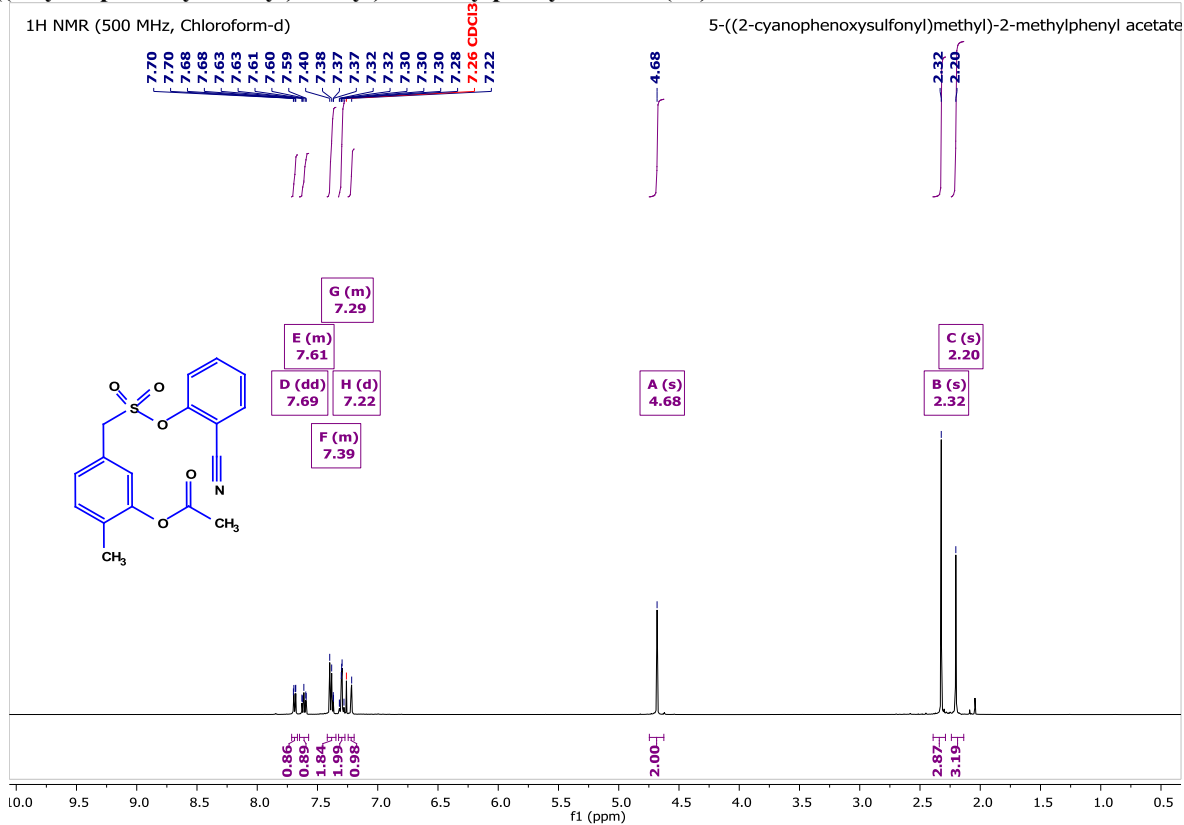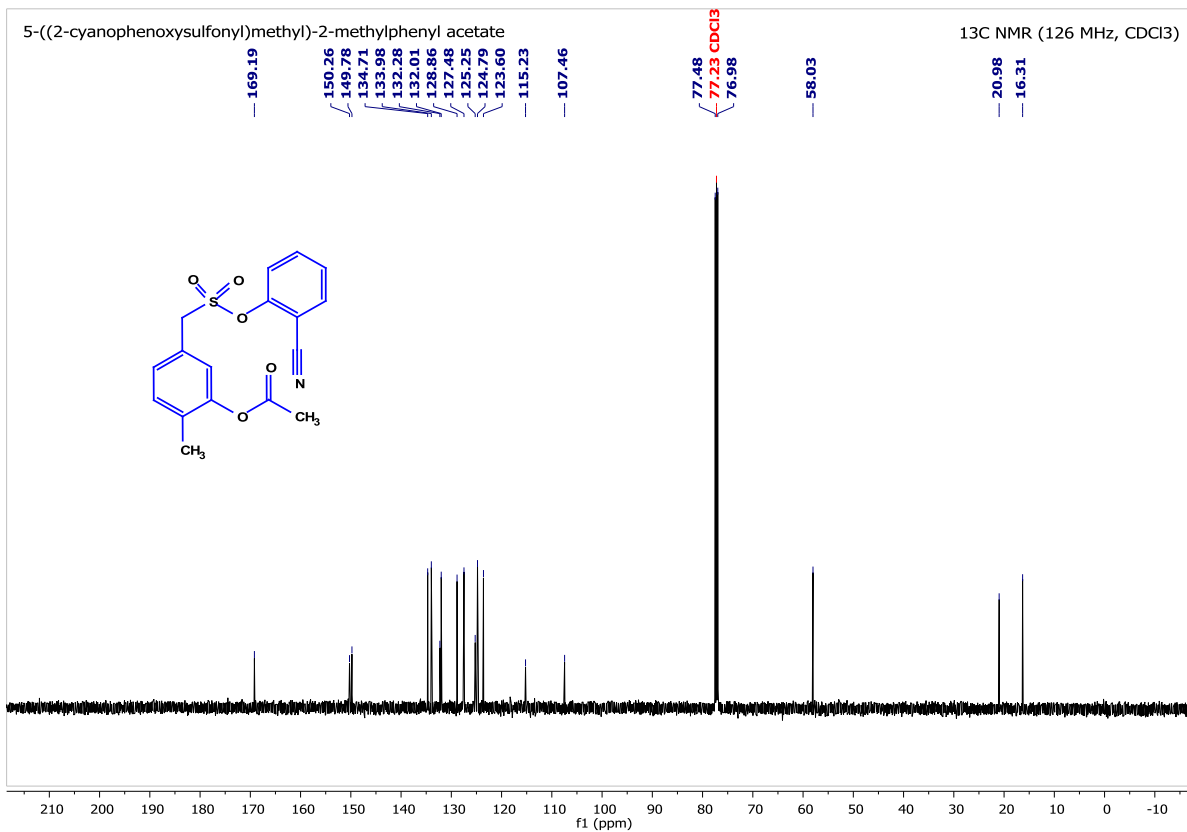

**5-((2-cyanophenoxy)sulfonyl)methyl)-2-isopropylphenyl acetate (2c):**

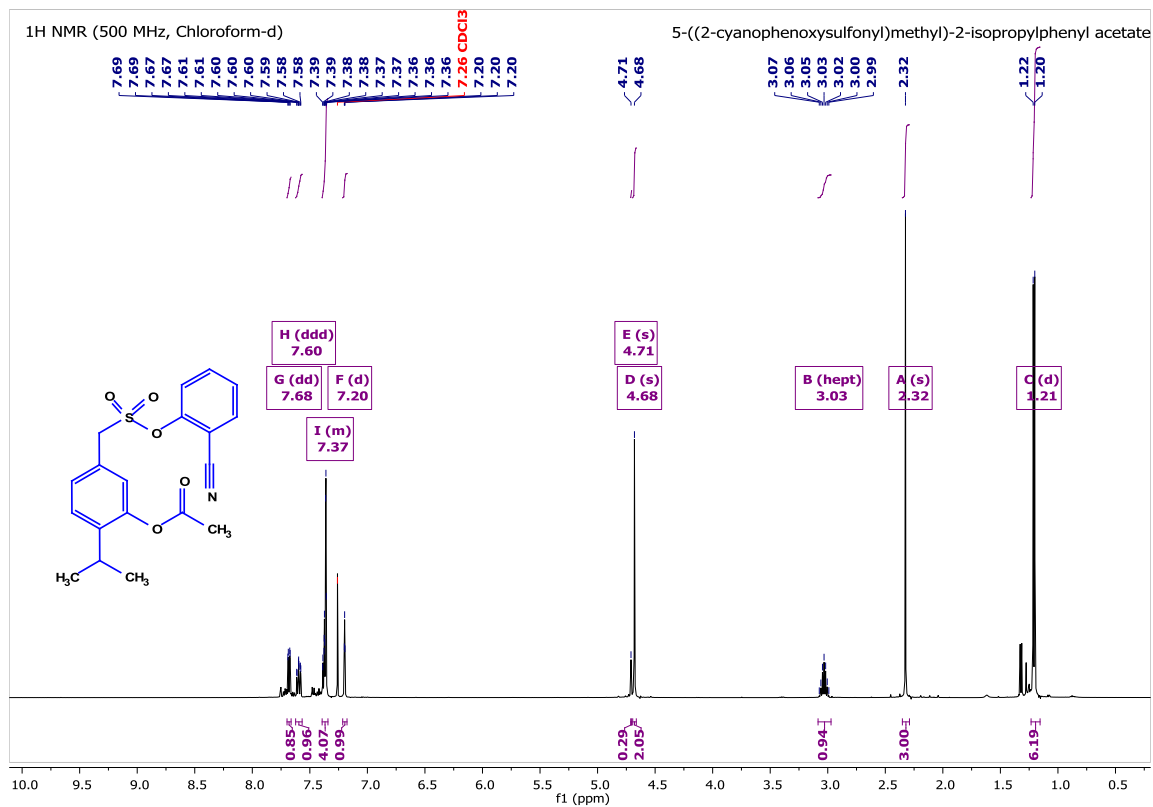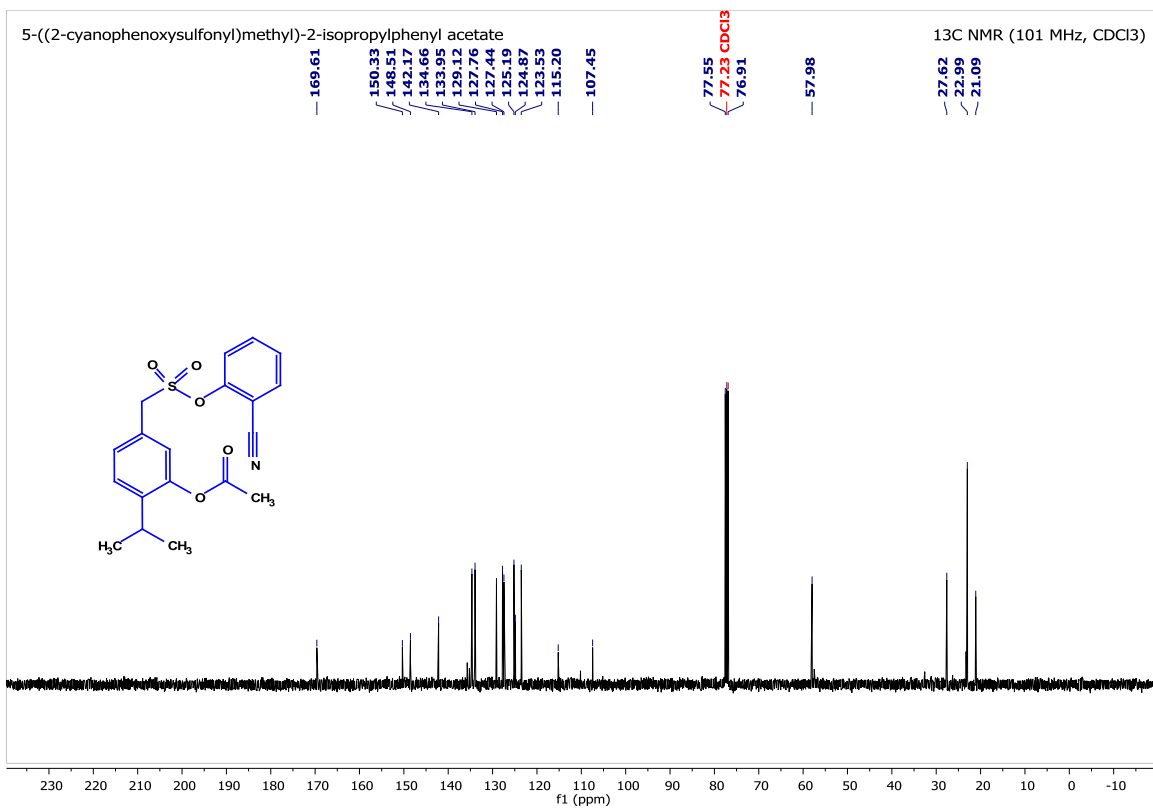

**5-((2-cyanophenoxy)sulfonyl)methyl)-2-(trifluoromethoxy)phenyl acetate (2d):**

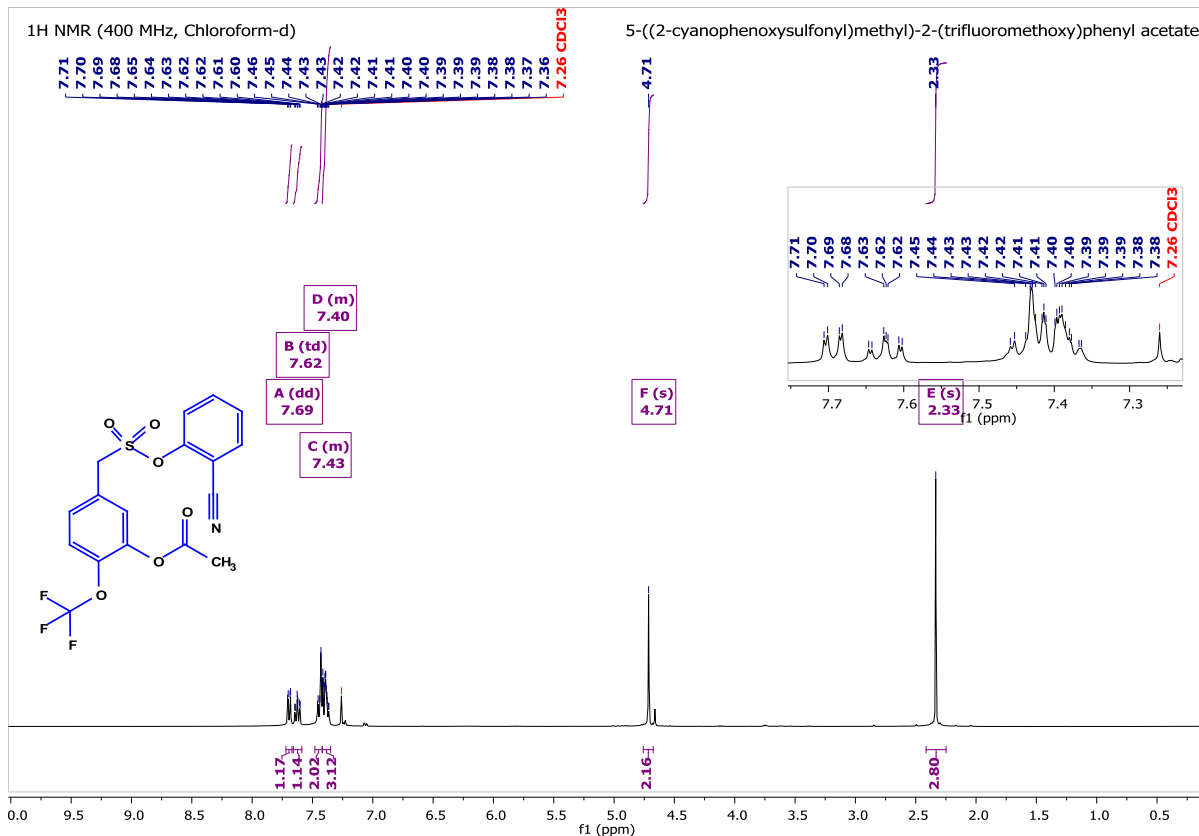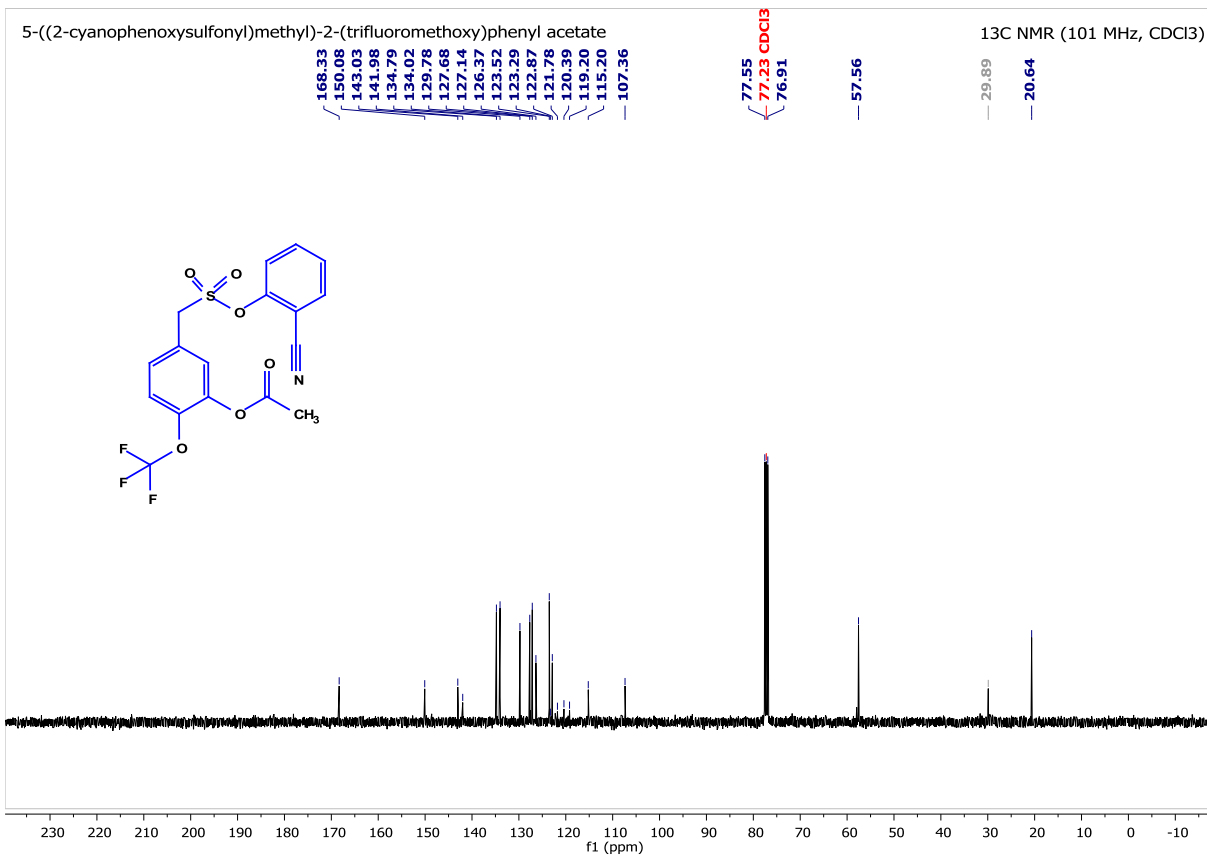



**2-chloro-5-((2-cyanophenoxy)sulfonyl)methyl)phenyl acetate (2e):**

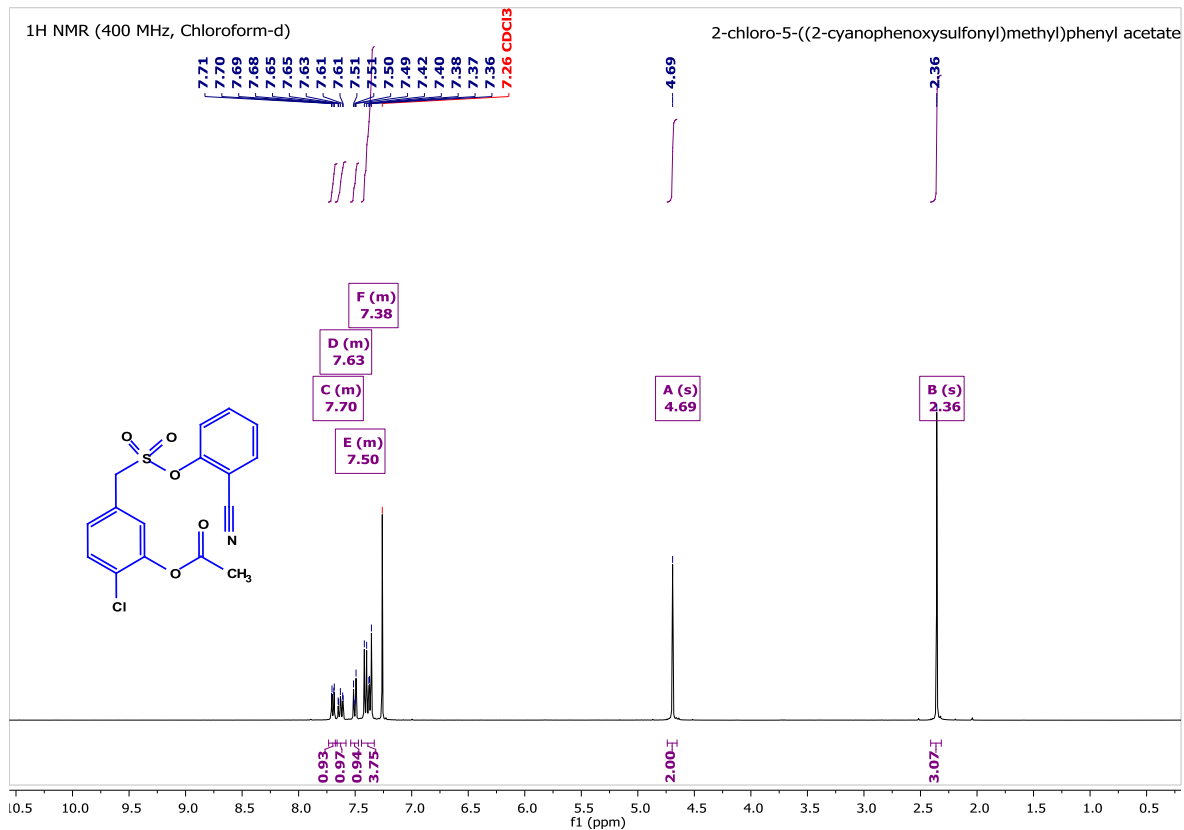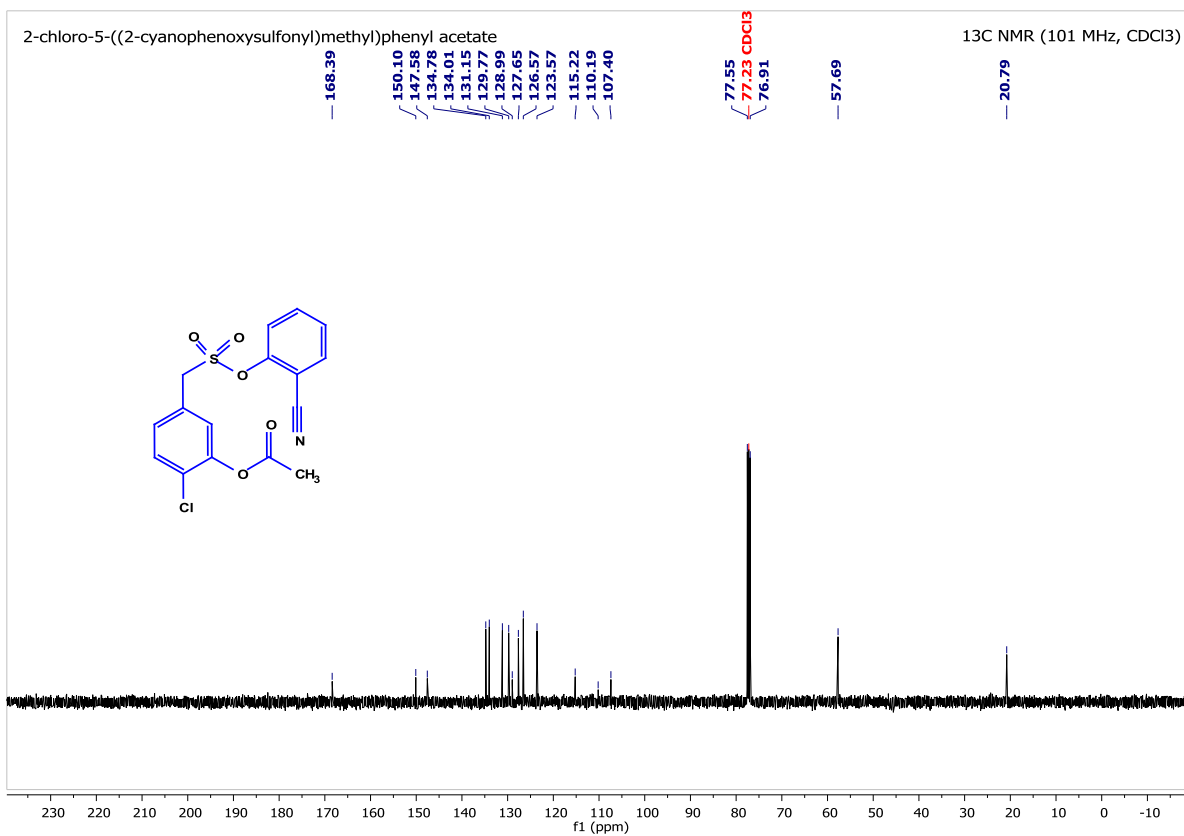

5-((2-cyanophenoxy)sulfonyl)methyl)-2-(trifluoromethylthio)phenyl acetate (2f):

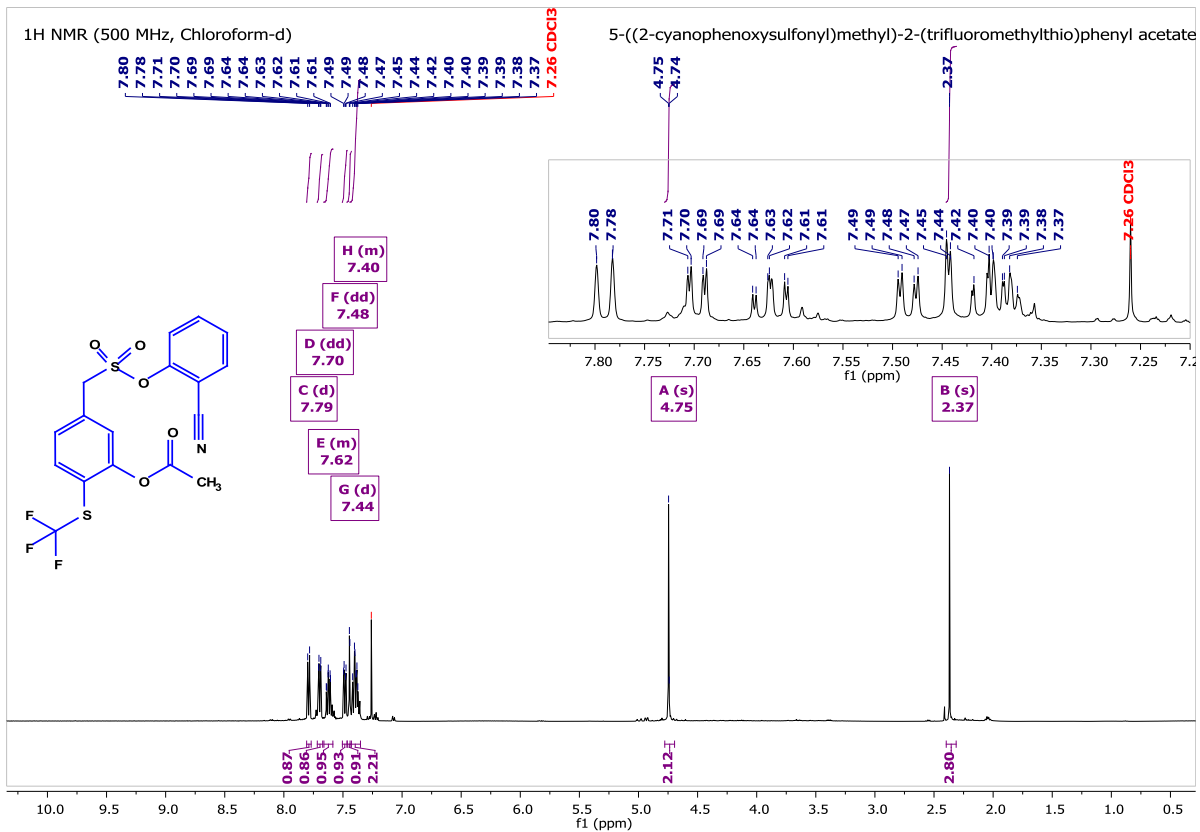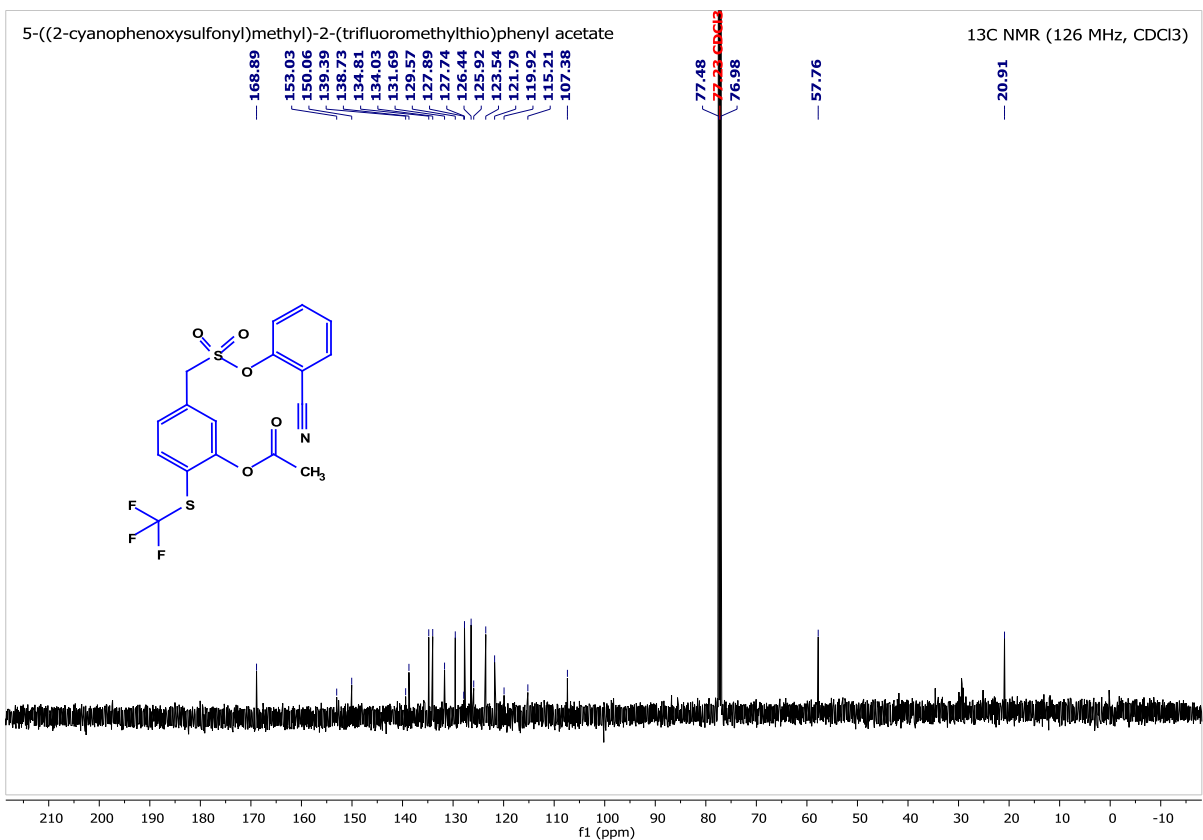

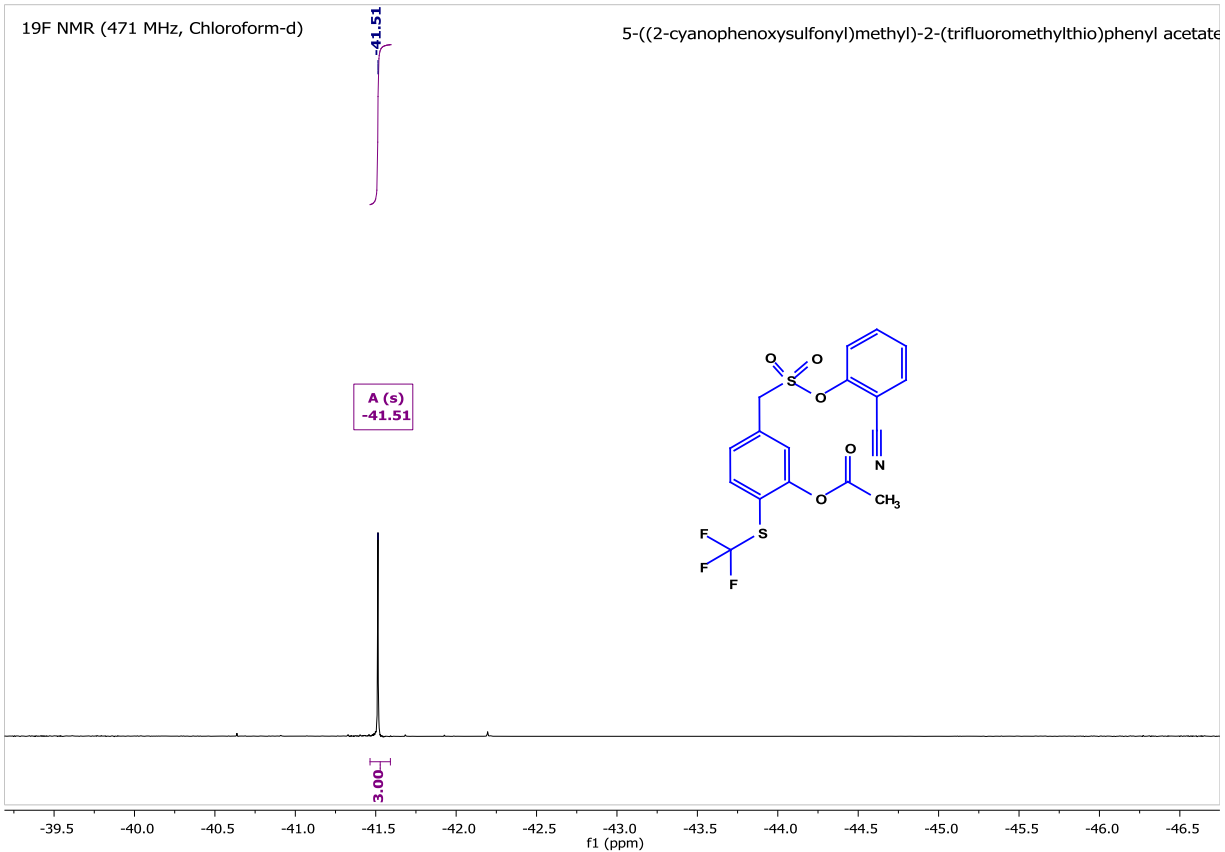

### 3-((2-cyanophenoxy)sulfonyl)methyl)-5-methylphenyl acetate (2g):

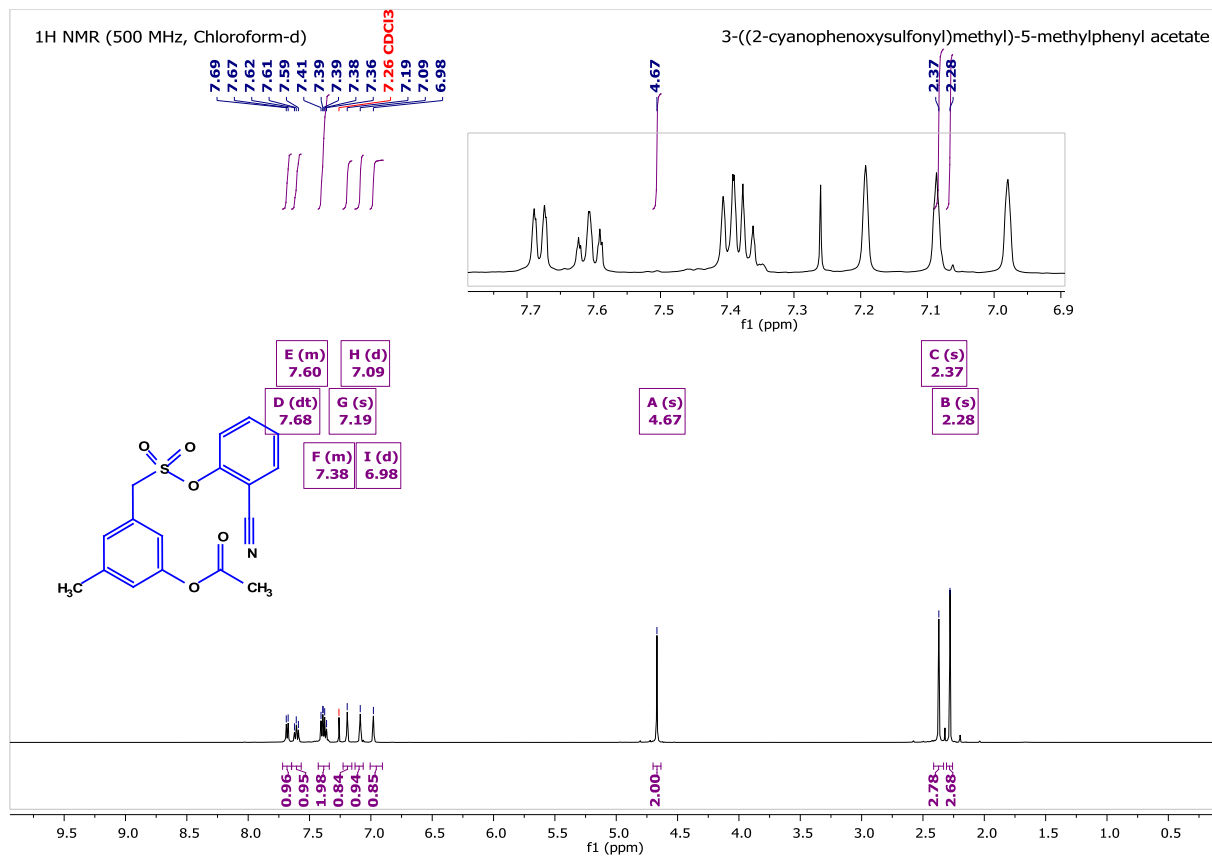

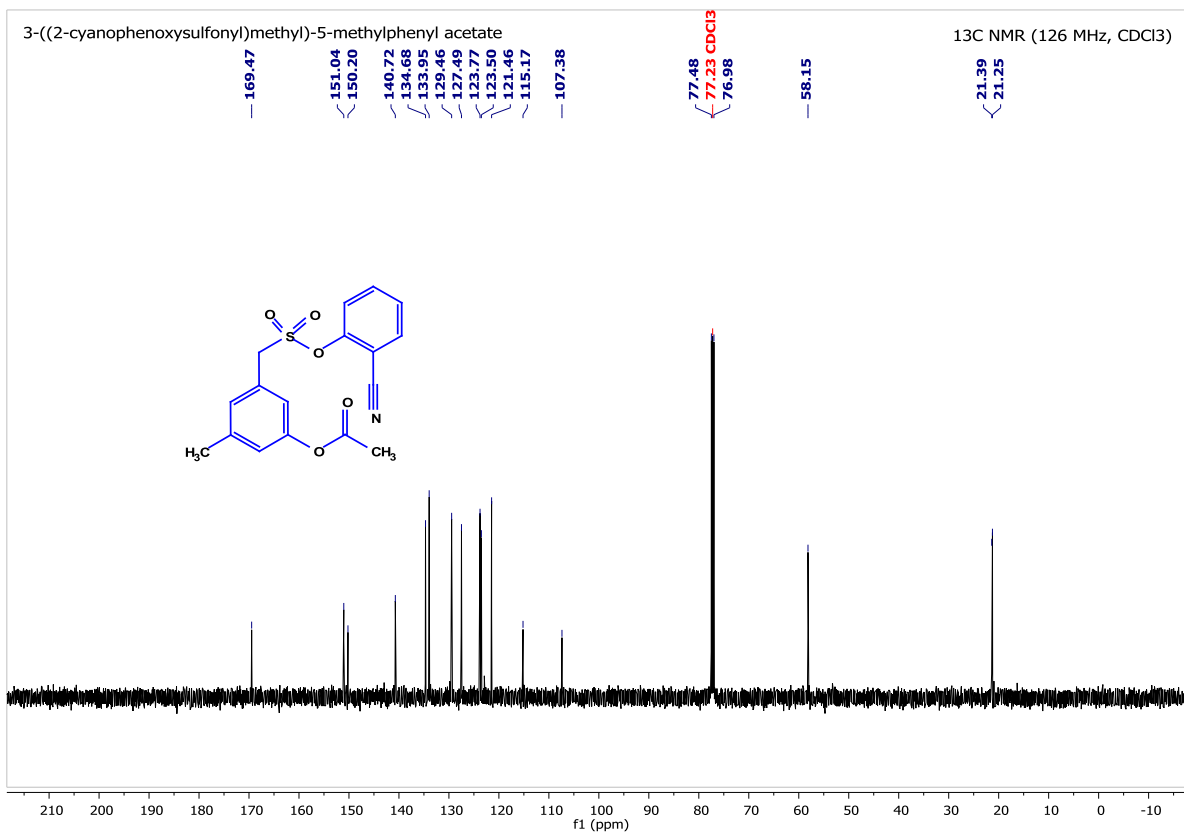

### 3-bromo-5-((2-cyanophenoxy)sulfonyl)methylphenyl acetate (2h):

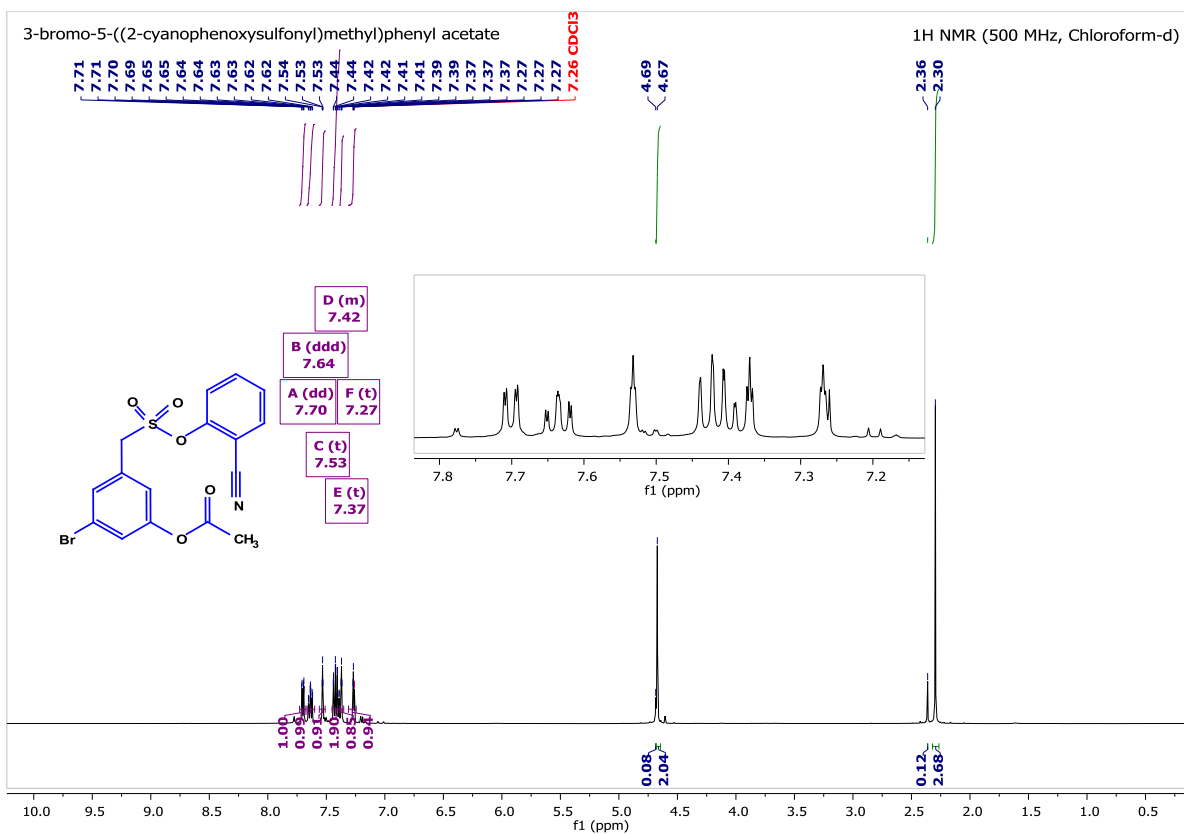

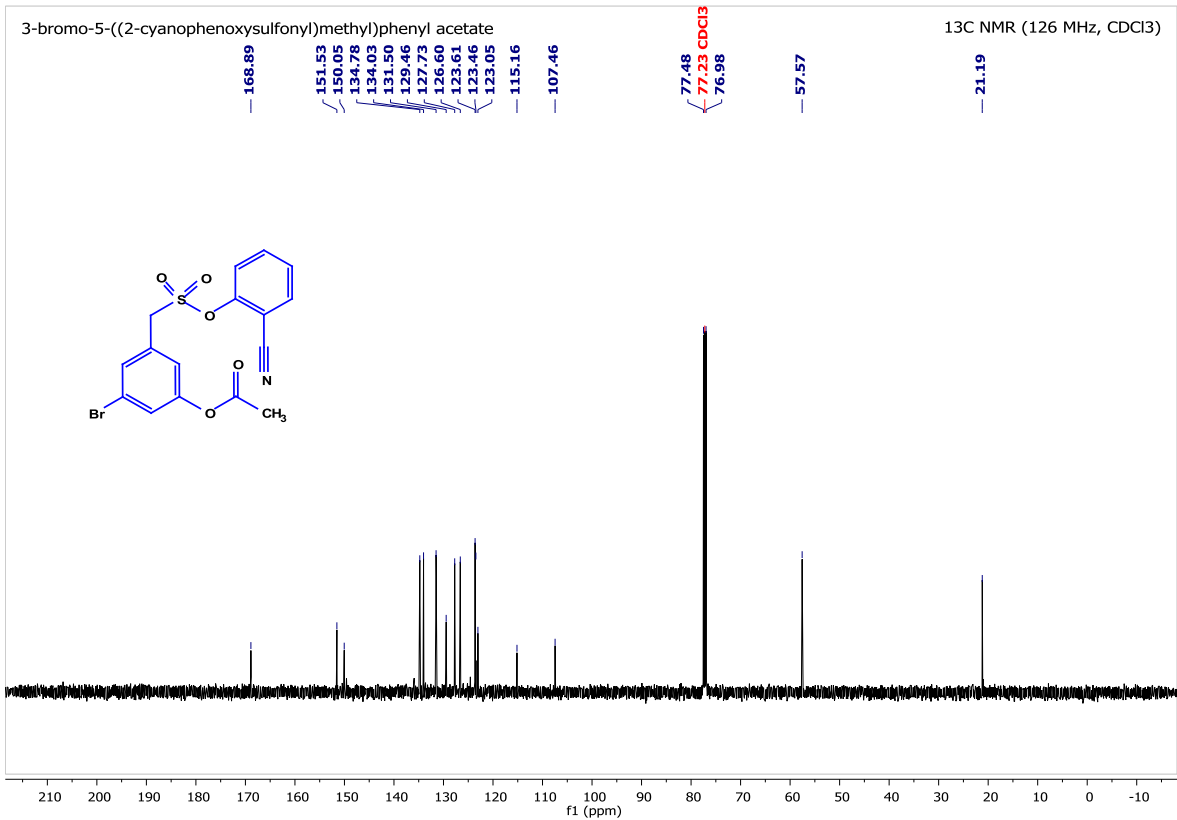

### 3-((2-cyanophenoxy)sulfonyl)methyl)-5-fluorophenyl acetate (2i):

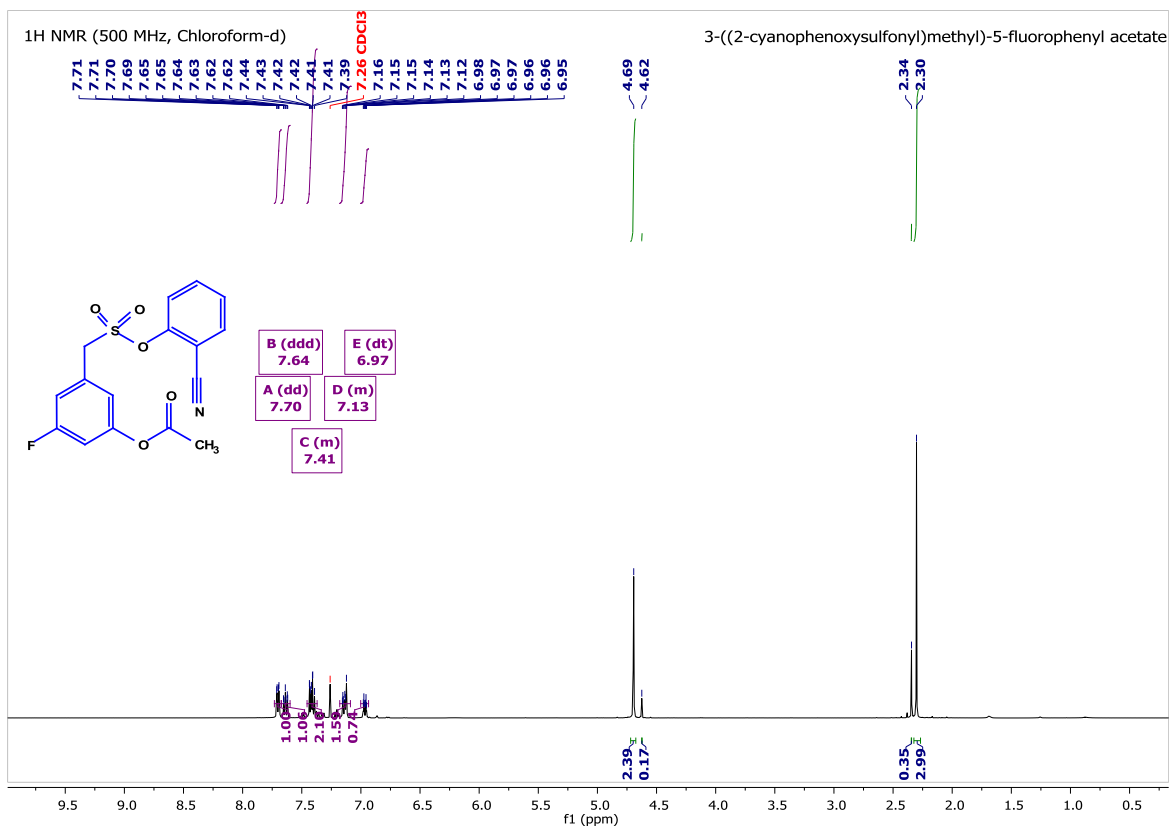

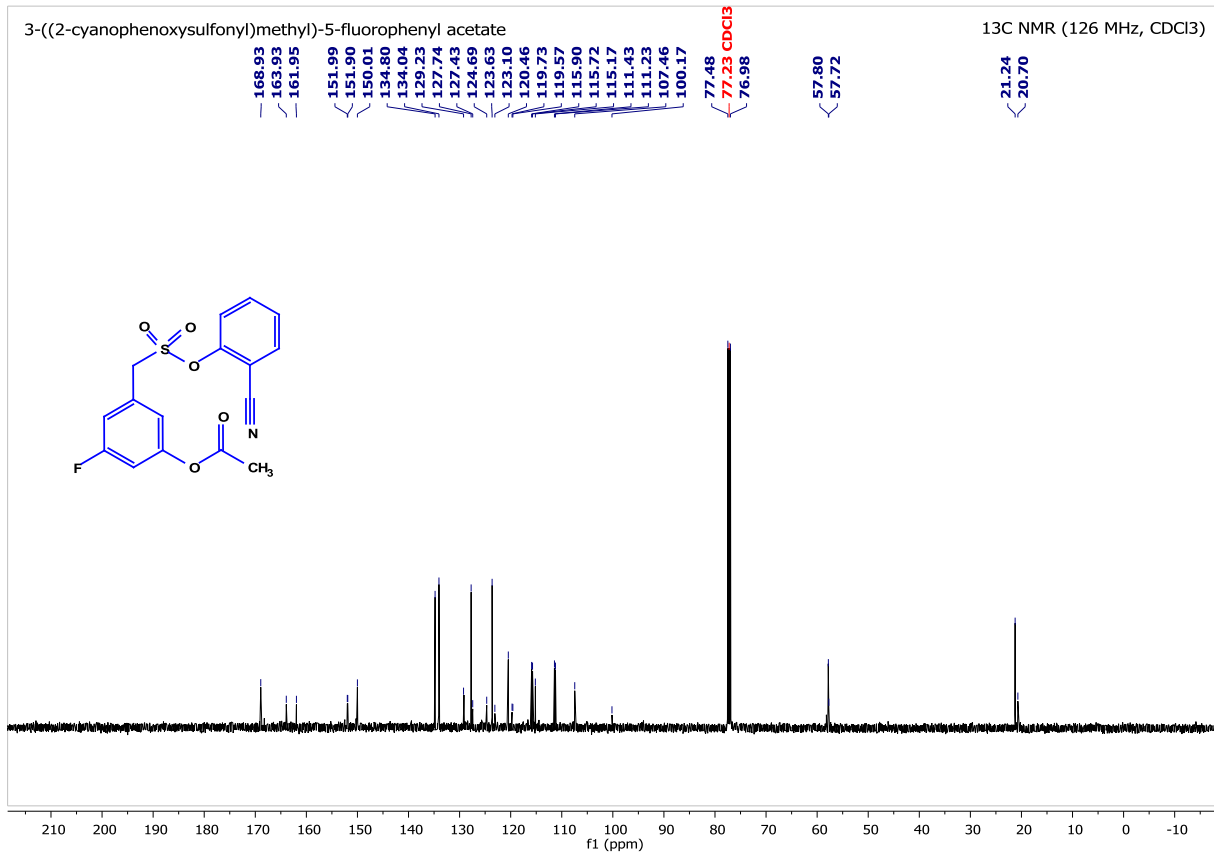

### 3-bromo-5-((2-cyanophenoxy)sulfonyl)methyl)-2-fluorophenyl acetate (2j):

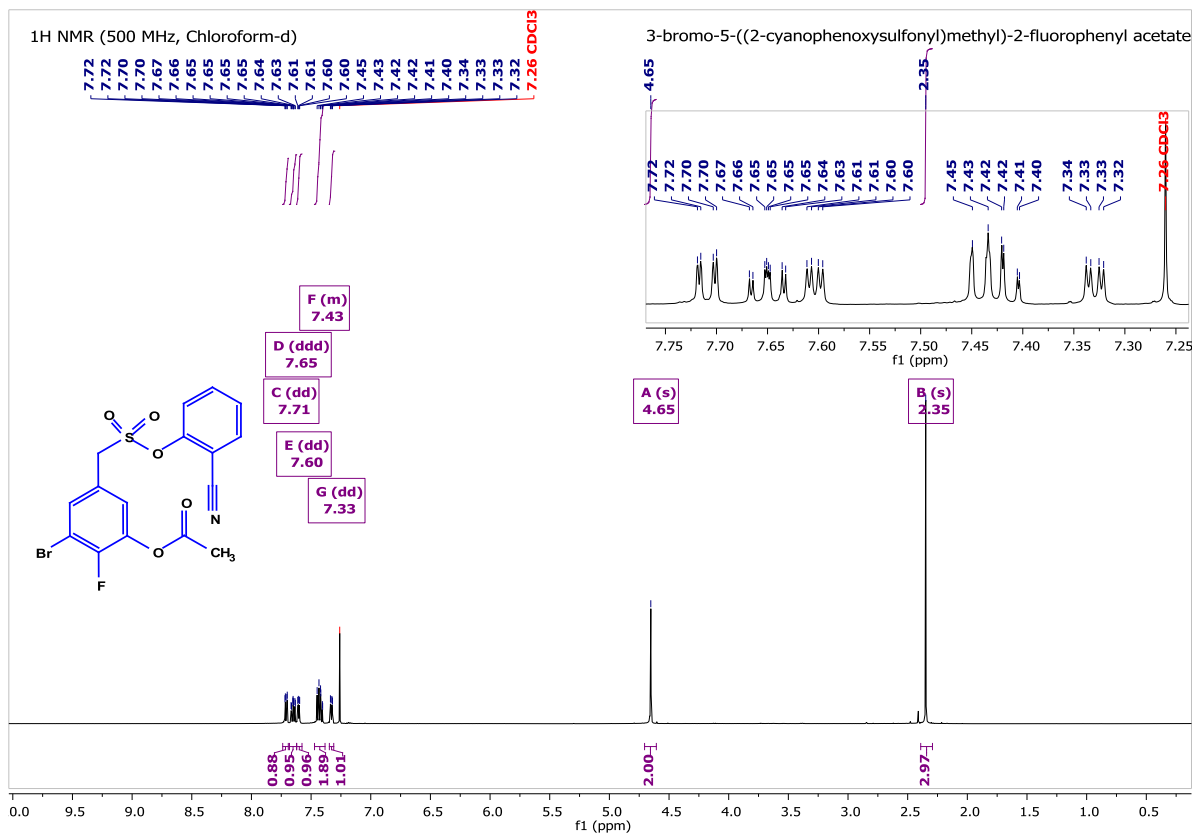

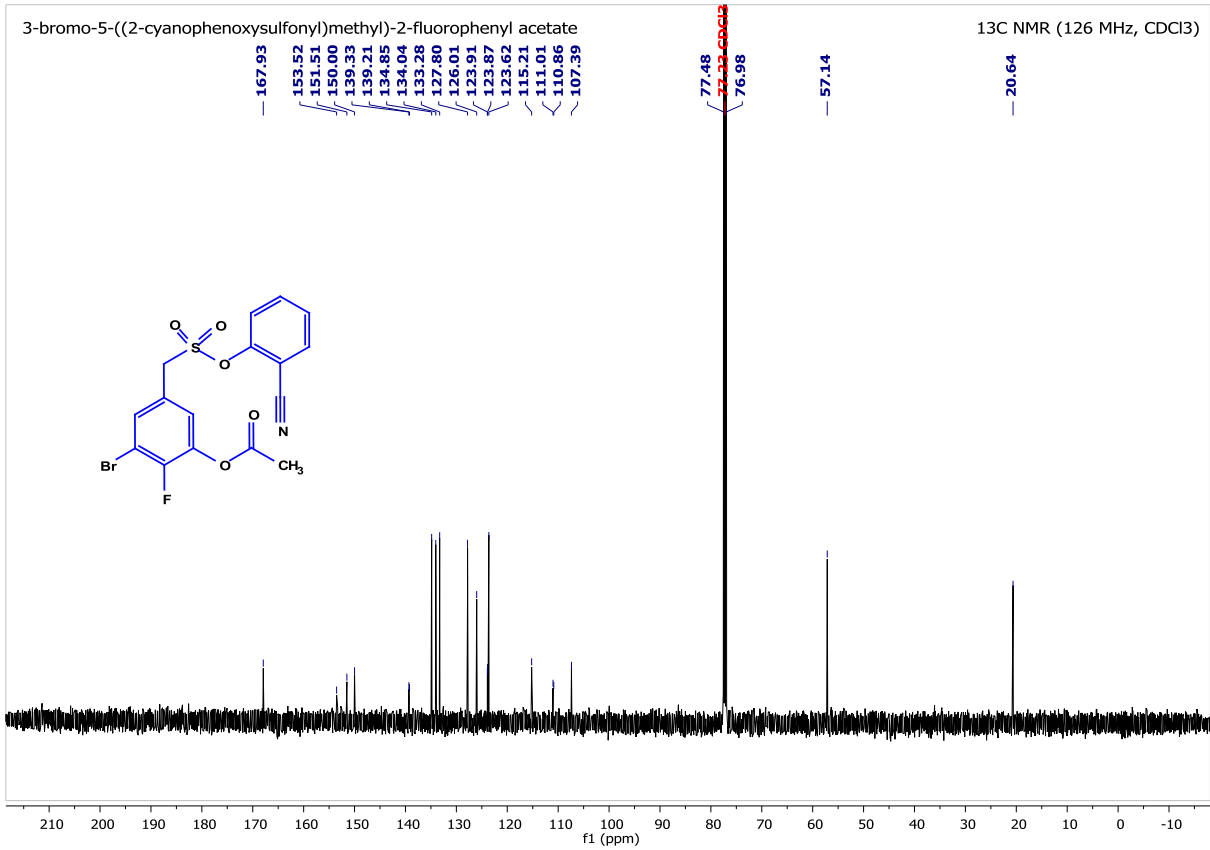

### 3-((2-cyanophenoxy)methyl)-4-methylphenyl acetate (2k):

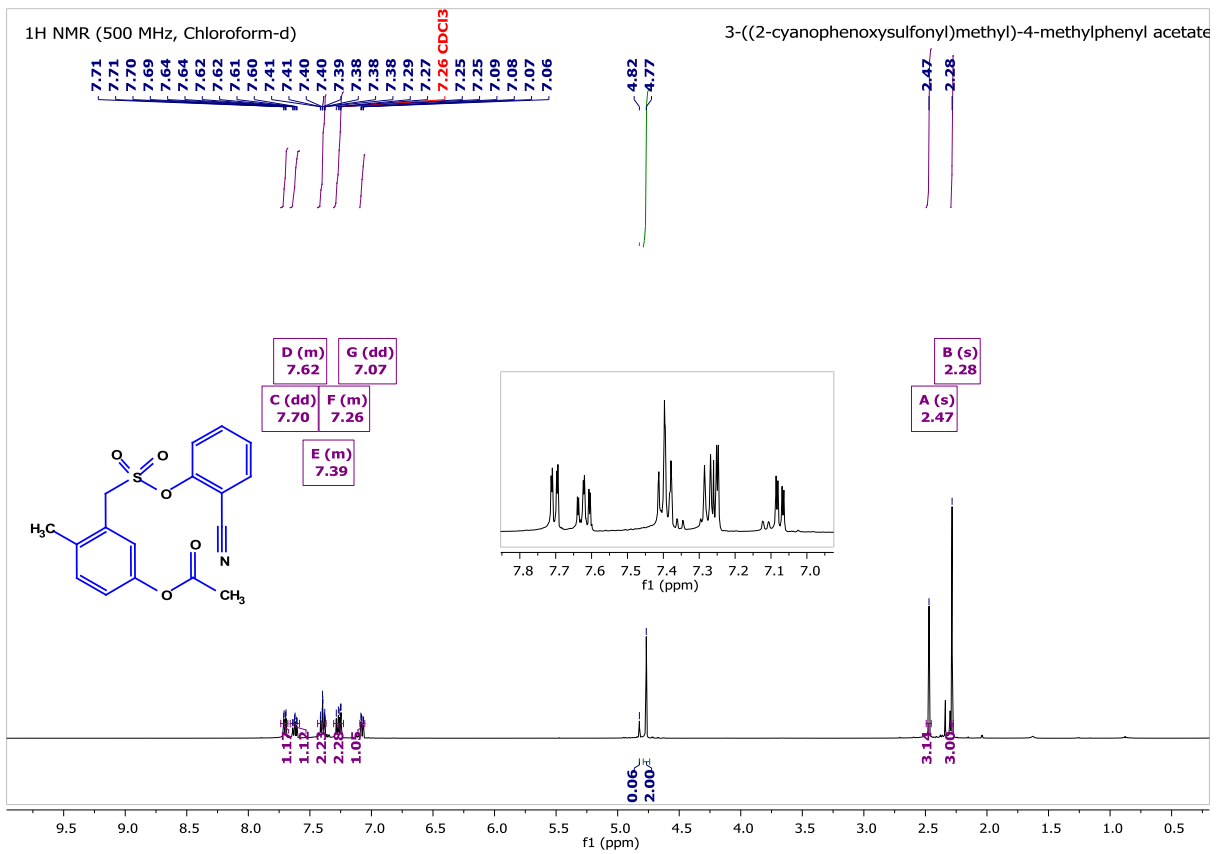

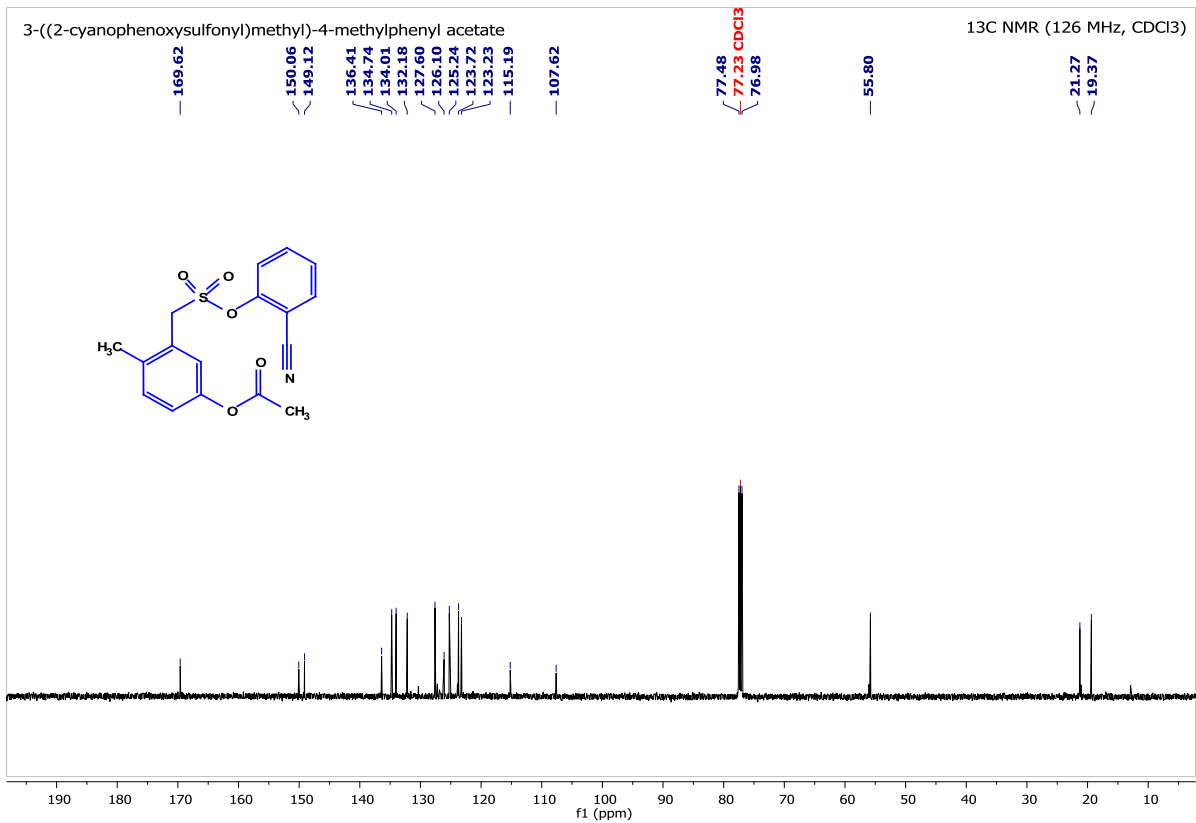

**4-chloro-3-((2-cyanophenoxy)sulfonyl)methyl)phenyl acetate (2l):**

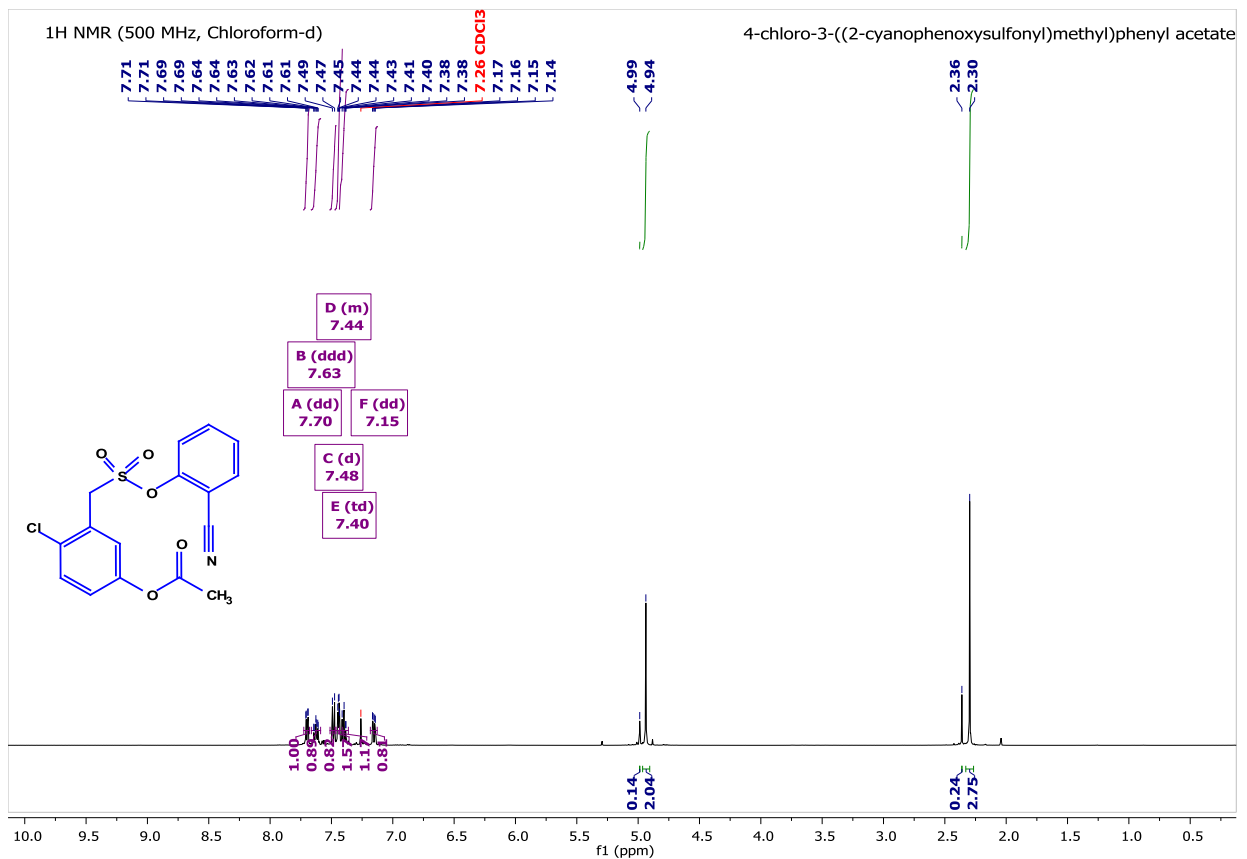



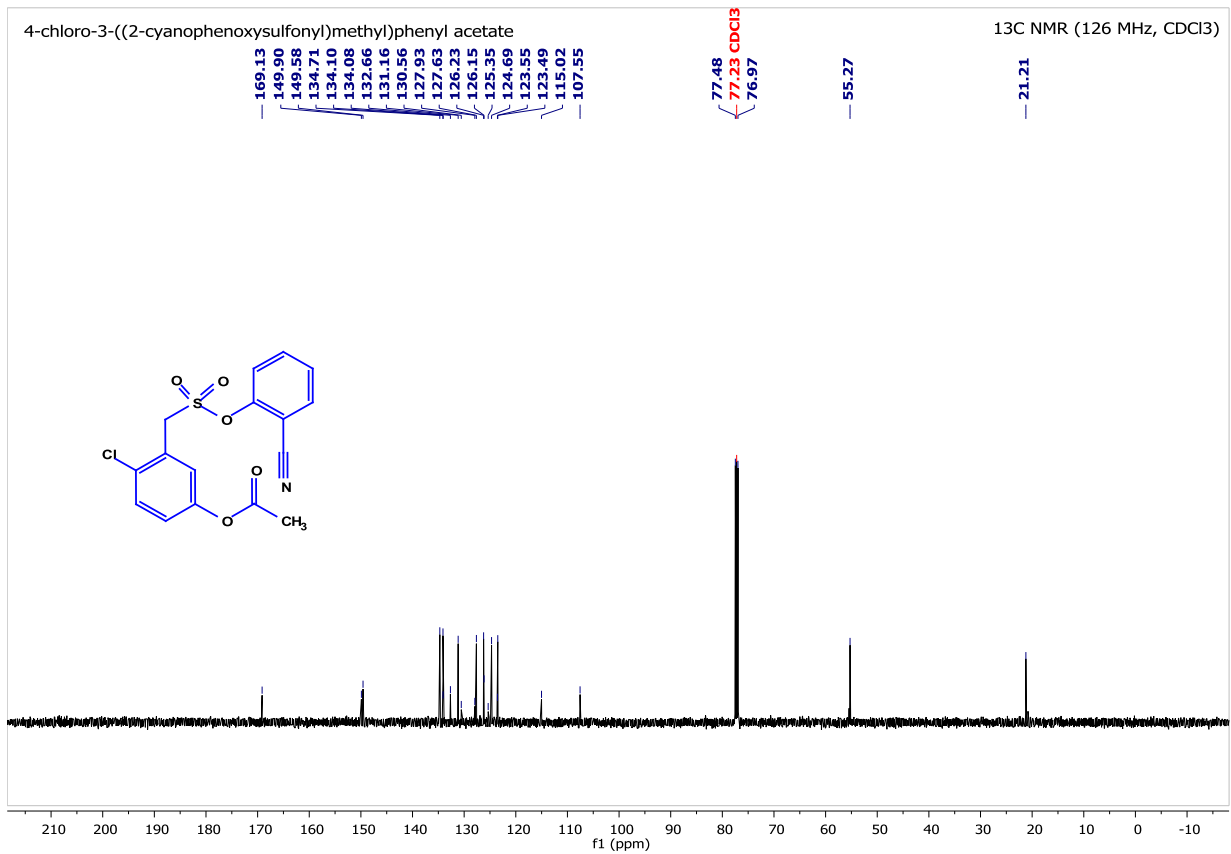

**3-((2-cyanophenoxy)sulfonyl)methyl)-4-(trifluoromethoxy)phenyl acetate (2m):**

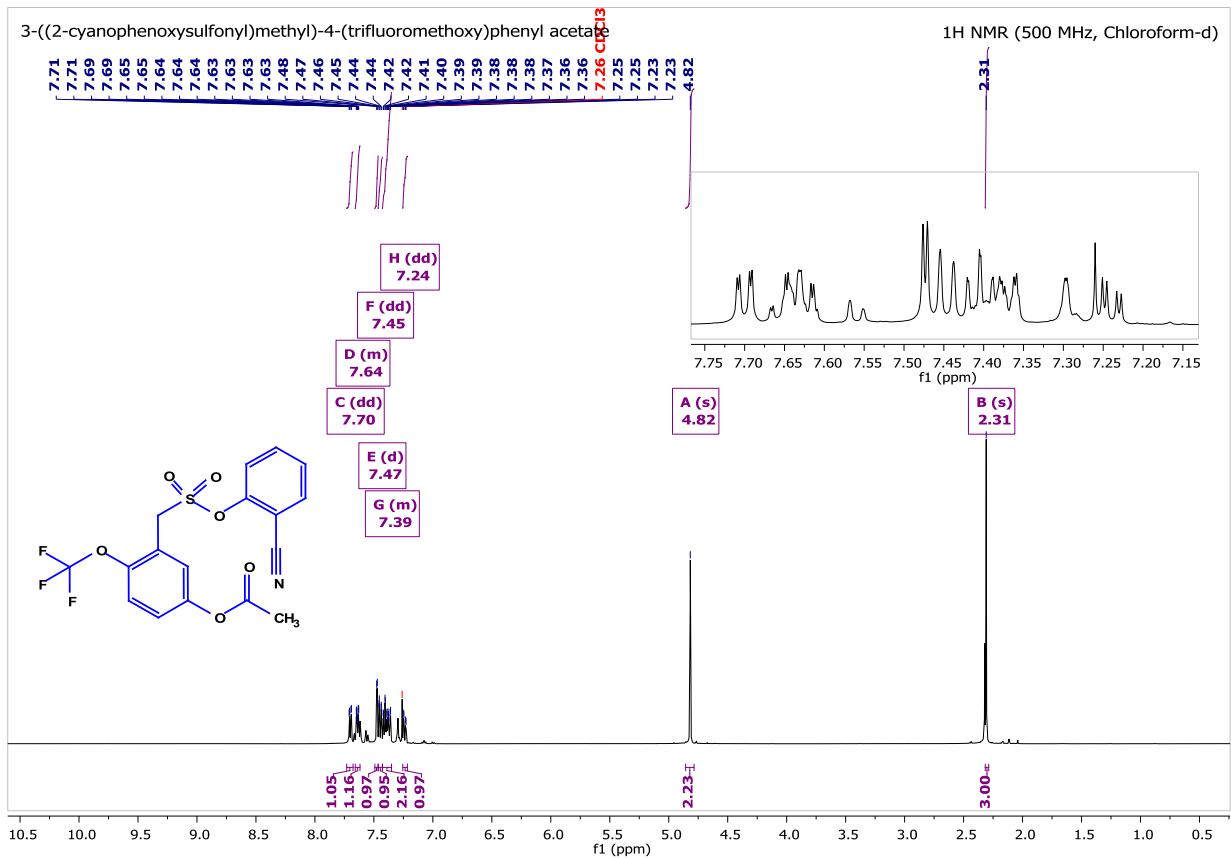

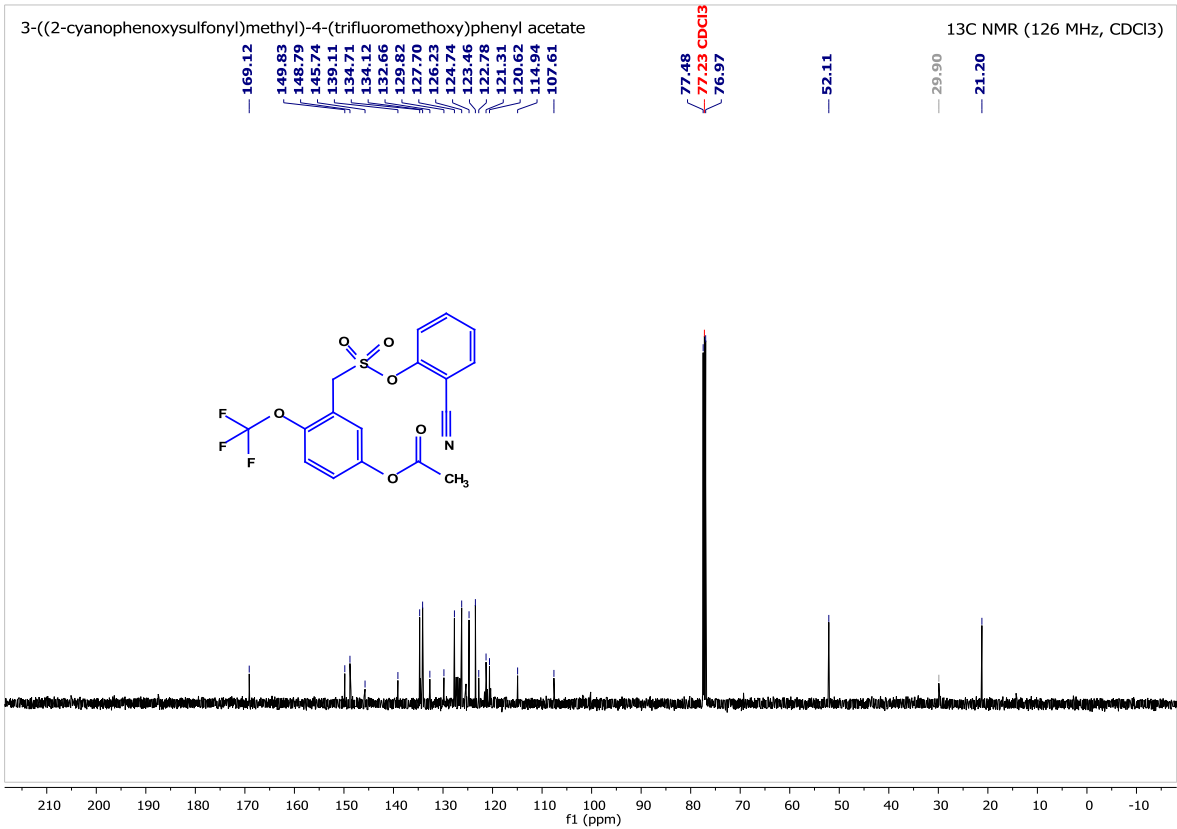

### 3-((2-cyanophenoxy)sulfonyl)methyl-2,4-difluorophenyl acetate (2n):

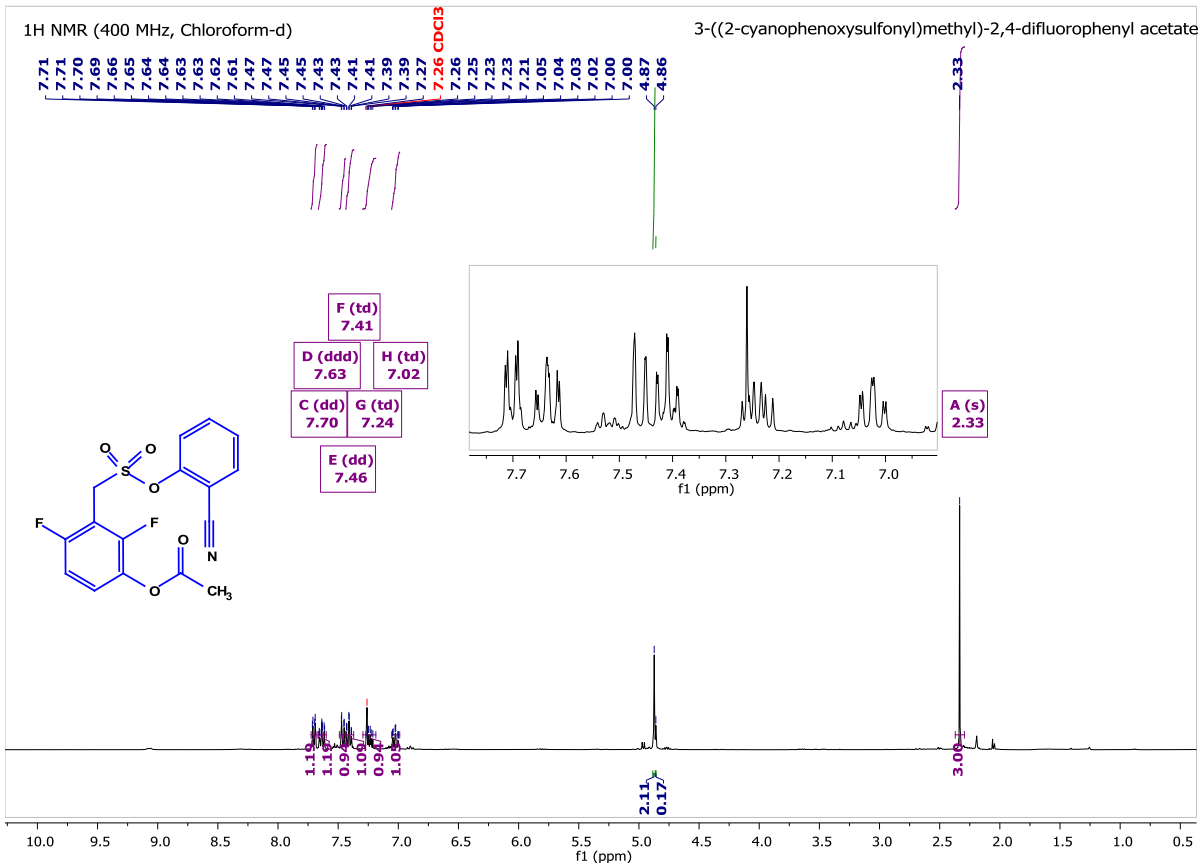

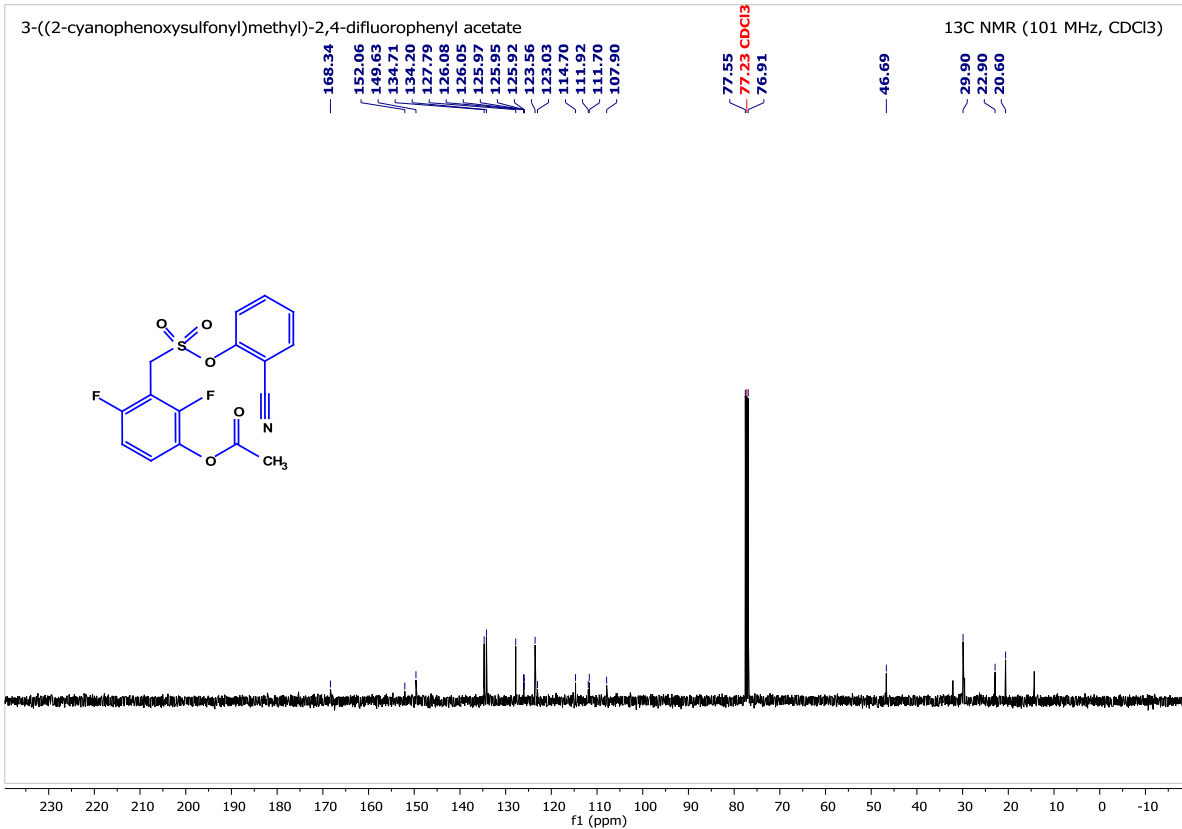

5-((2-cyanophenoxy)sulfonyl)methyl)-2-fluorophenyl acetate (2o):

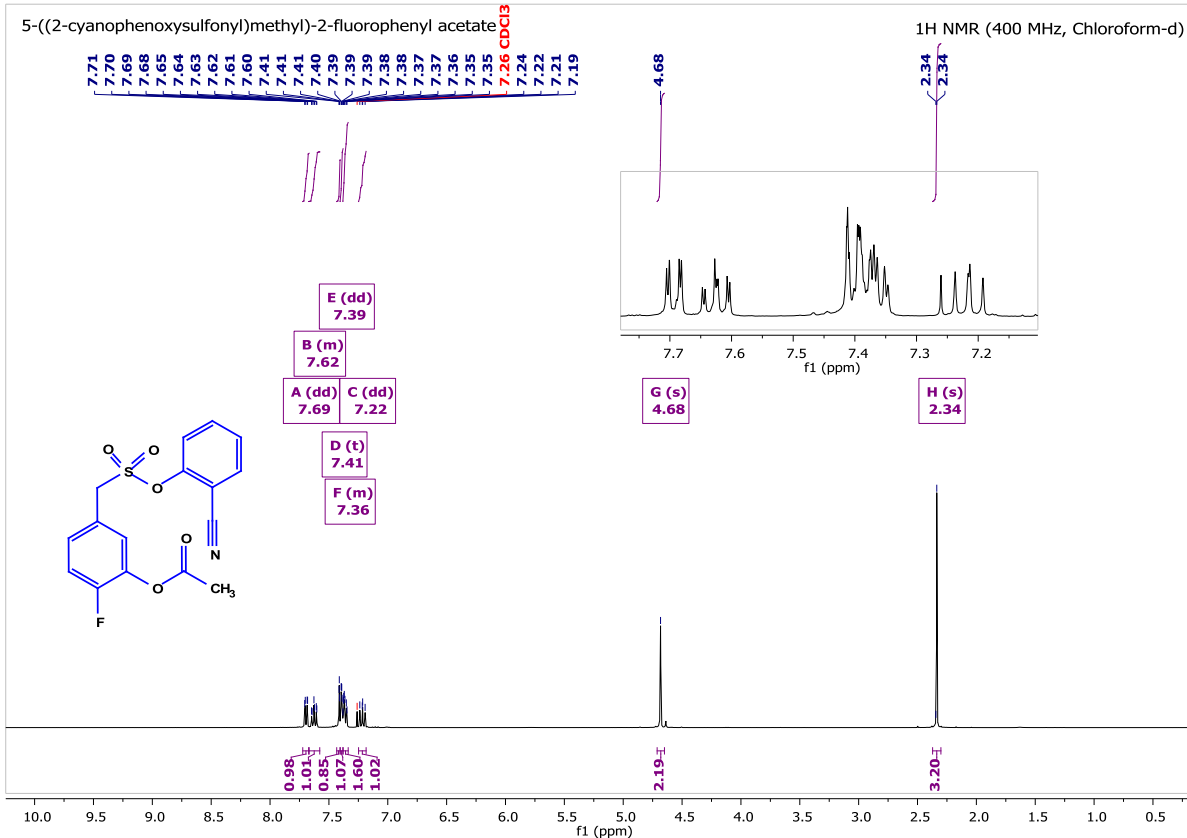

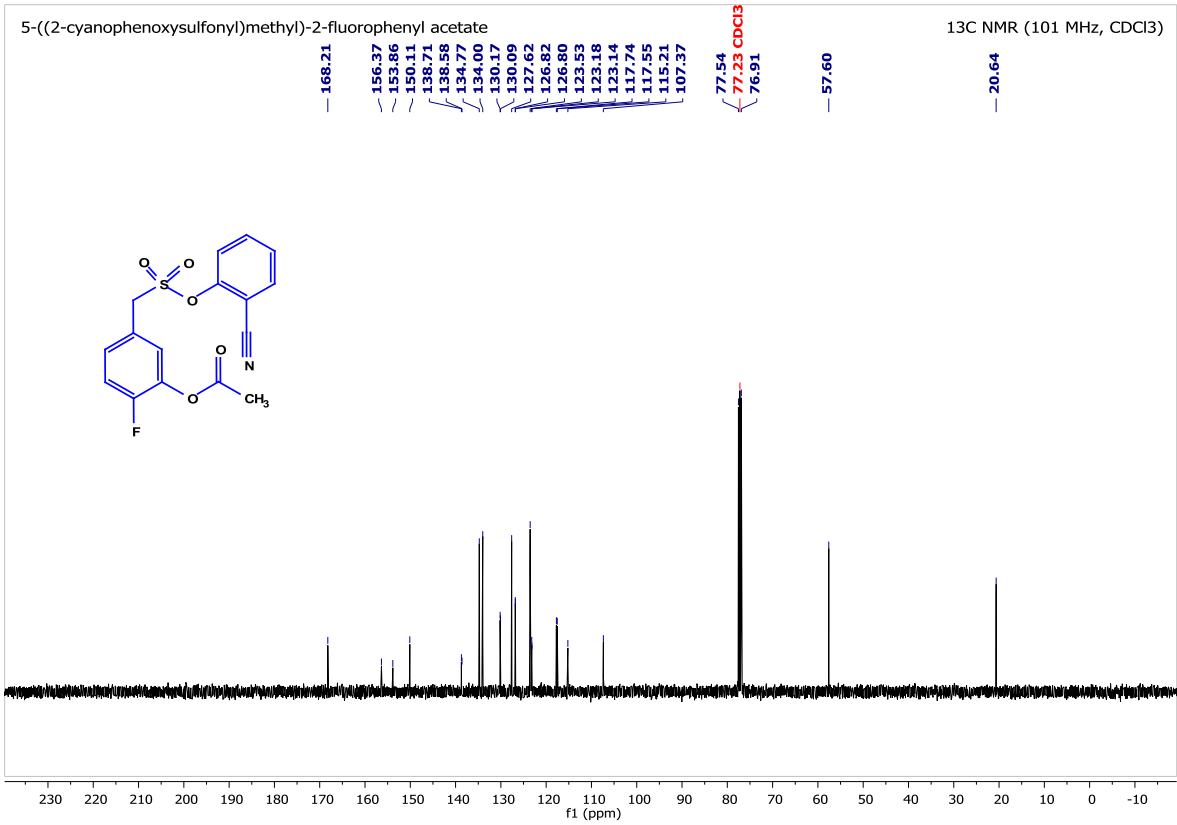

### 3,4-dichloro-5-((2-cyanophenoxy)sulfonyl)methyl)phenyl acetate (2p):

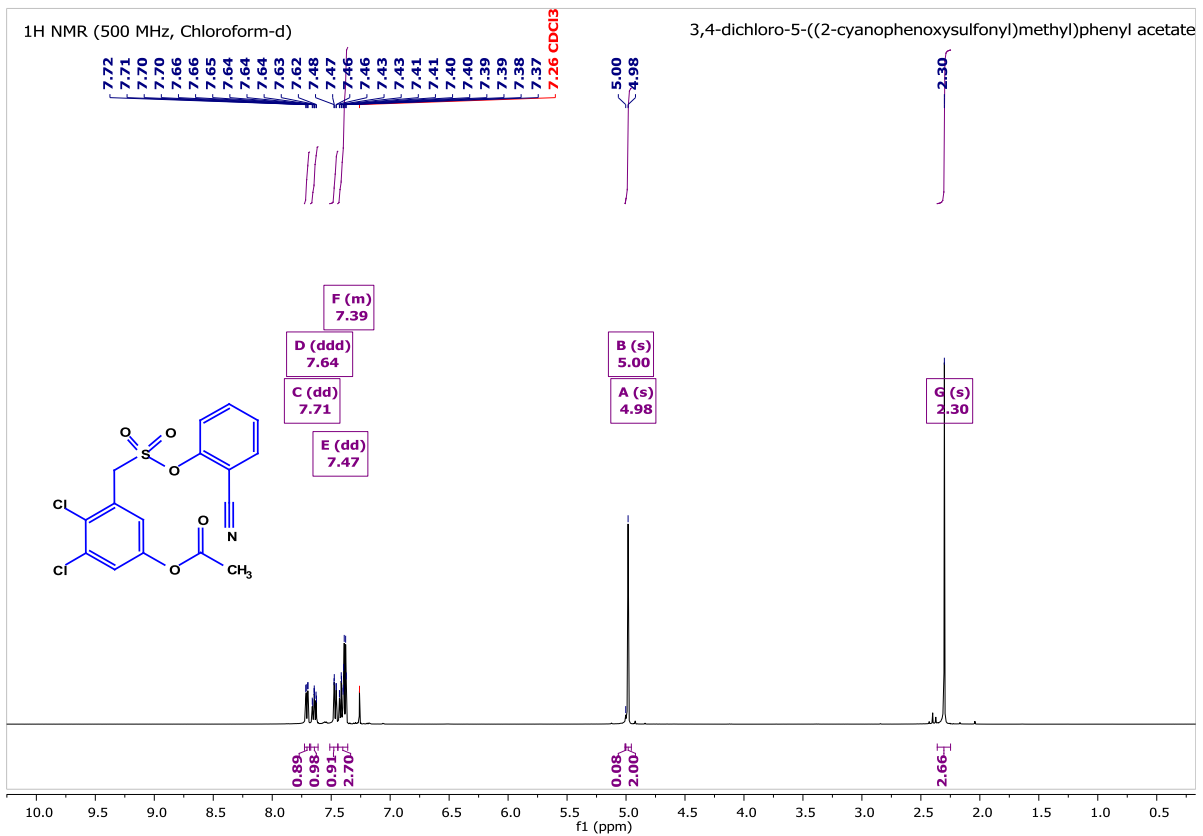

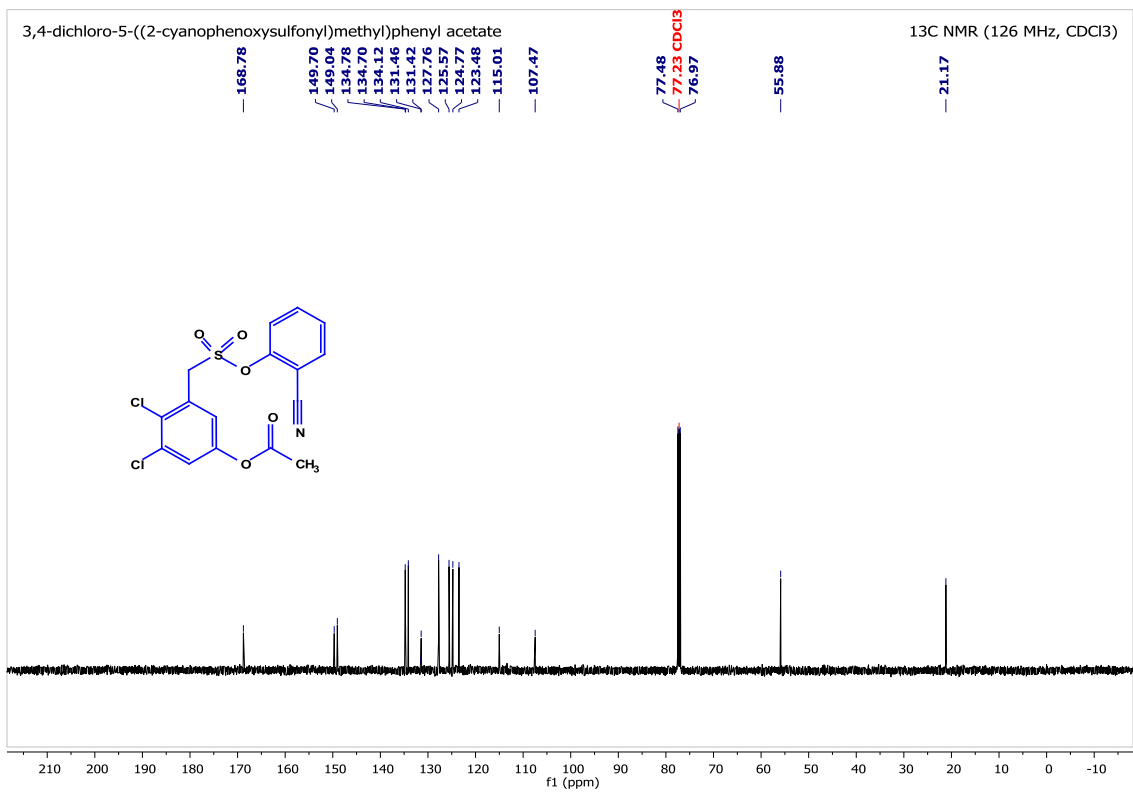

**Application:**

**(E)-ethyl 3-(3-acetoxy-5-((2-cyanophenoxy)sulfonyl)methyl)phenyl)acrylate:**

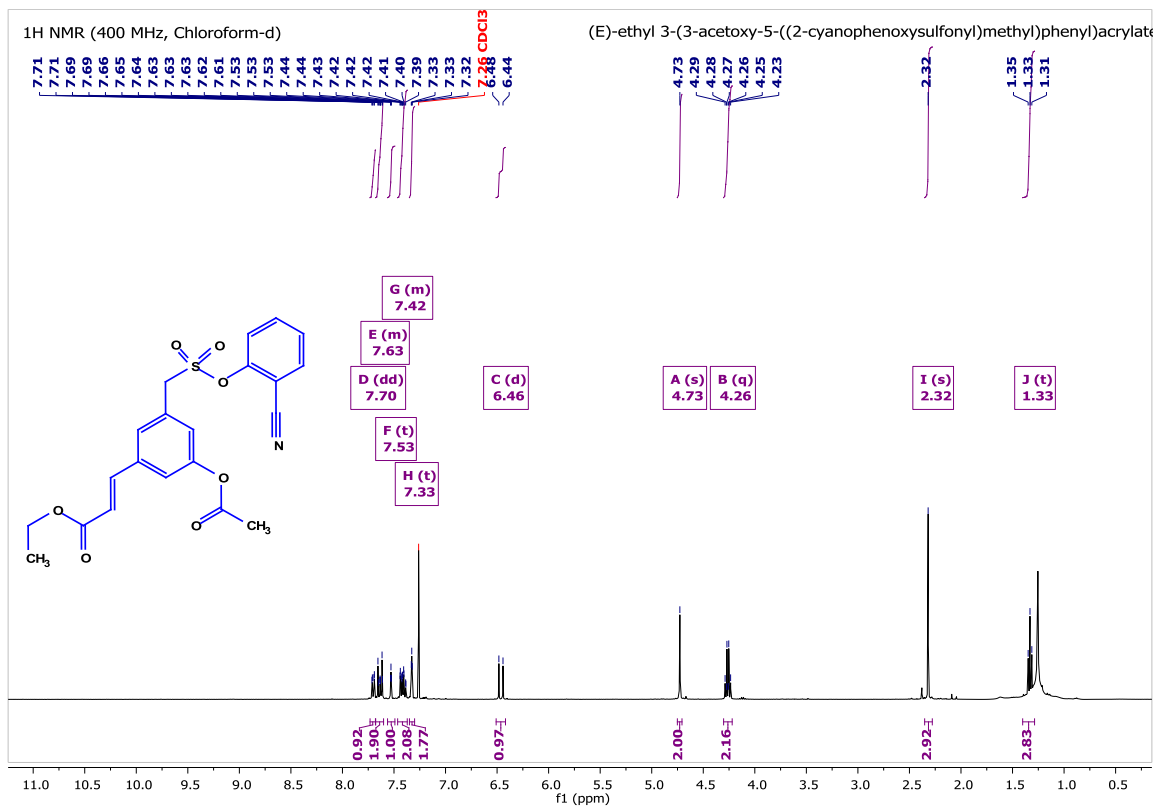

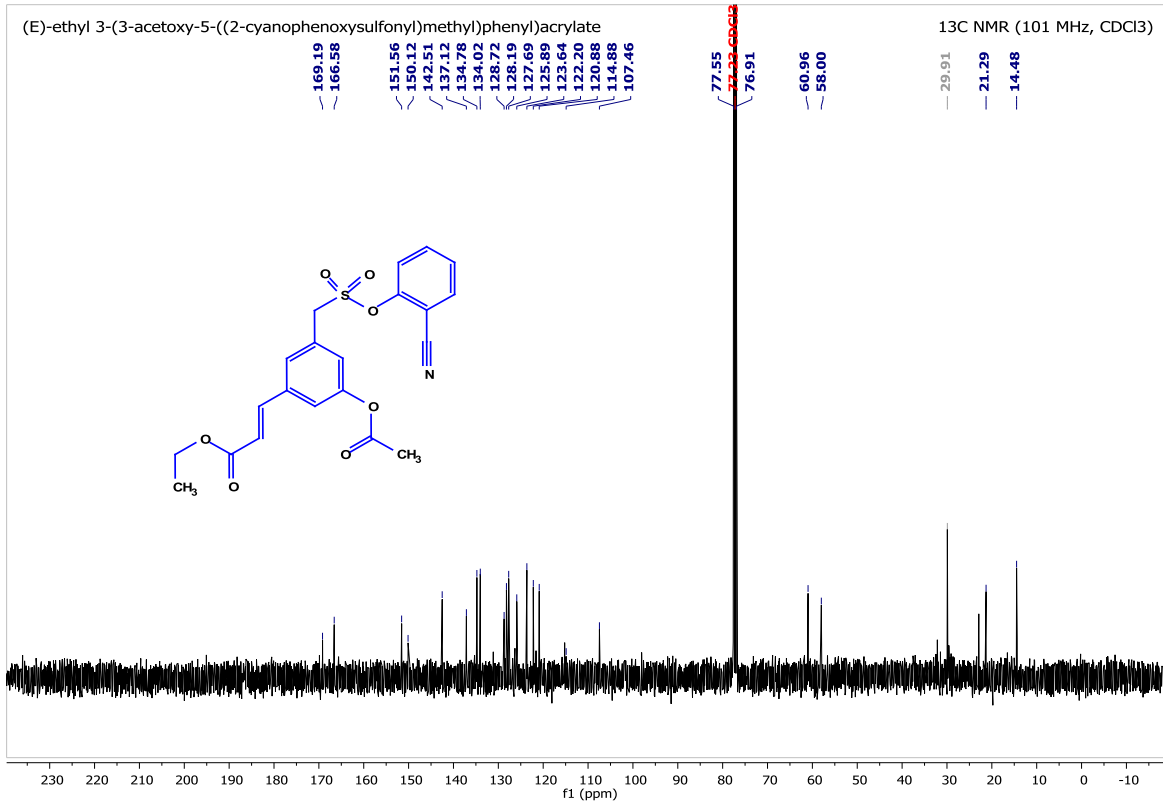

**(E)-ethyl 3-(3-((2-cyanophenoxy)sulfonyl)methyl)-5-hydroxyphenyl)acrylate:**

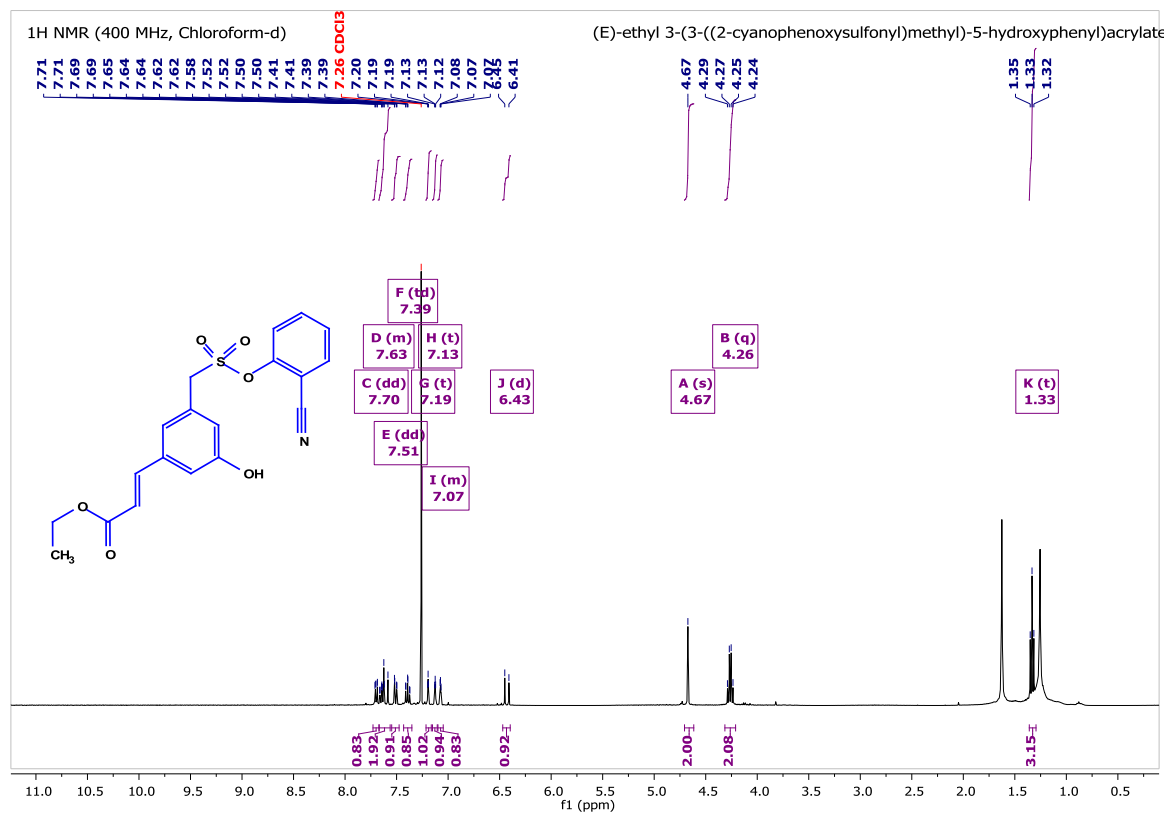

**(E)-3-styrylphenyl acetate:**

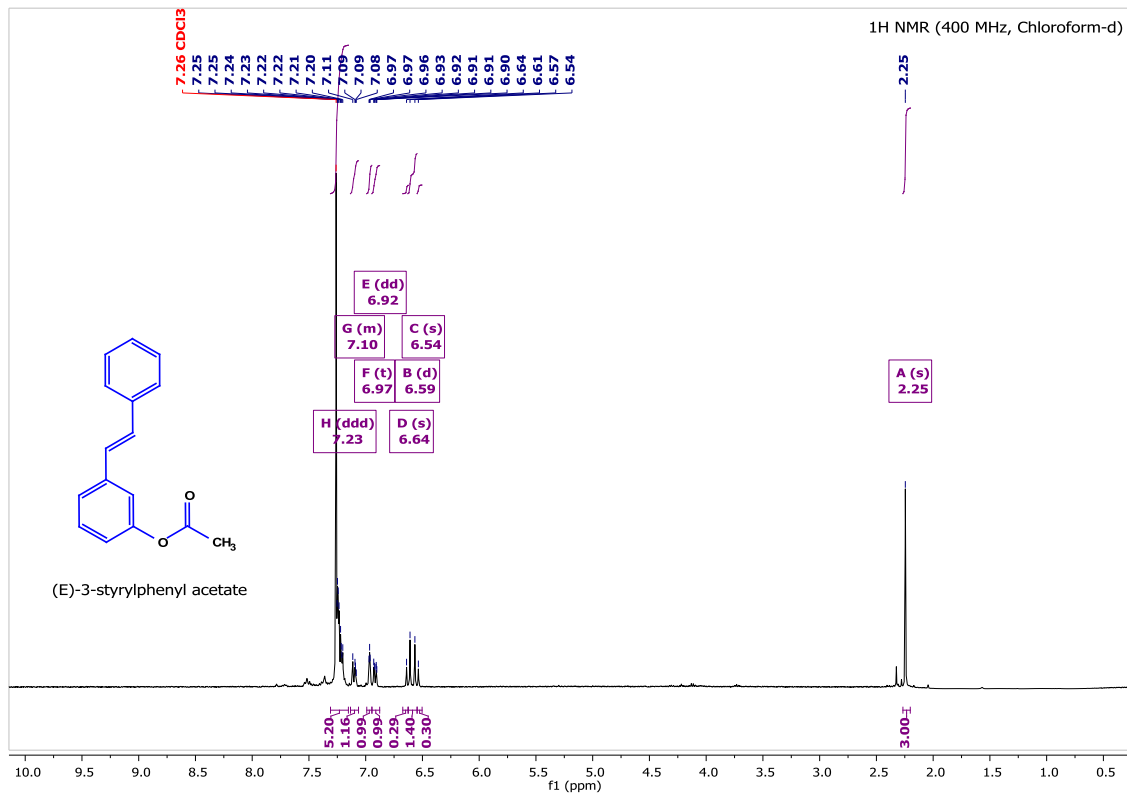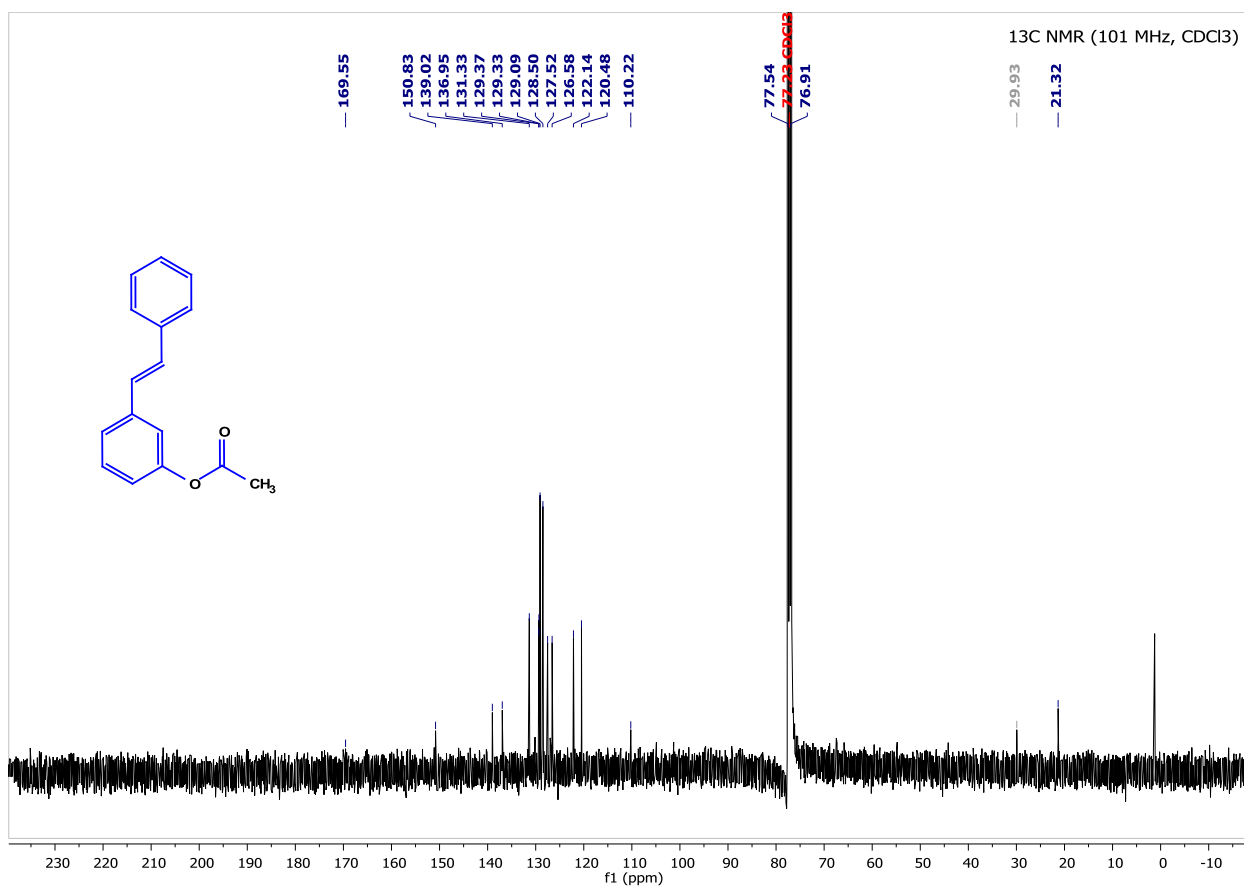

**(Z)-3-(2-(cyclohexa-1,5-dienyl)vinyl)phenyl acetate:**

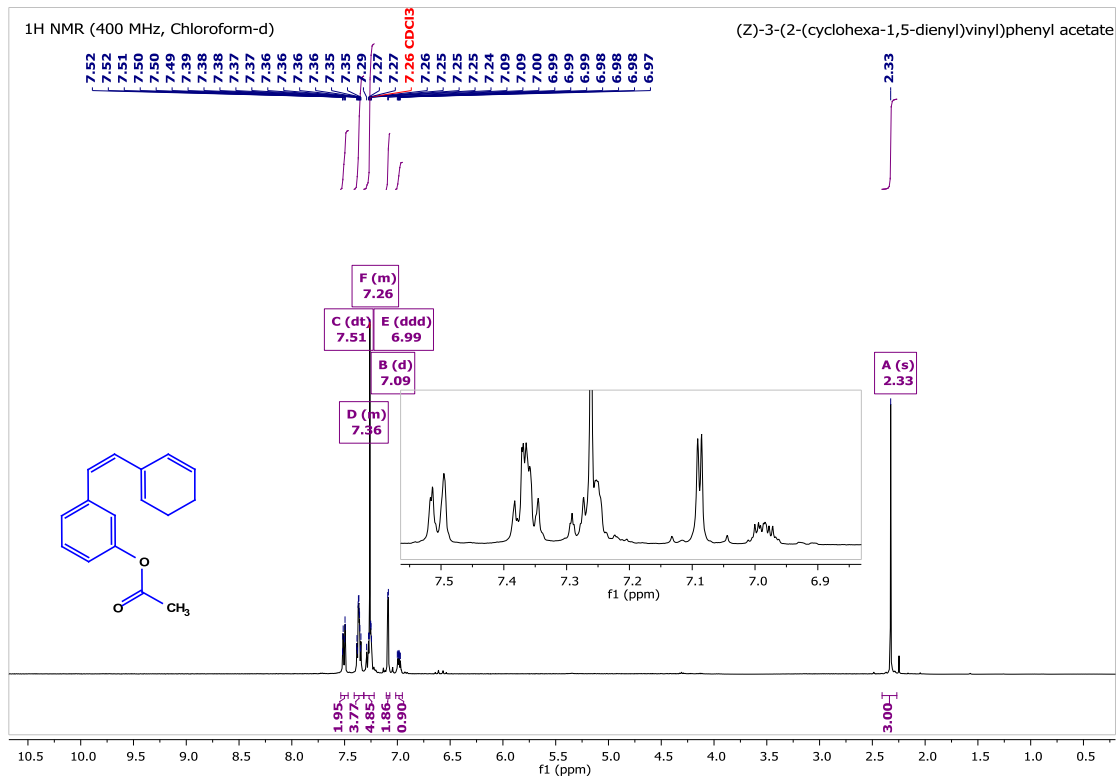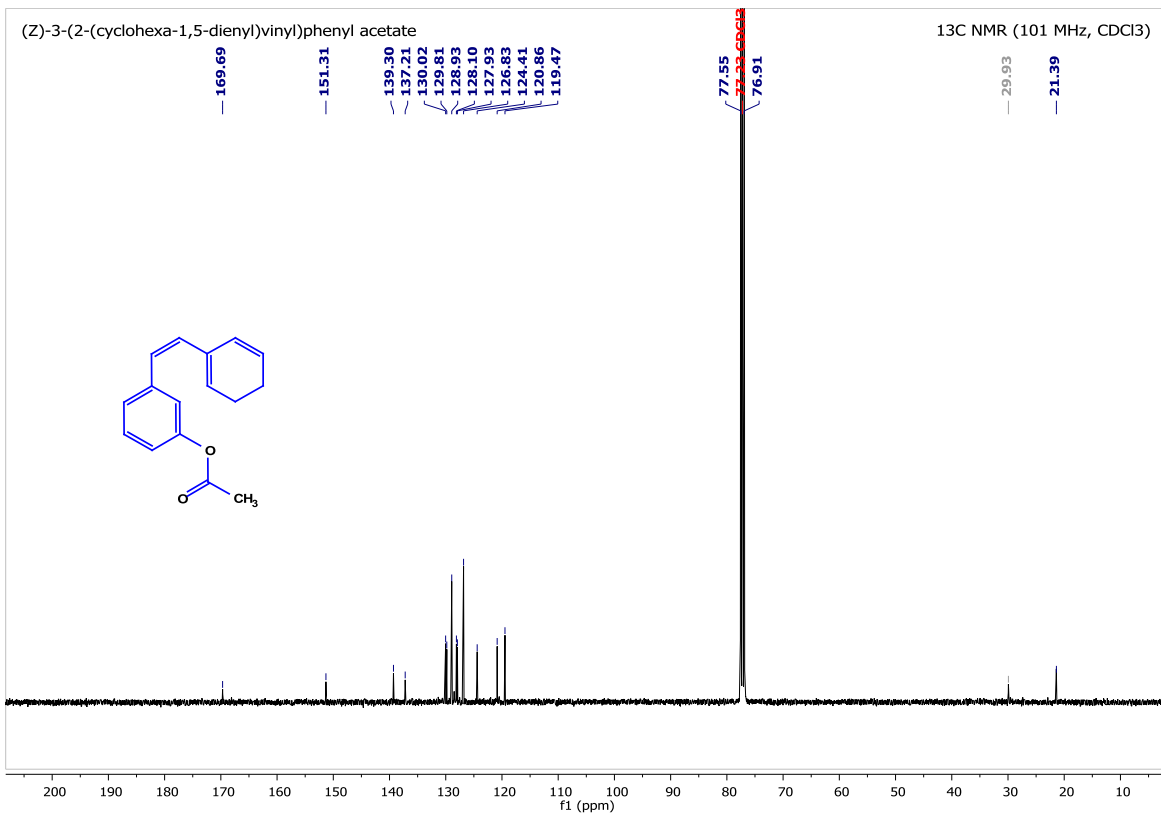



### (E)-3-styrylphenol:

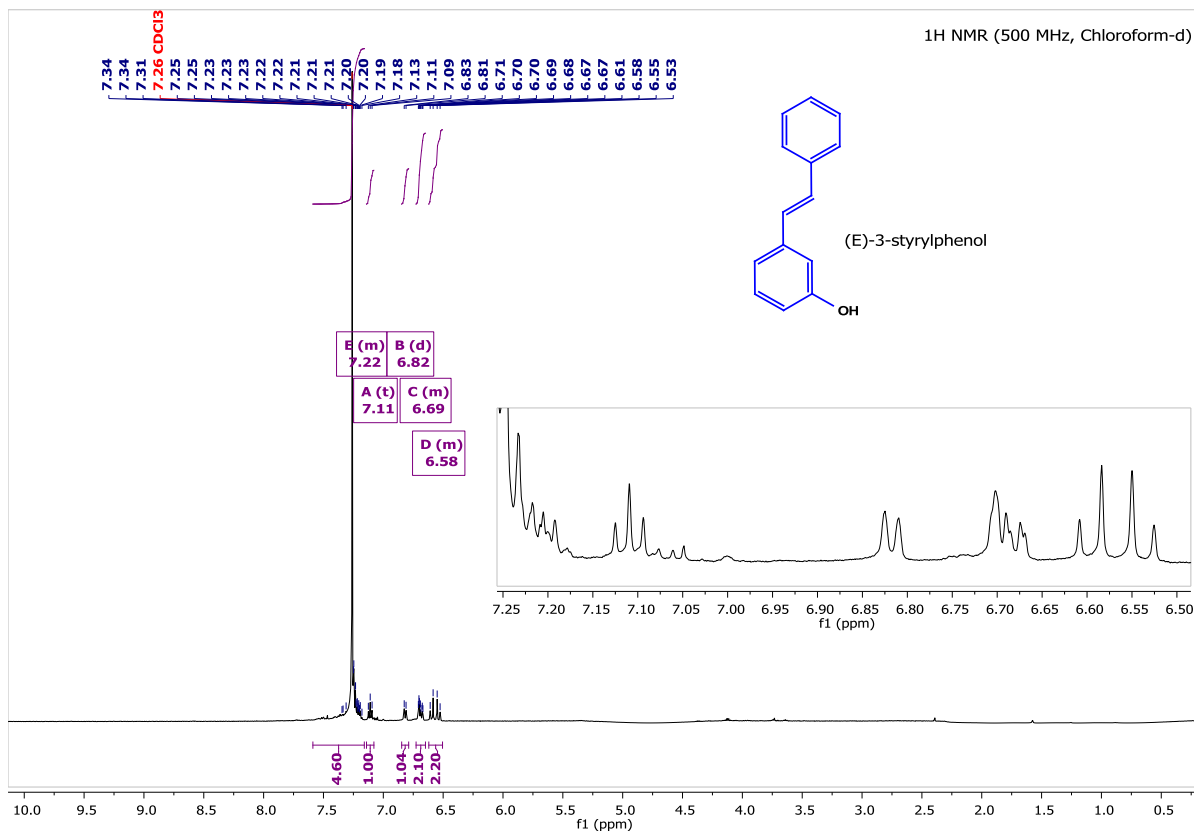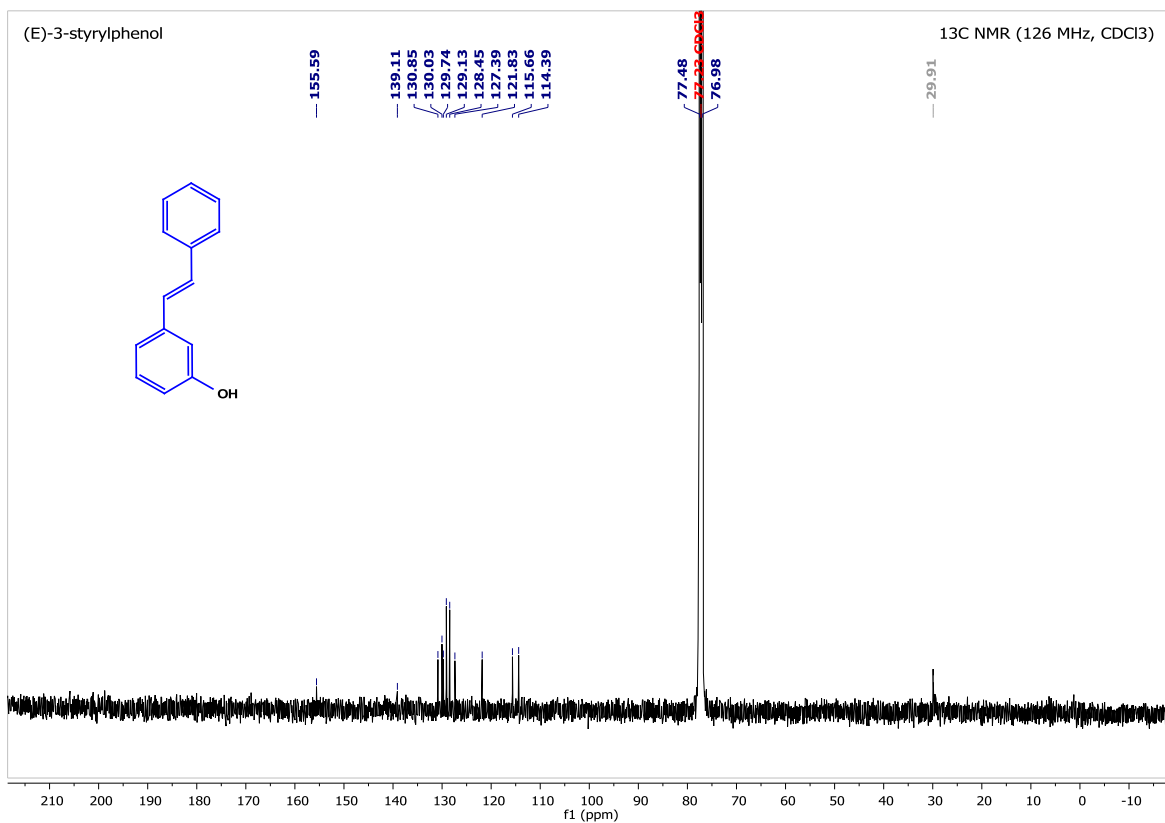

# (Z)-3-styrylphenol:

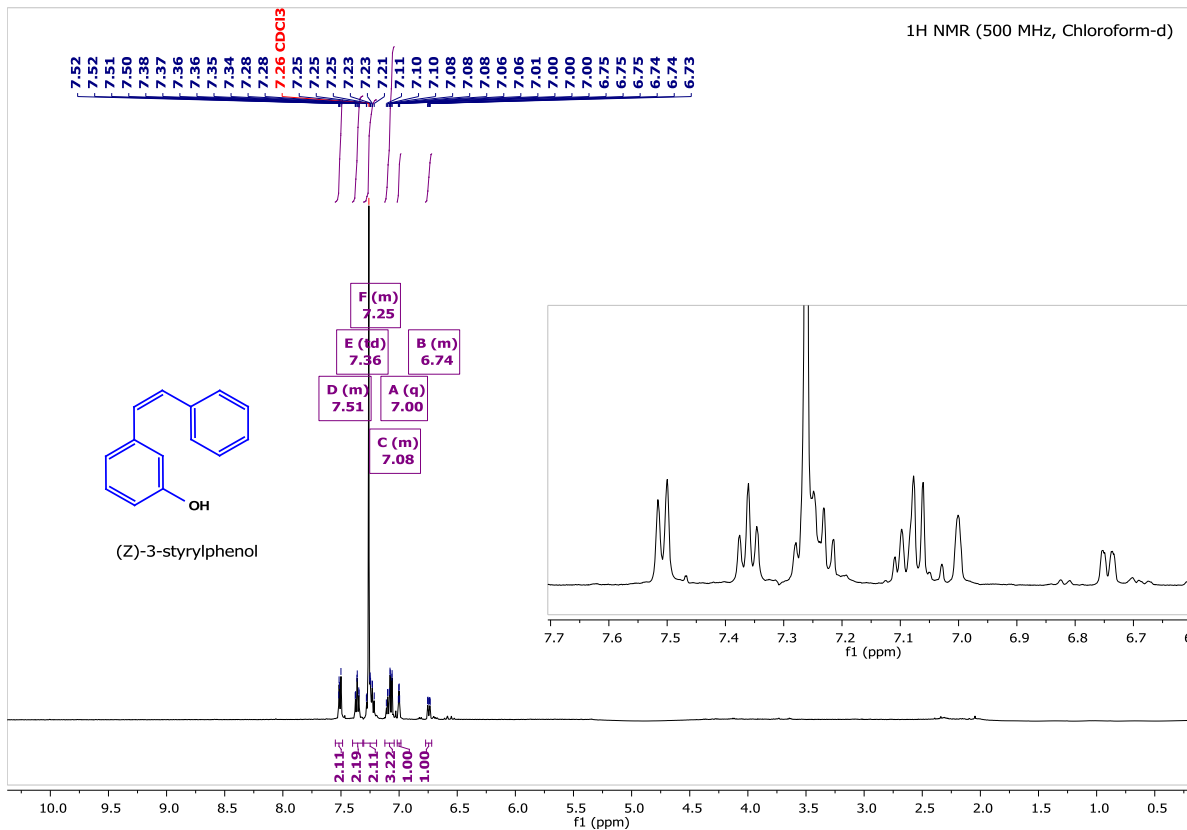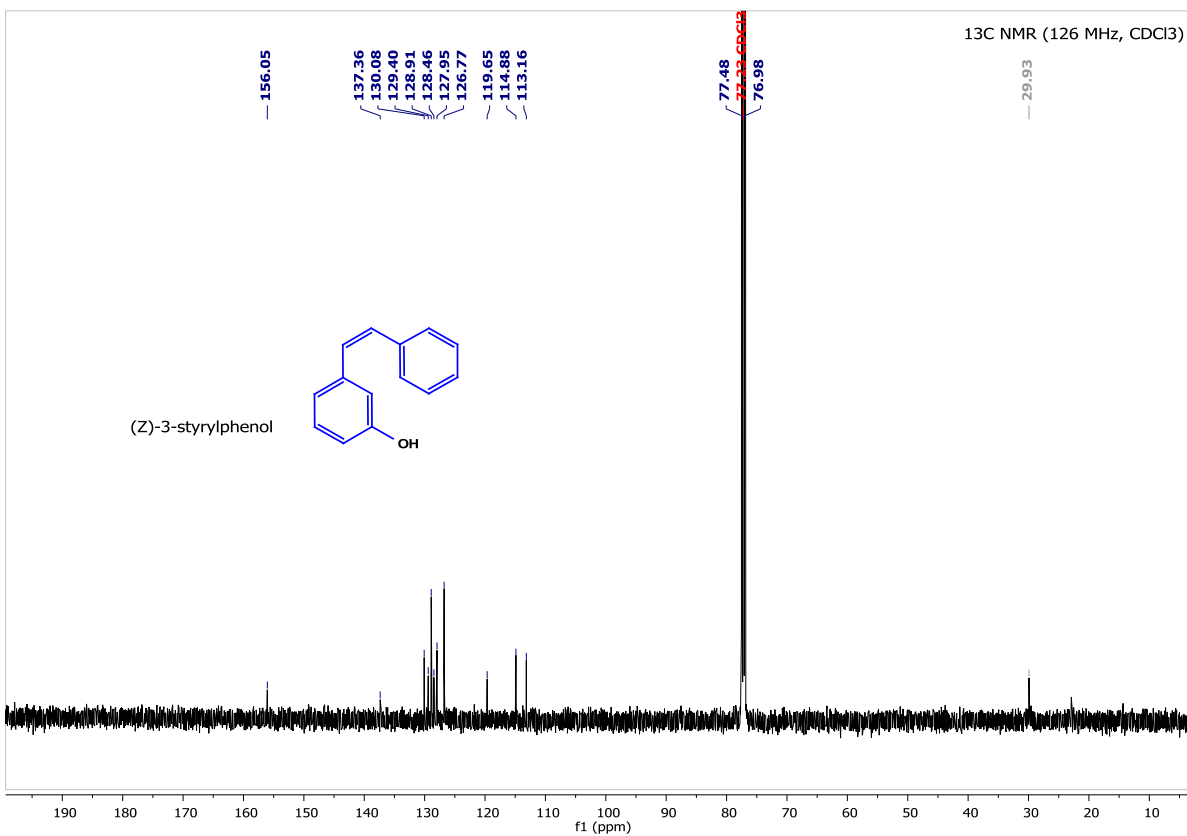

**(E)-ethyl 3-(3-hydroxy-5-styrylphenyl)acrylate:**

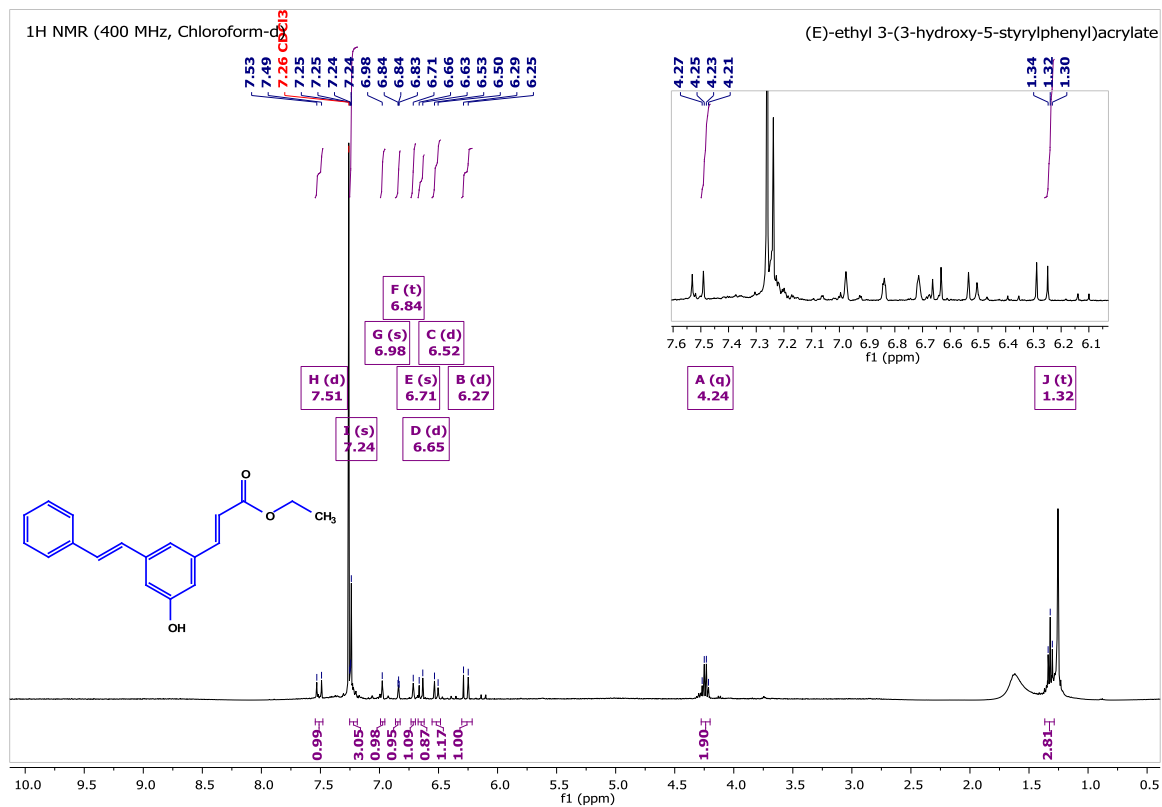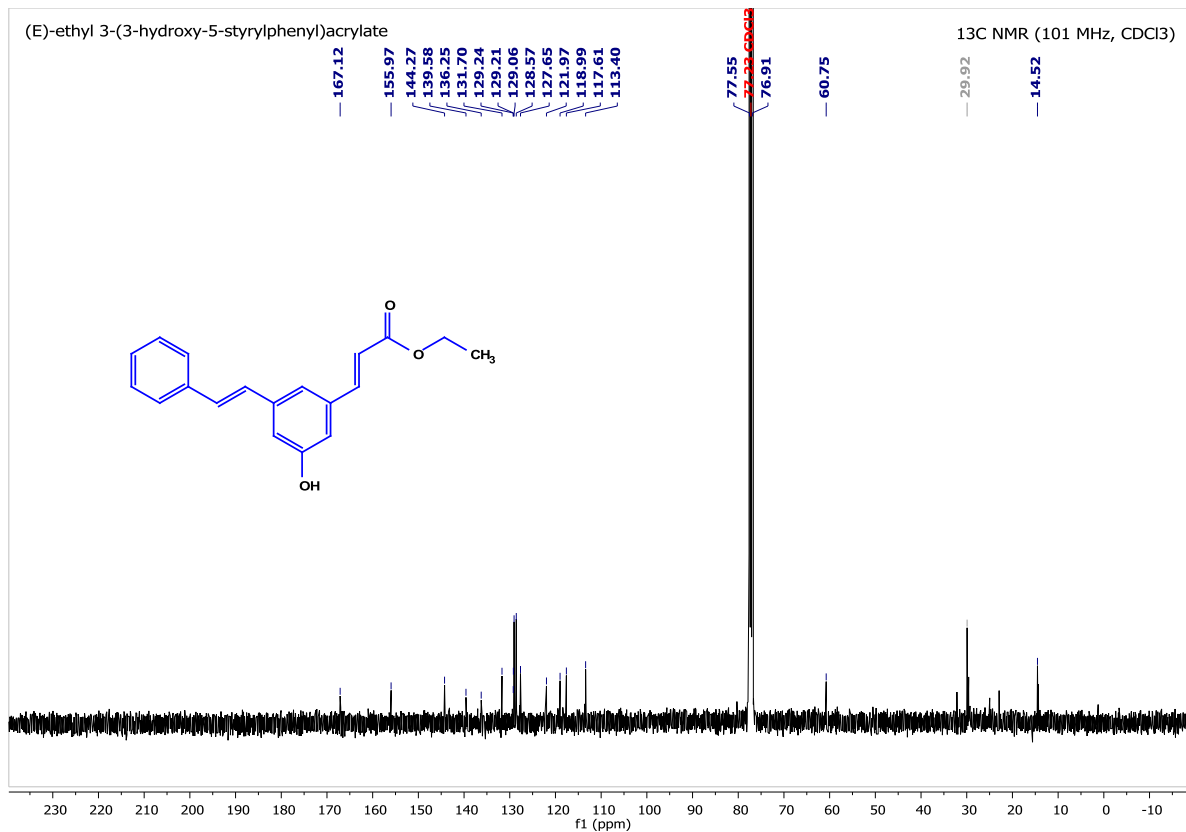

### 3-((2-cyanophenoxy)sulfonyl)methyl)-5-hydroxyphenyl acetate:

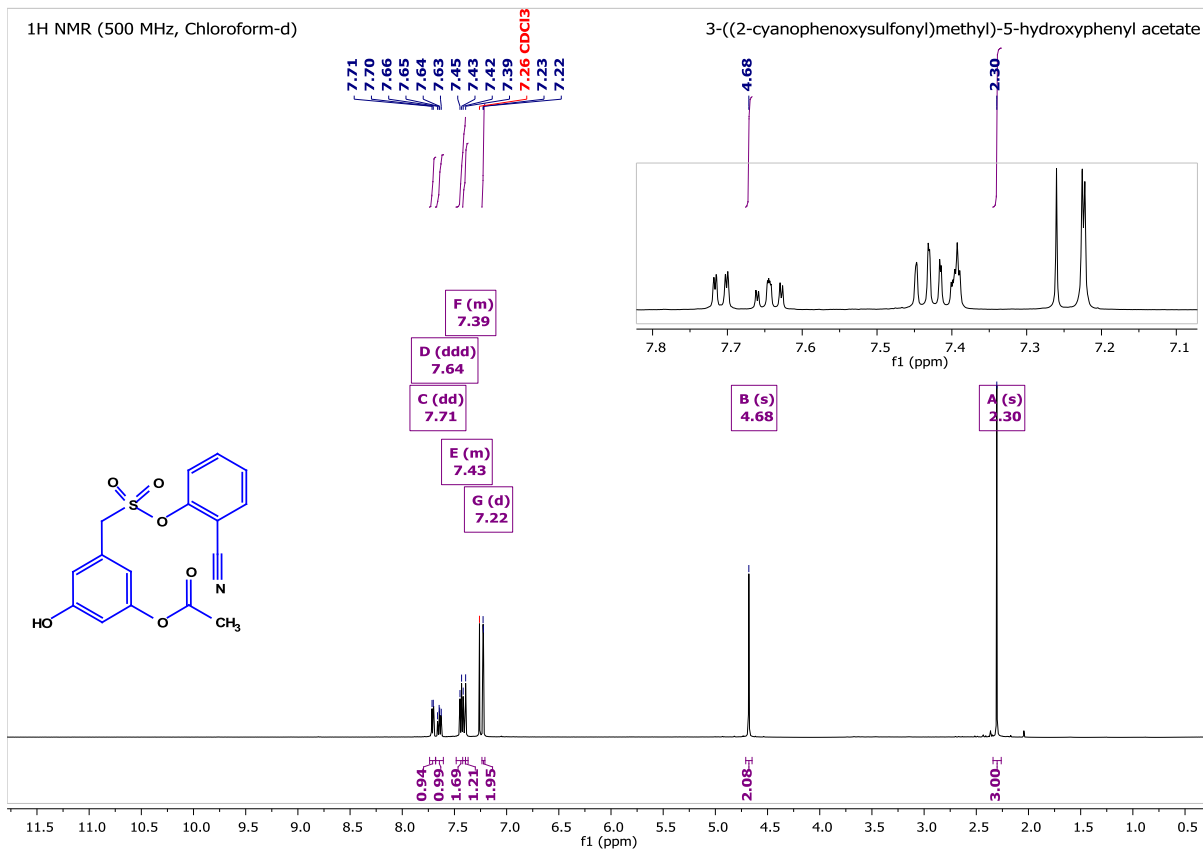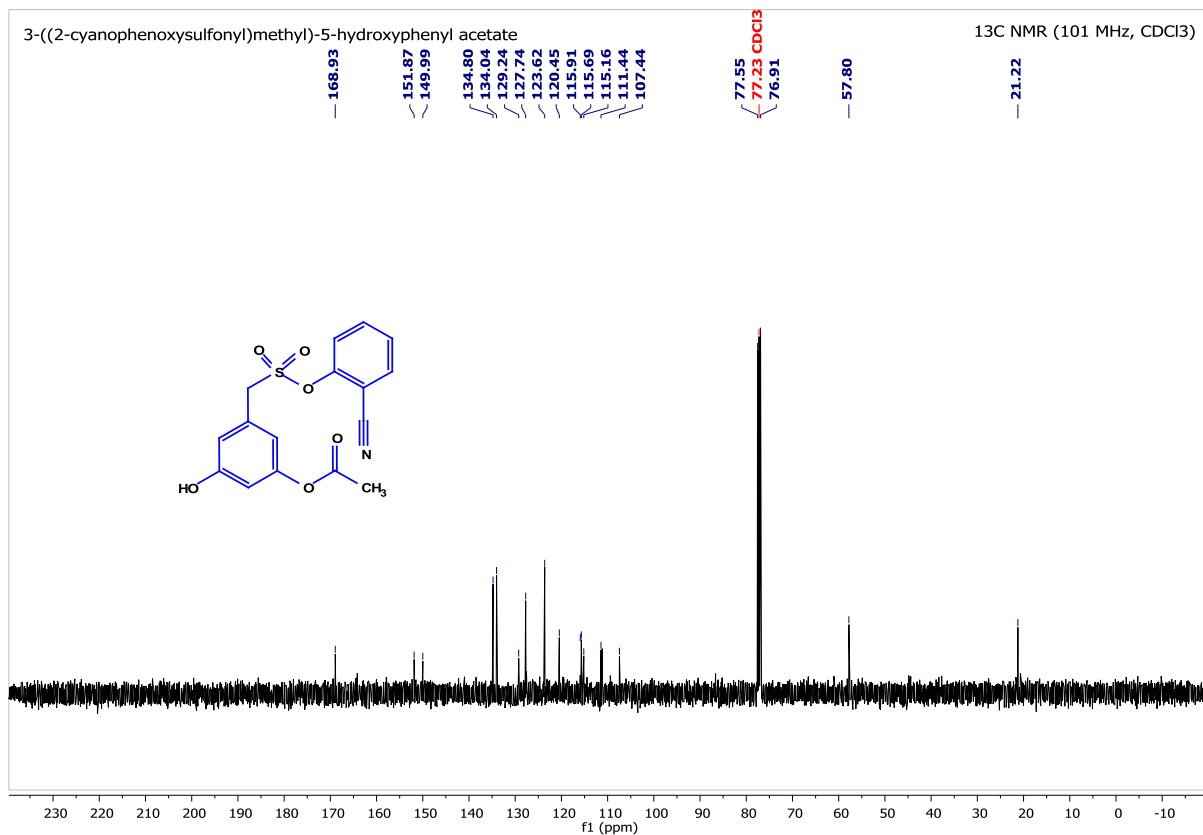

### (E)-3-(4-methoxystyryl)phenol:

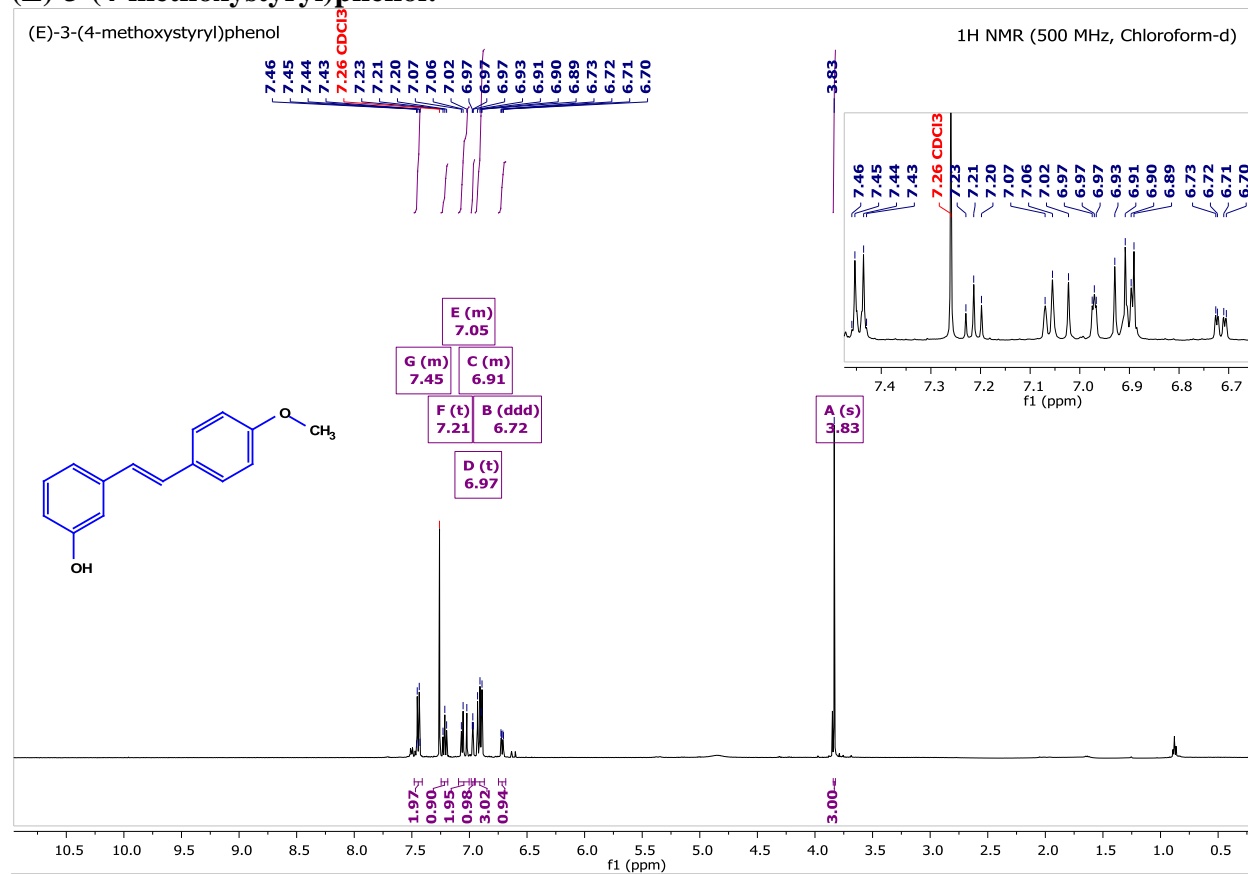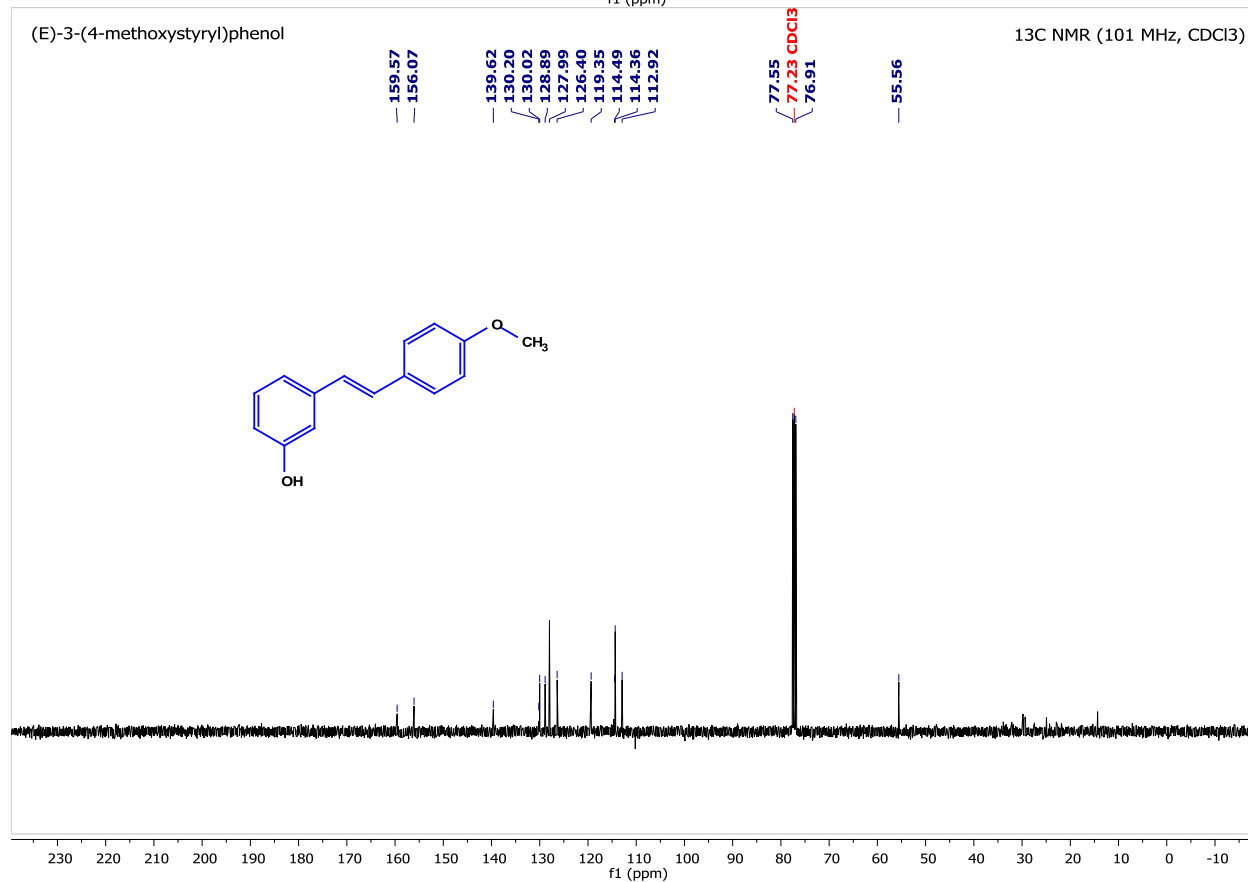

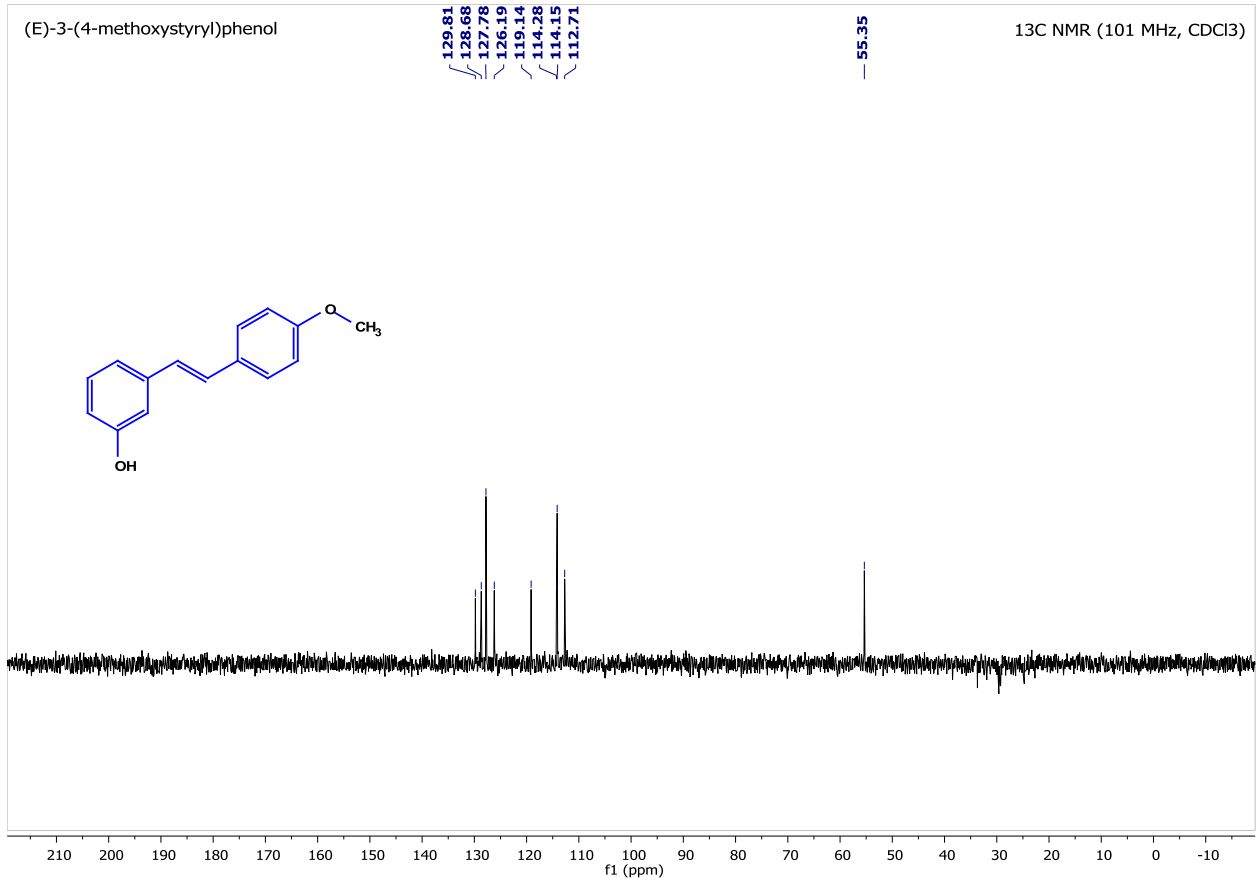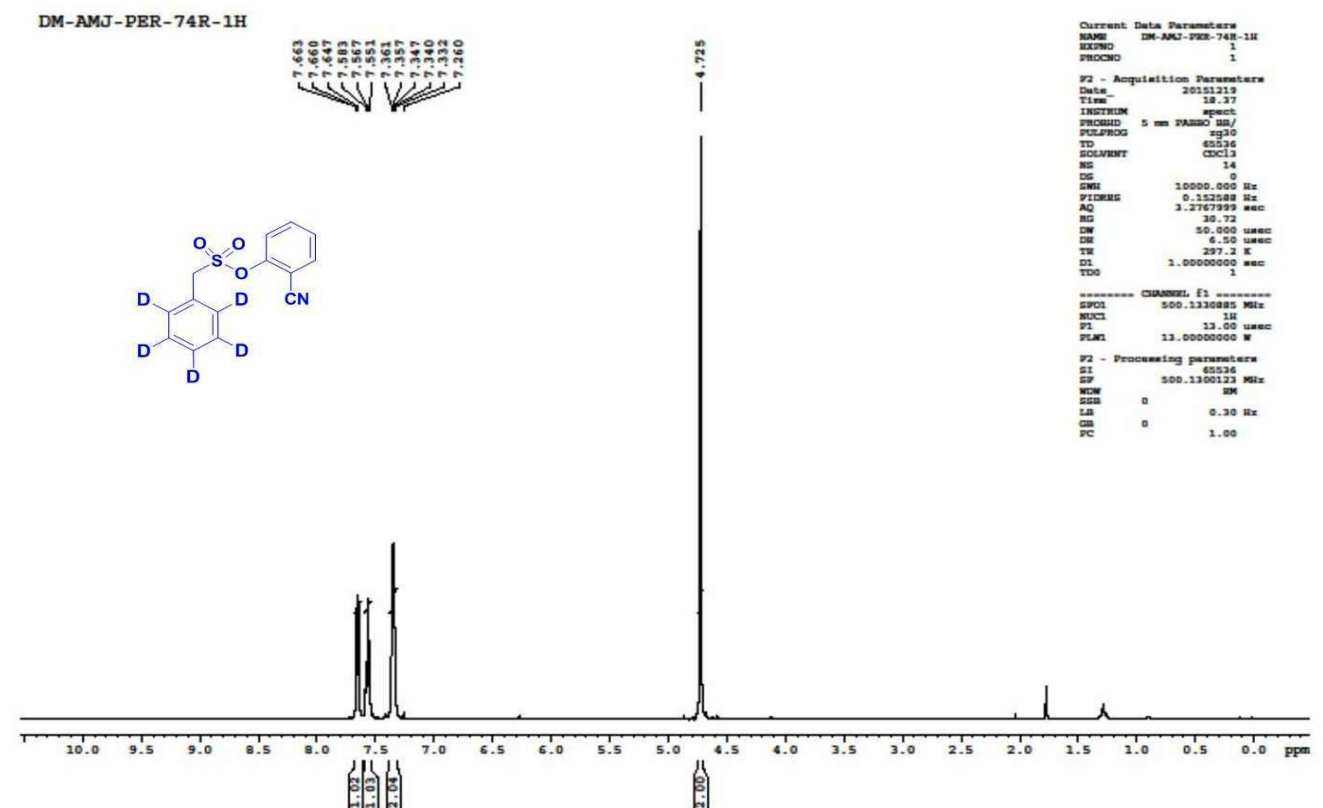

DM-AMJ-PER-74R-13C

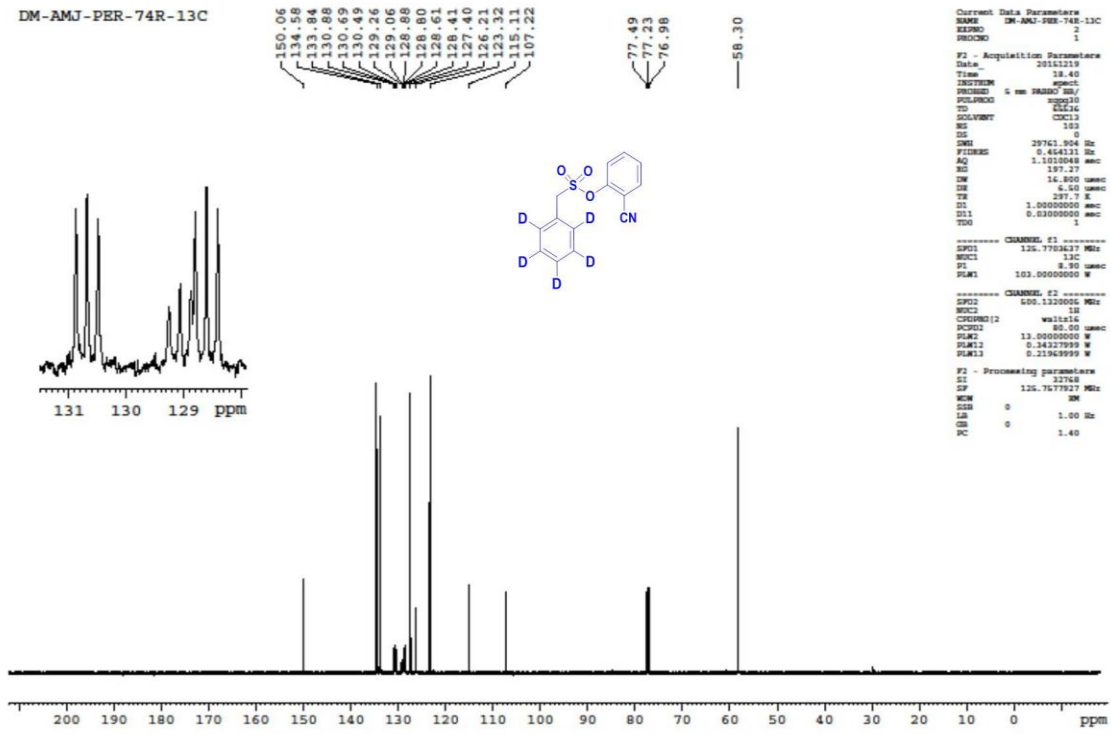

DM-AMJ-PER-77-1-1H

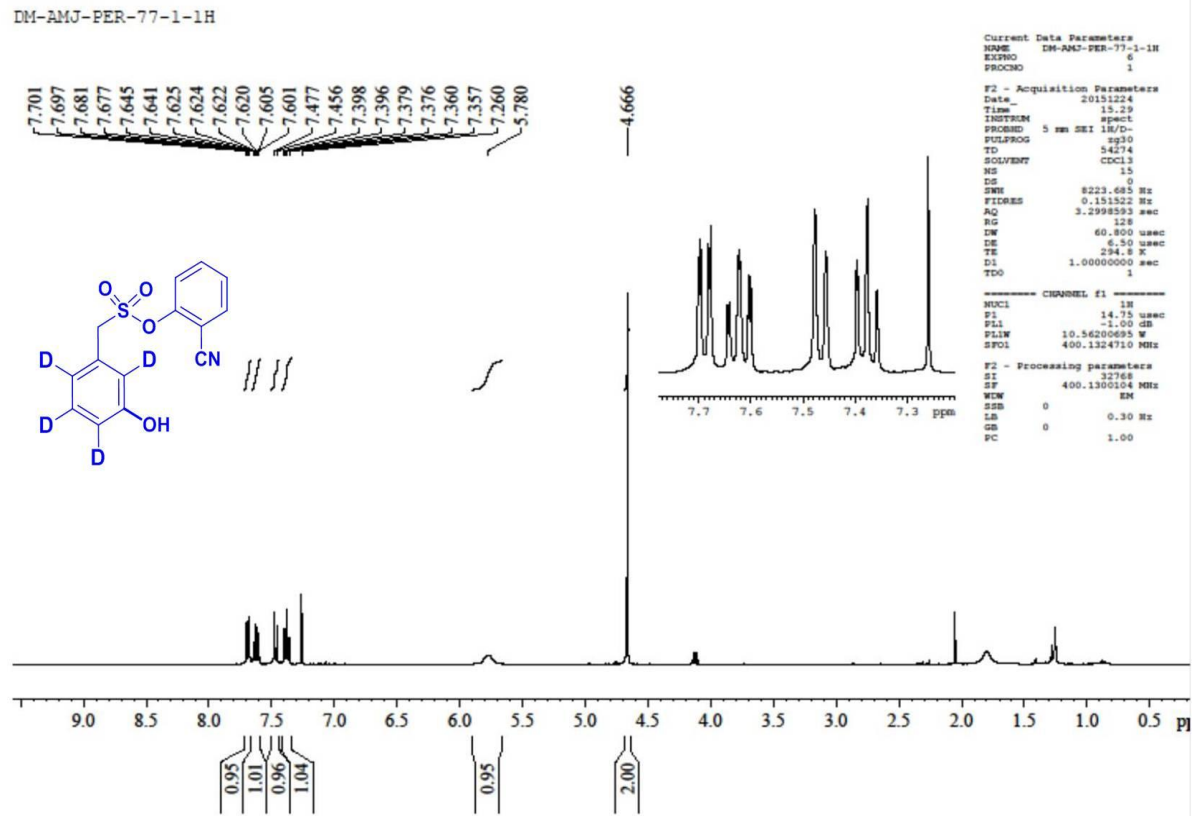

DM-AMJ-PER-77-1-13C\_1

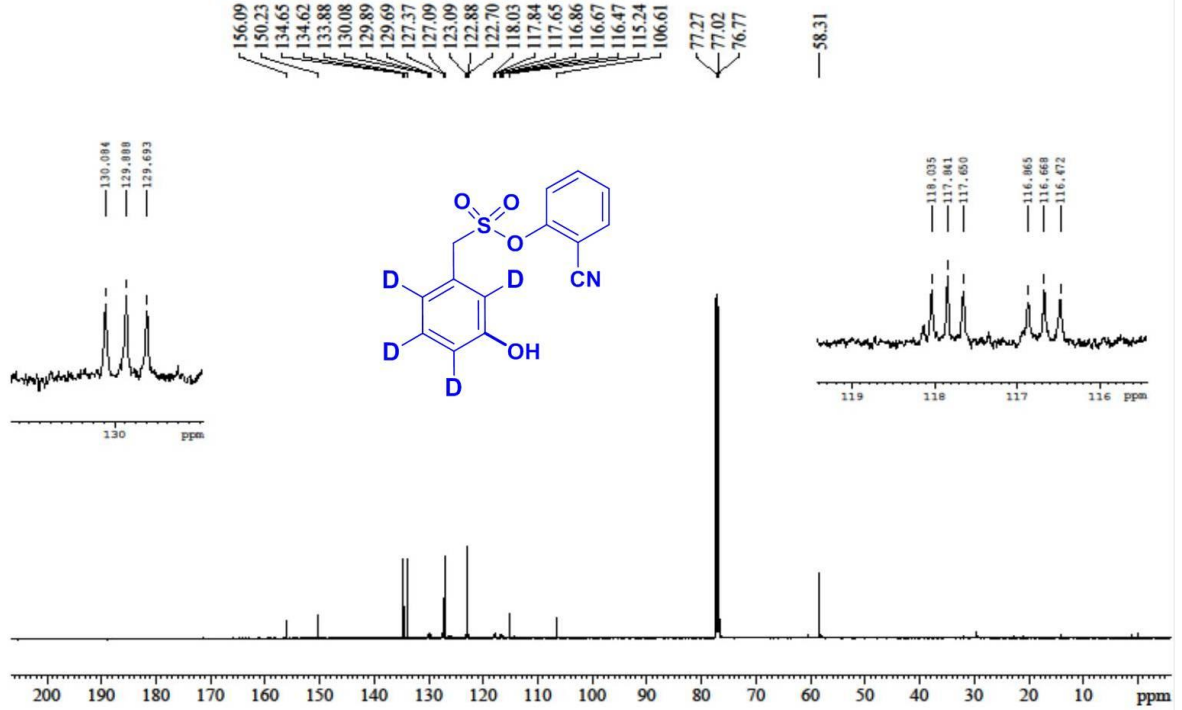



**XIV. Cartesian Coordinates of the Optimized Geometries at the SMD( $\epsilon=16.7$ )/M06/6-31G\*\*,LANL2DZ(Pd) Level of Theory**

**(II) Hydroxylation product using N-Formyl-Glycine**

**Substrate (1)**

Number of imaginary frequencies : 0

Electronic energy : =-1218.0961336  
Zero-point correction= 0.223003  
Thermal correction to Energy= 0.239094  
Thermal correction to Enthalpy= 0.240038  
Thermal correction to Gibbs Free Energy= 0.177894  
Sum of electronic and zero-point Energies= -1217.873131  
Sum of electronic and thermal Energies= -1217.857040  
Sum of electronic and thermal Enthalpies= -1217.856096  
Sum of electronic and thermal Free Energies= -1217.918239

**Cartesian Coordinates**

|    |           |           |           |
|----|-----------|-----------|-----------|
| 6  | 2.396255  | 1.417286  | -0.021171 |
| 6  | 2.451714  | 0.110423  | 0.467194  |
| 6  | 3.432837  | -0.764415 | -0.003253 |
| 6  | 4.353050  | -0.332483 | -0.952043 |
| 6  | 4.297847  | 0.973077  | -1.433310 |
| 6  | 3.320789  | 1.848538  | -0.965825 |
| 1  | 1.625145  | 2.093096  | 0.349187  |
| 1  | 3.473968  | -1.783539 | 0.378757  |
| 1  | 5.116733  | -1.016601 | -1.315131 |
| 1  | 5.020685  | 1.311137  | -2.172648 |
| 1  | 3.278111  | 2.869487  | -1.338337 |
| 6  | 1.447974  | -0.349507 | 1.475556  |
| 1  | 0.965368  | 0.477796  | 2.010786  |
| 1  | 1.866003  | -1.048230 | 2.212183  |
| 16 | 0.094168  | -1.267793 | 0.747080  |
| 8  | 0.573031  | -2.415669 | -0.005123 |
| 8  | -0.975330 | -1.443078 | 1.716868  |
| 8  | -0.399617 | -0.137516 | -0.351666 |
| 6  | -1.764793 | -0.025466 | -0.568497 |
| 6  | -2.397775 | -0.839762 | -1.488950 |
| 6  | -2.465579 | 0.961124  | 0.135583  |
| 6  | -3.759421 | -0.657456 | -1.717774 |
| 1  | -1.824030 | -1.596584 | -2.018290 |
| 6  | -3.830923 | 1.137867  | -0.106419 |
| 6  | -4.470467 | 0.325939  | -1.033940 |

|   |           |           |           |
|---|-----------|-----------|-----------|
| 1 | -4.267382 | -1.290732 | -2.440354 |
| 1 | -4.373952 | 1.906825  | 0.436054  |
| 1 | -5.531639 | 0.460796  | -1.223908 |
| 6 | -1.754562 | 1.746570  | 1.090198  |
| 7 | -1.140290 | 2.365846  | 1.860528  |

-----  
 ---  
 [Pd(OAc)<sub>2</sub>]<sub>3</sub>  
 -----  
 ---

Total Energy (SMD/M06/6-31G\*\*) = -1750.60789606  
 -----  
 ---

Number of imaginary frequencies : 0

Electronic energy : =-1750.5747527  
 Zero-point correction= 0.315721  
 Thermal correction to Energy= 0.349705  
 Thermal correction to Enthalpy= 0.350649  
 Thermal correction to Gibbs Free Energy= 0.246602  
 Sum of electronic and zero-point Energies= -1750.259032  
 Sum of electronic and thermal Energies= -1750.225048  
 Sum of electronic and thermal Enthalpies= -1750.224104  
 Sum of electronic and thermal Free Energies= -1750.328150

-----  
 Cartesian Coordinates  
 -----

|    |           |           |           |
|----|-----------|-----------|-----------|
| 46 | 1.559037  | 0.928514  | -0.001488 |
| 8  | 2.288923  | 0.035247  | -1.687034 |
| 8  | 2.647809  | -0.307202 | 1.230488  |
| 6  | 2.237849  | -1.316722 | 1.863936  |
| 8  | 1.167662  | -1.961746 | 1.678836  |
| 46 | 0.023733  | -1.809013 | -0.005073 |
| 6  | 2.293810  | -1.213956 | -1.872974 |
| 8  | 1.643990  | -2.088612 | -1.240602 |
| 8  | 1.121000  | 1.989958  | 1.685653  |
| 8  | 0.987212  | 2.468094  | -1.238768 |
| 6  | -0.097355 | 2.595324  | -1.866543 |
| 8  | -1.177725 | 1.970204  | -1.674795 |
| 46 | -1.584818 | 0.884530  | 0.004864  |
| 6  | 0.023813  | 2.584005  | 1.881424  |
| 8  | -1.056834 | 2.431774  | 1.252415  |
| 8  | -2.292781 | -0.036952 | 1.684456  |
| 8  | -2.637838 | -0.371229 | -1.237573 |
| 6  | -2.258257 | -1.285446 | 1.868666  |
| 6  | -2.201320 | -1.367910 | -1.873886 |

|   |           |           |           |
|---|-----------|-----------|-----------|
| 8 | -1.586272 | -2.139520 | 1.230445  |
| 8 | -1.115966 | -1.986972 | -1.689102 |
| 6 | 3.211147  | -1.714141 | -2.954887 |
| 1 | 4.199552  | -1.887537 | -2.516001 |
| 1 | 2.841563  | -2.655565 | -3.365126 |
| 1 | 3.317396  | -0.959703 | -3.737086 |
| 6 | -0.122286 | 3.635851  | -2.952546 |
| 1 | -0.414387 | 4.592792  | -2.507050 |
| 1 | 0.869108  | 3.748845  | -3.395060 |
| 1 | -0.863046 | 3.373594  | -3.710443 |
| 6 | 0.023207  | 3.615209  | 2.976519  |
| 1 | -0.981076 | 3.739542  | 3.385116  |
| 1 | 0.731778  | 3.332597  | 3.757816  |
| 1 | 0.350769  | 4.570525  | 2.552863  |
| 6 | -3.146918 | -1.821609 | 2.957425  |
| 1 | -2.653970 | -2.649810 | 3.470838  |
| 1 | -3.413998 | -1.029045 | 3.658558  |
| 1 | -4.064063 | -2.205104 | 2.497903  |
| 6 | -3.092000 | -1.901618 | -2.962005 |
| 1 | -3.830496 | -2.570373 | -2.507229 |
| 1 | -3.626655 | -1.083012 | -3.447853 |
| 1 | -2.508404 | -2.473334 | -3.685744 |
| 6 | 3.143996  | -1.833103 | 2.947659  |
| 1 | 3.668480  | -1.005122 | 3.428560  |
| 1 | 2.574299  | -2.412786 | 3.676207  |
| 1 | 3.889791  | -2.491572 | 2.489745  |

-----  
---  
N-For-Gly  
-----  
---

Number of imaginary frequencies : 0

Electronic energy : =-397.5717136  
Zero-point correction= 0.088821  
Thermal correction to Energy= 0.096178  
Thermal correction to Enthalpy= 0.097122  
Thermal correction to Gibbs Free Energy= 0.056113  
Sum of electronic and zero-point Energies= -397.482893  
Sum of electronic and thermal Energies= -397.475536  
Sum of electronic and thermal Enthalpies= -397.474592  
Sum of electronic and thermal Free Energies= -397.515600

.....  
Cartesian Coordinates  
.....

|   |          |           |          |
|---|----------|-----------|----------|
| 7 | 0.075654 | -0.233294 | 0.062559 |
|---|----------|-----------|----------|

|   |           |           |           |
|---|-----------|-----------|-----------|
| 1 | -0.268678 | -1.186697 | 0.073135  |
| 6 | -0.884286 | 0.830975  | 0.041663  |
| 1 | -0.816441 | 1.481019  | 0.929056  |
| 6 | -2.271753 | 0.288369  | -0.015970 |
| 8 | -2.529084 | -0.896892 | -0.041900 |
| 1 | -0.748153 | 1.498169  | -0.824122 |
| 1 | -3.067250 | 1.060300  | -0.031344 |
| 6 | 1.397887  | 0.014512  | 0.000651  |
| 8 | 1.899428  | 1.128317  | -0.047066 |
| 8 | 2.113465  | -1.125022 | 0.001051  |
| 1 | 3.049386  | -0.874096 | -0.039383 |

-----  
 ---  
 AcOH  
 -----  
 ---

Number of imaginary frequencies : 0

Electronic energy :       =-228.973358  
 Zero-point correction=           0.061755  
 Thermal correction to Energy=       0.066344  
 Thermal correction to Enthalpy=     0.067289  
 Thermal correction to Gibbs Free Energy=   0.034174  
 Sum of electronic and zero-point Energies=   -228.911603  
 Sum of electronic and thermal Energies=   -228.907014  
 Sum of electronic and thermal Enthalpies=   -228.906069  
 Sum of electronic and thermal Free Energies=   -228.939184

.....  
 Cartesian Coordinates  
 .....

|   |           |           |           |
|---|-----------|-----------|-----------|
| 6 | -0.089900 | 0.118233  | -0.000056 |
| 8 | -0.644338 | 1.198143  | -0.000018 |
| 8 | -0.767747 | -1.038308 | 0.000092  |
| 1 | -1.716940 | -0.826283 | 0.000194  |
| 6 | 1.383562  | -0.105757 | -0.000061 |
| 1 | 1.671047  | -0.688063 | 0.881716  |
| 1 | 1.670927  | -0.689146 | -0.881153 |
| 1 | 1.909673  | 0.849956  | -0.000651 |

-----  
 ---  
 HFIP (solvent)  
 -----  
 ---

Number of imaginary frequencies : 0

Electronic energy : =-789.5311222  
Zero-point correction= 0.063551  
Thermal correction to Energy= 0.072449  
Thermal correction to Enthalpy= 0.073393  
Thermal correction to Gibbs Free Energy= 0.028814  
Sum of electronic and zero-point Energies= -789.467571  
Sum of electronic and thermal Energies= -789.458673  
Sum of electronic and thermal Enthalpies= -789.457729  
Sum of electronic and thermal Free Energies= -789.502308

.....  
Cartesian Coordinates  
.....

|   |           |           |           |
|---|-----------|-----------|-----------|
| 6 | 1.274823  | -0.144021 | -0.040740 |
| 6 | 0.000971  | 0.547974  | -0.501249 |
| 6 | -1.270207 | -0.152131 | -0.035530 |
| 1 | 0.001152  | 0.519453  | -1.599841 |
| 9 | 2.330200  | 0.459895  | -0.586831 |
| 9 | 1.296848  | -1.426409 | -0.407387 |
| 9 | 1.418597  | -0.090763 | 1.283074  |
| 9 | -1.401520 | -1.366127 | -0.570712 |
| 9 | -1.310636 | -0.278914 | 1.291263  |
| 9 | -2.328133 | 0.574043  | -0.406507 |
| 8 | 0.039308  | 1.835320  | 0.027876  |
| 1 | -0.397338 | 2.441536  | -0.584135 |

-----  
---  
N-H activation  
-----  
---

[a]  
-----  
---

Number of imaginary frequencies : 0

Electronic energy : =-981.1028259  
Zero-point correction= 0.195257  
Thermal correction to Energy= 0.213552  
Thermal correction to Enthalpy= 0.214496  
Thermal correction to Gibbs Free Energy= 0.147534  
Sum of electronic and zero-point Energies= -980.907569  
Sum of electronic and thermal Energies= -980.889274  
Sum of electronic and thermal Enthalpies= -980.888330  
Sum of electronic and thermal Free Energies= -980.955292

.....  
Cartesian Coordinates

```

-----
46   -0.084926 -0.112912  0.091553
 8    2.721618 -0.656196 -1.215826
 6    3.182274 -2.844779 -0.402000
 6    2.330156 -1.611767 -0.532152
 8    1.218713 -1.665523  0.129301
 6    0.607233  2.569216 -0.706279
 6   -0.875228  2.582928 -0.384417
 8   -1.366837  1.466512  0.094026
 8   -1.549239  3.575969 -0.589515
 1    1.064706  3.511191 -0.385711
 1    0.711212  2.503441 -1.793927
 1    4.063289 -2.594249  0.199828
 1    2.650548 -3.671996  0.072566
 1    3.536690 -3.145517 -1.392710
 7    1.316111  1.413939 -0.116411
 1    2.003136  0.921456 -0.724795
 6    1.816542  1.582686  1.204052
 8    2.735750  0.935408  1.635045
 6   -2.787039 -1.441570  0.105535
 6   -3.716349 -2.596767  0.139992
 1   -4.428591 -2.523729 -0.687103
 1   -3.164532 -3.536018  0.091150
 1   -4.290846 -2.557185  1.072294
 8   -1.561390 -1.604464  0.237527
 8   -3.365880 -0.286215 -0.057062
 1   -2.721967  0.472776 -0.039476
 1    1.262741  2.352614  1.774963

```

```

-----
---
                [a-b] ‡
-----
---
```

Number of imaginary frequencies : 1  
The smallest frequency is : -1173.4268 cm(-1)

```

Electronic energy :      =-981.0962686
Zero-point correction=          0.190264
Thermal correction to Energy=    0.208116
Thermal correction to Enthalpy=   0.209060
Thermal correction to Gibbs Free Energy=  0.143255
Sum of electronic and zero-point Energies= -980.906005
Sum of electronic and thermal Energies= -980.888152
Sum of electronic and thermal Enthalpies= -980.887208
Sum of electronic and thermal Free Energies= -980.953014
-----
```

Cartesian Coordinates

```
-----  
46  -0.102869 -0.131229  0.117887  
8   2.770138 -0.599517 -0.974746  
6   3.075585 -2.922382 -0.638580  
6   2.277922 -1.664398 -0.508156  
8   1.142490 -1.759421  0.062809  
6   0.806489  2.398993 -0.786908  
6  -0.669506  2.575611 -0.476604  
8  -1.256307  1.538778  0.079480  
8  -1.263195  3.603788 -0.748303  
1   1.342322  3.331359 -0.573047  
1   0.899526  2.209314 -1.862442  
1   4.058146 -2.774231 -0.179258  
1   2.570141 -3.770830 -0.174705  
1   3.240711 -3.126555 -1.701986  
7   1.398570  1.267608 -0.058749  
1   2.100099  0.468175 -0.608590  
6   1.907493  1.565044  1.216492  
8   2.473642  0.751358  1.910421  
6  -2.887861 -1.272496  0.095717  
6  -3.899356 -2.356633  0.138530  
1  -4.629266 -2.219481 -0.664282  
1  -3.419591 -3.332788  0.059833  
1  -4.440058 -2.291571  1.089654  
8  -1.677180 -1.524422  0.220628  
8  -3.380726 -0.076573 -0.063283  
1  -2.682237  0.632517 -0.052851  
1   1.766687  2.622983  1.517121
```

```
-----  
---  
[b]  
-----  
---
```

Number of imaginary frequencies : 0

```
Electronic energy :      =-981.1041413  
Zero-point correction=      0.195010  
Thermal correction to Energy=    0.213352  
Thermal correction to Enthalpy=   0.214296  
Thermal correction to Gibbs Free Energy=  0.146695  
Sum of electronic and zero-point Energies= -980.909131  
Sum of electronic and thermal Energies= -980.890789  
Sum of electronic and thermal Enthalpies= -980.889845  
Sum of electronic and thermal Free Energies= -980.957446
```

Cartesian Coordinates

```
-----  
46  -0.096343 -0.082998  0.081721  
8   2.886624 -0.522076 -1.054558  
6   3.310534 -2.766406 -0.503078  
6   2.405518 -1.593073 -0.484995  
8   1.285616 -1.652493  0.048217  
6   0.538354  2.608746 -0.618993  
6  -0.960677  2.575980 -0.402266  
8  -1.429817  1.434134  0.053867  
8  -1.682190  3.525459 -0.653263  
1   0.936780  3.555870 -0.230850  
1   0.705132  2.610589 -1.705175  
1   4.139356 -2.574150  0.187919  
1   2.778630 -3.666290 -0.193095  
1   3.737750 -2.893181 -1.502029  
7   1.191097  1.461910  0.001301  
1   2.277267  0.254171 -0.925170  
6   2.012171  1.669197  1.060675  
8   2.431812  0.802996  1.819752  
6  -2.771411 -1.522406  0.105022  
6  -3.670849 -2.701204  0.158321  
1  -4.377900 -2.663910 -0.676079  
1  -3.094200 -3.626290  0.129412  
1  -4.255807 -2.659488  1.083700  
8  -1.538701 -1.647668  0.165173  
8  -3.391554 -0.378272  0.000562  
1  -2.766159  0.396096 -0.014579  
1   2.337084  2.729478  1.151554
```

```
-----  
---  
Different Possibilities of Potential Active Catalyst at the SMD/M06/6-31G**  
-----  
---
```

Pd(OAc)<sub>2</sub> with Ligand combinations: Active Catalyst

```
-----  
---  
[2a]  
-----  
---
```

Number of imaginary frequencies : 0

Electronic energy : =-981.0986384  
Zero-point correction= 0.194720  
Thermal correction to Energy= 0.213389  
Thermal correction to Enthalpy= 0.214333

S120



|                                              |             |
|----------------------------------------------|-------------|
| Thermal correction to Gibbs Free Energy=     | 0.145292    |
| Sum of electronic and zero-point Energies=   | -980.903918 |
| Sum of electronic and thermal Energies=      | -980.885249 |
| Sum of electronic and thermal Enthalpies=    | -980.884305 |
| Sum of electronic and thermal Free Energies= | -980.953346 |

.....  
 Cartesian Coordinates  
 .....

|    |           |           |           |
|----|-----------|-----------|-----------|
| 46 | 1.021675  | -0.226759 | -0.254224 |
| 1  | -0.052794 | 1.846547  | 1.281234  |
| 6  | 0.975905  | 2.759744  | -0.093310 |
| 8  | 0.382563  | 2.731923  | 1.057807  |
| 6  | 1.408536  | 4.106449  | -0.543227 |
| 1  | 1.886183  | 4.051590  | -1.521772 |
| 1  | 0.540426  | 4.772352  | -0.579829 |
| 1  | 2.108039  | 4.520025  | 0.191208  |
| 8  | 1.197432  | 1.762957  | -0.807800 |
| 6  | -3.150322 | -0.061015 | 0.601253  |
| 6  | -1.662723 | 0.186041  | 0.624319  |
| 8  | -1.014110 | -0.196653 | -0.411714 |
| 8  | -1.179878 | 0.743894  | 1.623805  |
| 1  | -3.645382 | 0.920161  | 0.622171  |
| 1  | -3.417428 | -0.559164 | 1.542936  |
| 7  | -3.578734 | -0.834250 | -0.538587 |
| 1  | -2.877580 | -1.156621 | -1.194904 |
| 6  | -4.871941 | -1.142528 | -0.723739 |
| 8  | -5.778761 | -0.797082 | 0.027224  |
| 6  | 2.622075  | -2.018039 | 0.173255  |
| 8  | 3.012276  | -0.824517 | -0.051360 |
| 6  | 3.568849  | -3.129593 | 0.389986  |
| 1  | 3.159182  | -3.838526 | 1.114771  |
| 1  | 3.711441  | -3.658706 | -0.559624 |
| 1  | 4.535535  | -2.748081 | 0.727570  |
| 8  | 1.356319  | -2.212949 | 0.175080  |
| 1  | -5.042524 | -1.745862 | -1.634879 |

-----  
 ---  
**[2b]**  
 -----  
 ---

Number of imaginary frequencies : 0

|                                 |               |
|---------------------------------|---------------|
| Electronic energy :             | =-752.1084531 |
| Zero-point correction=          | 0.131742      |
| Thermal correction to Energy=   | 0.144562      |
| Thermal correction to Enthalpy= | 0.145506      |

Thermal correction to Gibbs Free Energy= 0.090919  
 Sum of electronic and zero-point Energies= -751.976711  
 Sum of electronic and thermal Energies= -751.963891  
 Sum of electronic and thermal Enthalpies= -751.962947  
 Sum of electronic and thermal Free Energies= -752.017534

.....  
 Cartesian Coordinates  
 .....

|    |           |           |           |
|----|-----------|-----------|-----------|
| 46 | -0.170506 | -0.299151 | 0.000005  |
| 6  | 2.620945  | 0.588724  | 0.000061  |
| 6  | 2.605734  | -0.924301 | -0.000025 |
| 8  | 1.437563  | -1.504843 | 0.000014  |
| 8  | 3.655799  | -1.551328 | -0.000070 |
| 1  | 3.170266  | 0.929804  | -0.885896 |
| 7  | 1.259581  | 1.116360  | 0.000035  |
| 6  | 1.037512  | 2.377954  | 0.000021  |
| 8  | -0.145751 | 2.937105  | -0.000017 |
| 8  | -1.996605 | 0.697286  | -0.000113 |
| 6  | -2.634325 | -0.418923 | -0.000043 |
| 8  | -1.944126 | -1.481847 | 0.000037  |
| 6  | -4.113923 | -0.427332 | 0.000041  |
| 1  | -4.495083 | -1.450334 | -0.000500 |
| 1  | -4.479419 | 0.108385  | -0.882495 |
| 1  | -4.479329 | 0.107409  | 0.883211  |
| 1  | -0.872704 | 2.277810  | -0.000120 |
| 1  | 3.170148  | 0.929664  | 0.886148  |
| 1  | 1.861635  | 3.095970  | 0.000039  |

-----  
 ---  
 [2]  
 -----  
 ---

Number of imaginary frequencies : 0

Electronic energy : =-1541.6718995  
 Zero-point correction= 0.197400  
 Thermal correction to Energy= 0.220111  
 Thermal correction to Enthalpy= 0.221055  
 Thermal correction to Gibbs Free Energy= 0.141693  
 Sum of electronic and zero-point Energies= -1541.474500  
 Sum of electronic and thermal Energies= -1541.451788  
 Sum of electronic and thermal Enthalpies= -1541.450844  
 Sum of electronic and thermal Free Energies= -1541.530206

.....  
 Cartesian Coordinates  
 .....

|    |           |           |           |
|----|-----------|-----------|-----------|
| 46 | -0.995059 | -0.016680 | -0.271430 |
| 6  | -2.912384 | -2.212945 | -0.108610 |
| 6  | -3.677629 | -0.929948 | 0.130404  |
| 8  | -2.977450 | 0.175576  | 0.094089  |
| 8  | -4.879502 | -0.948756 | 0.335252  |
| 1  | -3.340569 | -2.689960 | -0.999415 |
| 1  | -3.091880 | -2.882465 | 0.741456  |
| 7  | -1.482708 | -1.971653 | -0.292642 |
| 6  | -0.675392 | -2.969844 | -0.397897 |
| 8  | 0.603925  | -2.878269 | -0.584105 |
| 8  | 0.966790  | -0.356937 | -0.723472 |
| 1  | 0.886976  | -1.901330 | -0.658798 |
| 6  | 1.920438  | 0.292524  | 0.027882  |
| 6  | 3.195899  | 0.323119  | -0.810882 |
| 6  | 2.135714  | -0.381926 | 1.381894  |
| 1  | 1.665993  | 1.344470  | 0.245123  |
| 9  | 3.550909  | -0.896747 | -1.222131 |
| 9  | 2.996142  | 1.070661  | -1.897843 |
| 9  | 4.228630  | 0.844427  | -0.143882 |
| 9  | 2.668412  | -1.602209 | 1.259586  |
| 9  | 2.935371  | 0.335505  | 2.172799  |
| 9  | 0.965667  | -0.522876 | 2.015739  |
| 8  | -0.561069 | 2.044468  | -0.177859 |
| 6  | -1.365193 | 2.970015  | 0.027841  |
| 8  | -2.642988 | 2.807203  | 0.223702  |
| 6  | -0.910127 | 4.380250  | 0.083493  |
| 1  | -1.534348 | 4.995812  | -0.571272 |
| 1  | -1.043584 | 4.752315  | 1.105478  |
| 1  | 0.139006  | 4.458994  | -0.202476 |
| 1  | -2.920446 | 1.850988  | 0.203088  |
| 1  | -1.061242 | -3.992575 | -0.332911 |

-----  
 ---  
 [2d]  
 -----  
 ---

Number of imaginary frequencies : 0

Electronic energy :       =-2102.2214456  
 Zero-point correction=           0.200088  
 Thermal correction to Energy=       0.226948  
 Thermal correction to Enthalpy=     0.227892  
 Thermal correction to Gibbs Free Energy=   0.141990  
 Sum of electronic and zero-point Energies=   -2102.021357  
 Sum of electronic and thermal Energies=   -2101.994497  
 Sum of electronic and thermal Enthalpies=   -2101.993553

S123

Sum of electronic and thermal Free Energies= -2102.079455

-----  
Cartesian Coordinates  
-----

|    |           |           |           |
|----|-----------|-----------|-----------|
| 46 | -0.935606 | -0.902121 | -0.070506 |
| 6  | -3.475510 | -2.286519 | 0.050038  |
| 6  | -2.467378 | -3.226708 | -0.576629 |
| 8  | -1.254369 | -2.771846 | -0.736188 |
| 8  | -2.807239 | -4.346366 | -0.931977 |
| 1  | -3.999227 | -2.807385 | 0.860298  |
| 1  | -4.216180 | -2.039506 | -0.721912 |
| 7  | -2.830824 | -1.068898 | 0.539923  |
| 6  | -3.470265 | -0.251036 | 1.301210  |
| 8  | -2.995253 | 0.857805  | 1.777191  |
| 8  | -0.655911 | 0.971500  | 0.707062  |
| 1  | -2.055223 | 1.026326  | 1.433328  |
| 6  | -0.285782 | 1.951381  | -0.188464 |
| 6  | 0.533732  | 2.981253  | 0.586312  |
| 6  | -1.492635 | 2.574184  | -0.890200 |
| 1  | 0.370733  | 1.581548  | -0.996098 |
| 9  | -0.134557 | 3.458927  | 1.636778  |
| 9  | 1.649886  | 2.407012  | 1.052415  |
| 9  | 0.900080  | 4.014250  | -0.173175 |
| 9  | -2.284141 | 3.238749  | -0.043197 |
| 9  | -1.127969 | 3.418918  | -1.856318 |
| 9  | -2.231794 | 1.614377  | -1.456983 |
| 8  | 1.113083  | -0.869733 | -0.809603 |
| 1  | 1.303738  | -1.574178 | -1.454380 |
| 6  | 2.168616  | -0.672955 | 0.099979  |
| 6  | 3.290345  | 0.103492  | -0.585589 |
| 6  | 2.603673  | -2.004219 | 0.701646  |
| 1  | 1.786888  | -0.041839 | 0.911717  |
| 9  | 3.895077  | -0.621989 | -1.525803 |
| 9  | 4.201789  | 0.489896  | 0.300552  |
| 9  | 2.791064  | 1.191550  | -1.170012 |
| 9  | 3.623528  | -1.848663 | 1.536985  |
| 9  | 2.966705  | -2.866786 | -0.250724 |
| 9  | 1.587166  | -2.544129 | 1.370892  |
| 1  | -4.499836 | -0.478245 | 1.596475  |

-----  
---  
[2e]  
-----  
---

Number of imaginary frequencies : 0

Electronic energy : =-981.1113991  
Zero-point correction= 0.194760  
Thermal correction to Energy= 0.212935  
Thermal correction to Enthalpy= 0.213880  
Thermal correction to Gibbs Free Energy= 0.146560  
Sum of electronic and zero-point Energies= -980.916639  
Sum of electronic and thermal Energies= -980.898464  
Sum of electronic and thermal Enthalpies= -980.897520  
Sum of electronic and thermal Free Energies= -980.964839

.....  
Cartesian Coordinates  
.....

|    |           |           |           |
|----|-----------|-----------|-----------|
| 46 | 0.032222  | -0.008984 | 0.117108  |
| 6  | 0.524090  | -2.739825 | 0.684130  |
| 6  | 1.815065  | -2.218544 | 0.077689  |
| 8  | 1.748226  | -0.996694 | -0.396387 |
| 8  | 2.833243  | -2.887835 | 0.063479  |
| 1  | 0.626902  | -2.667619 | 1.775422  |
| 1  | 0.387576  | -3.796366 | 0.425374  |
| 7  | -0.594301 | -1.917988 | 0.236621  |
| 6  | -1.632460 | -2.469377 | -0.288909 |
| 8  | -2.623509 | -1.865421 | -0.860748 |
| 8  | -1.604461 | 0.963729  | 0.865043  |
| 8  | 0.853689  | 1.925645  | -0.032491 |
| 6  | 2.056374  | 2.208230  | -0.162369 |
| 8  | 3.010785  | 1.330782  | -0.297963 |
| 6  | 2.513060  | 3.619701  | -0.188469 |
| 1  | 3.317243  | 3.758827  | 0.540740  |
| 1  | 2.928759  | 3.838603  | -1.178204 |
| 1  | 1.685825  | 4.297358  | 0.023936  |
| 1  | 2.669004  | 0.394192  | -0.318406 |
| 6  | -2.575568 | 1.234649  | 0.072186  |
| 8  | -2.750315 | 0.701909  | -1.042762 |
| 6  | -3.543302 | 2.272487  | 0.561536  |
| 1  | -3.457727 | 3.157600  | -0.078744 |
| 1  | -4.564767 | 1.893180  | 0.459707  |
| 1  | -3.348987 | 2.559983  | 1.596647  |
| 1  | -2.523588 | -0.857633 | -0.945303 |
| 1  | -1.727166 | -3.559806 | -0.264601 |

-----  
---  
[2f]  
-----  
---

Number of imaginary frequencies : 0

Electronic energy : =-2891.7619663  
Zero-point correction= 0.266797  
Thermal correction to Energy= 0.303754  
Thermal correction to Enthalpy= 0.304698  
Thermal correction to Gibbs Free Energy= 0.194955  
Sum of electronic and zero-point Energies= -2891.495169  
Sum of electronic and thermal Energies= -2891.458212  
Sum of electronic and thermal Enthalpies= -2891.457268  
Sum of electronic and thermal Free Energies= -2891.567011

.....  
Cartesian Coordinates  
.....

|    |           |           |           |
|----|-----------|-----------|-----------|
| 46 | 0.115622  | 0.199811  | -0.115836 |
| 8  | -0.831714 | -1.707142 | -0.488215 |
| 6  | 2.457851  | 3.891617  | -0.222037 |
| 6  | 1.342468  | 2.890838  | -0.343055 |
| 8  | 1.400483  | 1.800660  | 0.250209  |
| 8  | 0.370114  | 3.276932  | -1.101342 |
| 1  | 2.041846  | 4.802617  | 0.219729  |
| 1  | 2.765172  | 4.148537  | -1.244243 |
| 7  | 3.575049  | 3.435612  | 0.553757  |
| 1  | 3.697550  | 3.777532  | 1.498136  |
| 6  | 4.424851  | 2.502669  | 0.077973  |
| 8  | 4.322097  | 1.981920  | -1.026488 |
| 8  | -1.367831 | 1.424184  | -0.820005 |
| 1  | -0.399533 | 2.600330  | -1.086651 |
| 6  | -2.482363 | 1.607521  | -0.032342 |
| 6  | -3.698286 | 1.654610  | -0.952671 |
| 6  | -2.341657 | 2.861097  | 0.827768  |
| 1  | -2.670730 | 0.781411  | 0.675153  |
| 9  | -3.795798 | 0.496544  | -1.615662 |
| 9  | -4.838084 | 1.828428  | -0.280884 |
| 9  | -3.599818 | 2.629785  | -1.856447 |
| 9  | -1.265772 | 2.741233  | 1.615059  |
| 9  | -2.168435 | 3.954524  | 0.078802  |
| 9  | -3.395172 | 3.066775  | 1.617728  |
| 8  | 1.529677  | -1.067059 | 0.476937  |
| 6  | 2.736466  | -0.910612 | -0.165702 |
| 6  | 2.909381  | -2.015779 | -1.199065 |
| 6  | 3.835980  | -0.891371 | 0.889400  |
| 1  | 2.840778  | 0.043369  | -0.714883 |
| 9  | 5.055804  | -0.785001 | 0.356720  |
| 9  | 3.653798  | 0.161378  | 1.694542  |
| 9  | 3.816784  | -1.987286 | 1.650203  |
| 9  | 4.046372  | -1.904752 | -1.888638 |
| 9  | 2.885684  | -3.229453 | -0.640837 |
| 9  | 1.899163  | -1.961446 | -2.076530 |

|   |           |           |           |
|---|-----------|-----------|-----------|
| 1 | -0.079617 | -2.260920 | -0.183645 |
| 6 | -2.051896 | -2.110167 | 0.082773  |
| 6 | -1.936209 | -2.166687 | 1.604604  |
| 6 | -2.475848 | -3.431445 | -0.557667 |
| 1 | -2.810681 | -1.365683 | -0.181623 |
| 9 | -1.726547 | -0.939604 | 2.090809  |
| 9 | -0.904486 | -2.925677 | 1.975407  |
| 9 | -3.040418 | -2.646968 | 2.160877  |
| 9 | -3.702088 | -3.776814 | -0.181248 |
| 9 | -2.465826 | -3.302795 | -1.880020 |
| 9 | -1.641667 | -4.419608 | -0.231174 |
| 1 | 5.242794  | 2.269166  | 0.783151  |

-----  
**[2g]**  
 -----  
 ---

Number of imaginary frequencies : 0

Electronic energy : =-1933.5908963  
 Zero-point correction= 0.170651  
 Thermal correction to Energy= 0.195676  
 Thermal correction to Enthalpy= 0.196621  
 Thermal correction to Gibbs Free Energy= 0.114235  
 Sum of electronic and zero-point Energies= -1933.420246  
 Sum of electronic and thermal Energies= -1933.395220  
 Sum of electronic and thermal Enthalpies= -1933.394276  
 Sum of electronic and thermal Free Energies= -1933.476662

.....  
 Cartesian Coordinates  
 .....

|    |           |           |           |
|----|-----------|-----------|-----------|
| 46 | -1.023505 | 1.082158  | 0.062691  |
| 6  | -2.856480 | 2.705114  | 0.001378  |
| 8  | -1.780741 | 2.961123  | 0.636160  |
| 8  | -2.924016 | 1.568443  | -0.583487 |
| 8  | -0.726316 | -0.691370 | -0.799165 |
| 6  | -0.704241 | -1.763916 | 0.056971  |
| 6  | 0.087576  | -2.878687 | -0.626467 |
| 6  | -2.125780 | -2.194522 | 0.414750  |
| 1  | -0.183989 | -1.578841 | 1.016647  |
| 9  | -0.486830 | -3.273226 | -1.762870 |
| 9  | 1.316718  | -2.440685 | -0.926964 |
| 9  | 0.231794  | -3.949239 | 0.155584  |
| 9  | -2.867135 | -2.415307 | -0.670846 |
| 9  | -2.159240 | -3.297788 | 1.166274  |
| 9  | -2.721788 | -1.219594 | 1.114883  |
| 8  | 0.959411  | 0.820748  | 0.879176  |
| 1  | 1.212169  | 1.511576  | 1.516939  |

|   |           |           |           |
|---|-----------|-----------|-----------|
| 6 | 2.008794  | 0.500782  | -0.005665 |
| 6 | 3.046864  | -0.350982 | 0.722128  |
| 6 | 2.576815  | 1.772698  | -0.625335 |
| 1 | 1.576578  | -0.114057 | -0.805117 |
| 9 | 3.736621  | 0.363477  | 1.613476  |
| 9 | 3.905200  | -0.885114 | -0.140747 |
| 9 | 2.441364  | -1.340562 | 1.373020  |
| 9 | 3.643544  | 1.515346  | -1.372496 |
| 9 | 2.926093  | 2.651232  | 0.319269  |
| 9 | 1.654409  | 2.352936  | -1.390404 |
| 6 | -3.970245 | 3.674171  | -0.063487 |
| 1 | -4.245597 | 3.981250  | 0.950575  |
| 1 | -3.637724 | 4.568697  | -0.601390 |
| 1 | -4.833482 | 3.239319  | -0.572168 |

---

[2c]

---

---  
 ---  
 Number of imaginary frequencies : 0

Electronic energy : =-1541.6495692  
 Zero-point correction= 0.196817  
 Thermal correction to Energy= 0.220032  
 Thermal correction to Enthalpy= 0.220976  
 Thermal correction to Gibbs Free Energy= 0.141307  
 Sum of electronic and zero-point Energies= -1541.452752  
 Sum of electronic and thermal Energies= -1541.429537  
 Sum of electronic and thermal Enthalpies= -1541.428593  
 Sum of electronic and thermal Free Energies= -1541.508263

.....  
 Cartesian Coordinates  
 .....

|    |           |           |           |
|----|-----------|-----------|-----------|
| 46 | -0.888975 | 0.055335  | -0.200831 |
| 8  | -3.147658 | -1.687187 | 1.102223  |
| 6  | -2.639697 | -3.833554 | 0.194861  |
| 6  | -2.407364 | -2.358836 | 0.373718  |
| 8  | -1.411480 | -1.899072 | -0.318520 |
| 6  | -2.522356 | 2.177782  | 0.812746  |
| 6  | -1.201016 | 2.798794  | 0.398621  |
| 8  | -0.314418 | 1.985371  | -0.108714 |
| 8  | -0.989452 | 3.987719  | 0.578016  |
| 1  | -3.348863 | 2.865965  | 0.609159  |
| 1  | -2.488494 | 2.004122  | 1.893075  |
| 1  | -3.379976 | -3.970972 | -0.602236 |
| 1  | -1.726709 | -4.360685 | -0.091877 |
| 1  | -3.051734 | -4.258170 | 1.114209  |
| 7  | -2.757834 | 0.868661  | 0.159584  |
| 1  | -3.170433 | 0.116342  | 0.746886  |



|   |           |           |           |
|---|-----------|-----------|-----------|
| 6 | -3.359611 | 0.908156  | -1.131233 |
| 8 | -4.025394 | 0.003187  | -1.562667 |
| 8 | 1.118628  | -0.624986 | -0.601974 |
| 1 | -3.138225 | 1.846116  | -1.675862 |
| 1 | 1.232457  | -1.583656 | -0.472073 |
| 6 | 2.216306  | 0.120202  | -0.129299 |
| 1 | 1.924362  | 1.177618  | -0.140314 |
| 6 | 3.383697  | -0.056465 | -1.096061 |
| 6 | 2.531288  | -0.266891 | 1.310959  |
| 9 | 2.989362  | 0.253459  | -2.327468 |
| 9 | 4.401063  | 0.733455  | -0.770558 |
| 9 | 3.819004  | -1.317694 | -1.108442 |
| 9 | 3.591958  | 0.386462  | 1.769825  |
| 9 | 2.764178  | -1.577831 | 1.416028  |
| 9 | 1.489549  | 0.020138  | 2.090327  |

-----  
 ---  
 Pd(OAc)<sub>2</sub> -Ligand with Substrate at the SMD/M06/6-31G\*\*  
 -----  
 ---

[3a]  
 -----  
 ---

Number of imaginary frequencies : 0

Electronic energy : =-1970.2242881  
 Zero-point correction= 0.356704  
 Thermal correction to Energy= 0.386928  
 Thermal correction to Enthalpy= 0.387872  
 Thermal correction to Gibbs Free Energy= 0.294140  
 Sum of electronic and zero-point Energies= -1969.867584  
 Sum of electronic and thermal Energies= -1969.837360  
 Sum of electronic and thermal Enthalpies= -1969.836416  
 Sum of electronic and thermal Free Energies= -1969.930148

-----  
 Cartesian Coordinates  
 -----

|    |           |           |           |
|----|-----------|-----------|-----------|
| 46 | 2.778703  | -0.248177 | 0.035529  |
| 6  | -1.832351 | -0.465429 | 1.153114  |
| 1  | -0.800076 | -0.529394 | 0.780549  |
| 1  | -1.864942 | -0.887486 | 2.166627  |
| 8  | -1.047876 | 1.877402  | 2.183677  |
| 6  | -1.497014 | 3.043227  | -0.390476 |
| 6  | -0.126808 | 3.251147  | -0.603021 |
| 6  | -2.394693 | 4.091335  | -0.453722 |
| 6  | 0.345540  | 4.534238  | -0.900052 |
| 6  | -1.914289 | 5.365978  | -0.746303 |

|    |           |           |           |
|----|-----------|-----------|-----------|
| 1  | -3.451283 | 3.898946  | -0.285643 |
| 6  | -0.556906 | 5.585913  | -0.971536 |
| 1  | 1.407786  | 4.689396  | -1.066480 |
| 1  | -2.613063 | 6.196444  | -0.802172 |
| 1  | -0.199161 | 6.584901  | -1.203287 |
| 6  | 0.750227  | 2.143015  | -0.472344 |
| 7  | 1.443227  | 1.224607  | -0.337430 |
| 6  | 5.197604  | -0.419490 | 0.304376  |
| 8  | 4.634624  | 0.703387  | 0.073320  |
| 6  | 6.663245  | -0.547095 | 0.421384  |
| 1  | 7.082024  | -0.705587 | -0.579596 |
| 1  | 7.091780  | 0.371919  | 0.829826  |
| 1  | 6.922985  | -1.406184 | 1.045070  |
| 8  | 4.424992  | -1.435421 | 0.401073  |
| 6  | 0.035371  | -3.397165 | -0.705611 |
| 6  | 0.949371  | -2.200204 | -0.883384 |
| 8  | 1.279051  | -1.607394 | 0.222077  |
| 8  | 1.337340  | -1.900516 | -2.008610 |
| 1  | 0.634749  | -4.284151 | -0.960829 |
| 7  | -0.546517 | -3.503044 | 0.610102  |
| 1  | -0.035960 | -3.113204 | 1.393372  |
| 6  | -1.771439 | -4.022392 | 0.814004  |
| 8  | -2.482741 | -4.506517 | -0.058803 |
| 8  | -1.931159 | 1.750312  | -0.166758 |
| 16 | -2.125854 | 1.281304  | 1.410287  |
| 8  | -3.503567 | 1.554272  | 1.782467  |
| 6  | -2.835617 | -1.086362 | 0.235154  |
| 6  | -4.053557 | -1.543777 | 0.742490  |
| 6  | -2.559848 | -1.213978 | -1.127410 |
| 6  | -4.983073 | -2.136173 | -0.104378 |
| 1  | -4.264679 | -1.439419 | 1.806409  |
| 6  | -3.486858 | -1.816541 | -1.970761 |
| 1  | -1.608318 | -0.851855 | -1.519971 |
| 6  | -4.698080 | -2.277180 | -1.459929 |
| 1  | -5.927966 | -2.496877 | 0.295559  |
| 1  | -3.262789 | -1.926992 | -3.029371 |
| 1  | -5.421107 | -2.749414 | -2.121266 |
| 1  | -2.078188 | -3.969725 | 1.877259  |
| 1  | -0.765693 | -3.335586 | -1.450753 |

-----  
---  
**[3b]**  
-----  
---

Number of imaginary frequencies : 0

Electronic energy :       =-1970.2240197  
 Zero-point correction=           0.356735  
 Thermal correction to Energy=       0.386859  
 Thermal correction to Enthalpy=     0.387804  
 Thermal correction to Gibbs Free Energy=   0.293759  
 Sum of electronic and zero-point Energies=   -1969.867285  
 Sum of electronic and thermal Energies=   -1969.837160  
 Sum of electronic and thermal Enthalpies=   -1969.836216  
 Sum of electronic and thermal Free Energies=   -1969.930260

.....  
 Cartesian Coordinates  
 .....

|    |           |           |           |
|----|-----------|-----------|-----------|
| 46 | 3.009792  | -0.063199 | 0.499193  |
| 6  | -3.468026 | -0.530266 | -0.689733 |
| 1  | -3.866705 | 0.391448  | -1.131514 |
| 1  | -3.442735 | -1.312803 | -1.459571 |
| 8  | -1.111773 | 0.220704  | -1.664121 |
| 6  | -1.687706 | 2.399036  | 0.033828  |
| 6  | -0.403775 | 2.919774  | -0.193584 |
| 6  | -2.812064 | 3.162035  | -0.218294 |
| 6  | -0.252645 | 4.221100  | -0.682579 |
| 6  | -2.652174 | 4.457354  | -0.705301 |
| 1  | -3.796392 | 2.743054  | -0.024609 |
| 6  | -1.383538 | 4.984160  | -0.936034 |
| 1  | 0.744655  | 4.614747  | -0.856473 |
| 1  | -3.533157 | 5.061038  | -0.906717 |
| 1  | -1.275033 | 5.995717  | -1.316413 |
| 6  | 0.711589  | 2.082495  | 0.067193  |
| 7  | 1.583701  | 1.354284  | 0.289377  |
| 6  | 5.086806  | -0.420319 | 1.737398  |
| 8  | 4.419500  | 0.658140  | 1.873444  |
| 6  | 6.369096  | -0.637543 | 2.436881  |
| 1  | 7.183479  | -0.290085 | 1.790150  |
| 1  | 6.396528  | -0.062649 | 3.366089  |
| 1  | 6.519395  | -1.701902 | 2.635430  |
| 8  | 4.603902  | -1.296884 | 0.938769  |
| 6  | 1.211003  | -1.855042 | -2.916343 |
| 6  | 1.945627  | -0.889625 | -1.997068 |
| 8  | 1.942076  | -1.242648 | -0.751874 |
| 8  | 2.527586  | 0.076012  | -2.482756 |
| 1  | 1.980569  | -2.491224 | -3.375851 |
| 7  | 0.190838  | -2.650187 | -2.280715 |
| 1  | 0.419260  | -3.125764 | -1.412527 |
| 6  | -1.106948 | -2.577976 | -2.617489 |
| 8  | -2.022349 | -3.135296 | -2.016277 |
| 8  | -1.806240 | 1.136869  | 0.584778  |
| 16 | -1.728214 | -0.190849 | -0.411654 |
| 8  | -1.106962 | -1.204573 | 0.415962  |
| 6  | -4.176373 | -0.962911 | 0.551520  |

|   |           |           |           |
|---|-----------|-----------|-----------|
| 6 | -4.078554 | -2.290686 | 0.975282  |
| 6 | -4.919876 | -0.050005 | 1.300544  |
| 6 | -4.726084 | -2.700946 | 2.134203  |
| 1 | -3.491732 | -2.994947 | 0.386515  |
| 6 | -5.570101 | -0.463469 | 2.458424  |
| 1 | -4.995663 | 0.984008  | 0.965480  |
| 6 | -5.472544 | -1.787924 | 2.876271  |
| 1 | -4.651172 | -3.736372 | 2.458430  |
| 1 | -6.154496 | 0.249494  | 3.035567  |
| 1 | -5.981978 | -2.110707 | 3.781643  |
| 1 | -1.280365 | -1.966333 | -3.524800 |
| 1 | 0.756565  | -1.268734 | -3.722002 |

-----  
 ---  
**[3c]**  
 -----  
 ---

Number of imaginary frequencies : 0

Electronic energy : =-1970.2216485  
 Zero-point correction= 0.357030  
 Thermal correction to Energy= 0.387092  
 Thermal correction to Enthalpy= 0.388036  
 Thermal correction to Gibbs Free Energy= 0.294904  
 Sum of electronic and zero-point Energies= -1969.864619  
 Sum of electronic and thermal Energies= -1969.834557  
 Sum of electronic and thermal Enthalpies= -1969.833612  
 Sum of electronic and thermal Free Energies= -1969.926744

.....  
 Cartesian Coordinates  
 .....

|    |           |           |           |
|----|-----------|-----------|-----------|
| 46 | -2.140785 | -0.601879 | 0.332113  |
| 6  | 1.817219  | 0.458177  | -2.300785 |
| 1  | 0.736737  | 0.582566  | -2.445905 |
| 1  | 2.322249  | 0.672130  | -3.252901 |
| 8  | 1.446076  | 2.973701  | -1.505438 |
| 6  | 2.777278  | 0.636964  | 1.075224  |
| 6  | 2.131572  | -0.386182 | 1.791985  |
| 6  | 4.125306  | 0.884950  | 1.278755  |
| 6  | 2.854025  | -1.197293 | 2.673926  |
| 6  | 4.832647  | 0.065774  | 2.155082  |
| 1  | 4.616432  | 1.700850  | 0.761378  |
| 6  | 4.210890  | -0.973475 | 2.843790  |
| 1  | 2.338157  | -1.989131 | 3.210065  |
| 1  | 5.892127  | 0.255480  | 2.307576  |
| 1  | 4.782817  | -1.599888 | 3.521999  |

|    |           |           |           |
|----|-----------|-----------|-----------|
| 6  | 0.743807  | -0.569099 | 1.576008  |
| 7  | -0.390067 | -0.660977 | 1.356152  |
| 6  | -4.159314 | -1.937523 | -0.143275 |
| 8  | -3.285273 | -2.393299 | 0.659790  |
| 6  | -5.375090 | -2.705337 | -0.498357 |
| 1  | -5.238635 | -3.144244 | -1.493662 |
| 1  | -5.546099 | -3.507972 | 0.222807  |
| 1  | -6.242267 | -2.040153 | -0.543506 |
| 8  | -3.944927 | -0.786370 | -0.663815 |
| 8  | 1.959271  | 1.405127  | 0.264894  |
| 16 | 2.335207  | 1.849947  | -1.283386 |
| 8  | 3.774082  | 2.021718  | -1.386285 |
| 6  | 2.158080  | -0.883874 | -1.737133 |
| 6  | 3.482716  | -1.301341 | -1.580004 |
| 6  | 1.116826  | -1.729673 | -1.351794 |
| 6  | 3.757594  | -2.543050 | -1.017513 |
| 1  | 4.298184  | -0.649845 | -1.891840 |
| 6  | 1.394265  | -2.974125 | -0.794539 |
| 1  | 0.084746  | -1.403703 | -1.492526 |
| 6  | 2.714783  | -3.378651 | -0.620535 |
| 1  | 4.790111  | -2.859706 | -0.888577 |
| 1  | 0.574139  | -3.622832 | -0.492424 |
| 1  | 2.933193  | -4.349220 | -0.180397 |
| 7  | -1.535365 | 1.205071  | -0.303102 |
| 6  | -1.536630 | 1.425419  | -1.619500 |
| 8  | -1.611030 | 0.560153  | -2.499112 |
| 6  | -1.580372 | 2.299899  | 0.625107  |
| 1  | -1.039175 | 2.055999  | 1.548410  |
| 6  | -2.988819 | 2.699932  | 0.988812  |
| 8  | -3.995399 | 2.272274  | 0.467396  |
| 8  | -2.988554 | 3.607613  | 1.967386  |
| 1  | -3.910856 | 3.853757  | 2.157043  |
| 1  | -1.419823 | 2.501292  | -1.880291 |
| 1  | -1.075893 | 3.186919  | 0.208300  |

-----  
 ---  
**[3d]**  
 -----  
 ---

Number of imaginary frequencies : 0

Electronic energy :        =-1970.2355041  
 Zero-point correction=        0.356334  
 Thermal correction to Energy=        0.386103  
 Thermal correction to Enthalpy=        0.387047  
 Thermal correction to Gibbs Free Energy=        0.293628

S133

|                                              |              |
|----------------------------------------------|--------------|
| Sum of electronic and zero-point Energies=   | -1969.879171 |
| Sum of electronic and thermal Energies=      | -1969.849401 |
| Sum of electronic and thermal Enthalpies=    | -1969.848457 |
| Sum of electronic and thermal Free Energies= | -1969.941876 |

.....  
 Cartesian Coordinates  
 .....

|    |           |           |           |
|----|-----------|-----------|-----------|
| 46 | 2.145783  | -0.238008 | -0.149457 |
| 6  | -3.054036 | -0.708135 | -0.897587 |
| 1  | -3.760999 | -0.184114 | -1.550261 |
| 1  | -2.187237 | -1.051410 | -1.481972 |
| 8  | -1.260548 | 0.054603  | 0.939663  |
| 6  | -1.785231 | 2.940123  | -0.576306 |
| 6  | -0.518301 | 3.415903  | -0.202297 |
| 6  | -2.868246 | 3.797383  | -0.645059 |
| 6  | -0.339528 | 4.770031  | 0.100473  |
| 6  | -2.680485 | 5.143032  | -0.340756 |
| 1  | -3.838647 | 3.407412  | -0.939837 |
| 6  | -1.427047 | 5.627251  | 0.028831  |
| 1  | 0.645320  | 5.129291  | 0.384667  |
| 1  | -3.526934 | 5.822472  | -0.395359 |
| 1  | -1.297412 | 6.680512  | 0.260354  |
| 6  | 0.547402  | 2.481705  | -0.151889 |
| 7  | 1.367769  | 1.664890  | -0.125706 |
| 6  | 1.298820  | -2.901262 | -0.519312 |
| 6  | 0.391806  | -2.054859 | -1.394179 |
| 8  | 0.685580  | -0.790891 | -1.466484 |
| 8  | -0.576354 | -2.552437 | -1.962589 |
| 1  | 1.438930  | -3.896174 | -0.958258 |
| 7  | 2.563553  | -2.200681 | -0.328956 |
| 6  | 3.677752  | -2.795390 | -0.572984 |
| 8  | 4.853762  | -2.255860 | -0.575162 |
| 8  | -1.910016 | 1.609850  | -0.942050 |
| 16 | -2.426390 | 0.539537  | 0.215735  |
| 8  | -3.495399 | 1.184741  | 0.961811  |
| 6  | -3.696766 | -1.798288 | -0.095160 |
| 6  | -2.935783 | -2.870594 | 0.375655  |
| 6  | -5.054745 | -1.721163 | 0.222362  |
| 6  | -3.533171 | -3.862090 | 1.146533  |
| 1  | -1.880013 | -2.932007 | 0.115368  |
| 6  | -5.649717 | -2.715154 | 0.990762  |
| 1  | -5.643402 | -0.878694 | -0.138931 |
| 6  | -4.888892 | -3.785656 | 1.454359  |
| 1  | -2.938518 | -4.699515 | 1.504535  |
| 1  | -6.709239 | -2.654372 | 1.228737  |
| 1  | -5.355076 | -4.564122 | 2.054425  |
| 8  | 3.435308  | 0.280593  | 1.362087  |
| 6  | 4.666934  | 0.515413  | 1.094956  |
| 8  | 5.230807  | 0.220596  | 0.021575  |

|   |          |           |           |
|---|----------|-----------|-----------|
| 6 | 5.451313 | 1.183258  | 2.187367  |
| 1 | 6.285908 | 0.535109  | 2.474692  |
| 1 | 5.882291 | 2.111289  | 1.796905  |
| 1 | 4.837406 | 1.404860  | 3.062436  |
| 1 | 4.859552 | -1.254736 | -0.405847 |
| 1 | 0.793779 | -3.022195 | 0.450345  |
| 1 | 3.673644 | -3.865891 | -0.801533 |

-----  
---  
**[3f]**  
-----  
---

Number of imaginary frequencies : 0

Electronic energy : =-1970.2370248  
Zero-point correction= 0.354902  
Thermal correction to Energy= 0.385089  
Thermal correction to Enthalpy= 0.386033  
Thermal correction to Gibbs Free Energy= 0.290839  
Sum of electronic and zero-point Energies= -1969.882122  
Sum of electronic and thermal Energies= -1969.851936  
Sum of electronic and thermal Enthalpies= -1969.850992  
Sum of electronic and thermal Free Energies= -1969.946186

-----  
Cartesian Coordinates  
-----

|    |           |           |           |
|----|-----------|-----------|-----------|
| 46 | 1.866857  | 0.208694  | -0.299654 |
| 6  | -2.998943 | -2.502432 | 1.185379  |
| 1  | -3.613825 | -2.280558 | 2.065858  |
| 1  | -3.254610 | -3.511079 | 0.835333  |
| 8  | -5.086227 | -1.645421 | -0.230225 |
| 6  | -3.611207 | 1.130796  | -0.089989 |
| 6  | -2.504292 | 1.751591  | -0.684649 |
| 6  | -4.881639 | 1.659854  | -0.226493 |
| 6  | -2.682902 | 2.926047  | -1.424744 |
| 6  | -5.047863 | 2.827091  | -0.967661 |
| 1  | -5.720509 | 1.164227  | 0.254123  |
| 6  | -3.957456 | 3.456304  | -1.563321 |
| 1  | -1.821385 | 3.403907  | -1.882902 |
| 1  | -6.043203 | 3.249683  | -1.077262 |
| 1  | -4.100647 | 4.367463  | -2.136945 |
| 6  | -1.207135 | 1.190418  | -0.532932 |
| 7  | -0.139179 | 0.755851  | -0.422394 |
| 6  | 3.843337  | -1.743811 | -0.853626 |
| 6  | 2.684364  | -2.033144 | -1.788603 |
| 8  | 1.726937  | -1.141940 | -1.799204 |

|    |           |           |           |
|----|-----------|-----------|-----------|
| 8  | 2.641423  | -3.050940 | -2.467141 |
| 1  | 4.791181  | -1.959434 | -1.364380 |
| 7  | 3.773529  | -0.364473 | -0.404637 |
| 6  | 4.759052  | 0.473200  | -0.672242 |
| 8  | 4.739179  | 1.716719  | -0.567350 |
| 8  | -3.400954 | -0.004504 | 0.675687  |
| 16 | -3.651872 | -1.445868 | -0.099868 |
| 8  | -2.827695 | -1.446870 | -1.297368 |
| 6  | -1.533930 | -2.323445 | 1.422471  |
| 6  | -1.084042 | -1.488662 | 2.447644  |
| 6  | -0.608344 | -3.004688 | 0.629241  |
| 6  | 0.278729  | -1.345397 | 2.684026  |
| 1  | -1.808475 | -0.960471 | 3.066192  |
| 6  | 0.753406  | -2.869222 | 0.872379  |
| 1  | -0.960412 | -3.655798 | -0.169821 |
| 6  | 1.199027  | -2.036399 | 1.897694  |
| 1  | 0.624091  | -0.699935 | 3.488445  |
| 1  | 1.464132  | -3.424615 | 0.262581  |
| 1  | 2.265731  | -1.934469 | 2.093467  |
| 8  | 1.948170  | 1.429788  | 1.422818  |
| 6  | 2.280122  | 2.630122  | 1.447232  |
| 8  | 3.046814  | 3.189936  | 0.568658  |
| 6  | 1.799309  | 3.523458  | 2.533585  |
| 1  | 2.658887  | 3.912970  | 3.088595  |
| 1  | 1.284371  | 4.381667  | 2.088840  |
| 1  | 1.125546  | 2.991929  | 3.206451  |
| 1  | 3.585134  | 2.502498  | 0.019157  |
| 1  | 5.694632  | -0.019429 | -1.001603 |
| 1  | 3.764731  | -2.438481 | -0.004321 |

-----  
 ---  
**[3g]**  
 -----  
 ---

Number of imaginary frequencies : 0

Electronic energy :        =-2759.7825844  
 Zero-point correction=        0.421751  
 Thermal correction to Energy=        0.461298  
 Thermal correction to Enthalpy=        0.462242  
 Thermal correction to Gibbs Free Energy=        0.349111  
 Sum of electronic and zero-point Energies=        -2759.360834  
 Sum of electronic and thermal Energies=        -2759.321287  
 Sum of electronic and thermal Enthalpies=        -2759.320343

S136



Sum of electronic and thermal Free Energies= -2759.433473

.....  
Cartesian Coordinates  
.....

|    |           |           |           |
|----|-----------|-----------|-----------|
| 46 | 1.829853  | 0.309431  | -1.376262 |
| 6  | -3.568899 | -0.479122 | -1.276276 |
| 1  | -4.504115 | 0.089593  | -1.216785 |
| 1  | -3.202637 | -0.488450 | -2.311425 |
| 8  | -1.052566 | -0.157690 | -0.463099 |
| 6  | -2.275135 | 3.071743  | -0.713340 |
| 6  | -1.022945 | 3.665079  | -0.484792 |
| 6  | -3.443890 | 3.740409  | -0.405882 |
| 6  | -0.955078 | 4.956716  | 0.049230  |
| 6  | -3.364445 | 5.024663  | 0.125753  |
| 1  | -4.398271 | 3.252206  | -0.587740 |
| 6  | -2.129649 | 5.630716  | 0.348330  |
| 1  | 0.016085  | 5.412886  | 0.219255  |
| 1  | -4.280011 | 5.558293  | 0.366774  |
| 1  | -2.082405 | 6.634994  | 0.759183  |
| 6  | 0.142294  | 2.910131  | -0.780607 |
| 7  | 1.046183  | 2.222195  | -1.013082 |
| 6  | 0.912923  | -2.183476 | -2.295156 |
| 6  | 0.086381  | -1.127764 | -3.006180 |
| 8  | 0.528808  | 0.096161  | -2.910411 |
| 8  | -0.933010 | -1.415597 | -3.625660 |
| 1  | 1.077726  | -3.036474 | -2.967502 |
| 7  | 2.167832  | -1.598246 | -1.849419 |
| 6  | 3.319582  | -2.040345 | -2.318962 |
| 8  | 4.434493  | -1.491468 | -2.199443 |
| 8  | -2.332053 | 1.822882  | -1.316625 |
| 16 | -2.356065 | 0.472568  | -0.370703 |
| 8  | -2.835089 | 0.860278  | 0.954888  |
| 6  | -3.639206 | -1.842822 | -0.663342 |
| 6  | -2.815712 | -2.862493 | -1.146264 |
| 6  | -4.457867 | -2.072790 | 0.443769  |
| 6  | -2.815789 | -4.106287 | -0.524938 |
| 1  | -2.182527 | -2.670084 | -2.013450 |
| 6  | -4.456581 | -3.318973 | 1.061488  |
| 1  | -5.097293 | -1.273928 | 0.817393  |
| 6  | -3.632003 | -4.333301 | 0.580925  |
| 1  | -2.175975 | -4.900206 | -0.903991 |
| 1  | -5.097862 | -3.498242 | 1.921322  |
| 1  | -3.628781 | -5.305988 | 1.067965  |
| 8  | 2.981748  | 0.527498  | 0.357228  |
| 6  | 4.221888  | 0.577303  | 0.463235  |
| 8  | 5.057279  | 0.188655  | -0.441996 |
| 6  | 4.846601  | 1.104222  | 1.706647  |
| 1  | 5.368131  | 0.285094  | 2.214115  |
| 1  | 5.598305  | 1.854707  | 1.443308  |

|   |           |           |           |
|---|-----------|-----------|-----------|
| 1 | 4.097234  | 1.531473  | 2.373020  |
| 1 | 4.647304  | -0.382453 | -1.198259 |
| 1 | -1.571032 | 0.559988  | 2.399852  |
| 8 | -0.867692 | 0.350540  | 3.040016  |
| 6 | 0.199571  | -0.229083 | 2.367144  |
| 6 | -0.051905 | -1.716551 | 2.113591  |
| 6 | 1.430064  | -0.004915 | 3.232438  |
| 1 | 0.411764  | 0.232454  | 1.388612  |
| 9 | 0.763401  | -2.180604 | 1.160135  |
| 9 | -1.308860 | -1.914580 | 1.718139  |
| 9 | 0.139090  | -2.458544 | 3.209328  |
| 9 | 2.460606  | -0.746455 | 2.819964  |
| 9 | 1.200955  | -0.300706 | 4.510925  |
| 9 | 1.791155  | 1.279950  | 3.178461  |
| 1 | 0.323200  | -2.547098 | -1.440502 |
| 1 | 3.253196  | -3.011312 | -2.846924 |

-----  
 ---  
**[3]**  
 -----  
 ---

Number of imaginary frequencies : 0

Electronic energy :        =-2530.8013909  
 Zero-point correction=                0.358060  
 Thermal correction to Energy=        0.392475  
 Thermal correction to Enthalpy=       0.393419  
 Thermal correction to Gibbs Free Energy=   0.290078  
 Sum of electronic and zero-point Energies=   -2530.443331  
 Sum of electronic and thermal Energies=   -2530.408916  
 Sum of electronic and thermal Enthalpies=   -2530.407972  
 Sum of electronic and thermal Free Energies=   -2530.511313

.....  
 Cartesian Coordinates  
 .....

|    |           |           |           |
|----|-----------|-----------|-----------|
| 46 | -1.137793 | 0.787899  | -0.657357 |
| 6  | 3.633404  | 1.618929  | 2.028336  |
| 1  | 4.033087  | 1.010204  | 2.847903  |
| 1  | 4.143653  | 2.590852  | 2.046608  |
| 8  | 5.725703  | 0.769517  | 0.621036  |
| 6  | 3.797414  | -1.551946 | -0.241869 |
| 6  | 2.711365  | -1.741303 | -1.107724 |
| 6  | 4.965201  | -2.275656 | -0.398911 |
| 6  | 2.801745  | -2.677712 | -2.143825 |
| 6  | 5.045632  | -3.202842 | -1.435182 |
| 1  | 5.788704  | -2.119243 | 0.292209  |

S138

|    |           |           |           |
|----|-----------|-----------|-----------|
| 6  | 3.973140  | -3.404081 | -2.301154 |
| 1  | 1.956265  | -2.819809 | -2.810987 |
| 1  | 5.959759  | -3.776356 | -1.563821 |
| 1  | 4.050163  | -4.132553 | -3.103155 |
| 6  | 1.531528  | -0.972297 | -0.923732 |
| 7  | 0.567708  | -0.346434 | -0.783218 |
| 6  | -2.600077 | 3.115497  | -1.610410 |
| 6  | -1.201758 | 3.176351  | -2.190020 |
| 8  | -0.395843 | 2.191073  | -1.908050 |
| 8  | -0.876952 | 4.110716  | -2.910813 |
| 1  | -3.296644 | 2.981600  | -2.448814 |
| 7  | -2.734609 | 2.018494  | -0.655783 |
| 6  | -3.742244 | 1.983792  | 0.144560  |
| 8  | -3.951672 | 1.067439  | 1.039710  |
| 8  | 3.654943  | -0.655540 | 0.804603  |
| 16 | 4.276361  | 0.858457  | 0.545114  |
| 8  | 3.664853  | 1.385160  | -0.663896 |
| 6  | 2.143882  | 1.747932  | 2.061216  |
| 6  | 1.376126  | 0.821106  | 2.769925  |
| 6  | 1.518035  | 2.816947  | 1.415891  |
| 6  | -0.001038 | 0.985018  | 2.867528  |
| 1  | 1.868264  | -0.017784 | 3.261026  |
| 6  | 0.139828  | 2.976952  | 1.509776  |
| 1  | 2.117626  | 3.526900  | 0.847528  |
| 6  | -0.617507 | 2.069887  | 2.248194  |
| 1  | -0.598049 | 0.261285  | 3.418432  |
| 1  | -0.347822 | 3.806255  | 0.999073  |
| 1  | -1.695686 | 2.197804  | 2.330924  |
| 8  | -1.977716 | -0.519993 | 0.690666  |
| 1  | -3.234896 | 0.345719  | 0.982006  |
| 1  | -4.500668 | 2.773113  | 0.104221  |
| 1  | -2.830918 | 4.078855  | -1.139044 |
| 6  | -2.122457 | -1.842988 | 0.355743  |
| 1  | -1.175667 | -2.335953 | 0.070435  |
| 6  | -2.625767 | -2.570326 | 1.602099  |
| 6  | -3.071185 | -2.021811 | -0.831232 |
| 9  | -3.868307 | -2.189853 | 1.920077  |
| 9  | -1.838904 | -2.289542 | 2.641262  |
| 9  | -2.631547 | -3.895477 | 1.450261  |
| 9  | -3.424033 | -3.294105 | -1.024528 |
| 9  | -4.187491 | -1.303843 | -0.682053 |
| 9  | -2.475308 | -1.599362 | -1.954603 |

-----  
---  
**[3h]**  
-----  
---

Number of imaginary frequencies : 0

Electronic energy : =-2530.8004713  
Zero-point correction= 0.360477  
Thermal correction to Energy= 0.394414  
Thermal correction to Enthalpy= 0.395358  
Thermal correction to Gibbs Free Energy= 0.294061  
Sum of electronic and zero-point Energies= -2530.439994  
Sum of electronic and thermal Energies= -2530.406057  
Sum of electronic and thermal Enthalpies= -2530.405113  
Sum of electronic and thermal Free Energies= -2530.506410

.....  
Cartesian Coordinates  
.....

|    |           |           |           |
|----|-----------|-----------|-----------|
| 46 | -1.181053 | -0.158309 | -1.384015 |
| 6  | 1.482390  | 2.678294  | -0.156856 |
| 1  | 2.080382  | 3.472696  | -0.617982 |
| 1  | 1.043037  | 2.052834  | -0.945644 |
| 8  | 1.999177  | 0.467011  | 1.278464  |
| 6  | 4.043887  | -0.148427 | -0.599844 |
| 6  | 3.263410  | -1.252807 | -0.976931 |
| 6  | 5.368476  | -0.305295 | -0.240789 |
| 6  | 3.828278  | -2.531826 | -0.999008 |
| 6  | 5.923620  | -1.583111 | -0.271060 |
| 1  | 5.948488  | 0.567903  | 0.047180  |
| 6  | 5.162021  | -2.686686 | -0.648241 |
| 1  | 3.216408  | -3.382989 | -1.284361 |
| 1  | 6.966413  | -1.715628 | 0.004918  |
| 1  | 5.609899  | -3.675976 | -0.665917 |
| 6  | 1.894611  | -1.029270 | -1.275017 |
| 7  | 0.781485  | -0.785463 | -1.483514 |
| 6  | -3.041813 | 2.054385  | -1.584345 |
| 6  | -1.744168 | 2.487686  | -2.236973 |
| 8  | -0.789007 | 1.600003  | -2.308035 |
| 8  | -1.613821 | 3.631321  | -2.650179 |
| 1  | -3.881464 | 2.319239  | -2.238245 |
| 7  | -3.030140 | 0.625753  | -1.285510 |
| 6  | -4.125184 | -0.006238 | -1.050654 |
| 8  | -4.206537 | -1.270564 | -0.760642 |
| 8  | 3.479615  | 1.115247  | -0.644359 |
| 16 | 2.652044  | 1.629718  | 0.696278  |
| 8  | 3.566067  | 2.409130  | 1.514229  |
| 6  | 0.462541  | 3.190142  | 0.812235  |
| 6  | -0.640232 | 2.397237  | 1.141425  |
| 6  | 0.618368  | 4.439770  | 1.413030  |
| 6  | -1.590539 | 2.859466  | 2.044050  |
| 1  | -0.748234 | 1.411478  | 0.683645  |
| 6  | -0.334079 | 4.901861  | 2.315613  |

|   |           |           |           |
|---|-----------|-----------|-----------|
| 1 | 1.484450  | 5.050862  | 1.162134  |
| 6 | -1.439280 | 4.114806  | 2.629017  |
| 1 | -2.449189 | 2.237098  | 2.289497  |
| 1 | -0.213148 | 5.880186  | 2.775225  |
| 1 | -2.183841 | 4.480536  | 3.332697  |
| 8 | -1.700932 | -1.914297 | -0.485131 |
| 1 | -3.286702 | -1.675446 | -0.670970 |
| 6 | -1.093900 | -2.152241 | 0.729676  |
| 6 | -0.605213 | -3.598021 | 0.723351  |
| 6 | -2.051435 | -1.854159 | 1.879705  |
| 1 | -0.202489 | -1.527869 | 0.919184  |
| 9 | -1.595427 | -4.452885 | 0.462273  |
| 9 | 0.319186  | -3.747580 | -0.230685 |
| 9 | -0.050579 | -3.958624 | 1.883227  |
| 9 | -3.138575 | -2.630046 | 1.837299  |
| 9 | -1.479432 | -2.014809 | 3.073408  |
| 9 | -2.464332 | -0.582581 | 1.799129  |
| 1 | -3.147176 | 2.634660  | -0.656950 |
| 1 | -5.085146 | 0.517625  | -1.093921 |

-----  
 ---  
 C-H bond activation at the *meta*, *ortho* and *para* position transition states at the SMD/M06/6-31G\*\* level of theory  
 -----

---  
 C-H activation Transition states [A to H]  
 -----

---  
*meta-A*  
 -----  
 ---

Number of imaginary frequencies : 1  
 The smallest frequency is : -1591.4745 cm(-1)

Electronic energy : =-1801.5891205  
 Zero-point correction= 0.322012  
 Thermal correction to Energy= 0.349671  
 Thermal correction to Enthalpy= 0.350615  
 Thermal correction to Gibbs Free Energy= 0.262217  
 Sum of electronic and zero-point Energies= -1801.267109  
 Sum of electronic and thermal Energies= -1801.239450  
 Sum of electronic and thermal Enthalpies= -1801.238506  
 Sum of electronic and thermal Free Energies= -1801.326903

-----  
 Cartesian Coordinates  
 -----

|   |          |           |          |
|---|----------|-----------|----------|
| 6 | 1.087155 | -2.565927 | 1.845154 |
|---|----------|-----------|----------|

|    |           |           |           |
|----|-----------|-----------|-----------|
| 6  | -0.006277 | -2.143293 | 2.593632  |
| 6  | -1.143337 | -1.683840 | 1.940637  |
| 6  | -1.210493 | -1.667105 | 0.535398  |
| 6  | -0.106966 | -2.137128 | -0.200839 |
| 6  | 1.043423  | -2.575830 | 0.445667  |
| 1  | 1.997146  | -2.892417 | 2.347399  |
| 1  | 0.041563  | -2.156892 | 3.679661  |
| 1  | -1.998268 | -1.332413 | 2.517817  |
| 1  | -0.145961 | -2.131980 | -1.290769 |
| 6  | 2.263331  | -2.966711 | -0.326181 |
| 8  | 2.316579  | -0.793664 | -1.925493 |
| 6  | 3.522943  | 0.669459  | 0.312404  |
| 6  | 2.487205  | 1.615243  | 0.255751  |
| 6  | 4.847111  | 1.066503  | 0.318835  |
| 6  | 2.799206  | 2.979741  | 0.218434  |
| 6  | 5.144407  | 2.426544  | 0.277231  |
| 1  | 5.626917  | 0.311307  | 0.370207  |
| 6  | 4.128054  | 3.377541  | 0.230526  |
| 1  | 1.993934  | 3.708083  | 0.177283  |
| 1  | 6.183844  | 2.743502  | 0.285372  |
| 1  | 4.372123  | 4.435577  | 0.203240  |
| 6  | 1.130695  | 1.194744  | 0.204408  |
| 7  | 0.022611  | 0.866361  | 0.130608  |
| 46 | -1.904727 | 0.256021  | -0.139388 |
| 6  | -5.752853 | -1.599586 | -0.766985 |
| 6  | -4.302635 | -1.391470 | -0.463829 |
| 8  | -3.580242 | -2.409639 | -0.279272 |
| 8  | -3.881018 | -0.195126 | -0.423330 |
| 1  | -2.385821 | -1.990232 | 0.058750  |
| 1  | -6.306785 | -0.660307 | -0.729462 |
| 1  | -5.839943 | -2.031536 | -1.770106 |
| 1  | -6.174995 | -2.320055 | -0.060662 |
| 6  | -2.952351 | 4.397558  | -0.402527 |
| 6  | -2.569689 | 3.029254  | 0.107957  |
| 8  | -2.408594 | 2.156152  | -0.833460 |
| 8  | -2.441622 | 2.805910  | 1.315735  |
| 1  | -3.917788 | 4.341531  | -0.917069 |
| 1  | -2.217096 | 4.750472  | -1.133145 |
| 1  | -3.022464 | 5.110887  | 0.422242  |
| 8  | 3.204240  | -0.675193 | 0.420398  |
| 8  | 4.489797  | -1.904827 | -1.365145 |
| 16 | 3.134775  | -1.542649 | -0.984735 |
| 1  | 3.003308  | -3.499496 | 0.281680  |
| 1  | 2.046339  | -3.568198 | -1.218569 |

---

*meta-B*

-----  
---  
Number of imaginary frequencies : 1  
The smallest frequency is : -1683.2556 cm(-1)

Electronic energy : =-1970.2030655  
Zero-point correction= 0.350666  
Thermal correction to Energy= 0.380819  
Thermal correction to Enthalpy= 0.381763  
Thermal correction to Gibbs Free Energy= 0.288172  
Sum of electronic and zero-point Energies= -1969.852400  
Sum of electronic and thermal Energies= -1969.822247  
Sum of electronic and thermal Enthalpies= -1969.821302  
Sum of electronic and thermal Free Energies= -1969.914893

.....  
Cartesian Coordinates  
.....

|    |           |           |           |
|----|-----------|-----------|-----------|
| 46 | 1.900586  | -0.383885 | 0.223927  |
| 6  | -0.072763 | -3.672335 | 1.775954  |
| 6  | 1.015833  | -2.991540 | 1.244842  |
| 6  | 0.897764  | -2.270716 | 0.041076  |
| 6  | -0.341435 | -2.260037 | -0.623740 |
| 6  | -1.434266 | -2.938047 | -0.097183 |
| 6  | -1.293311 | -3.632002 | 1.110796  |
| 1  | -0.445480 | -1.709094 | -1.558657 |
| 1  | 1.943757  | -2.409924 | -0.724370 |
| 1  | 1.979498  | -3.022904 | 1.753740  |
| 1  | -2.157050 | -4.149509 | 1.527099  |
| 6  | -2.766922 | -2.892529 | -0.770208 |
| 8  | -3.610791 | -1.295404 | 1.239795  |
| 6  | -3.274191 | 0.966929  | -0.538576 |
| 6  | -2.221717 | 1.668992  | 0.067366  |
| 6  | -4.511263 | 1.559444  | -0.718415 |
| 6  | -2.418124 | 2.989607  | 0.489806  |
| 6  | -4.700890 | 2.866412  | -0.276148 |
| 1  | -5.308472 | 1.008703  | -1.209611 |
| 6  | -3.663801 | 3.576754  | 0.322134  |
| 1  | -1.581561 | 3.532024  | 0.926729  |
| 1  | -5.671749 | 3.335761  | -0.413000 |
| 1  | -3.823886 | 4.599374  | 0.651889  |
| 6  | -0.957189 | 1.038415  | 0.222374  |
| 7  | 0.070062  | 0.514580  | 0.331965  |
| 6  | 4.000869  | -2.152713 | -0.679045 |
| 8  | 3.095824  | -2.784187 | -1.290529 |
| 6  | 5.423035  | -2.568998 | -0.880908 |
| 1  | 6.100752  | -1.997342 | -0.245175 |
| 1  | 5.519267  | -3.638892 | -0.672796 |
| 1  | 5.688137  | -2.414472 | -1.932244 |

|    |           |           |           |
|----|-----------|-----------|-----------|
| 1  | 0.021763  | -4.228329 | 2.705285  |
| 8  | 3.782701  | -1.175064 | 0.103821  |
| 6  | 3.217867  | 3.700686  | 0.222451  |
| 6  | 2.659879  | 2.345782  | -0.218042 |
| 8  | 2.827424  | 1.426795  | 0.667446  |
| 8  | 2.136249  | 2.213834  | -1.324343 |
| 1  | 4.213809  | 3.824957  | -0.213445 |
| 1  | 3.321865  | 3.714967  | 1.312722  |
| 7  | 2.380550  | 4.791007  | -0.222100 |
| 1  | 2.728129  | 5.467965  | -0.888053 |
| 6  | 1.089600  | 4.830313  | 0.139446  |
| 8  | 0.566588  | 4.002531  | 0.884091  |
| 16 | -3.787684 | -1.542402 | -0.181690 |
| 8  | -3.022908 | -0.319895 | -0.993568 |
| 8  | -5.130928 | -1.674633 | -0.721361 |
| 1  | -3.377850 | -3.779660 | -0.561280 |
| 1  | -2.713419 | -2.758522 | -1.856997 |
| 1  | 0.537082  | 5.684652  | -0.291198 |

-----  
 ---  
*meta-C1*  
 -----  
 ---

Number of imaginary frequencies : 1  
 The smallest frequency is : -1690.8244 cm(-1)

Electronic energy : =-1741.2143863  
 Zero-point correction= 0.287090  
 Thermal correction to Energy= 0.311117  
 Thermal correction to Enthalpy= 0.312061  
 Thermal correction to Gibbs Free Energy= 0.232674  
 Sum of electronic and zero-point Energies= -1740.927297  
 Sum of electronic and thermal Energies= -1740.903270  
 Sum of electronic and thermal Enthalpies= -1740.902325  
 Sum of electronic and thermal Free Energies= -1740.981712

-----  
 Cartesian Coordinates  
 -----

|    |           |           |           |
|----|-----------|-----------|-----------|
| 46 | 2.097879  | 0.252390  | -0.002499 |
| 6  | 0.022501  | -2.632394 | 2.114542  |
| 6  | 1.161256  | -2.094001 | 1.528200  |
| 6  | 1.155785  | -1.678156 | 0.182604  |
| 6  | -0.031776 | -1.822867 | -0.558697 |
| 6  | -1.171243 | -2.373223 | 0.015958  |
| 6  | -1.137060 | -2.771299 | 1.358624  |
| 1  | -0.064253 | -1.497441 | -1.599373 |



|    |           |           |           |
|----|-----------|-----------|-----------|
| 1  | 2.245877  | -2.022787 | -0.429704 |
| 1  | 2.083653  | -2.010731 | 2.103073  |
| 1  | -2.028189 | -3.205635 | 1.809808  |
| 6  | -2.420209 | -2.526335 | -0.790227 |
| 8  | -3.876717 | -1.146520 | 1.016976  |
| 6  | -3.215657 | 1.253643  | -0.401774 |
| 6  | -2.191943 | 2.011825  | 0.183047  |
| 6  | -4.509336 | 1.741895  | -0.462285 |
| 6  | -2.475121 | 3.277843  | 0.710075  |
| 6  | -4.781289 | 2.994886  | 0.080503  |
| 1  | -5.292951 | 1.156982  | -0.936869 |
| 6  | -3.773415 | 3.760771  | 0.662155  |
| 1  | -1.672003 | 3.860691  | 1.152290  |
| 1  | -5.797061 | 3.378783  | 0.037416  |
| 1  | -4.000089 | 4.739596  | 1.074513  |
| 6  | -0.869738 | 1.495497  | 0.205110  |
| 7  | 0.210502  | 1.077100  | 0.202506  |
| 6  | 4.979475  | 0.633624  | -0.105221 |
| 6  | 4.359091  | 2.018893  | -0.155368 |
| 8  | 3.064240  | 2.087273  | -0.106901 |
| 8  | 5.085902  | 3.007522  | -0.204753 |
| 1  | 5.484456  | 0.544951  | 0.867669  |
| 7  | 3.965620  | -0.398706 | -0.259649 |
| 6  | 4.255537  | -1.597672 | -0.687141 |
| 8  | 3.412518  | -2.523726 | -0.866633 |
| 1  | 0.034035  | -2.955505 | 3.152481  |
| 8  | -2.860386 | 0.032216  | -0.951086 |
| 16 | -3.673655 | -1.306311 | -0.412740 |
| 8  | -4.821871 | -1.511860 | -1.279100 |
| 1  | -2.938935 | -3.476960 | -0.607735 |
| 1  | -2.248624 | -2.434445 | -1.869091 |
| 1  | 5.315319  | -1.808693 | -0.903039 |
| 1  | 5.751313  | 0.556657  | -0.881302 |

-----  
---  
*meta-C [4]*  
-----  
---

Number of imaginary frequencies : 0

Electronic energy : =-1741.2375988  
Zero-point correction= 0.292365  
Thermal correction to Energy= 0.316926  
Thermal correction to Enthalpy= 0.317870  
Thermal correction to Gibbs Free Energy= 0.237367  
Sum of electronic and zero-point Energies= -1740.945233

|                                              |              |
|----------------------------------------------|--------------|
| Sum of electronic and thermal Energies=      | -1740.920673 |
| Sum of electronic and thermal Enthalpies=    | -1740.919729 |
| Sum of electronic and thermal Free Energies= | -1741.000232 |

.....  
 Cartesian Coordinates  
 .....

|    |           |           |           |
|----|-----------|-----------|-----------|
| 46 | -1.943176 | 0.167854  | 0.016459  |
| 6  | -1.331976 | -2.189522 | -0.309639 |
| 6  | -1.717140 | -1.951881 | 1.026589  |
| 6  | -0.731438 | -1.919164 | 2.039461  |
| 6  | 0.586554  | -2.166994 | 1.724926  |
| 6  | 0.967359  | -2.447203 | 0.395232  |
| 6  | 0.021052  | -2.424795 | -0.614235 |
| 1  | 1.344788  | -2.176999 | 2.506176  |
| 1  | -1.025692 | -1.744531 | 3.071021  |
| 1  | -2.768836 | -1.982405 | 1.304265  |
| 1  | 0.308886  | -2.646124 | -1.640265 |
| 6  | 2.392873  | -2.783392 | 0.087577  |
| 1  | 2.485969  | -3.580341 | -0.661692 |
| 1  | 2.966143  | -3.077509 | 0.974636  |
| 8  | 2.589056  | -0.805553 | -1.732921 |
| 6  | 3.485033  | 0.929420  | 0.403983  |
| 6  | 2.404803  | 1.796475  | 0.188550  |
| 6  | 4.785829  | 1.394712  | 0.397455  |
| 6  | 2.640808  | 3.159200  | -0.021526 |
| 6  | 5.010056  | 2.752782  | 0.181331  |
| 1  | 5.602230  | 0.698437  | 0.568997  |
| 6  | 3.946715  | 3.628922  | -0.023892 |
| 1  | 1.800825  | 3.827909  | -0.186199 |
| 1  | 6.029831  | 3.128155  | 0.176201  |
| 1  | 4.136248  | 4.685639  | -0.188812 |
| 6  | 1.090436  | 1.258815  | 0.164348  |
| 7  | 0.037016  | 0.778997  | 0.135330  |
| 6  | -4.589281 | 1.210871  | 0.220956  |
| 6  | -3.707748 | 2.390054  | -0.113822 |
| 8  | -2.442395 | 2.120519  | -0.298857 |
| 8  | -4.145854 | 3.532402  | -0.165573 |
| 1  | -5.548774 | 1.312166  | -0.302336 |
| 7  | -3.928610 | -0.040719 | -0.114466 |
| 6  | -4.642204 | -1.048332 | -0.620747 |
| 8  | -4.246527 | -2.157542 | -0.986797 |
| 1  | -2.106550 | -2.327787 | -1.061287 |
| 8  | 3.215916  | -0.406907 | 0.662806  |
| 8  | 4.697390  | -1.807177 | -0.816685 |
| 16 | 3.307510  | -1.427283 | -0.633494 |
| 1  | -4.804209 | 1.275997  | 1.299561  |
| 1  | -5.724848 | -0.791043 | -0.682595 |

-----  
---  
*meta-C [4-5]*‡  
-----  
---

Number of imaginary frequencies : 1  
The smallest frequency is : -1635.3265 cm(-1)

Electronic energy : =-1741.2152073  
Zero-point correction= 0.286926  
Thermal correction to Energy= 0.311012  
Thermal correction to Enthalpy= 0.311956  
Thermal correction to Gibbs Free Energy= 0.232075  
Sum of electronic and zero-point Energies= -1740.928282  
Sum of electronic and thermal Energies= -1740.904195  
Sum of electronic and thermal Enthalpies= -1740.903251  
Sum of electronic and thermal Free Energies= -1740.983132

.....  
Cartesian Coordinates  
.....

|    |           |           |           |
|----|-----------|-----------|-----------|
| 46 | -1.986766 | 0.270893  | 0.055392  |
| 6  | -1.214749 | -1.711838 | 0.411396  |
| 6  | -1.151168 | -1.933779 | 1.800848  |
| 6  | 0.008968  | -2.414197 | 2.395139  |
| 6  | 1.124401  | -2.670263 | 1.604460  |
| 6  | 1.084368  | -2.483978 | 0.217824  |
| 6  | -0.083020 | -2.008540 | -0.370491 |
| 1  | 2.046858  | -3.025587 | 2.062222  |
| 1  | 0.054196  | -2.583024 | 3.468254  |
| 1  | -2.030844 | -1.727878 | 2.410579  |
| 1  | -0.116419 | -1.842776 | -1.447674 |
| 6  | 2.319628  | -2.728633 | -0.589011 |
| 1  | 2.130844  | -3.250563 | -1.536492 |
| 1  | 3.087385  | -3.281366 | -0.036123 |
| 8  | 2.252759  | -0.408398 | -1.957407 |
| 6  | 3.454417  | 0.874257  | 0.386834  |
| 6  | 2.393448  | 1.790367  | 0.443197  |
| 6  | 4.767786  | 1.305205  | 0.388119  |
| 6  | 2.668338  | 3.161445  | 0.509407  |
| 6  | 5.028345  | 2.672024  | 0.450316  |
| 1  | 5.568592  | 0.571559  | 0.350935  |
| 6  | 3.986515  | 3.594299  | 0.512173  |
| 1  | 1.844232  | 3.868158  | 0.552954  |
| 1  | 6.058949  | 3.016684  | 0.452826  |
| 1  | 4.202240  | 4.657682  | 0.562181  |
| 6  | 1.050364  | 1.326550  | 0.402523  |
| 7  | -0.046285 | 0.956944  | 0.344874  |
| 6  | -4.805113 | 0.895370  | -0.339420 |

|    |           |           |           |
|----|-----------|-----------|-----------|
| 6  | -4.057722 | 2.215101  | -0.369260 |
| 8  | -2.770779 | 2.173122  | -0.210342 |
| 8  | -4.685780 | 3.259541  | -0.519617 |
| 1  | -5.448040 | 0.839836  | -1.227316 |
| 7  | -3.887254 | -0.234128 | -0.278810 |
| 6  | -4.291317 | -1.451837 | -0.514865 |
| 8  | -3.553078 | -2.480205 | -0.488460 |
| 1  | -2.366218 | -2.052265 | -0.108389 |
| 8  | 3.167394  | -0.482311 | 0.378178  |
| 8  | 4.481536  | -1.470936 | -1.533459 |
| 16 | 3.117422  | -1.209654 | -1.105459 |
| 1  | -5.463676 | 0.915323  | 0.540224  |
| 1  | -5.358197 | -1.587925 | -0.753580 |

-----  
 ---  
*meta-C [5]*  
 -----  
 ---

Number of imaginary frequencies : 0

Electronic energy : =-1741.2380436  
 Zero-point correction= 0.293389  
 Thermal correction to Energy= 0.317879  
 Thermal correction to Enthalpy= 0.318823  
 Thermal correction to Gibbs Free Energy= 0.238454  
 Sum of electronic and zero-point Energies= -1740.944655  
 Sum of electronic and thermal Energies= -1740.920165  
 Sum of electronic and thermal Enthalpies= -1740.919220  
 Sum of electronic and thermal Free Energies= -1740.999590

.....  
 Cartesian Coordinates  
 .....

|    |           |           |           |
|----|-----------|-----------|-----------|
| 46 | -1.958819 | 0.417934  | 0.013085  |
| 6  | -0.967022 | -1.263945 | 0.478933  |
| 6  | -1.227281 | -1.956286 | 1.664105  |
| 6  | -0.327307 | -2.923773 | 2.110187  |
| 6  | 0.842256  | -3.178460 | 1.400198  |
| 6  | 1.083623  | -2.517977 | 0.195374  |
| 6  | 0.150624  | -1.597162 | -0.283544 |
| 1  | 1.572912  | -3.889738 | 1.781973  |
| 1  | -0.523987 | -3.458606 | 3.037340  |
| 1  | -2.116141 | -1.731249 | 2.252804  |
| 1  | 0.344239  | -1.073995 | -1.218821 |
| 6  | 2.376928  | -2.746967 | -0.525780 |
| 1  | 2.257574  | -3.233109 | -1.504459 |
| 1  | 3.081004  | -3.340855 | 0.067096  |

|    |           |           |           |
|----|-----------|-----------|-----------|
| 8  | 2.611517  | -0.506826 | -2.016809 |
| 6  | 3.402461  | 0.935561  | 0.427536  |
| 6  | 2.406964  | 1.923367  | 0.340563  |
| 6  | 4.736982  | 1.286387  | 0.534876  |
| 6  | 2.772246  | 3.275573  | 0.363972  |
| 6  | 5.085808  | 2.634317  | 0.546992  |
| 1  | 5.488522  | 0.506522  | 0.619198  |
| 6  | 4.110799  | 3.624134  | 0.461717  |
| 1  | 1.996775  | 4.034252  | 0.301212  |
| 1  | 6.133775  | 2.910093  | 0.629485  |
| 1  | 4.393380  | 4.672730  | 0.476209  |
| 6  | 1.033405  | 1.571279  | 0.235968  |
| 7  | -0.092017 | 1.305425  | 0.152402  |
| 6  | -4.851506 | 0.617510  | 0.122393  |
| 6  | -4.381424 | 2.017924  | -0.262899 |
| 8  | -3.117343 | 2.192661  | -0.403301 |
| 8  | -5.237730 | 2.898943  | -0.372634 |
| 1  | -5.789589 | 0.386899  | -0.397009 |
| 7  | -3.831411 | -0.394730 | -0.144443 |
| 6  | -4.187578 | -1.539677 | -0.590829 |
| 8  | -3.369426 | -2.517603 | -0.900153 |
| 1  | -2.442700 | -2.247362 | -0.716099 |
| 8  | 3.028337  | -0.401766 | 0.452942  |
| 8  | 4.686609  | -1.540844 | -1.078548 |
| 16 | 3.268837  | -1.247105 | -0.950189 |
| 1  | -5.063722 | 0.639423  | 1.200445  |
| 1  | -5.239370 | -1.788518 | -0.754510 |

-----  
---  
*meta-D*  
-----  
---

Number of imaginary frequencies : 1  
The smallest frequency is : -1741.8994 cm(-1)

Electronic energy : =-1970.1840835  
Zero-point correction= 0.350068  
Thermal correction to Energy= 0.380084  
Thermal correction to Enthalpy= 0.381028  
Thermal correction to Gibbs Free Energy= 0.287102  
Sum of electronic and zero-point Energies= -1969.834015  
Sum of electronic and thermal Energies= -1969.803999  
Sum of electronic and thermal Enthalpies= -1969.803055  
Sum of electronic and thermal Free Energies= -1969.896982

.....  
Cartesian Coordinates

.....

|    |           |           |           |
|----|-----------|-----------|-----------|
| 46 | 1.364397  | 0.784313  | 0.003653  |
| 6  | 0.982795  | -1.300910 | -0.368499 |
| 6  | 0.983872  | -1.415991 | -1.777390 |
| 6  | -0.081253 | -2.001461 | -2.447635 |
| 6  | -1.163310 | -2.484802 | -1.718885 |
| 6  | -1.187404 | -2.414944 | -0.319445 |
| 6  | -0.126464 | -1.812869 | 0.343620  |
| 1  | 2.084419  | -1.629367 | 0.209645  |
| 8  | 3.088119  | -2.353202 | 0.742434  |
| 1  | -2.010760 | -2.930832 | -2.238239 |
| 1  | -0.078135 | -2.081521 | -3.531597 |
| 1  | 1.839722  | -1.043598 | -2.339675 |
| 1  | -0.142846 | -1.731715 | 1.431328  |
| 6  | -2.380808 | -2.933753 | 0.418639  |
| 8  | -2.780445 | -0.745292 | 1.933325  |
| 6  | -4.094050 | 0.473046  | -0.377227 |
| 6  | -3.183904 | 1.539629  | -0.326627 |
| 6  | -5.456068 | 0.703628  | -0.420548 |
| 6  | -3.658046 | 2.856411  | -0.333361 |
| 6  | -5.916728 | 2.018324  | -0.423592 |
| 1  | -6.136793 | -0.142501 | -0.461363 |
| 6  | -5.025031 | 3.087608  | -0.383456 |
| 1  | -2.948679 | 3.678425  | -0.295538 |
| 1  | -6.986423 | 2.206427  | -0.460812 |
| 1  | -5.396437 | 4.108146  | -0.390076 |
| 6  | -1.790385 | 1.278487  | -0.243791 |
| 7  | -0.654748 | 1.071002  | -0.152723 |
| 6  | 4.906871  | -3.702198 | 0.064814  |
| 6  | 4.058972  | -2.471339 | -0.092619 |
| 8  | 4.302330  | -1.645816 | -0.996242 |
| 6  | 3.879631  | 2.032934  | -0.528760 |
| 6  | 2.928218  | 3.165690  | -0.182107 |
| 8  | 1.724568  | 2.822902  | 0.166018  |
| 8  | 3.298703  | 4.329450  | -0.278898 |
| 1  | 4.898463  | 2.289661  | -0.221390 |
| 1  | 5.828537  | -3.625212 | -0.516595 |
| 1  | 5.140844  | -3.871910 | 1.120442  |
| 1  | 4.337668  | -4.572806 | -0.281919 |
| 7  | 3.455313  | 0.761059  | 0.088322  |
| 1  | 3.765349  | -0.102499 | -0.422491 |
| 6  | 3.707824  | 0.668864  | 1.484294  |
| 8  | 4.006038  | 1.628759  | 2.152696  |
| 8  | -3.603315 | -0.821792 | -0.437279 |
| 8  | -4.763364 | -2.164095 | 1.354623  |
| 16 | -3.460614 | -1.628255 | 0.999692  |
| 1  | -3.014855 | -3.579902 | -0.198830 |
| 1  | -2.122608 | -3.478693 | 1.335768  |
| 1  | 3.589402  | -0.359714 | 1.865727  |

1 3.867236 1.891449 -1.614653

-----  
---  
*meta-E*  
-----  
---

Number of imaginary frequencies : 1  
The smallest frequency is : -1703.8079 cm(-1)

Electronic energy : =-1801.5763097  
Zero-point correction= 0.322567  
Thermal correction to Energy= 0.349964  
Thermal correction to Enthalpy= 0.350909  
Thermal correction to Gibbs Free Energy= 0.263052  
Sum of electronic and zero-point Energies= -1801.253743  
Sum of electronic and thermal Energies= -1801.226345  
Sum of electronic and thermal Enthalpies= -1801.225401  
Sum of electronic and thermal Free Energies= -1801.313257

-----  
Cartesian Coordinates  
-----

|    |           |           |           |
|----|-----------|-----------|-----------|
| 46 | -2.987113 | 0.465489  | 0.006757  |
| 6  | -0.322013 | -0.800266 | -0.155235 |
| 1  | -0.028659 | 0.022229  | -0.809353 |
| 8  | -0.734454 | 1.839149  | 1.591339  |
| 8  | -1.976475 | 2.233998  | -0.228751 |
| 6  | -1.340313 | -0.597869 | 0.790552  |
| 6  | -1.690430 | -1.656142 | 1.652343  |
| 6  | -1.039830 | -2.877334 | 1.559869  |
| 6  | -0.037280 | -3.062263 | 0.608257  |
| 6  | 0.336553  | -2.022689 | -0.247827 |
| 1  | -1.213880 | 0.581085  | 1.293747  |
| 1  | -2.478921 | -1.513480 | 2.389171  |
| 1  | -1.311109 | -3.695494 | 2.222238  |
| 1  | 0.459728  | -4.027951 | 0.528865  |
| 6  | 1.446505  | -2.190978 | -1.234846 |
| 8  | 4.089647  | -1.962401 | -1.509917 |
| 6  | 3.937166  | 0.310207  | 0.179484  |
| 6  | 3.662375  | 1.557653  | -0.393827 |
| 6  | 5.182278  | 0.027472  | 0.714574  |
| 6  | 4.663205  | 2.535244  | -0.424134 |
| 6  | 6.171472  | 1.004618  | 0.666595  |
| 1  | 5.368463  | -0.940173 | 1.175322  |
| 6  | 5.915330  | 2.252294  | 0.101787  |
| 1  | 4.444575  | 3.504791  | -0.863504 |
| 1  | 7.151449  | 0.788736  | 1.084256  |

|    |           |           |           |
|----|-----------|-----------|-----------|
| 1  | 6.694091  | 3.009271  | 0.075404  |
| 6  | 2.364391  | 1.817722  | -0.924119 |
| 7  | 1.304916  | 2.029861  | -1.356616 |
| 6  | -1.127561 | 2.583051  | 0.654025  |
| 6  | -0.606417 | 3.984135  | 0.569999  |
| 1  | -1.237755 | 4.621022  | 1.200885  |
| 1  | 0.416380  | 4.031566  | 0.950831  |
| 1  | -0.654099 | 4.356777  | -0.455148 |
| 6  | -6.571487 | -0.963412 | -0.914814 |
| 6  | -5.257832 | -0.376329 | -0.553702 |
| 8  | -4.966634 | 0.826451  | -0.830722 |
| 8  | -4.370659 | -1.095875 | 0.026988  |
| 1  | -7.324075 | -0.178933 | -1.026047 |
| 1  | -6.885349 | -1.691792 | -0.162187 |
| 1  | -6.470366 | -1.488132 | -1.872205 |
| 8  | 2.894064  | -0.597466 | 0.242647  |
| 8  | 3.219295  | -3.045231 | 0.584586  |
| 16 | 3.068279  | -2.071461 | -0.482606 |
| 1  | 1.439513  | -1.419034 | -2.013962 |
| 1  | 1.455390  | -3.178294 | -1.714378 |

-----  
---  
*meta-F*  
-----  
---

Number of imaginary frequencies : 1  
The smallest frequency is : -1560.8841 cm(-1)

Electronic energy : =-1970.1895143  
Zero-point correction= 0.349461  
Thermal correction to Energy= 0.380176  
Thermal correction to Enthalpy= 0.381120  
Thermal correction to Gibbs Free Energy= 0.284808  
Sum of electronic and zero-point Energies= -1969.840053  
Sum of electronic and thermal Energies= -1969.809338  
Sum of electronic and thermal Enthalpies= -1969.808394  
Sum of electronic and thermal Free Energies= -1969.904707

.....  
Cartesian Coordinates  
.....

|    |           |           |           |
|----|-----------|-----------|-----------|
| 46 | 1.265041  | 0.559159  | -0.100776 |
| 6  | -2.109236 | -1.316243 | 2.361321  |
| 1  | -3.068261 | -1.411184 | 2.869525  |
| 6  | -1.028266 | -0.749625 | 3.030048  |
| 6  | 0.180835  | -0.594797 | 2.365346  |
| 6  | 0.322345  | -1.015977 | 1.030281  |



|    |           |           |           |
|----|-----------|-----------|-----------|
| 6  | -0.770725 | -1.625401 | 0.386813  |
| 6  | -1.990741 | -1.771787 | 1.041827  |
| 1  | -1.142344 | -0.417358 | 4.058993  |
| 1  | 1.028400  | -0.134323 | 2.872420  |
| 1  | 1.489375  | -1.575327 | 0.772350  |
| 1  | -0.657096 | -1.956401 | -0.645346 |
| 6  | -3.202226 | -2.394851 | 0.411139  |
| 1  | -4.115858 | -2.155073 | 0.968320  |
| 1  | -3.137393 | -3.490412 | 0.343970  |
| 8  | -4.956195 | -2.195684 | -1.549213 |
| 6  | -3.971263 | 0.599315  | -0.531961 |
| 6  | -3.174287 | 1.576464  | 0.089821  |
| 6  | -5.348500 | 0.625929  | -0.400541 |
| 6  | -3.770290 | 2.588028  | 0.850553  |
| 6  | -5.925721 | 1.631118  | 0.373557  |
| 1  | -5.962391 | -0.113972 | -0.903732 |
| 6  | -5.149348 | 2.607077  | 0.992591  |
| 1  | -3.142698 | 3.338895  | 1.322098  |
| 1  | -7.007115 | 1.654110  | 0.479784  |
| 1  | -5.620946 | 3.387191  | 1.582826  |
| 6  | -1.764083 | 1.478830  | -0.040101 |
| 7  | -0.619697 | 1.334786  | -0.149245 |
| 6  | 3.181795  | 4.188831  | -1.267029 |
| 6  | 2.611124  | 3.038801  | -0.473771 |
| 8  | 2.004359  | 2.160426  | -1.205729 |
| 8  | 2.728476  | 2.978888  | 0.754153  |
| 1  | 3.885454  | 3.814641  | -2.018293 |
| 1  | 3.691415  | 4.895874  | -0.608270 |
| 6  | 4.901086  | -1.785752 | 0.174685  |
| 6  | 3.470376  | -1.333386 | 0.252952  |
| 8  | 3.200284  | -0.152028 | -0.101682 |
| 8  | 2.636387  | -2.177382 | 0.676980  |
| 1  | 4.931677  | -2.687598 | -0.451874 |
| 1  | 5.201667  | -2.102460 | 1.183056  |
| 7  | 5.774265  | -0.760036 | -0.335713 |
| 1  | 5.377639  | 0.140067  | -0.579421 |
| 6  | 7.091952  | -0.980519 | -0.473891 |
| 8  | 7.647205  | -2.037880 | -0.194837 |
| 1  | 2.378680  | 4.704752  | -1.804251 |
| 8  | -3.284259 | -0.306250 | -1.322638 |
| 8  | -2.538307 | -2.427454 | -2.188303 |
| 16 | -3.554333 | -1.929504 | -1.283283 |
| 1  | 7.632686  | -0.101364 | -0.870907 |

-----  
---

*meta-G*

-----  
---  
Number of imaginary frequencies : 1  
The smallest frequency is : -1342.4979 cm(-1)

Electronic energy : =-1741.1576366  
Zero-point correction= 0.285878  
Thermal correction to Energy= 0.310319  
Thermal correction to Enthalpy= 0.311263  
Thermal correction to Gibbs Free Energy= 0.231019  
Sum of electronic and zero-point Energies= -1740.871759  
Sum of electronic and thermal Energies= -1740.847317  
Sum of electronic and thermal Enthalpies= -1740.846373  
Sum of electronic and thermal Free Energies= -1740.926617

-----  
Cartesian Coordinates

-----  
46 -1.978157 0.220291 0.249318  
6 -1.133876 -1.690481 0.626893  
6 -1.064155 -2.151541 1.950591  
6 0.022471 -2.909744 2.374849  
6 1.085760 -3.131473 1.505208  
6 1.043475 -2.667089 0.186556  
6 -0.084125 -1.980893 -0.255210  
1 -2.599084 -1.698231 0.184554  
1 1.971003 -3.662322 1.852613  
1 0.068026 -3.287937 3.393359  
1 -1.869231 -1.915029 2.646148  
1 -0.117928 -1.605618 -1.278663  
6 2.246339 -2.817389 -0.690441  
8 2.074357 -0.476990 -2.027059  
6 3.323883 0.821778 0.326191  
6 2.319230 1.803195 0.351926  
6 4.660586 1.176618 0.354222  
6 2.675746 3.156270 0.408598  
6 5.001067 2.526089 0.404651  
1 5.419326 0.399067 0.347106  
6 4.016620 3.510277 0.431175  
1 1.893374 3.909989 0.431540  
1 6.050439 2.807831 0.426256  
1 4.294483 4.559449 0.472303  
6 0.948727 1.430664 0.321769  
7 -0.174193 1.144627 0.305848  
6 -4.512986 0.904242 -0.922239  
6 -4.370842 -0.607649 -0.834643  
8 -3.582260 -1.029269 0.202529  
8 -4.942978 -1.388127 -1.549137  
1 -5.452041 1.145252 -0.396085

|    |           |           |           |
|----|-----------|-----------|-----------|
| 1  | -4.684556 | 1.121852  | -1.985883 |
| 7  | -3.369180 | 1.618472  | -0.387093 |
| 6  | -3.448867 | 2.921276  | -0.140775 |
| 8  | -2.561478 | 3.626155  | 0.354658  |
| 8  | 2.960239  | -0.518897 | 0.315983  |
| 8  | 4.343562  | -1.438572 | -1.590217 |
| 1  | 3.059387  | -3.368625 | -0.204768 |
| 1  | 2.034675  | -3.294194 | -1.657346 |
| 16 | 2.965550  | -1.245134 | -1.171257 |
| 1  | -4.423696 | 3.376291  | -0.440962 |

-----  
 ---  
*ortho-A*  
 -----  
 ---

Number of imaginary frequencies : 1  
 The smallest frequency is : -1651.5642 cm(-1)

Electronic energy :       =-1801.5823395  
 Zero-point correction=               0.322244  
 Thermal correction to Energy=       0.349652  
 Thermal correction to Enthalpy=     0.350597  
 Thermal correction to Gibbs Free Energy=   0.264237  
 Sum of electronic and zero-point Energies=   -1801.260095  
 Sum of electronic and thermal Energies=   -1801.232687  
 Sum of electronic and thermal Enthalpies=   -1801.231743  
 Sum of electronic and thermal Free Energies=   -1801.318102

.....  
 Cartesian Coordinates  
 .....

|    |           |           |           |
|----|-----------|-----------|-----------|
| 46 | -1.674634 | 0.226145  | -0.838814 |
| 6  | -0.814961 | -1.741337 | -0.596429 |
| 1  | -1.948617 | -1.868368 | 0.001162  |
| 8  | -3.038316 | -2.139913 | 0.734275  |
| 8  | -3.470100 | -0.028681 | 0.124487  |
| 6  | -0.704332 | -2.413950 | -1.826317 |
| 6  | 0.453807  | -3.100717 | -2.166314 |
| 6  | 1.508473  | -3.145587 | -1.258594 |
| 6  | 1.412413  | -2.520604 | -0.015052 |
| 6  | 0.270892  | -1.797935 | 0.313797  |
| 1  | -1.544231 | -2.387667 | -2.519355 |
| 1  | 0.535647  | -3.605130 | -3.126031 |
| 1  | 2.416999  | -3.688413 | -1.509933 |
| 1  | 2.237904  | -2.601365 | 0.688430  |
| 6  | 0.104564  | -1.127097 | 1.649018  |
| 1  | -0.097262 | -1.851829 | 2.451690  |

|    |           |           |           |
|----|-----------|-----------|-----------|
| 1  | -0.716126 | -0.396749 | 1.644002  |
| 8  | 2.667418  | -1.077305 | 2.454239  |
| 6  | 2.929355  | 0.772392  | 0.264597  |
| 6  | 2.677366  | 0.742780  | -1.118315 |
| 6  | 4.227595  | 0.801350  | 0.741281  |
| 6  | 3.736744  | 0.734181  | -2.029181 |
| 6  | 5.276080  | 0.781134  | -0.176107 |
| 1  | 4.416594  | 0.849852  | 1.809341  |
| 6  | 5.037363  | 0.748633  | -1.548500 |
| 1  | 3.526033  | 0.716513  | -3.094531 |
| 1  | 6.298112  | 0.802425  | 0.192868  |
| 1  | 5.869846  | 0.740962  | -2.245981 |
| 6  | 1.312406  | 0.700985  | -1.494953 |
| 7  | 0.164258  | 0.644346  | -1.645832 |
| 6  | -3.763369 | -1.108934 | 0.725643  |
| 6  | -5.048404 | -1.138029 | 1.492210  |
| 1  | -5.572128 | -2.078917 | 1.302203  |
| 1  | -4.809506 | -1.102912 | 2.561122  |
| 1  | -5.684317 | -0.288113 | 1.239422  |
| 6  | -1.774602 | 2.952481  | -0.151842 |
| 6  | -2.169505 | 4.403419  | -0.272969 |
| 1  | -1.719524 | 4.992888  | 0.529347  |
| 1  | -1.849543 | 4.799398  | -1.242681 |
| 1  | -3.259730 | 4.497826  | -0.229403 |
| 8  | -2.266331 | 2.204240  | -1.089274 |
| 8  | -1.050153 | 2.552665  | 0.766161  |
| 8  | 1.821181  | 0.867140  | 1.087035  |
| 8  | 1.039399  | 0.595326  | 3.395905  |
| 16 | 1.507946  | -0.218142 | 2.292509  |

-----  
 ---  
*ortho-B*  
 -----  
 ---

Number of imaginary frequencies : 1  
 The smallest frequency is : -1637.4965 cm(-1)

Electronic energy : =-1970.1935301  
 Zero-point correction= 0.350304  
 Thermal correction to Energy= 0.380629  
 Thermal correction to Enthalpy= 0.381574  
 Thermal correction to Gibbs Free Energy= 0.286497  
 Sum of electronic and zero-point Energies= -1969.843226  
 Sum of electronic and thermal Energies= -1969.812901  
 Sum of electronic and thermal Enthalpies= -1969.811957  
 Sum of electronic and thermal Free Energies= -1969.907033

.....  
 Cartesian Coordinates  
 .....

|    |           |           |           |
|----|-----------|-----------|-----------|
| 46 | 1.250246  | -0.577695 | -0.004396 |
| 6  | -0.269826 | -1.516660 | 1.209887  |
| 1  | 0.336635  | -2.538037 | 0.700103  |
| 8  | 0.906289  | -3.675744 | 0.282690  |
| 8  | 2.501711  | -2.188317 | -0.221453 |
| 6  | 0.048647  | -1.235453 | 2.550924  |
| 6  | -0.931639 | -0.854062 | 3.457522  |
| 6  | -2.255866 | -0.792367 | 3.034821  |
| 6  | -2.609715 | -1.116810 | 1.724219  |
| 6  | -1.625941 | -1.447934 | 0.799359  |
| 1  | 1.087651  | -1.310709 | 2.870773  |
| 1  | -0.671655 | -0.615008 | 4.485708  |
| 1  | -3.035609 | -0.504294 | 3.736388  |
| 1  | -3.658079 | -1.098938 | 1.437067  |
| 6  | -1.938683 | -1.844582 | -0.617310 |
| 1  | -2.260467 | -2.895250 | -0.679589 |
| 1  | -1.063145 | -1.729361 | -1.270049 |
| 8  | -4.496636 | -0.998469 | -0.729237 |
| 6  | -3.186408 | 1.567523  | -0.712166 |
| 6  | -2.264316 | 2.191374  | 0.145844  |
| 6  | -4.491647 | 2.017290  | -0.789880 |
| 6  | -2.657438 | 3.275915  | 0.934121  |
| 6  | -4.875524 | 3.092371  | 0.008958  |
| 1  | -5.192069 | 1.543967  | -1.471289 |
| 6  | -3.969333 | 3.720051  | 0.860930  |
| 1  | -1.934018 | 3.751559  | 1.589825  |
| 1  | -5.900272 | 3.450014  | -0.046958 |
| 1  | -4.286499 | 4.562966  | 1.467962  |
| 6  | -0.964739 | 1.628584  | 0.178052  |
| 7  | 0.034203  | 1.044882  | 0.118961  |
| 6  | 2.068242  | -3.377734 | -0.105186 |
| 6  | 4.623297  | 1.665036  | -1.373864 |
| 6  | 3.623609  | 0.915855  | -0.493185 |
| 8  | 2.623836  | 0.471631  | -1.174256 |
| 8  | 3.805226  | 0.772407  | 0.715362  |
| 1  | 4.067501  | 2.378238  | -1.992635 |
| 7  | 5.647210  | 2.349916  | -0.628605 |
| 1  | 6.544232  | 1.903578  | -0.489356 |
| 6  | 5.348710  | 3.433250  | 0.112193  |
| 8  | 4.251428  | 3.979945  | 0.129918  |
| 16 | -3.253439 | -0.983509 | -1.478036 |
| 8  | -3.223698 | -1.417466 | -2.859772 |
| 8  | -2.692413 | 0.568372  | -1.533842 |
| 6  | 3.029784  | -4.478807 | -0.424014 |
| 1  | 3.589714  | -4.720606 | 0.486872  |
| 1  | 2.492233  | -5.374280 | -0.743295 |

|   |          |           |           |
|---|----------|-----------|-----------|
| 1 | 3.741775 | -4.161690 | -1.188875 |
| 1 | 5.089975 | 0.946059  | -2.054021 |
| 1 | 6.212688 | 3.802403  | 0.697011  |

-----  
 ---  
*ortho-C*  
 -----  
 ---

Number of imaginary frequencies : 1  
 The smallest frequency is : -1642.4016 cm(-1)

Electronic energy :       =-1741.2077489  
 Zero-point correction=               0.286403  
 Thermal correction to Energy=       0.310656  
 Thermal correction to Enthalpy=     0.311601  
 Thermal correction to Gibbs Free Energy=   0.231885  
 Sum of electronic and zero-point Energies=   -1740.921346  
 Sum of electronic and thermal Energies=   -1740.897092  
 Sum of electronic and thermal Enthalpies=   -1740.896148  
 Sum of electronic and thermal Free Energies=   -1740.975863

.....  
 Cartesian Coordinates  
 .....

|    |           |           |           |
|----|-----------|-----------|-----------|
| 46 | -1.583172 | -0.333025 | -0.436695 |
| 6  | -1.409885 | 2.190103  | -1.782621 |
| 6  | -0.536615 | 2.957412  | -2.541588 |
| 6  | 0.677323  | 3.355977  | -1.986038 |
| 6  | 1.008493  | 3.002636  | -0.680706 |
| 6  | 0.152808  | 2.201717  | 0.072278  |
| 6  | -1.078162 | 1.773370  | -0.477903 |
| 1  | 1.941392  | 3.356166  | -0.243829 |
| 1  | 1.365166  | 3.967543  | -2.565708 |
| 1  | -0.800219 | 3.255732  | -3.553474 |
| 1  | -2.047579 | 1.815332  | 0.393973  |
| 6  | 0.512896  | 1.910421  | 1.499502  |
| 1  | -0.362716 | 1.639808  | 2.105346  |
| 1  | 1.009249  | 2.767072  | 1.970709  |
| 8  | 1.022490  | -0.753400 | 1.662848  |
| 6  | 3.363100  | -0.323730 | 0.035247  |
| 6  | 2.764713  | -1.159485 | -0.922470 |
| 6  | 4.659913  | -0.541545 | 0.458139  |
| 6  | 3.491984  | -2.220725 | -1.469254 |
| 6  | 5.376389  | -1.600288 | -0.095883 |
| 1  | 5.093786  | 0.120752  | 1.202878  |
| 6  | 4.799910  | -2.430589 | -1.054607 |
| 1  | 3.022889  | -2.867511 | -2.205085 |

|    |           |           |           |
|----|-----------|-----------|-----------|
| 1  | 6.398912  | -1.776657 | 0.227343  |
| 1  | 5.371571  | -3.251157 | -1.478252 |
| 6  | 1.398912  | -0.925517 | -1.228750 |
| 7  | 0.271750  | -0.685380 | -1.363335 |
| 6  | -4.049786 | -1.437373 | 0.658312  |
| 6  | -3.280060 | -2.595817 | 0.052441  |
| 8  | -2.134243 | -2.327978 | -0.495076 |
| 8  | -3.765597 | -3.722961 | 0.081783  |
| 1  | -4.312037 | -1.697011 | 1.692299  |
| 7  | -3.282006 | -0.200852 | 0.601839  |
| 6  | -3.641043 | 0.857031  | 1.275096  |
| 8  | -3.029522 | 1.965879  | 1.268848  |
| 1  | -2.373517 | 1.897321  | -2.198445 |
| 8  | 2.655013  | 0.768126  | 0.509982  |
| 8  | 2.422751  | 0.823236  | 3.010159  |
| 16 | 1.656300  | 0.547505  | 1.806879  |
| 1  | -4.552701 | 0.772050  | 1.887611  |
| 1  | -4.989770 | -1.341541 | 0.097472  |

-----  
 ---  
*ortho-D*  
 -----  
 ---

Number of imaginary frequencies : 1  
 The smallest frequency is : -1686.2087 cm(-1)

Electronic energy : =-1970.1761744  
 Zero-point correction= 0.349971  
 Thermal correction to Energy= 0.379842  
 Thermal correction to Enthalpy= 0.380786  
 Thermal correction to Gibbs Free Energy= 0.288610  
 Sum of electronic and zero-point Energies= -1969.826204  
 Sum of electronic and thermal Energies= -1969.796333  
 Sum of electronic and thermal Enthalpies= -1969.795388  
 Sum of electronic and thermal Free Energies= -1969.887564

.....  
 Cartesian Coordinates  
 .....

|    |           |           |          |
|----|-----------|-----------|----------|
| 46 | -1.304278 | -0.969558 | 0.138490 |
| 6  | -0.508753 | 0.648276  | 1.325419 |
| 1  | -1.484065 | 1.415223  | 1.030729 |
| 6  | -0.587348 | 0.188398  | 2.660797 |
| 6  | 0.494736  | 0.274622  | 3.523685 |
| 6  | 1.671808  | 0.862555  | 3.069986 |
| 6  | 1.777825  | 1.365873  | 1.770488 |
| 6  | 0.716315  | 1.232946  | 0.886531 |
| 1  | -1.526910 | -0.238254 | 3.012907 |
| 1  | 0.423573  | -0.097143 | 4.542501 |

|    |           |           |           |
|----|-----------|-----------|-----------|
| 1  | 2.524580  | 0.949264  | 3.739526  |
| 1  | 2.701315  | 1.851355  | 1.464481  |
| 6  | 0.748929  | 1.785848  | -0.510942 |
| 1  | 0.556456  | 2.870574  | -0.519701 |
| 1  | -0.004066 | 1.312182  | -1.153948 |
| 8  | 3.390903  | 2.264892  | -0.727457 |
| 6  | 3.524620  | -0.601390 | -0.761807 |
| 6  | 3.126146  | -1.600425 | 0.143501  |
| 6  | 4.865582  | -0.338718 | -0.973715 |
| 6  | 4.082364  | -2.340243 | 0.843749  |
| 6  | 5.810139  | -1.074409 | -0.261814 |
| 1  | 5.166624  | 0.420737  | -1.689121 |
| 6  | 5.426475  | -2.067302 | 0.637501  |
| 1  | 3.759986  | -3.113238 | 1.535135  |
| 1  | 6.865630  | -0.871847 | -0.423769 |
| 1  | 6.180562  | -2.633925 | 1.175824  |
| 6  | 1.728605  | -1.767457 | 0.302626  |
| 7  | 0.570952  | -1.767648 | 0.348617  |
| 8  | -2.295741 | 2.516698  | 1.035398  |
| 6  | -2.591825 | 2.991503  | -0.120531 |
| 6  | -2.819716 | 4.476391  | -0.175629 |
| 8  | -2.676434 | 2.300346  | -1.157143 |
| 6  | -3.758771 | -1.031929 | -1.410496 |
| 6  | -3.158938 | -2.421907 | -1.498773 |
| 8  | -2.031898 | -2.612426 | -0.882546 |
| 8  | -3.714314 | -3.284413 | -2.168431 |
| 1  | -4.848878 | -1.100849 | -1.343677 |
| 1  | -3.504297 | -0.494595 | -2.331605 |
| 1  | -3.444546 | 4.797728  | 0.663425  |
| 1  | -1.854150 | 4.986523  | -0.072681 |
| 1  | -3.278442 | 4.772037  | -1.122006 |
| 7  | -3.226787 | -0.238676 | -0.285065 |
| 1  | -3.048162 | 0.761396  | -0.553164 |
| 6  | -3.890405 | -0.398406 | 0.954918  |
| 8  | -4.603922 | -1.341844 | 1.197998  |
| 8  | 2.517728  | 0.020047  | -1.480546 |
| 8  | 1.995596  | 2.017469  | -2.806992 |
| 16 | 2.279449  | 1.654983  | -1.433870 |
| 1  | -3.670822 | 0.425529  | 1.656411  |

-----  
---  
*ortho-E*  
-----  
---

Number of imaginary frequencies : 1  
The smallest frequency is : -1649.8461 cm(-1)



Electronic energy :       =-1801.5775047  
 Zero-point correction=               0.322065  
 Thermal correction to Energy=       0.349606  
 Thermal correction to Enthalpy=     0.350550  
 Thermal correction to Gibbs Free Energy=   0.262971  
 Sum of electronic and zero-point Energies=   -1801.255440  
 Sum of electronic and thermal Energies=   -1801.227898  
 Sum of electronic and thermal Enthalpies=   -1801.226954  
 Sum of electronic and thermal Free Energies=   -1801.314534

.....  
 Cartesian Coordinates  
 .....

|    |           |           |           |
|----|-----------|-----------|-----------|
| 46 | 1.986811  | 0.807206  | 0.196631  |
| 6  | 1.772396  | -1.189268 | 0.868935  |
| 1  | 2.672734  | -1.363897 | -0.029060 |
| 8  | 3.607102  | -1.655054 | -0.956035 |
| 8  | 3.549593  | 0.578533  | -1.110977 |
| 6  | 2.230092  | -1.270341 | 2.199161  |
| 6  | 1.477063  | -1.909044 | 3.174074  |
| 6  | 0.256423  | -2.486577 | 2.827094  |
| 6  | -0.204920 | -2.443168 | 1.513282  |
| 6  | 0.536736  | -1.791927 | 0.532455  |
| 1  | 3.192411  | -0.829861 | 2.455178  |
| 1  | 1.835967  | -1.964659 | 4.198795  |
| 1  | -0.338847 | -2.990334 | 3.585232  |
| 1  | -1.146952 | -2.923253 | 1.249135  |
| 6  | 0.053709  | -1.816167 | -0.884514 |
| 1  | 0.881185  | -1.773521 | -1.606180 |
| 1  | -0.551364 | -2.707286 | -1.091434 |
| 8  | -1.943691 | -0.958609 | -2.420585 |
| 6  | -3.152210 | 0.226654  | -0.116775 |
| 6  | -4.221793 | -0.676167 | -0.137264 |
| 6  | -3.356423 | 1.592780  | -0.166901 |
| 6  | -5.528690 | -0.185210 | -0.197338 |
| 6  | -4.663850 | 2.068832  | -0.231669 |
| 1  | -2.497985 | 2.260907  | -0.147752 |
| 6  | -5.741775 | 1.186463  | -0.244774 |
| 1  | -6.361375 | -0.882949 | -0.210118 |
| 1  | -4.839872 | 3.140621  | -0.269338 |
| 1  | -6.757008 | 1.570112  | -0.292632 |
| 6  | -3.936735 | -2.073666 | -0.103762 |
| 7  | -3.671308 | -3.206081 | -0.074155 |
| 6  | 4.014428  | -0.558960 | -1.428839 |
| 6  | 5.121214  | -0.592164 | -2.436992 |
| 1  | 5.981845  | -1.112243 | -2.004859 |
| 1  | 4.791716  | -1.170387 | -3.306373 |
| 1  | 5.409128  | 0.412922  | -2.748604 |
| 6  | -0.263982 | 3.806510  | 1.507050  |

|    |           |           |           |
|----|-----------|-----------|-----------|
| 6  | 0.599037  | 2.716844  | 0.986092  |
| 8  | 1.517281  | 2.949313  | 0.142687  |
| 8  | 0.440606  | 1.514004  | 1.399204  |
| 1  | 0.336669  | 4.454161  | 2.155990  |
| 1  | -1.102408 | 3.403698  | 2.080186  |
| 1  | -0.628721 | 4.420025  | 0.677277  |
| 8  | -1.869769 | -0.289612 | 0.000678  |
| 8  | -0.309711 | 0.770179  | -1.649269 |
| 16 | -1.027929 | -0.470970 | -1.401432 |

-----  
---  
*ortho-F*  
-----  
---

Number of imaginary frequencies : 1  
The smallest frequency is : -1634.2989 cm(-1)

Electronic energy :       =-1970.188653  
Zero-point correction=               0.349342  
Thermal correction to Energy=       0.380182  
Thermal correction to Enthalpy=     0.381126  
Thermal correction to Gibbs Free Energy=   0.283951  
Sum of electronic and zero-point Energies=   -1969.839311  
Sum of electronic and thermal Energies=   -1969.808471  
Sum of electronic and thermal Enthalpies=   -1969.807527  
Sum of electronic and thermal Free Energies=   -1969.904702

.....  
Cartesian Coordinates  
.....

|    |           |           |           |
|----|-----------|-----------|-----------|
| 46 | 0.998899  | 0.787369  | 0.161787  |
| 6  | 0.121846  | -0.659929 | 1.505920  |
| 1  | 1.223440  | -1.246523 | 1.162975  |
| 6  | 0.122035  | -0.107193 | 2.800272  |
| 6  | -0.959484 | -0.275929 | 3.653136  |
| 6  | -2.045232 | -1.036989 | 3.228754  |
| 6  | -2.055993 | -1.631636 | 1.967069  |
| 6  | -0.997372 | -1.422761 | 1.088829  |
| 1  | 0.990013  | 0.464790  | 3.127015  |
| 1  | -0.955255 | 0.168549  | 4.645181  |
| 1  | -2.892098 | -1.190147 | 3.893770  |
| 1  | -2.899232 | -2.253152 | 1.676568  |
| 6  | -0.931525 | -2.088240 | -0.256785 |
| 1  | -0.705773 | -3.161770 | -0.167017 |
| 1  | -0.159497 | -1.640524 | -0.896192 |
| 8  | -3.563951 | -2.601909 | -0.538204 |
| 6  | -3.717193 | 0.210552  | -1.017102 |

|    |           |           |           |
|----|-----------|-----------|-----------|
| 6  | -3.405401 | 1.329883  | -0.226441 |
| 6  | -5.032526 | -0.098766 | -1.311407 |
| 6  | -4.423584 | 2.147178  | 0.271468  |
| 6  | -6.039906 | 0.715291  | -0.799004 |
| 1  | -5.264374 | -0.955844 | -1.936796 |
| 6  | -5.742272 | 1.829913  | -0.017505 |
| 1  | -4.168240 | 3.013483  | 0.874784  |
| 1  | -7.075736 | 0.477034  | -1.026126 |
| 1  | -6.542986 | 2.456499  | 0.364291  |
| 6  | -2.027059 | 1.539597  | 0.025986  |
| 7  | -0.876102 | 1.563430  | 0.155114  |
| 6  | 2.853578  | 4.299518  | -1.374764 |
| 6  | 2.334831  | 3.201952  | -0.478977 |
| 8  | 1.678884  | 2.282675  | -1.113173 |
| 8  | 2.528142  | 3.216726  | 0.740765  |
| 1  | 3.437849  | 3.874761  | -2.197331 |
| 1  | 3.469800  | 5.000239  | -0.806150 |
| 6  | 4.507649  | -1.749827 | 0.078664  |
| 6  | 3.133664  | -1.200429 | 0.344698  |
| 8  | 2.894992  | -0.008221 | -0.003143 |
| 8  | 2.314942  | -1.972143 | 0.907435  |
| 1  | 4.390211  | -2.684244 | -0.486081 |
| 1  | 4.943057  | -2.029831 | 1.048485  |
| 7  | 5.345649  | -0.816682 | -0.629903 |
| 1  | 4.992367  | 0.116174  | -0.807550 |
| 6  | 6.578943  | -1.162168 | -1.034949 |
| 8  | 7.083623  | -2.263845 | -0.845973 |
| 1  | 2.010630  | 4.838177  | -1.821429 |
| 8  | -2.647317 | -0.485569 | -1.552629 |
| 8  | -2.059418 | -2.651289 | -2.554076 |
| 16 | -2.413728 | -2.095192 | -1.263666 |
| 1  | 7.100114  | -0.342330 | -1.563622 |

---

*para-A*

---

Number of imaginary frequencies : 1

The smallest frequency is : -1503.9278 cm(-1)

Electronic energy : =-1801.5866397

Zero-point correction= 0.322406

Thermal correction to Energy= 0.349857

Thermal correction to Enthalpy= 0.350801

Thermal correction to Gibbs Free Energy= 0.263659

Sum of electronic and zero-point Energies= -1801.264234

Sum of electronic and thermal Energies= -1801.236783

Sum of electronic and thermal Enthalpies= -1801.235839

Sum of electronic and thermal Free Energies= -1801.322981

.....  
Cartesian Coordinates  
.....

|    |           |           |           |
|----|-----------|-----------|-----------|
| 46 | 2.133131  | 0.221566  | -0.157693 |
| 6  | 0.747756  | -2.046326 | 1.130428  |
| 6  | 1.396146  | -1.801447 | -0.094527 |
| 6  | 0.710450  | -2.091431 | -1.289753 |
| 6  | -0.603278 | -2.531639 | -1.262610 |
| 6  | -1.251456 | -2.704057 | -0.035949 |
| 6  | -0.559357 | -2.507872 | 1.163574  |
| 1  | -1.151895 | -2.704749 | -2.187326 |
| 1  | 1.204062  | -1.925066 | -2.246523 |
| 1  | 2.700261  | -2.042237 | -0.102133 |
| 1  | -1.065767 | -2.670532 | 2.113482  |
| 6  | -2.715083 | -3.000288 | -0.016839 |
| 8  | -3.240961 | -0.963212 | 1.676796  |
| 6  | -3.372843 | 0.801690  | -0.568110 |
| 6  | -2.255765 | 1.609936  | -0.317576 |
| 6  | -4.644091 | 1.345693  | -0.612619 |
| 6  | -2.426272 | 2.983658  | -0.101017 |
| 6  | -4.801494 | 2.711719  | -0.391556 |
| 1  | -5.495645 | 0.704276  | -0.823666 |
| 6  | -3.701908 | 3.526611  | -0.133533 |
| 1  | -1.551091 | 3.596699  | 0.100965  |
| 1  | -5.798869 | 3.142011  | -0.424159 |
| 1  | -3.839060 | 4.590014  | 0.039855  |
| 6  | -0.940937 | 1.072220  | -0.294063 |
| 7  | 0.162175  | 0.721643  | -0.283435 |
| 8  | -3.170933 | -0.553319 | -0.792728 |
| 8  | -5.093412 | -1.832043 | 0.227231  |
| 16 | -3.680964 | -1.554272 | 0.424368  |
| 1  | -3.005743 | -3.736806 | 0.743695  |
| 1  | -3.106211 | -3.325569 | -0.987280 |
| 8  | 4.145029  | -0.135128 | -0.024144 |
| 8  | 2.674781  | 2.219970  | -0.370659 |
| 6  | 4.630747  | -1.305535 | -0.038148 |
| 6  | 6.119858  | -1.438513 | -0.000061 |
| 1  | 6.605000  | -0.468158 | 0.115219  |
| 1  | 6.401506  | -2.101989 | 0.823236  |
| 1  | 6.454229  | -1.910986 | -0.929760 |
| 6  | 2.184647  | 3.045198  | 0.498443  |
| 6  | 2.510468  | 4.489021  | 0.196358  |
| 1  | 1.950222  | 4.806832  | -0.690679 |
| 1  | 2.238495  | 5.129548  | 1.039032  |
| 1  | 3.574227  | 4.607160  | -0.031904 |
| 8  | 3.944717  | -2.366105 | -0.088846 |
| 8  | 1.501392  | 2.733142  | 1.477058  |
| 1  | 1.271997  | -1.843914 | 2.063661  |

---  
*para-B*  
---

Number of imaginary frequencies : 1  
The smallest frequency is : -1559.4469 cm(-1)

Electronic energy : =-1970.2012183  
Zero-point correction= 0.350764  
Thermal correction to Energy= 0.380911  
Thermal correction to Enthalpy= 0.381855  
Thermal correction to Gibbs Free Energy= 0.287701  
Sum of electronic and zero-point Energies= -1969.850454  
Sum of electronic and thermal Energies= -1969.820307  
Sum of electronic and thermal Enthalpies= -1969.819363  
Sum of electronic and thermal Free Energies= -1969.913517

.....  
Cartesian Coordinates  
.....

|    |           |           |           |
|----|-----------|-----------|-----------|
| 6  | -1.268630 | -2.696212 | -1.253757 |
| 6  | 0.078423  | -2.411937 | -1.404804 |
| 6  | 0.914569  | -2.290713 | -0.278261 |
| 6  | 0.372355  | -2.532912 | 0.998096  |
| 6  | -0.975526 | -2.816449 | 1.153891  |
| 6  | -1.804192 | -2.853990 | 0.028397  |
| 1  | -1.926939 | -2.748083 | -2.119463 |
| 1  | 0.488931  | -2.244280 | -2.399540 |
| 1  | 2.153130  | -2.716884 | -0.436145 |
| 1  | -1.399781 | -2.969980 | 2.144583  |
| 6  | -3.285340 | -2.938900 | 0.195799  |
| 8  | -3.342500 | -0.782865 | 1.826007  |
| 6  | -3.453569 | 0.880220  | -0.580114 |
| 6  | -2.248655 | 1.587034  | -0.448495 |
| 6  | -4.660381 | 1.549232  | -0.680017 |
| 6  | -2.267841 | 2.988254  | -0.427630 |
| 6  | -4.667560 | 2.941312  | -0.644773 |
| 1  | -5.579502 | 0.981718  | -0.796918 |
| 6  | -3.479941 | 3.656589  | -0.522246 |
| 1  | -1.325521 | 3.526006  | -0.332188 |
| 1  | -5.614759 | 3.468531  | -0.723681 |
| 1  | -3.496339 | 4.742566  | -0.503015 |
| 6  | -0.996677 | 0.916727  | -0.350155 |
| 7  | 0.052419  | 0.428870  | -0.283060 |
| 46 | 1.926789  | -0.403754 | -0.217895 |
| 6  | 5.627034  | -2.635303 | -0.314748 |

|    |           |           |           |
|----|-----------|-----------|-----------|
| 6  | 4.172583  | -2.286844 | -0.324061 |
| 8  | 3.341822  | -3.218756 | -0.516355 |
| 8  | 3.860377  | -1.070514 | -0.146281 |
| 1  | 1.016025  | -2.466704 | 1.874407  |
| 1  | 6.241555  | -1.775643 | -0.043374 |
| 1  | 5.797428  | -3.459084 | 0.384834  |
| 1  | 5.909136  | -2.988439 | -1.312425 |
| 8  | -5.424074 | -1.394287 | 0.569576  |
| 8  | -3.407397 | -0.503886 | -0.663897 |
| 16 | -3.973595 | -1.342631 | 0.642720  |
| 1  | -3.599521 | -3.595217 | 1.017276  |
| 1  | -3.814594 | -3.236116 | -0.716935 |
| 6  | 3.232664  | 3.460070  | 1.112327  |
| 6  | 2.755533  | 2.012986  | 1.013095  |
| 8  | 2.466286  | 1.418574  | 2.055285  |
| 8  | 2.736445  | 1.523052  | -0.174396 |
| 1  | 4.309349  | 3.450417  | 1.308265  |
| 7  | 2.984017  | 4.255838  | -0.066005 |
| 1  | 3.754336  | 4.575480  | -0.638433 |
| 6  | 1.728780  | 4.446160  | -0.498794 |
| 8  | 0.734413  | 4.019317  | 0.084899  |
| 1  | 1.670483  | 5.036301  | -1.431509 |
| 1  | 2.741998  | 3.904200  | 1.986154  |

-----  
---  
*para-C*  
-----  
---

Number of imaginary frequencies : 1  
The smallest frequency is : -1564.5696 cm(-1)

Electronic energy :        =-1741.2137093  
Zero-point correction=                0.287154  
Thermal correction to Energy=        0.311158  
Thermal correction to Enthalpy=       0.312102  
Thermal correction to Gibbs Free Energy=   0.232929  
Sum of electronic and zero-point Energies=   -1740.926555  
Sum of electronic and thermal Energies=   -1740.902552  
Sum of electronic and thermal Enthalpies=   -1740.901607  
Sum of electronic and thermal Free Energies=   -1740.980780

-----  
                  Cartesian Coordinates  
-----

|    |          |           |           |
|----|----------|-----------|-----------|
| 46 | 2.144041 | 0.169126  | -0.024077 |
| 6  | 0.691577 | -2.173119 | 0.970368  |
| 6  | 1.290251 | -1.795728 | -0.247476 |

|    |           |           |           |
|----|-----------|-----------|-----------|
| 6  | 0.518262  | -1.858996 | -1.423365 |
| 6  | -0.820022 | -2.215785 | -1.375235 |
| 6  | -1.411178 | -2.521907 | -0.145493 |
| 6  | -0.644983 | -2.538827 | 1.023360  |
| 1  | -1.428057 | -2.221971 | -2.278646 |
| 1  | 0.970367  | -1.589401 | -2.377046 |
| 1  | 2.558842  | -2.155557 | -0.377381 |
| 1  | -1.110883 | -2.803048 | 1.971237  |
| 6  | -2.888713 | -2.723412 | -0.068837 |
| 8  | -3.173755 | -0.732251 | 1.737948  |
| 6  | -3.331336 | 1.127692  | -0.483385 |
| 6  | -2.190896 | 1.890894  | -0.192614 |
| 6  | -4.577290 | 1.721930  | -0.581385 |
| 6  | -2.316868 | 3.273617  | -0.002928 |
| 6  | -4.688667 | 3.095446  | -0.382187 |
| 1  | -5.443369 | 1.111013  | -0.821542 |
| 6  | -3.566536 | 3.867692  | -0.094783 |
| 1  | -1.429732 | 3.861602  | 0.216414  |
| 1  | -5.665423 | 3.565444  | -0.460645 |
| 1  | -3.664157 | 4.939128  | 0.054197  |
| 6  | -0.901313 | 1.295915  | -0.106195 |
| 7  | 0.177666  | 0.877532  | -0.040646 |
| 6  | 4.992806  | 0.756036  | 0.222682  |
| 6  | 4.261179  | 2.081481  | 0.315280  |
| 8  | 2.967346  | 2.055544  | 0.227085  |
| 8  | 4.906618  | 3.113521  | 0.476883  |
| 1  | 5.537491  | 0.614201  | 1.166051  |
| 7  | 4.071642  | -0.347433 | -0.019838 |
| 6  | 4.510105  | -1.553486 | -0.248677 |
| 8  | 3.780723  | -2.566843 | -0.466134 |
| 1  | 1.282639  | -2.155912 | 1.885338  |
| 8  | -3.180713 | -0.232071 | -0.715616 |
| 8  | -5.156322 | -1.388398 | 0.350975  |
| 1  | -3.193380 | -3.476480 | 0.669273  |
| 1  | -3.350139 | -2.966960 | -1.032872 |
| 16 | -3.717922 | -1.232492 | 0.486405  |
| 1  | 5.601671  | -1.698723 | -0.252178 |
| 1  | 5.740421  | 0.833367  | -0.577650 |

-----  
---  
*para-D*  
-----  
---

Number of imaginary frequencies : 1  
The smallest frequency is : -1792.4581 cm(-1)

Electronic energy :       =-1970.1822633  
 Zero-point correction=           0.350578  
 Thermal correction to Energy=       0.380374  
 Thermal correction to Enthalpy=     0.381318  
 Thermal correction to Gibbs Free Energy=   0.288608  
 Sum of electronic and zero-point Energies=   -1969.831686  
 Sum of electronic and thermal Energies=   -1969.801889  
 Sum of electronic and thermal Enthalpies=   -1969.800945  
 Sum of electronic and thermal Free Energies=   -1969.893656

.....  
 Cartesian Coordinates  
 .....

|    |           |           |           |
|----|-----------|-----------|-----------|
| 46 | 1.511014  | 0.696233  | 0.082525  |
| 6  | 0.455165  | -1.698569 | 1.315435  |
| 6  | 1.092581  | -1.411618 | 0.085455  |
| 6  | 0.402134  | -1.718672 | -1.110445 |
| 6  | -0.875783 | -2.249344 | -1.078144 |
| 6  | -1.495105 | -2.487223 | 0.154493  |
| 6  | -0.816808 | -2.243597 | 1.353919  |
| 1  | 0.978426  | -1.480826 | 2.246876  |
| 8  | 3.432900  | -2.531622 | 0.137979  |
| 1  | -1.418075 | -2.458311 | -1.998814 |
| 1  | 0.882633  | -1.517682 | -2.067983 |
| 1  | 2.332962  | -1.798686 | 0.085913  |
| 1  | -1.300810 | -2.459515 | 2.304629  |
| 6  | -2.919135 | -2.938819 | 0.186533  |
| 8  | -3.660392 | -0.859435 | 1.742962  |
| 6  | -3.986865 | 0.701048  | -0.654068 |
| 6  | -2.987349 | 1.644220  | -0.375075 |
| 6  | -5.295332 | 1.095508  | -0.865206 |
| 6  | -3.316558 | 3.004785  | -0.316782 |
| 6  | -5.611309 | 2.450082  | -0.794909 |
| 1  | -6.050694 | 0.347682  | -1.090249 |
| 6  | -4.629682 | 3.399548  | -0.523479 |
| 1  | -2.536288 | 3.731698  | -0.109140 |
| 1  | -6.638571 | 2.763882  | -0.960303 |
| 1  | -4.887469 | 4.453570  | -0.477079 |
| 6  | -1.639310 | 1.245732  | -0.166893 |
| 7  | -0.524747 | 0.976011  | -0.003263 |
| 6  | 5.029074  | -3.589478 | -1.245875 |
| 6  | 4.147500  | -2.415622 | -0.926563 |
| 8  | 4.132224  | -1.408431 | -1.661738 |
| 6  | 4.061541  | 1.958102  | -0.402311 |
| 6  | 3.090307  | 3.083591  | -0.097253 |
| 8  | 1.858997  | 2.741612  | 0.130592  |
| 8  | 3.474620  | 4.246672  | -0.128058 |
| 1  | 5.051147  | 2.193452  | 0.000897  |
| 1  | 4.405446  | -4.459148 | -1.481988 |
| 1  | 5.683305  | -3.370607 | -2.092824 |



|    |           |           |           |
|----|-----------|-----------|-----------|
| 1  | 5.629937  | -3.855117 | -0.369785 |
| 7  | 3.597540  | 0.652109  | 0.105696  |
| 1  | 3.836061  | -0.144105 | -0.532044 |
| 6  | 3.856030  | 0.400153  | 1.476547  |
| 8  | 4.144334  | 1.277322  | 2.254699  |
| 16 | -4.037372 | -1.584357 | 0.541180  |
| 8  | -3.629895 | -0.636748 | -0.750569 |
| 8  | -5.410566 | -2.026812 | 0.375854  |
| 1  | -3.126546 | -3.662337 | 0.985447  |
| 1  | -3.266375 | -3.356850 | -0.765158 |
| 1  | 3.758481  | -0.669021 | 1.734767  |
| 1  | 4.143843  | 1.868675  | -1.491275 |

-----  
 ---  
*para-E*  
 -----  
 ---

Number of imaginary frequencies : 1  
 The smallest frequency is : -1631.1391 cm(-1)

Electronic energy : =-1801.5712219  
 Zero-point correction= 0.321664  
 Thermal correction to Energy= 0.349635  
 Thermal correction to Enthalpy= 0.350579  
 Thermal correction to Gibbs Free Energy= 0.258429  
 Sum of electronic and zero-point Energies= -1801.249558  
 Sum of electronic and thermal Energies= -1801.221587  
 Sum of electronic and thermal Enthalpies= -1801.220643  
 Sum of electronic and thermal Free Energies= -1801.312793

.....  
 Cartesian Coordinates  
 .....

|    |           |           |           |
|----|-----------|-----------|-----------|
| 46 | -3.761566 | 0.371103  | -0.163254 |
| 6  | -0.069421 | -0.304730 | 1.509030  |
| 1  | 0.328273  | -0.276624 | 2.522284  |
| 8  | -3.451741 | -2.767082 | -0.374250 |
| 8  | -5.054981 | -1.218505 | -0.172717 |
| 6  | -1.400566 | -0.615584 | 1.278355  |
| 6  | -1.909026 | -0.654796 | -0.034858 |
| 6  | -1.044599 | -0.375682 | -1.112218 |
| 6  | 0.288546  | -0.076579 | -0.882444 |
| 6  | 0.773970  | -0.026662 | 0.428726  |
| 1  | -2.056920 | -0.848379 | 2.115338  |
| 1  | -2.707367 | -1.628041 | -0.243394 |
| 1  | -1.425594 | -0.410201 | -2.131312 |
| 1  | 0.963634  | 0.128658  | -1.711732 |

|    |           |           |           |
|----|-----------|-----------|-----------|
| 6  | 2.218667  | 0.276834  | 0.673388  |
| 1  | 2.392070  | 0.812940  | 1.613891  |
| 1  | 2.673860  | 0.826357  | -0.159992 |
| 8  | 3.092931  | -1.970541 | -0.450618 |
| 6  | 5.436914  | -0.265801 | -0.004529 |
| 6  | 5.756927  | 1.097816  | -0.068306 |
| 6  | 5.947899  | -1.162513 | -0.927821 |
| 6  | 6.597658  | 1.558759  | -1.087211 |
| 6  | 6.774844  | -0.686656 | -1.941173 |
| 1  | 5.706264  | -2.217630 | -0.844977 |
| 6  | 7.098835  | 0.665139  | -2.022449 |
| 1  | 6.848475  | 2.615204  | -1.129336 |
| 1  | 7.177089  | -1.386616 | -2.668946 |
| 1  | 7.750900  | 1.023350  | -2.814086 |
| 6  | 5.232979  | 2.003463  | 0.901623  |
| 7  | 4.797908  | 2.743887  | 1.686224  |
| 6  | -4.658715 | -2.420102 | -0.292905 |
| 6  | -5.711924 | -3.484170 | -0.344683 |
| 1  | -5.638216 | -4.005829 | -1.304554 |
| 1  | -5.519379 | -4.219206 | 0.442747  |
| 1  | -6.712077 | -3.064088 | -0.228345 |
| 6  | -4.120672 | 4.316295  | -0.073744 |
| 6  | -4.034731 | 2.837629  | -0.151187 |
| 8  | -2.890138 | 2.260338  | -0.138805 |
| 8  | -5.073106 | 2.109813  | -0.199522 |
| 1  | -4.081073 | 4.615149  | 0.980439  |
| 1  | -5.065002 | 4.668028  | -0.496575 |
| 1  | -3.273746 | 4.778401  | -0.588049 |
| 16 | 3.137748  | -1.255660 | 0.811856  |
| 8  | 2.814233  | -1.928722 | 2.053533  |
| 8  | 4.664802  | -0.697157 | 1.067059  |

-----  
---  
*para-F*  
-----  
---

Number of imaginary frequencies : 1  
The smallest frequency is : -1405.8683 cm(-1)

Electronic energy : =-1970.1961453  
Zero-point correction= 0.350818  
Thermal correction to Energy= 0.380979  
Thermal correction to Enthalpy= 0.381923  
Thermal correction to Gibbs Free Energy= 0.287624  
Sum of electronic and zero-point Energies= -1969.845328  
Sum of electronic and thermal Energies= -1969.815166

Sum of electronic and thermal Enthalpies= -1969.814222  
Sum of electronic and thermal Free Energies= -1969.908521

.....  
Cartesian Coordinates  
.....

|    |           |           |           |
|----|-----------|-----------|-----------|
| 6  | -0.881144 | -2.486704 | -0.940633 |
| 6  | 0.332361  | -1.826182 | -1.043866 |
| 6  | 0.984172  | -1.341124 | 0.105838  |
| 6  | 0.421024  | -1.609891 | 1.367556  |
| 6  | -0.785860 | -2.282436 | 1.476626  |
| 6  | -1.460906 | -2.676412 | 0.317461  |
| 1  | -1.414538 | -2.813821 | -1.831960 |
| 1  | 0.766277  | -1.643376 | -2.026070 |
| 1  | 2.317353  | -1.410158 | 0.093121  |
| 1  | -1.234845 | -2.462807 | 2.451863  |
| 6  | -2.861764 | -3.182005 | 0.411763  |
| 8  | -3.667310 | -0.997893 | 1.788661  |
| 6  | -4.065161 | 0.334252  | -0.770798 |
| 6  | -3.135272 | 1.374049  | -0.621309 |
| 6  | -5.398358 | 0.605437  | -1.022238 |
| 6  | -3.566567 | 2.703587  | -0.728235 |
| 6  | -5.814139 | 1.930765  | -1.117158 |
| 1  | -6.097127 | -0.216097 | -1.153257 |
| 6  | -4.904724 | 2.974726  | -0.970481 |
| 1  | -2.841182 | 3.505276  | -0.618563 |
| 1  | -6.860736 | 2.146044  | -1.315764 |
| 1  | -5.237659 | 4.005468  | -1.050483 |
| 6  | -1.755576 | 1.112444  | -0.391888 |
| 7  | -0.616593 | 0.975037  | -0.228329 |
| 46 | 1.411936  | 0.752030  | -0.062713 |
| 8  | 3.463882  | 0.683501  | 0.060602  |
| 6  | 4.098093  | -0.407501 | 0.117032  |
| 8  | 3.581219  | -1.554592 | 0.142590  |
| 6  | 5.606591  | -0.268066 | 0.156048  |
| 1  | 5.865788  | 0.302587  | 1.052841  |
| 6  | 6.397808  | -2.256327 | -0.978715 |
| 8  | 5.945367  | -1.913677 | -2.063617 |
| 7  | 6.318194  | -1.514588 | 0.144983  |
| 8  | -3.616217 | -0.976529 | -0.714456 |
| 16 | -4.015239 | -1.827433 | 0.646893  |
| 8  | -5.378376 | -2.311646 | 0.509767  |
| 1  | -3.205674 | -3.700438 | -0.490367 |
| 1  | -3.043179 | -3.826484 | 1.281172  |
| 1  | 0.926967  | -1.258003 | 2.265967  |
| 1  | 6.638431  | -1.914970 | 1.017502  |
| 8  | 1.633981  | 2.815530  | -0.273171 |
| 6  | 1.840334  | 3.410968  | 0.856506  |
| 8  | 1.849180  | 2.855564  | 1.960063  |
| 6  | 2.104320  | 4.890739  | 0.720126  |

|   |          |           |           |
|---|----------|-----------|-----------|
| 1 | 3.117292 | 5.039030  | 0.328339  |
| 1 | 1.409917 | 5.347164  | 0.008326  |
| 1 | 2.025169 | 5.387173  | 1.690532  |
| 1 | 6.933136 | -3.211360 | -0.822421 |
| 1 | 5.892970 | 0.343180  | -0.708149 |

-----  
---  
*para-H*  
-----  
---

Number of imaginary frequencies : 1  
The smallest frequency is : -1682.9780 cm(-1)

Electronic energy : =-1970.1847835  
Zero-point correction= 0.350336  
Thermal correction to Energy= 0.380612  
Thermal correction to Enthalpy= 0.381556  
Thermal correction to Gibbs Free Energy= 0.285308  
Sum of electronic and zero-point Energies= -1969.834447  
Sum of electronic and thermal Energies= -1969.804171  
Sum of electronic and thermal Enthalpies= -1969.803227  
Sum of electronic and thermal Free Energies= -1969.899475

.....  
Cartesian Coordinates  
.....

|    |           |           |           |
|----|-----------|-----------|-----------|
| 46 | 3.397133  | 0.034703  | -0.007912 |
| 6  | -0.365586 | -0.569656 | -1.543553 |
| 1  | -0.794547 | -0.561779 | -2.544459 |
| 8  | 2.998379  | -3.077377 | 0.296469  |
| 8  | 4.657845  | -1.594098 | 0.065756  |
| 6  | 0.958154  | -0.925858 | -1.339811 |
| 6  | 1.507383  | -0.937381 | -0.041929 |
| 6  | 0.686766  | -0.585271 | 1.047783  |
| 6  | -0.638737 | -0.235501 | 0.847128  |
| 6  | -1.160611 | -0.210776 | -0.450463 |
| 1  | 1.579311  | -1.210797 | -2.187924 |
| 1  | 2.285682  | -1.944927 | 0.165747  |
| 1  | 1.098238  | -0.592180 | 2.055639  |
| 1  | -1.276776 | 0.033317  | 1.687530  |
| 6  | -2.595311 | 0.153823  | -0.668434 |
| 1  | -2.774672 | 0.613878  | -1.647321 |
| 1  | -2.989494 | 0.801268  | 0.124658  |
| 8  | -3.589465 | -1.895775 | 0.705066  |
| 6  | -5.857692 | -0.174655 | 0.068356  |
| 6  | -6.119146 | 1.201361  | 0.018718  |
| 6  | -6.417911 | -0.973717 | 1.050970  |

|    |           |           |           |
|----|-----------|-----------|-----------|
| 6  | -6.953376 | 1.776140  | 0.983957  |
| 6  | -7.237183 | -0.385669 | 2.009963  |
| 1  | -6.215535 | -2.040564 | 1.055898  |
| 6  | -7.504480 | 0.980822  | 1.978247  |
| 1  | -7.159337 | 2.842100  | 0.939511  |
| 1  | -7.678290 | -1.007611 | 2.784413  |
| 1  | -8.151815 | 1.427397  | 2.727745  |
| 6  | -5.545799 | 2.001914  | -1.013488 |
| 7  | -5.073263 | 2.657331  | -1.850347 |
| 6  | 4.218926  | -2.777974 | 0.207867  |
| 6  | 5.227149  | -3.882519 | 0.276440  |
| 1  | 5.115604  | -4.405080 | 1.232029  |
| 1  | 5.020406  | -4.606241 | -0.518039 |
| 1  | 6.244901  | -3.501717 | 0.178376  |
| 6  | 4.526003  | 2.650413  | -0.686614 |
| 6  | 3.040404  | 2.832979  | -0.417550 |
| 8  | 2.345090  | 1.778104  | -0.111353 |
| 8  | 2.542406  | 3.944501  | -0.546966 |
| 1  | 5.069871  | 3.531599  | -0.332345 |
| 1  | 4.660245  | 2.573179  | -1.770292 |
| 7  | 5.075282  | 1.424341  | -0.083787 |
| 1  | 5.787241  | 0.948587  | -0.640273 |
| 6  | 5.406648  | 1.485044  | 1.282554  |
| 8  | 5.004059  | 2.359758  | 2.012715  |
| 8  | -5.093799 | -0.723077 | -0.953758 |
| 8  | -3.316801 | -2.160758 | -1.786630 |
| 16 | -3.598889 | -1.331263 | -0.632411 |
| 1  | 6.043597  | 0.640416  | 1.599373  |

-----  
---  
Different possibilities of Reductive elimination Transition States  
at the SMD/M06/6-31G\*\* Level of Theory  
-----  
---

6 coordination  
-----  
---

conf-1  
-----  
---

Number of imaginary frequencies : 1  
The smallest frequency is : -290.9417 cm(-1)

Electronic energy : =-2793.1534207  
Zero-point correction= 0.350787  
Thermal correction to Energy= 0.388886

S173

Thermal correction to Enthalpy= 0.389830  
 Thermal correction to Gibbs Free Energy= 0.277600  
 Sum of electronic and zero-point Energies= -2792.802634  
 Sum of electronic and thermal Energies= -2792.764535  
 Sum of electronic and thermal Enthalpies= -2792.763591  
 Sum of electronic and thermal Free Energies= -2792.875821

.....  
 Cartesian Coordinates  
 .....

|    |           |           |           |
|----|-----------|-----------|-----------|
| 46 | 0.951280  | -0.541875 | 0.412424  |
| 6  | 0.955466  | 2.397390  | -2.721234 |
| 6  | 1.496034  | 1.799860  | -1.581225 |
| 6  | 0.568370  | 1.425592  | -0.639712 |
| 6  | -0.751484 | 1.786548  | -0.587349 |
| 6  | -1.264857 | 2.348973  | -1.763871 |
| 6  | -0.413207 | 2.630261  | -2.830034 |
| 1  | -1.384431 | 1.615612  | 0.275099  |
| 1  | 0.823173  | -0.871691 | -2.420128 |
| 1  | 2.561154  | 1.627009  | -1.473918 |
| 1  | -0.820009 | 3.064564  | -3.740219 |
| 6  | -2.736150 | 2.597429  | -1.866084 |
| 1  | -3.014604 | 3.017006  | -2.839973 |
| 1  | -3.134075 | 3.255545  | -1.083444 |
| 8  | -2.995600 | -0.085592 | -2.202458 |
| 6  | -4.362861 | -0.116674 | 0.461946  |
| 6  | -3.525119 | -1.039621 | 1.110860  |
| 6  | -5.732381 | -0.306415 | 0.438193  |
| 6  | -4.074475 | -2.160997 | 1.744616  |
| 6  | -6.266487 | -1.431445 | 1.063371  |
| 1  | -6.371682 | 0.425333  | -0.046793 |
| 6  | -5.447337 | -2.351546 | 1.713195  |
| 1  | -3.416907 | -2.863169 | 2.250049  |
| 1  | -7.342436 | -1.582946 | 1.048091  |
| 1  | -5.881740 | -3.218786 | 2.201608  |
| 6  | -2.124618 | -0.829041 | 1.098624  |
| 7  | -0.985638 | -0.620944 | 1.076242  |
| 6  | 0.167842  | -3.454987 | 0.347060  |
| 6  | 0.917616  | -3.377814 | 1.685009  |
| 8  | 1.486771  | -2.287162 | 1.980426  |
| 8  | 0.871999  | -4.410163 | 2.369715  |
| 1  | -0.900427 | -3.570925 | 0.578336  |
| 1  | 0.504493  | -4.359345 | -0.171601 |
| 7  | 0.364581  | -2.303141 | -0.528205 |
| 6  | -0.182170 | -2.287697 | -1.692789 |
| 8  | -0.039368 | -1.344371 | -2.579095 |
| 1  | 1.626206  | 2.673558  | -3.530794 |
| 8  | -3.784436 | 1.015694  | -0.092620 |
| 8  | -5.055027 | 1.350248  | -2.248892 |
| 16 | -3.716197 | 1.092731  | -1.750647 |

|   |           |           |           |
|---|-----------|-----------|-----------|
| 8 | 2.886584  | -0.678484 | -0.164662 |
| 6 | 3.228951  | -0.856787 | -1.381017 |
| 8 | 2.547168  | -0.925057 | -2.394898 |
| 8 | 1.557298  | 1.341241  | 1.151329  |
| 6 | 0.938938  | 1.916924  | 2.147572  |
| 8 | -0.206037 | 1.800615  | 2.514760  |
| 6 | 1.916375  | 2.879437  | 2.856043  |
| 6 | 4.765421  | -0.897202 | -1.511070 |
| 1 | -0.816771 | -3.122305 | -2.009202 |
| 9 | 5.307862  | -1.723644 | -0.622799 |
| 9 | 5.246359  | 0.329467  | -1.289469 |
| 9 | 5.134647  | -1.278534 | -2.725156 |
| 9 | 1.340819  | 3.447204  | 3.905020  |
| 9 | 2.302843  | 3.839100  | 2.014371  |
| 9 | 3.002768  | 2.227832  | 3.267367  |

-----  
 conf-2  
 -----

Number of imaginary frequencies : 1  
 The smallest frequency is : -274.6971 cm(-1)

Electronic energy : =-3022.1430582  
 Zero-point correction= 0.413107  
 Thermal correction to Energy= 0.457332  
 Thermal correction to Enthalpy= 0.458276  
 Thermal correction to Gibbs Free Energy= 0.330435  
 Sum of electronic and zero-point Energies= -3021.729951  
 Sum of electronic and thermal Energies= -3021.685726  
 Sum of electronic and thermal Enthalpies= -3021.684782  
 Sum of electronic and thermal Free Energies= -3021.812623

.....  
 Cartesian Coordinates  
 .....

|    |           |           |           |
|----|-----------|-----------|-----------|
| 46 | -0.670872 | -0.373993 | -0.117894 |
| 6  | 1.634385  | -3.983294 | -0.507338 |
| 6  | 0.529240  | -3.265362 | -0.042591 |
| 6  | 0.829408  | -2.000082 | 0.394517  |
| 6  | 2.064408  | -1.472071 | 0.649262  |
| 6  | 3.141613  | -2.202222 | 0.129948  |
| 6  | 2.917316  | -3.442732 | -0.463581 |
| 1  | 2.223952  | -0.536645 | 1.171563  |
| 1  | 0.268027  | -1.769252 | -2.407917 |
| 1  | -0.472951 | -3.679400 | -0.057229 |
| 1  | 3.757141  | -4.004677 | -0.865247 |
| 6  | 4.509496  | -1.600372 | 0.189619  |
| 1  | 5.255738  | -2.221522 | -0.319183 |

|    |           |           |           |
|----|-----------|-----------|-----------|
| 1  | 4.865428  | -1.401321 | 1.208437  |
| 8  | 3.605049  | 0.140319  | -1.693594 |
| 6  | 3.957459  | 2.287810  | 0.330337  |
| 6  | 2.650822  | 2.773539  | 0.159478  |
| 6  | 5.041683  | 3.142571  | 0.267265  |
| 6  | 2.435208  | 4.137329  | -0.070475 |
| 6  | 4.816102  | 4.497314  | 0.031168  |
| 1  | 6.043834  | 2.749337  | 0.412470  |
| 6  | 3.524971  | 4.992696  | -0.134504 |
| 1  | 1.420305  | 4.505241  | -0.193436 |
| 1  | 5.664707  | 5.174432  | -0.016324 |
| 1  | 3.365914  | 6.052234  | -0.311983 |
| 6  | 1.565397  | 1.863949  | 0.212885  |
| 7  | 0.701335  | 1.097239  | 0.287391  |
| 6  | -1.145160 | 1.798844  | -2.163903 |
| 6  | -2.223401 | 2.121753  | -1.132543 |
| 8  | -2.371436 | 1.362546  | -0.143783 |
| 8  | -2.864567 | 3.172216  | -1.369267 |
| 1  | -0.367286 | 2.570466  | -2.073409 |
| 1  | -1.592041 | 1.883590  | -3.160380 |
| 7  | -0.556978 | 0.472170  | -2.009749 |
| 6  | 0.305562  | 0.058148  | -2.870743 |
| 8  | 0.860779  | -1.119135 | -2.872539 |
| 1  | 1.470776  | -4.977250 | -0.916199 |
| 8  | 4.131937  | 0.940270  | 0.615393  |
| 8  | 6.001021  | 0.290010  | -0.949898 |
| 16 | 4.612246  | -0.013164 | -0.656731 |
| 8  | -2.173867 | -1.644704 | -0.590030 |
| 6  | -2.132604 | -2.433466 | -1.593210 |
| 8  | -1.242317 | -2.634344 | -2.408328 |
| 8  | -0.678429 | -1.433889 | 1.705633  |
| 6  | -0.241764 | -0.898914 | 2.813732  |
| 8  | 0.524453  | 0.021362  | 2.973417  |
| 6  | -0.844339 | -1.657967 | 4.015322  |
| 6  | -3.410291 | -3.295570 | -1.657656 |
| 1  | 0.620588  | 0.712682  | -3.690156 |
| 9  | -4.508569 | -2.564950 | -1.496426 |
| 9  | -3.360098 | -4.198133 | -0.673049 |
| 9  | -3.497606 | -3.940762 | -2.811819 |
| 9  | -0.457929 | -1.113281 | 5.159375  |
| 9  | -0.444733 | -2.930512 | 3.995513  |
| 9  | -2.174480 | -1.640460 | 3.965278  |
| 1  | -3.984063 | 3.404714  | -0.209275 |
| 8  | -4.690408 | 3.533217  | 0.500085  |
| 6  | -5.323889 | 4.675073  | 0.276713  |
| 6  | -6.416590 | 4.921780  | 1.267307  |
| 1  | -6.866040 | 5.903517  | 1.107214  |
| 1  | -7.184304 | 4.146530  | 1.165127  |
| 1  | -6.022598 | 4.851518  | 2.286491  |



8 -5.043830 5.427706 -0.641985

-----  
---  
5-coordination  
-----

---  
conf-4  
-----  
---

Number of imaginary frequencies : 1  
The smallest frequency is : -234.5002 cm(-1)

Electronic energy : =-3022.1594918  
Zero-point correction= 0.415705  
Thermal correction to Energy= 0.459203  
Thermal correction to Enthalpy= 0.460148  
Thermal correction to Gibbs Free Energy= 0.337244  
Sum of electronic and zero-point Energies= -3021.743786  
Sum of electronic and thermal Energies= -3021.700288  
Sum of electronic and thermal Enthalpies= -3021.699344  
Sum of electronic and thermal Free Energies= -3021.822248

-----  
Cartesian Coordinates  
-----

|    |           |           |           |
|----|-----------|-----------|-----------|
| 46 | 1.344499  | 0.328493  | -0.233256 |
| 6  | 0.157688  | -2.545925 | 2.643331  |
| 6  | 1.048212  | -1.861853 | 1.802436  |
| 6  | 0.535120  | -1.681826 | 0.553333  |
| 6  | -0.573802 | -2.190069 | -0.049492 |
| 6  | -1.427215 | -2.866362 | 0.835656  |
| 6  | -1.061340 | -3.021506 | 2.173348  |
| 1  | -0.823388 | -2.060194 | -1.099396 |
| 1  | 2.004514  | -1.475823 | 2.141464  |
| 1  | -1.732020 | -3.548109 | 2.849145  |
| 6  | -2.726507 | -3.392328 | 0.318193  |
| 1  | -3.089324 | -4.249801 | 0.898657  |
| 1  | -2.689956 | -3.681247 | -0.738463 |
| 8  | -4.153843 | -1.610102 | 1.752529  |
| 6  | -3.930387 | 0.177881  | -0.690642 |
| 6  | -3.001297 | 1.200169  | -0.949837 |
| 6  | -5.279915 | 0.466520  | -0.589326 |
| 6  | -3.436507 | 2.525452  | -1.092505 |
| 6  | -5.694994 | 1.789025  | -0.725268 |
| 1  | -6.006782 | -0.323313 | -0.421271 |
| 6  | -4.785742 | 2.813863  | -0.975304 |
| 1  | -2.711109 | 3.313667  | -1.281712 |

S177

|    |           |           |           |
|----|-----------|-----------|-----------|
| 1  | -6.754759 | 2.015584  | -0.642345 |
| 1  | -5.128689 | 3.838800  | -1.079625 |
| 6  | -1.624388 | 0.884776  | -1.036949 |
| 7  | -0.496523 | 0.626219  | -1.146441 |
| 6  | 0.877617  | 3.543856  | -1.046718 |
| 6  | 0.331663  | 3.024506  | 0.274341  |
| 8  | 0.963299  | 2.007673  | 0.828359  |
| 8  | -0.585605 | 3.588310  | 0.846311  |
| 1  | 1.387431  | 2.764098  | -1.619477 |
| 1  | 1.644209  | 4.287569  | -0.785100 |
| 7  | -0.145269 | 4.150539  | -1.858388 |
| 6  | -0.740474 | 5.315025  | -1.513745 |
| 8  | -1.797157 | 5.713736  | -1.985186 |
| 1  | 0.449080  | -2.694505 | 3.680347  |
| 8  | -3.410572 | -1.096802 | -0.604569 |
| 8  | -5.251764 | -2.762564 | -0.187475 |
| 16 | -4.063310 | -2.205914 | 0.433255  |
| 8  | 3.055610  | 0.166967  | 0.838233  |
| 6  | 3.994073  | 0.907273  | 0.358665  |
| 8  | 3.967913  | 1.629153  | -0.620666 |
| 8  | 1.974196  | -1.487257 | -0.994545 |
| 6  | 1.588117  | -1.888103 | -2.175883 |
| 8  | 0.852711  | -1.340300 | -2.962386 |
| 6  | 2.182443  | -3.282218 | -2.459548 |
| 6  | 5.265350  | 0.790800  | 1.222633  |
| 1  | -0.676300 | 3.540927  | -2.474690 |
| 8  | -1.682046 | 0.395349  | 1.776962  |
| 6  | -1.241303 | 0.505387  | 2.907301  |
| 6  | -1.910010 | -0.025624 | 4.133285  |
| 1  | -2.347679 | 0.812615  | 4.688196  |
| 1  | -2.704702 | -0.723426 | 3.860410  |
| 1  | -1.184130 | -0.508289 | 4.794978  |
| 8  | -0.102989 | 1.139245  | 3.185534  |
| 1  | 0.275042  | 1.507418  | 2.345028  |
| 1  | -0.150343 | 5.895910  | -0.777988 |
| 9  | 5.013176  | 1.197697  | 2.467735  |
| 9  | 6.250033  | 1.529360  | 0.731599  |
| 9  | 5.677158  | -0.476346 | 1.279597  |
| 9  | 3.504505  | -3.284709 | -2.315082 |
| 9  | 1.665279  | -4.152640 | -1.588792 |
| 9  | 1.887738  | -3.685005 | -3.685643 |

-----  
---  
conf-5 [6]  
-----  
---

Number of imaginary frequencies : 0

Electronic energy : =-3251.1797474  
Zero-point correction= 0.480497  
Thermal correction to Energy= 0.529747  
Thermal correction to Enthalpy= 0.530691  
Thermal correction to Gibbs Free Energy= 0.395205  
Sum of electronic and zero-point Energies= -3250.699250  
Sum of electronic and thermal Energies= -3250.650000  
Sum of electronic and thermal Enthalpies= -3250.649056  
Sum of electronic and thermal Free Energies= -3250.784543

.....  
Cartesian Coordinates  
.....

|    |           |           |           |
|----|-----------|-----------|-----------|
| 46 | -1.581626 | 0.033077  | -0.150867 |
| 6  | -0.495620 | -3.887001 | -1.332449 |
| 6  | -1.139779 | -2.643280 | -1.298313 |
| 6  | -0.841865 | -1.878639 | -0.200630 |
| 6  | -0.026293 | -2.198893 | 0.851968  |
| 6  | 0.644375  | -3.423715 | 0.750405  |
| 6  | 0.401486  | -4.260514 | -0.337871 |
| 1  | 0.144186  | -1.552153 | 1.706415  |
| 1  | -1.810232 | -2.326395 | -2.090846 |
| 1  | 0.929502  | -5.209528 | -0.410396 |
| 6  | 1.696777  | -3.728890 | 1.764841  |
| 1  | 1.911024  | -4.801331 | 1.854883  |
| 1  | 1.478610  | -3.331644 | 2.763426  |
| 8  | 3.596487  | -3.266327 | -0.089969 |
| 6  | 3.610814  | -0.468439 | 0.790013  |
| 6  | 2.891279  | 0.561427  | 0.161880  |
| 6  | 4.993970  | -0.477463 | 0.739791  |
| 6  | 3.563411  | 1.546771  | -0.574192 |
| 6  | 5.652016  | 0.524842  | 0.030540  |
| 1  | 5.555466  | -1.255276 | 1.250981  |
| 6  | 4.946639  | 1.528204  | -0.631138 |
| 1  | 2.988808  | 2.307014  | -1.098892 |
| 1  | 6.738076  | 0.514045  | -0.005288 |
| 1  | 5.473595  | 2.297523  | -1.187869 |
| 6  | 1.481279  | 0.590542  | 0.230548  |
| 7  | 0.326120  | 0.661625  | 0.331359  |
| 6  | -0.784849 | 2.715910  | -1.837623 |
| 6  | -0.418846 | 1.363551  | -2.436933 |
| 8  | -1.091188 | 0.295021  | -2.106187 |
| 8  | 0.448124  | 1.309639  | -3.307290 |
| 1  | -1.430582 | 2.640709  | -0.956806 |
| 1  | -1.376707 | 3.224441  | -2.611930 |
| 7  | 0.374825  | 3.502472  | -1.500953 |
| 6  | 1.102062  | 4.175537  | -2.397849 |
| 8  | 2.153857  | 4.768919  | -2.133457 |

|    |           |           |           |
|----|-----------|-----------|-----------|
| 1  | -0.699868 | -4.550443 | -2.169326 |
| 8  | 2.876367  | -1.419415 | 1.470825  |
| 8  | 4.265801  | -3.331802 | 2.331036  |
| 16 | 3.285016  | -3.022453 | 1.306088  |
| 8  | -3.375463 | -0.699694 | -0.680623 |
| 6  | -4.230235 | 0.263284  | -0.795095 |
| 8  | -4.038076 | 1.454303  | -0.646931 |
| 8  | -2.094328 | -0.312215 | 1.791662  |
| 6  | -2.284732 | 0.806642  | 2.406359  |
| 8  | -2.198643 | 1.936248  | 1.963936  |
| 6  | -2.659320 | 0.548971  | 3.880207  |
| 6  | -5.611131 | -0.293721 | -1.195750 |
| 1  | 0.727145  | 3.495331  | -0.536208 |
| 8  | 1.919382  | -1.215250 | -1.938117 |
| 6  | 1.762701  | -1.796349 | -2.998062 |
| 6  | 2.371802  | -3.115344 | -3.346050 |
| 1  | 3.156526  | -2.952372 | -4.094536 |
| 1  | 2.816843  | -3.580371 | -2.463312 |
| 1  | 1.631445  | -3.779181 | -3.803166 |
| 8  | 1.043570  | -1.291240 | -3.996889 |
| 1  | 0.759545  | -0.373736 | -3.746625 |
| 1  | 2.892657  | 4.701832  | -0.591943 |
| 8  | 3.471890  | 4.632373  | 0.219024  |
| 6  | 2.843120  | 4.000648  | 1.194831  |
| 6  | 3.703058  | 3.781103  | 2.393259  |
| 1  | 3.094503  | 3.485168  | 3.249422  |
| 1  | 4.415925  | 2.977426  | 2.165336  |
| 1  | 4.284804  | 4.677149  | 2.627255  |
| 8  | 1.687289  | 3.603977  | 1.108045  |
| 1  | 0.682452  | 4.179340  | -3.419199 |
| 9  | -5.543264 | -0.819763 | -2.418922 |
| 9  | -5.996666 | -1.250619 | -0.354087 |
| 9  | -6.526878 | 0.662642  | -1.196521 |
| 9  | -2.824625 | 1.687027  | 4.537270  |
| 9  | -1.698851 | -0.152379 | 4.483628  |
| 9  | -3.790718 | -0.152013 | 3.953259  |

-----  
---  
conf-5 [6-7]<sup>‡</sup>  
-----  
---

Number of imaginary frequencies : 1  
The smallest frequency is : -220.8016 cm(-1)

Electronic energy : =-3251.1577192  
Zero-point correction= 0.480012

S180

|                                              |              |
|----------------------------------------------|--------------|
| Thermal correction to Energy=                | 0.528775     |
| Thermal correction to Enthalpy=              | 0.529719     |
| Thermal correction to Gibbs Free Energy=     | 0.395046     |
| Sum of electronic and zero-point Energies=   | -3250.677707 |
| Sum of electronic and thermal Energies=      | -3250.628944 |
| Sum of electronic and thermal Enthalpies=    | -3250.628000 |
| Sum of electronic and thermal Free Energies= | -3250.762673 |

.....  
 Cartesian Coordinates  
 .....

|    |           |           |           |
|----|-----------|-----------|-----------|
| 46 | -1.511485 | 0.445948  | 0.008905  |
| 6  | -1.402646 | -3.337991 | -1.863303 |
| 6  | -1.986786 | -2.249862 | -1.197850 |
| 6  | -1.241645 | -1.839819 | -0.133828 |
| 6  | -0.166241 | -2.401981 | 0.483128  |
| 6  | 0.372980  | -3.490338 | -0.219097 |
| 6  | -0.238044 | -3.934171 | -1.392986 |
| 1  | 0.284081  | -2.042288 | 1.404390  |
| 1  | -2.896574 | -1.767165 | -1.541024 |
| 1  | 0.189788  | -4.779754 | -1.927478 |
| 6  | 1.601357  | -4.149998 | 0.317624  |
| 1  | 1.679657  | -5.198934 | 0.006087  |
| 1  | 1.671554  | -4.110512 | 1.410918  |
| 8  | 3.109371  | -3.199005 | -1.708374 |
| 6  | 3.663187  | -0.864926 | 0.023031  |
| 6  | 2.971773  | 0.352443  | -0.078865 |
| 6  | 5.013903  | -0.928752 | -0.273617 |
| 6  | 3.640408  | 1.504537  | -0.516706 |
| 6  | 5.667311  | 0.225573  | -0.698863 |
| 1  | 5.557231  | -1.863793 | -0.164987 |
| 6  | 4.988983  | 1.436380  | -0.824325 |
| 1  | 3.084973  | 2.434157  | -0.616711 |
| 1  | 6.727622  | 0.173227  | -0.931526 |
| 1  | 5.512182  | 2.328529  | -1.156098 |
| 6  | 1.599051  | 0.430144  | 0.256513  |
| 7  | 0.484167  | 0.525013  | 0.567952  |
| 6  | -0.278206 | 3.519660  | -0.232999 |
| 6  | -0.075001 | 2.561714  | -1.397821 |
| 8  | -0.978894 | 1.615858  | -1.559820 |
| 8  | 0.825968  | 2.725438  | -2.202927 |
| 1  | -0.848766 | 3.064881  | 0.582140  |
| 1  | -0.895333 | 4.341458  | -0.624168 |
| 7  | 0.965752  | 4.028030  | 0.283693  |
| 6  | 1.699586  | 4.946641  | -0.350832 |
| 8  | 2.851144  | 5.260270  | -0.027397 |
| 1  | -1.892833 | -3.707979 | -2.760609 |
| 8  | 2.942279  | -1.952288 | 0.478990  |
| 8  | 4.249557  | -4.098376 | 0.339182  |
| 16 | 3.124456  | -3.416023 | -0.274264 |

|   |           |           |           |
|---|-----------|-----------|-----------|
| 8 | -3.378668 | 0.396655  | -0.773087 |
| 6 | -4.072935 | 1.435265  | -0.460688 |
| 8 | -3.745693 | 2.397482  | 0.208277  |
| 8 | -2.341290 | -0.855054 | 1.385121  |
| 6 | -1.880106 | -0.864657 | 2.607839  |
| 8 | -0.936409 | -0.269486 | 3.070246  |
| 6 | -2.734476 | -1.819143 | 3.466035  |
| 6 | -5.498220 | 1.322192  | -1.038839 |
| 1 | 1.425825  | 3.531509  | 1.056381  |
| 8 | 1.044617  | -0.798748 | -2.233061 |
| 6 | 0.456134  | -0.914308 | -3.292903 |
| 6 | 0.786908  | -1.923911 | -4.342148 |
| 1 | 1.255750  | -1.413028 | -5.191361 |
| 1 | 1.481724  | -2.665957 | -3.943089 |
| 1 | -0.120857 | -2.407452 | -4.716627 |
| 8 | -0.555561 | -0.123320 | -3.646574 |
| 1 | -0.688245 | 0.550916  | -2.932888 |
| 1 | 3.744679  | 4.355758  | 1.116325  |
| 8 | 4.397893  | 3.811506  | 1.641177  |
| 6 | 3.787693  | 2.837765  | 2.294169  |
| 6 | 4.737903  | 1.935446  | 3.006584  |
| 1 | 4.194393  | 1.140336  | 3.519642  |
| 1 | 5.439971  | 1.502310  | 2.283468  |
| 1 | 5.331736  | 2.507938  | 3.726985  |
| 8 | 2.572433  | 2.684097  | 2.300059  |
| 1 | 1.186752  | 5.439801  | -1.195473 |
| 9 | -5.465892 | 1.083997  | -2.349750 |
| 9 | -6.142764 | 0.311165  | -0.452285 |
| 9 | -6.190783 | 2.433317  | -0.832446 |
| 9 | -2.319954 | -1.826303 | 4.723019  |
| 9 | -2.639799 | -3.057759 | 2.980344  |
| 9 | -4.015135 | -1.458877 | 3.442538  |

-----  
---  
conf-5 [7]  
-----  
---

Number of imaginary frequencies : 0

Electronic energy : =-3251.2268216  
Zero-point correction= 0.483210  
Thermal correction to Energy= 0.532003  
Thermal correction to Enthalpy= 0.532947  
Thermal correction to Gibbs Free Energy= 0.397434  
Sum of electronic and zero-point Energies= -3250.743612  
Sum of electronic and thermal Energies= -3250.694819

S182

Sum of electronic and thermal Enthalpies= -3250.693874  
Sum of electronic and thermal Free Energies= -3250.829388

.....  
Cartesian Coordinates  
.....

|    |           |           |           |
|----|-----------|-----------|-----------|
| 46 | -1.365901 | -0.730169 | -0.004551 |
| 6  | -1.491863 | 3.660027  | 1.446395  |
| 6  | -2.066233 | 2.649883  | 0.681837  |
| 6  | -1.368552 | 2.219608  | -0.432749 |
| 6  | -0.136563 | 2.713286  | -0.813212 |
| 6  | 0.425588  | 3.722969  | -0.034510 |
| 6  | -0.252343 | 4.185281  | 1.095196  |
| 1  | 0.373223  | 2.313148  | -1.687408 |
| 1  | -3.018956 | 2.192588  | 0.940070  |
| 1  | 0.199745  | 4.965862  | 1.704726  |
| 6  | 1.760546  | 4.285336  | -0.396210 |
| 1  | 1.872377  | 5.332510  | -0.086802 |
| 1  | 1.990134  | 4.220439  | -1.466136 |
| 8  | 2.874454  | 3.228877  | 1.829317  |
| 6  | 3.753727  | 0.953320  | 0.100636  |
| 6  | 3.087168  | -0.278855 | 0.185720  |
| 6  | 5.096323  | 1.040420  | 0.431931  |
| 6  | 3.771959  | -1.425088 | 0.617507  |
| 6  | 5.762416  | -0.103708 | 0.865378  |
| 1  | 5.624318  | 1.985446  | 0.343428  |
| 6  | 5.110235  | -1.331503 | 0.960112  |
| 1  | 3.233931  | -2.369485 | 0.683443  |
| 1  | 6.815354  | -0.030084 | 1.124588  |
| 1  | 5.646937  | -2.216119 | 1.290107  |
| 6  | 1.724655  | -0.402363 | -0.172089 |
| 7  | 0.617567  | -0.569772 | -0.476825 |
| 6  | 0.009334  | -3.746760 | -0.169597 |
| 6  | 0.089943  | -2.969212 | 1.136072  |
| 8  | -0.870129 | -2.106100 | 1.387517  |
| 8  | 0.959763  | -3.210911 | 1.957695  |
| 1  | -0.573237 | -3.220193 | -0.930510 |
| 7  | 1.314381  | -4.065895 | -0.690117 |
| 6  | 2.085965  | -5.026214 | -0.172087 |
| 8  | 3.269144  | -5.213831 | -0.477849 |
| 1  | -2.010769 | 4.029816  | 2.326564  |
| 8  | 3.024670  | 2.026517  | -0.379570 |
| 8  | 4.368069  | 4.123872  | 0.021695  |
| 16 | 3.130990  | 3.474847  | 0.421690  |
| 8  | -3.275380 | -0.819387 | 0.629664  |
| 6  | -3.913585 | -1.874173 | 0.260905  |
| 8  | -3.537168 | -2.798990 | -0.435686 |
| 8  | -1.850707 | 1.070366  | -1.121297 |
| 6  | -2.759910 | 1.040692  | -2.122996 |
| 8  | -3.166126 | 0.004292  | -2.548586 |

|   |           |           |           |
|---|-----------|-----------|-----------|
| 6 | -3.195088 | 2.412825  | -2.669385 |
| 6 | -5.340478 | -1.863702 | 0.844366  |
| 1 | 1.767082  | -3.418105 | -1.344959 |
| 8 | 0.570697  | 0.988203  | 2.102932  |
| 6 | -0.029820 | 0.850897  | 3.153036  |
| 6 | -0.056757 | 1.857917  | 4.255487  |
| 1 | 0.314463  | 1.402537  | 5.179930  |
| 1 | 0.559648  | 2.722299  | 3.998062  |
| 1 | -1.087953 | 2.174315  | 4.447351  |
| 8 | -0.747215 | -0.233341 | 3.449633  |
| 1 | -0.674764 | -0.901654 | 2.724378  |
| 1 | 4.162304  | -4.070653 | -1.372330 |
| 8 | 4.802196  | -3.412988 | -1.767693 |
| 6 | 4.158098  | -2.411601 | -2.339687 |
| 6 | 5.078492  | -1.384280 | -2.907292 |
| 1 | 4.511010  | -0.531257 | -3.283747 |
| 1 | 5.787881  | -1.057069 | -2.138700 |
| 1 | 5.663436  | -1.826559 | -3.721211 |
| 8 | 2.936768  | -2.335199 | -2.396262 |
| 9 | -3.844674 | 3.092810  | -1.731038 |
| 9 | -2.133335 | 3.113791  | -3.052410 |
| 9 | -3.991383 | 2.233613  | -3.703858 |
| 9 | -5.292663 | -1.874243 | 2.178593  |
| 9 | -6.037316 | -2.919123 | 0.445081  |
| 9 | -5.996868 | -0.763596 | 0.467988  |
| 1 | 1.571748  | -5.678914 | 0.555469  |
| 1 | -0.541668 | -4.669315 | 0.064713  |

-----  
 ---  
 conf-3  
 -----  
 ---

Number of imaginary frequencies : 1  
 The smallest frequency is : -224.6308 cm(-1)

Electronic energy :        =-3811.7140304  
 Zero-point correction=        0.482205  
 Thermal correction to Energy=        0.535402  
 Thermal correction to Enthalpy=        0.536346  
 Thermal correction to Gibbs Free Energy=        0.393230  
 Sum of electronic and zero-point Energies=        -3811.231825  
 Sum of electronic and thermal Energies=        -3811.178629  
 Sum of electronic and thermal Enthalpies=        -3811.177685  
 Sum of electronic and thermal Free Energies=        -3811.320801

.....  
 Cartesian Coordinates



.....

|    |           |           |           |
|----|-----------|-----------|-----------|
| 46 | 1.611662  | -0.467881 | -0.170215 |
| 6  | 1.475274  | 3.509250  | 1.391601  |
| 6  | 2.062037  | 2.294731  | 1.005077  |
| 6  | 1.294278  | 1.226379  | 1.355122  |
| 6  | 0.188624  | 1.128469  | 2.143437  |
| 6  | -0.373576 | 2.370355  | 2.473619  |
| 6  | 0.271575  | 3.546818  | 2.088447  |
| 1  | -0.258793 | 0.195708  | 2.474288  |
| 1  | 2.991200  | 2.235125  | 0.447520  |
| 1  | -0.164290 | 4.505750  | 2.358813  |
| 6  | -1.677554 | 2.394555  | 3.202672  |
| 1  | -1.923869 | 3.395838  | 3.575721  |
| 1  | -1.735026 | 1.688099  | 4.039541  |
| 8  | -2.793723 | 2.370680  | 0.747566  |
| 6  | -3.654408 | -0.356999 | 1.229672  |
| 6  | -2.945010 | -0.980950 | 0.194194  |
| 6  | -5.033598 | -0.445906 | 1.286098  |
| 6  | -3.629595 | -1.665506 | -0.817006 |
| 6  | -5.705086 | -1.148434 | 0.286512  |
| 1  | -5.570368 | 0.026892  | 2.103579  |
| 6  | -5.012499 | -1.748459 | -0.763304 |
| 1  | -3.061924 | -2.111767 | -1.631252 |
| 1  | -6.788466 | -1.220356 | 0.329750  |
| 1  | -5.550050 | -2.282767 | -1.541216 |
| 6  | -1.529529 | -0.936219 | 0.160238  |
| 7  | -0.371808 | -0.947765 | 0.142554  |
| 6  | 0.785635  | -2.645769 | -2.429354 |
| 6  | 0.389707  | -1.203680 | -2.716880 |
| 8  | 1.061640  | -0.245220 | -2.110601 |
| 8  | -0.462904 | -0.952447 | -3.549961 |
| 1  | 1.447942  | -2.743264 | -1.563870 |
| 1  | 1.362510  | -2.976615 | -3.304272 |
| 7  | -0.365767 | -3.492939 | -2.250286 |
| 6  | -1.084620 | -3.977296 | -3.266000 |
| 8  | -2.145509 | -4.599299 | -3.134442 |
| 1  | 1.984860  | 4.428728  | 1.115674  |
| 8  | -2.935965 | 0.333179  | 2.198622  |
| 8  | -4.300033 | 2.378012  | 2.761838  |
| 16 | -3.056567 | 1.987644  | 2.124080  |
| 8  | 3.463627  | 0.163076  | -0.671829 |
| 6  | 4.271904  | -0.808156 | -0.924883 |
| 8  | 4.063533  | -2.005786 | -0.878439 |
| 8  | 2.424102  | -0.550614 | 1.722722  |
| 6  | 1.955579  | -1.441837 | 2.555298  |
| 8  | 1.077979  | -2.254230 | 2.384744  |
| 6  | 2.671354  | -1.295717 | 3.913198  |
| 6  | 5.650234  | -0.257722 | -1.342457 |
| 1  | -0.743248 | -3.637879 | -1.305429 |

|   |           |           |           |
|---|-----------|-----------|-----------|
| 8 | 0.625329  | 2.425927  | -2.195793 |
| 1 | 0.701936  | 1.447523  | -2.243950 |
| 1 | -2.881140 | -4.793660 | -1.608569 |
| 8 | -3.445169 | -4.903210 | -0.789705 |
| 6 | -2.803295 | -4.498660 | 0.291387  |
| 6 | -3.627048 | -4.604807 | 1.529936  |
| 1 | -3.016078 | -4.400034 | 2.410696  |
| 1 | -4.442881 | -3.872230 | 1.476101  |
| 1 | -4.085225 | -5.595675 | 1.605343  |
| 8 | -1.661415 | -4.054119 | 0.275381  |
| 1 | -0.644102 | -3.799215 | -4.263177 |
| 9 | 5.531870  | 0.490087  | -2.440645 |
| 9 | 6.160484  | 0.506985  | -0.376292 |
| 9 | 6.504318  | -1.238820 | -1.593961 |
| 9 | 2.283460  | -2.236300 | 4.759856  |
| 9 | 2.365590  | -0.102517 | 4.431418  |
| 9 | 3.992161  | -1.363130 | 3.774829  |
| 6 | -0.553798 | 2.782478  | -1.561850 |
| 1 | -0.610994 | 2.459044  | -0.504460 |
| 6 | -0.611951 | 4.304436  | -1.590357 |
| 6 | -1.761371 | 2.174039  | -2.282529 |
| 9 | 0.546240  | 4.825926  | -1.189589 |
| 9 | -1.567066 | 4.779289  | -0.791933 |
| 9 | -0.850535 | 4.751318  | -2.827838 |
| 9 | -1.597844 | 2.190682  | -3.603013 |
| 9 | -2.902585 | 2.803137  | -2.002437 |
| 9 | -1.902971 | 0.895119  | -1.909755 |

-----  
 ---  
 conf-6  
 -----

---  
 The smallest frequency is : -211.4531 cm(-1)

Electronic energy : =-4372.2652819  
 Zero-point correction= 0.484198  
 Thermal correction to Energy= 0.541902  
 Thermal correction to Enthalpy= 0.542846  
 Thermal correction to Gibbs Free Energy= 0.388845  
 Sum of electronic and zero-point Energies= -4371.781084  
 Sum of electronic and thermal Energies= -4371.723380  
 Sum of electronic and thermal Enthalpies= -4371.722436  
 Sum of electronic and thermal Free Energies= -4371.876437

.....  
 Cartesian Coordinates  
 .....  
 46 1.815407 -1.252746 -0.008150

|    |           |           |           |
|----|-----------|-----------|-----------|
| 6  | 4.069564  | 2.133531  | 1.328619  |
| 6  | 3.824391  | 0.787246  | 1.018978  |
| 6  | 2.568951  | 0.397166  | 1.376103  |
| 6  | 1.617940  | 1.016158  | 2.130285  |
| 6  | 1.898151  | 2.367336  | 2.382128  |
| 6  | 3.113253  | 2.915573  | 1.968166  |
| 1  | 0.702078  | 0.554633  | 2.488258  |
| 1  | 4.544319  | 0.156650  | 0.506840  |
| 1  | 3.322747  | 3.962511  | 2.175938  |
| 6  | 0.851091  | 3.200845  | 3.045329  |
| 1  | 1.242898  | 4.167831  | 3.382082  |
| 1  | 0.359884  | 2.709245  | 3.893782  |
| 8  | -0.005247 | 3.703760  | 0.533954  |
| 6  | -2.325750 | 2.088604  | 1.044246  |
| 6  | -2.111501 | 1.088362  | 0.082849  |
| 6  | -3.456051 | 2.883924  | 0.990230  |
| 6  | -3.016725 | 0.925622  | -0.974560 |
| 6  | -4.354933 | 2.708094  | -0.059677 |
| 1  | -3.625053 | 3.634292  | 1.757123  |
| 6  | -4.126083 | 1.754122  | -1.048829 |
| 1  | -2.828698 | 0.165851  | -1.730436 |
| 1  | -5.239268 | 3.337703  | -0.109103 |
| 1  | -4.820991 | 1.650076  | -1.877807 |
| 6  | -0.985143 | 0.235879  | 0.180061  |
| 7  | -0.098298 | -0.504372 | 0.283715  |
| 6  | -0.317420 | -2.624545 | -2.085013 |
| 6  | 0.321613  | -1.319358 | -2.545767 |
| 8  | 1.435825  | -0.923689 | -1.966354 |
| 8  | -0.146597 | -0.704735 | -3.488025 |
| 1  | 0.147583  | -3.043564 | -1.188408 |
| 1  | -0.144192 | -3.346338 | -2.894268 |
| 7  | -1.738508 | -2.481496 | -1.858138 |
| 6  | -2.653929 | -2.468468 | -2.836870 |
| 8  | -3.860295 | -2.278662 | -2.658859 |
| 1  | 5.027008  | 2.556355  | 1.036299  |
| 8  | -1.377168 | 2.254719  | 2.045005  |
| 8  | -1.236061 | 4.740523  | 2.466973  |
| 16 | -0.469404 | 3.642526  | 1.908720  |
| 8  | 3.688037  | -1.767187 | -0.556637 |
| 6  | 3.769836  | -2.985331 | -0.969829 |
| 8  | 2.899814  | -3.834232 | -1.011682 |
| 8  | 2.502794  | -1.691029 | 1.883469  |
| 6  | 1.646699  | -2.076753 | 2.789517  |
| 8  | 0.444756  | -2.171995 | 2.711488  |
| 6  | 2.399203  | -2.374643 | 4.101765  |
| 6  | 5.198265  | -3.276941 | -1.474793 |
| 1  | -2.065161 | -2.305292 | -0.910997 |
| 8  | 2.826996  | 1.349838  | -2.350689 |
| 1  | 2.288767  | 0.527373  | -2.346824 |

|   |           |           |           |
|---|-----------|-----------|-----------|
| 1 | -2.237984 | -2.654528 | -3.841937 |
| 9 | 5.463268  | -2.518831 | -2.540018 |
| 9 | 6.099613  | -2.994022 | -0.534327 |
| 9 | 5.337190  | -4.548446 | -1.819905 |
| 9 | 1.592184  | -2.913750 | 5.001760  |
| 9 | 2.875265  | -1.225637 | 4.588028  |
| 9 | 3.423691  | -3.198087 | 3.900199  |
| 6 | 2.119415  | 2.371600  | -1.741885 |
| 1 | 1.862878  | 2.166946  | -0.686115 |
| 6 | 3.017477  | 3.603474  | -1.765256 |
| 6 | 0.799799  | 2.644026  | -2.474098 |
| 9 | 4.268595  | 3.282767  | -1.441985 |
| 9 | 2.599795  | 4.527698  | -0.898965 |
| 9 | 3.046765  | 4.156395  | -2.982988 |
| 9 | 0.936093  | 2.482668  | -3.787231 |
| 9 | 0.337260  | 3.875749  | -2.257559 |
| 9 | -0.138251 | 1.785089  | -2.054647 |
| 1 | -4.434352 | -2.275703 | -1.029885 |
| 8 | -4.793477 | -2.137563 | -0.120602 |
| 6 | -5.789902 | -1.181227 | -0.212516 |
| 1 | -5.557320 | -0.371773 | -0.924188 |
| 6 | -7.080341 | -1.821639 | -0.712057 |
| 6 | -5.946867 | -0.519927 | 1.149005  |
| 9 | -8.091848 | -0.949712 | -0.738259 |
| 9 | -6.886609 | -2.264842 | -1.957740 |
| 9 | -7.453826 | -2.864245 | 0.027895  |
| 9 | -6.486593 | -1.340577 | 2.052703  |
| 9 | -6.720485 | 0.564925  | 1.062530  |
| 9 | -4.760638 | -0.134883 | 1.617720  |

-----  
 ---  
**(III) Acetoxylation product using Boc-Ala-OH at the SMD/M06/6-31G\*\* Level of Theory**  
 -----  
 ---

Boc-Ala-OH  
 -----  
 ---

Number of imaginary frequencies : 0

Electronic energy : =-669.2190371  
 Zero-point correction= 0.234033  
 Thermal correction to Energy= 0.248915  
 Thermal correction to Enthalpy= 0.249859  
 Thermal correction to Gibbs Free Energy= 0.191831  
 Sum of electronic and zero-point Energies= -668.985004

S188

Sum of electronic and thermal Energies= -668.970122  
Sum of electronic and thermal Enthalpies= -668.969178  
Sum of electronic and thermal Free Energies= -669.027206

.....  
Cartesian Coordinates  
.....

|   |           |           |           |
|---|-----------|-----------|-----------|
| 6 | -2.026725 | 0.433524  | 0.113903  |
| 6 | -3.120078 | -0.607225 | 0.102895  |
| 8 | -2.981789 | -1.752610 | -0.272001 |
| 8 | -4.270857 | -0.108277 | 0.547239  |
| 1 | -1.945373 | 0.806715  | 1.145348  |
| 7 | -0.790906 | -0.213752 | -0.257631 |
| 1 | -0.835768 | -1.127819 | -0.692405 |
| 6 | 0.408276  | 0.295445  | 0.111935  |
| 8 | 0.540738  | 1.344607  | 0.728342  |
| 1 | -4.945167 | -0.808843 | 0.506691  |
| 6 | -2.376541 | 1.600538  | -0.805715 |
| 1 | -2.514085 | 1.251663  | -1.835610 |
| 1 | -1.558499 | 2.327316  | -0.789613 |
| 1 | -3.291266 | 2.101837  | -0.475226 |
| 8 | 1.397239  | -0.510355 | -0.300960 |
| 6 | 2.801970  | -0.200515 | -0.018731 |
| 6 | 3.531184  | -1.363285 | -0.665632 |
| 1 | 3.211369  | -2.315896 | -0.226984 |
| 1 | 4.611507  | -1.259183 | -0.514566 |
| 1 | 3.334416  | -1.393548 | -1.743868 |
| 6 | 3.196425  | 1.105626  | -0.683663 |
| 1 | 2.713723  | 1.966312  | -0.213784 |
| 1 | 2.930058  | 1.086948  | -1.747541 |
| 1 | 4.282874  | 1.235310  | -0.609810 |
| 6 | 3.039814  | -0.192190 | 1.479755  |
| 1 | 2.693150  | -1.132887 | 1.924930  |
| 1 | 2.526140  | 0.639532  | 1.969669  |
| 1 | 4.114667  | -0.099631 | 1.676754  |

-----  
---  
PhI(OAc)<sub>2</sub>  
-----  
---

Number of imaginary frequencies : 0

Electronic energy : =-699.4835034  
Zero-point correction= 0.192310  
Thermal correction to Energy= 0.209232  
Thermal correction to Enthalpy= 0.210176  
Thermal correction to Gibbs Free Energy= 0.144737

Sum of electronic and zero-point Energies= -699.291193  
Sum of electronic and thermal Energies= -699.274272  
Sum of electronic and thermal Enthalpies= -699.273327  
Sum of electronic and thermal Free Energies= -699.338766

-----  
Cartesian Coordinates  
-----

|    |           |           |           |
|----|-----------|-----------|-----------|
| 6  | 0.472433  | 3.588234  | 1.024559  |
| 6  | 0.535954  | 2.197719  | 1.039600  |
| 6  | -0.061449 | 1.499593  | -0.001014 |
| 6  | -0.719490 | 2.133942  | -1.046044 |
| 6  | -0.781366 | 3.524780  | -1.038872 |
| 6  | -0.185923 | 4.247633  | -0.009257 |
| 1  | 0.937193  | 4.152704  | 1.829388  |
| 1  | 1.044379  | 1.673456  | 1.844762  |
| 1  | -1.179577 | 1.562246  | -1.847790 |
| 1  | -1.293605 | 4.041272  | -1.847060 |
| 1  | -0.234897 | 5.333919  | -0.012520 |
| 53 | 0.028796  | -0.622267 | 0.010346  |
| 8  | -2.040138 | -2.609693 | 0.087980  |
| 8  | 2.250363  | -2.431838 | -0.116321 |
| 6  | -2.699005 | -1.570238 | 0.108162  |
| 8  | -2.149803 | -0.386320 | 0.086724  |
| 6  | 2.821029  | -1.341763 | -0.119701 |
| 8  | 2.176361  | -0.207233 | -0.064672 |
| 6  | -4.197566 | -1.543568 | 0.161707  |
| 1  | -4.595834 | -2.559994 | 0.172597  |
| 1  | -4.524670 | -1.007881 | 1.058880  |
| 1  | -4.589878 | -0.999467 | -0.703458 |
| 6  | 4.311091  | -1.189889 | -0.185192 |
| 1  | 4.788864  | -2.166960 | -0.281232 |
| 1  | 4.583214  | -0.556940 | -1.035828 |
| 1  | 4.670081  | -0.690207 | 0.720529  |

-----  
---  
Different Possibilities of Potential Active Catalyst at the SMD/M06/6-31G\*\* Level of Theory.  
-----  
---

(2a')

-----  
---  
Number of imaginary frequencies : 0

Electronic energy : =-1252.7277982  
Zero-point correction= 0.339244  
Thermal correction to Energy= 0.365550  
Thermal correction to Enthalpy= 0.366494

S190

|                                              |              |
|----------------------------------------------|--------------|
| Thermal correction to Gibbs Free Energy=     | 0.281153     |
| Sum of electronic and zero-point Energies=   | -1252.388554 |
| Sum of electronic and thermal Energies=      | -1252.362248 |
| Sum of electronic and thermal Enthalpies=    | -1252.361304 |
| Sum of electronic and thermal Free Energies= | -1252.446645 |

.....  
 Cartesian Coordinates  
 .....

|    |           |           |           |
|----|-----------|-----------|-----------|
| 46 | -1.820222 | 0.547486  | 0.142569  |
| 1  | -2.186411 | -2.004953 | -0.898446 |
| 6  | -3.154907 | -2.032151 | 0.780527  |
| 8  | -2.945214 | -2.471318 | -0.420779 |
| 6  | -4.052244 | -2.875377 | 1.609156  |
| 1  | -4.204021 | -2.429691 | 2.592588  |
| 1  | -3.618666 | -3.875658 | 1.709189  |
| 1  | -5.012745 | -2.985450 | 1.094639  |
| 8  | -2.669098 | -0.984895 | 1.251011  |
| 6  | 1.559532  | -1.851099 | -0.939970 |
| 6  | 0.152499  | -1.287076 | -0.826023 |
| 8  | -0.011702 | -0.385587 | 0.070787  |
| 8  | -0.730611 | -1.751903 | -1.564701 |
| 1  | 1.825471  | -1.829896 | -2.004907 |
| 7  | 2.495951  | -1.017538 | -0.214940 |
| 1  | 2.121119  | -0.463735 | 0.541238  |
| 6  | 3.799059  | -0.958807 | -0.558063 |
| 8  | 4.305305  | -1.688368 | -1.401546 |
| 6  | -2.609826 | 2.734249  | -0.595467 |
| 8  | -3.378857 | 1.925514  | 0.024137  |
| 6  | -3.058760 | 4.075494  | -1.018241 |
| 1  | -2.492316 | 4.405975  | -1.892820 |
| 1  | -2.876174 | 4.781258  | -0.199434 |
| 1  | -4.130510 | 4.066444  | -1.232578 |
| 8  | -1.413913 | 2.331879  | -0.810210 |
| 8  | 4.582277  | -0.075395 | 0.084984  |
| 6  | 1.560830  | -3.294858 | -0.449307 |
| 1  | 1.265211  | -3.341903 | 0.605879  |
| 1  | 2.567420  | -3.713320 | -0.548257 |
| 1  | 0.868114  | -3.904197 | -1.038355 |
| 6  | 4.154549  | 1.173201  | 0.730721  |
| 6  | 5.484722  | 1.863163  | 0.978906  |
| 1  | 6.021607  | 2.009723  | 0.034796  |
| 1  | 6.113448  | 1.261492  | 1.646048  |
| 1  | 5.323541  | 2.841864  | 1.444266  |
| 6  | 3.302374  | 1.998372  | -0.216480 |
| 1  | 3.132990  | 2.986771  | 0.226905  |
| 1  | 2.321853  | 1.549239  | -0.408414 |
| 1  | 3.818041  | 2.136982  | -1.174071 |
| 6  | 3.464125  | 0.903026  | 2.059532  |
| 1  | 2.404802  | 0.631163  | 1.969637  |

|   |          |          |          |
|---|----------|----------|----------|
| 1 | 3.491215 | 1.815111 | 2.667169 |
| 1 | 3.987370 | 0.112922 | 2.610142 |

-----  
---  
**(2b')**  
-----  
---

Number of imaginary frequencies : 0

|                                              |              |
|----------------------------------------------|--------------|
| Electronic energy :                          | =-1023.74123 |
| Zero-point correction=                       | 0.275800     |
| Thermal correction to Energy=                | 0.296386     |
| Thermal correction to Enthalpy=              | 0.297330     |
| Thermal correction to Gibbs Free Energy=     | 0.226222     |
| Sum of electronic and zero-point Energies=   | -1023.465430 |
| Sum of electronic and thermal Energies=      | -1023.444844 |
| Sum of electronic and thermal Enthalpies=    | -1023.443900 |
| Sum of electronic and thermal Free Energies= | -1023.515008 |

-----  
Cartesian Coordinates  
-----

|    |           |           |           |
|----|-----------|-----------|-----------|
| 46 | 1.583767  | 0.205164  | -0.056894 |
| 6  | -0.778463 | 1.944597  | 0.004499  |
| 6  | 0.446065  | 2.793253  | -0.299646 |
| 8  | 1.599353  | 2.186138  | -0.370125 |
| 8  | 0.336836  | 4.005118  | -0.435877 |
| 1  | -1.524804 | 2.149480  | -0.775314 |
| 7  | -0.397205 | 0.531584  | -0.034700 |
| 6  | -1.289697 | -0.407241 | -0.133001 |
| 8  | -0.982872 | -1.683781 | -0.143282 |
| 8  | 1.867083  | -1.838029 | 0.240320  |
| 6  | 3.140529  | -1.707142 | 0.127300  |
| 8  | 3.591654  | -0.537056 | -0.055467 |
| 6  | 4.033693  | -2.885598 | 0.192993  |
| 1  | 4.859935  | -2.686328 | 0.882079  |
| 1  | 4.466487  | -3.055401 | -0.799558 |
| 1  | 3.484245  | -3.776118 | 0.505644  |
| 1  | -0.023277 | -1.834886 | -0.012715 |
| 6  | -1.328850 | 2.344047  | 1.366537  |
| 1  | -2.231049 | 1.773206  | 1.610185  |
| 1  | -1.581121 | 3.409114  | 1.363929  |
| 1  | -0.578359 | 2.164834  | 2.146813  |
| 8  | -2.546219 | -0.082093 | -0.251955 |
| 6  | -3.699764 | -1.014371 | -0.086025 |
| 6  | -3.743471 | -1.975275 | -1.255152 |
| 1  | -4.688608 | -2.529639 | -1.216731 |



|   |           |           |           |
|---|-----------|-----------|-----------|
| 1 | -2.924981 | -2.699849 | -1.233965 |
| 1 | -3.711781 | -1.425768 | -2.203033 |
| 6 | -3.608751 | -1.698854 | 1.261590  |
| 1 | -2.807636 | -2.441389 | 1.304737  |
| 1 | -4.556582 | -2.214469 | 1.454824  |
| 1 | -3.457518 | -0.960153 | 2.058467  |
| 6 | -4.872275 | -0.055812 | -0.126662 |
| 1 | -5.807000 | -0.618200 | -0.027901 |
| 1 | -4.897007 | 0.491016  | -1.075968 |
| 1 | -4.814586 | 0.667896  | 0.694999  |

-----  
 ---  
 (2d')  
 -----  
 ---

Number of imaginary frequencies : 0

Electronic energy :        =-1813.2923194  
 Zero-point correction=                0.341062  
 Thermal correction to Energy=        0.371944  
 Thermal correction to Enthalpy=       0.372888  
 Thermal correction to Gibbs Free Energy=   0.275961  
 Sum of electronic and zero-point Energies=   -1812.951258  
 Sum of electronic and thermal Energies=   -1812.920375  
 Sum of electronic and thermal Enthalpies=   -1812.919431  
 Sum of electronic and thermal Free Energies=   -1813.016358

.....  
 Cartesian Coordinates  
 .....

|    |           |           |           |
|----|-----------|-----------|-----------|
| 46 | 1.264691  | 1.294756  | -0.329782 |
| 6  | 1.826088  | 3.640017  | 0.053468  |
| 8  | 2.721034  | 2.728415  | -0.034681 |
| 6  | 2.184719  | 5.060468  | 0.236679  |
| 1  | 2.311192  | 5.519549  | -0.751142 |
| 1  | 3.128794  | 5.148670  | 0.780377  |
| 1  | 1.384484  | 5.588393  | 0.761675  |
| 8  | 0.613716  | 3.257445  | -0.054276 |
| 6  | -2.131811 | -1.471671 | -0.884927 |
| 6  | -0.738562 | -0.920207 | -0.747960 |
| 8  | -0.556452 | 0.293605  | -0.547236 |
| 8  | 0.198787  | -1.796259 | -0.889351 |
| 1  | -2.220178 | -2.283734 | -0.150261 |
| 7  | -3.100532 | -0.458033 | -0.549182 |
| 1  | -2.938666 | 0.498746  | -0.838757 |
| 6  | -4.330362 | -0.806064 | -0.089978 |
| 8  | -4.653250 | -1.953876 | 0.181863  |

|   |           |           |           |
|---|-----------|-----------|-----------|
| 8 | 2.310500  | -0.418485 | -0.619166 |
| 1 | 1.118844  | -1.356029 | -0.800961 |
| 6 | 3.287635  | -0.662742 | 0.323159  |
| 6 | 2.720617  | -1.429969 | 1.515789  |
| 6 | 4.417689  | -1.414134 | -0.374697 |
| 1 | 3.734665  | 0.261952  | 0.728227  |
| 9 | 1.637540  | -0.798358 | 1.981047  |
| 9 | 3.593775  | -1.525168 | 2.518223  |
| 9 | 2.345102  | -2.668189 | 1.178126  |
| 9 | 4.979979  | -0.622626 | -1.288995 |
| 9 | 3.977186  | -2.504904 | -1.003426 |
| 9 | 5.369262  | -1.791097 | 0.482438  |
| 6 | -2.330045 | -2.044954 | -2.287161 |
| 1 | -2.225434 | -1.258045 | -3.043103 |
| 1 | -3.338130 | -2.465284 | -2.359217 |
| 1 | -1.607196 | -2.838998 | -2.496478 |
| 8 | -5.101806 | 0.282352  | 0.020275  |
| 6 | -6.479882 | 0.192666  | 0.517359  |
| 6 | -6.940171 | 1.637614  | 0.474028  |
| 1 | -6.310049 | 2.266398  | 1.114254  |
| 1 | -7.974342 | 1.711264  | 0.828831  |
| 1 | -6.896907 | 2.030536  | -0.548592 |
| 6 | -7.316039 | -0.658896 | -0.420017 |
| 1 | -7.007893 | -1.707841 | -0.404925 |
| 1 | -7.240207 | -0.282226 | -1.447457 |
| 1 | -8.368390 | -0.603551 | -0.116331 |
| 6 | -6.487845 | -0.323033 | 1.944637  |
| 1 | -5.823597 | 0.282293  | 2.573531  |
| 1 | -6.174096 | -1.368475 | 2.004209  |
| 1 | -7.502957 | -0.243234 | 2.351968  |

-----  
 ---  
 (2')  
 -----  
 ---

Number of imaginary frequencies : 0

Electronic energy : =-1813.3055022  
 Zero-point correction= 0.339066  
 Thermal correction to Energy= 0.369292  
 Thermal correction to Enthalpy= 0.370237  
 Thermal correction to Gibbs Free Energy= 0.276951  
 Sum of electronic and zero-point Energies= -1812.966436  
 Sum of electronic and thermal Energies= -1812.936210  
 Sum of electronic and thermal Enthalpies= -1812.935266  
 Sum of electronic and thermal Free Energies= -1813.028552

.....  
 Cartesian Coordinates  
 .....

|    |           |           |           |
|----|-----------|-----------|-----------|
| 46 | -0.738791 | 1.066232  | -0.249383 |
| 6  | 1.830499  | 2.438883  | 0.050512  |
| 6  | 0.721785  | 3.438854  | 0.335709  |
| 8  | -0.511261 | 3.016326  | 0.184885  |
| 8  | 0.976801  | 4.587379  | 0.658960  |
| 1  | 2.448221  | 2.388881  | 0.959373  |
| 7  | 1.263866  | 1.120891  | -0.239370 |
| 6  | 2.020064  | 0.040391  | -0.242212 |
| 8  | 1.577726  | -1.123396 | -0.538715 |
| 8  | -0.795263 | -0.943454 | -0.748458 |
| 1  | 0.448804  | -1.126899 | -0.689831 |
| 6  | -1.568475 | -1.802354 | 0.017929  |
| 6  | -1.874465 | -3.024243 | -0.844887 |
| 6  | -0.882714 | -2.178627 | 1.332350  |
| 1  | -2.535740 | -1.349995 | 0.284575  |
| 9  | -0.762491 | -3.553856 | -1.357813 |
| 9  | -2.657936 | -2.668840 | -1.862947 |
| 9  | -2.502836 | -3.978301 | -0.155340 |
| 9  | 0.170206  | -2.980022 | 1.143436  |
| 9  | -1.724349 | -2.796968 | 2.160147  |
| 9  | -0.440652 | -1.080435 | 1.951490  |
| 8  | -2.855246 | 1.079719  | -0.183645 |
| 6  | -3.588658 | 2.045558  | 0.084855  |
| 8  | -3.156261 | 3.241124  | 0.373875  |
| 6  | -5.065898 | 1.909028  | 0.091583  |
| 1  | -5.491579 | 2.590089  | -0.653030 |
| 1  | -5.455043 | 2.212111  | 1.068860  |
| 1  | -5.359599 | 0.882805  | -0.130509 |
| 1  | -2.163294 | 3.306679  | 0.354885  |
| 6  | 2.669806  | 2.966204  | -1.107309 |
| 1  | 3.510138  | 2.295549  | -1.313254 |
| 1  | 3.064391  | 3.956506  | -0.858715 |
| 1  | 2.057076  | 3.050220  | -2.013384 |
| 8  | 3.285810  | 0.210297  | 0.076149  |
| 6  | 4.298158  | -0.869973 | 0.059633  |
| 6  | 3.952215  | -1.908649 | 1.108224  |
| 1  | 3.039882  | -2.460863 | 0.865721  |
| 1  | 3.828754  | -1.434179 | 2.089111  |
| 1  | 4.778417  | -2.625997 | 1.180877  |
| 6  | 4.426166  | -1.441821 | -1.337958 |
| 1  | 4.550491  | -0.635123 | -2.071016 |
| 1  | 3.565569  | -2.051697 | -1.623255 |
| 1  | 5.321150  | -2.073867 | -1.379341 |
| 6  | 5.557829  | -0.118904 | 0.444452  |
| 1  | 5.790141  | 0.656145  | -0.295915 |
| 1  | 6.402407  | -0.814629 | 0.494452  |

1 5.443321 0.357117 1.425157

-----  
---  
(2e')  
-----  
---

Number of imaginary frequencies : 0

Electronic energy : =-1252.7430756  
Zero-point correction= 0.338413  
Thermal correction to Energy= 0.364770  
Thermal correction to Enthalpy= 0.365714  
Thermal correction to Gibbs Free Energy= 0.280157  
Sum of electronic and zero-point Energies= -1252.404663  
Sum of electronic and thermal Energies= -1252.378306  
Sum of electronic and thermal Enthalpies= -1252.377361  
Sum of electronic and thermal Free Energies= -1252.462919

.....  
Cartesian Coordinates  
.....

|    |           |           |           |
|----|-----------|-----------|-----------|
| 46 | -1.082599 | -0.012956 | 0.100052  |
| 6  | 0.945240  | -1.976292 | 0.603429  |
| 6  | -0.256323 | -2.693295 | 0.010005  |
| 8  | -1.168846 | -1.922305 | -0.545368 |
| 8  | -0.360667 | -3.908131 | 0.034392  |
| 1  | 1.820971  | -2.362677 | 0.064492  |
| 7  | 0.819180  | -0.538420 | 0.375445  |
| 6  | 1.836014  | 0.193610  | -0.094734 |
| 8  | 1.723623  | 1.332903  | -0.581185 |
| 8  | -1.142296 | 1.881179  | 1.020749  |
| 8  | -3.150880 | 0.389274  | -0.205327 |
| 6  | -4.026909 | -0.422671 | -0.539692 |
| 8  | -3.804141 | -1.682470 | -0.799928 |
| 6  | -5.446907 | -0.014239 | -0.679319 |
| 1  | -6.069043 | -0.634520 | -0.025812 |
| 1  | -5.773846 | -0.197834 | -1.708221 |
| 1  | -5.572308 | 1.039739  | -0.429565 |
| 1  | -2.840510 | -1.924118 | -0.713460 |
| 6  | -0.917002 | 2.958926  | 0.440531  |
| 8  | -0.126495 | 3.073872  | -0.581528 |
| 6  | -1.551922 | 4.220408  | 0.898591  |
| 1  | -2.067886 | 4.689866  | 0.054437  |
| 1  | -0.774600 | 4.916829  | 1.230152  |
| 1  | -2.255151 | 4.029176  | 1.709563  |
| 1  | 0.469110  | 2.252775  | -0.669032 |
| 6  | 1.085893  | -2.310472 | 2.079717  |

|   |          |           |           |
|---|----------|-----------|-----------|
| 1 | 1.994231 | -1.846949 | 2.479740  |
| 1 | 1.150949 | -3.394190 | 2.223892  |
| 1 | 0.224142 | -1.931219 | 2.643944  |
| 8 | 3.022037 | -0.416226 | 0.039180  |
| 6 | 4.281867 | 0.182415  | -0.418489 |
| 6 | 4.240604 | 0.434735  | -1.914295 |
| 1 | 5.246242 | 0.702636  | -2.260359 |
| 1 | 3.558786 | 1.246298  | -2.179468 |
| 1 | 3.931914 | -0.474139 | -2.445299 |
| 6 | 4.586611 | 1.431332  | 0.386313  |
| 1 | 4.541151 | 1.212587  | 1.460093  |
| 1 | 3.895426 | 2.247413  | 0.162783  |
| 1 | 5.603443 | 1.769674  | 0.153067  |
| 6 | 5.289534 | -0.907496 | -0.099709 |
| 1 | 6.295659 | -0.581295 | -0.386178 |
| 1 | 5.055490 | -1.826585 | -0.650075 |
| 1 | 5.292245 | -1.135071 | 0.972801  |

-----  
 ---  
 (2f')  
 -----  
 ---

Number of imaginary frequencies : 0

Electronic energy :        =-3163.3938551  
 Zero-point correction=            0.412095  
 Thermal correction to Energy=        0.456764  
 Thermal correction to Enthalpy=        0.457708  
 Thermal correction to Gibbs Free Energy=    0.332346  
 Sum of electronic and zero-point Energies=   -3162.981760  
 Sum of electronic and thermal Energies=   -3162.937091  
 Sum of electronic and thermal Enthalpies=   -3162.936147  
 Sum of electronic and thermal Free Energies=  -3163.061509

-----  
 Cartesian Coordinates  
 -----

|    |           |           |           |
|----|-----------|-----------|-----------|
| 46 | -0.742656 | 0.047112  | -0.202902 |
| 8  | -2.409680 | -1.329675 | -0.375258 |
| 6  | 2.886245  | 2.346982  | -0.987915 |
| 6  | 1.427573  | 2.001023  | -0.826376 |
| 8  | 1.110546  | 0.976749  | -0.195039 |
| 8  | 0.589599  | 2.811480  | -1.377765 |
| 1  | 3.068970  | 3.205600  | -0.320529 |
| 7  | 3.679172  | 1.217692  | -0.553797 |
| 1  | 3.213437  | 0.358328  | -0.289235 |
| 6  | 4.957475  | 1.371199  | -0.120379 |

S197

|   |           |           |           |
|---|-----------|-----------|-----------|
| 8 | 5.583854  | 2.418801  | -0.182962 |
| 8 | -1.680479 | 1.772385  | -0.758704 |
| 1 | -0.370496 | 2.508460  | -1.197591 |
| 6 | -2.539827 | 2.317461  | 0.168702  |
| 6 | -3.751530 | 2.853517  | -0.589760 |
| 6 | -1.844814 | 3.385290  | 1.010552  |
| 1 | -2.934447 | 1.580178  | 0.891002  |
| 9 | -4.374245 | 1.835781  | -1.196202 |
| 9 | -4.636836 | 3.446766  | 0.212370  |
| 9 | -3.402091 | 3.727379  | -1.533260 |
| 9 | -0.769028 | 2.858043  | 1.605322  |
| 9 | -1.428082 | 4.412917  | 0.264943  |
| 9 | -2.635726 | 3.868466  | 1.969126  |
| 8 | 0.143044  | -1.662511 | 0.303970  |
| 6 | 1.211728  | -2.010325 | -0.483957 |
| 6 | 0.801782  | -3.158273 | -1.398274 |
| 6 | 2.407778  | -2.340872 | 0.404715  |
| 1 | 1.564231  | -1.203688 | -1.153425 |
| 9 | 3.519345  | -2.555175 | -0.304982 |
| 9 | 2.654596  | -1.306352 | 1.218150  |
| 9 | 2.187931  | -3.411891 | 1.167441  |
| 9 | 1.814840  | -3.615740 | -2.137948 |
| 9 | 0.295487  | -4.187553 | -0.716775 |
| 9 | -0.151352 | -2.725637 | -2.233493 |
| 1 | -1.933255 | -2.157537 | -0.155464 |
| 6 | -3.664322 | -1.266727 | 0.253970  |
| 6 | -3.507458 | -1.453786 | 1.761215  |
| 6 | -4.585751 | -2.295153 | -0.400102 |
| 1 | -4.090747 | -0.273820 | 0.067177  |
| 9 | -2.836996 | -0.422547 | 2.279756  |
| 9 | -2.812944 | -2.560635 | 2.030401  |
| 9 | -4.682460 | -1.531329 | 2.372419  |
| 9 | -5.828687 | -2.193306 | 0.055585  |
| 9 | -4.604543 | -2.101882 | -1.714598 |
| 9 | -4.152757 | -3.536480 | -0.169431 |
| 6 | 3.197575  | 2.759410  | -2.421619 |
| 1 | 4.266514  | 2.976563  | -2.502544 |
| 1 | 2.950632  | 1.949360  | -3.117121 |
| 1 | 2.638635  | 3.655603  | -2.705234 |
| 8 | 5.397543  | 0.200374  | 0.357028  |
| 6 | 6.750008  | 0.037206  | 0.894917  |
| 6 | 6.758969  | -1.424403 | 1.303940  |
| 1 | 6.571849  | -2.071621 | 0.438688  |
| 1 | 7.732062  | -1.689426 | 1.732375  |
| 1 | 5.984055  | -1.620247 | 2.054721  |
| 6 | 6.940504  | 0.931499  | 2.105847  |
| 1 | 6.942927  | 1.990896  | 1.835403  |
| 1 | 6.144255  | 0.756496  | 2.839688  |
| 1 | 7.899416  | 0.696483  | 2.583227  |

|   |          |           |           |
|---|----------|-----------|-----------|
| 6 | 7.777491 | 0.294911  | -0.191234 |
| 1 | 7.803972 | 1.346725  | -0.488144 |
| 1 | 8.771940 | 0.015625  | 0.177226  |
| 1 | 7.559977 | -0.316973 | -1.075174 |

-----  
 ---  
 Deprotonation of N-H of the Ligand at the SMD/M06/6-31G\*\* Level of Theory.  
 -----  
 ---

(a')

-----  
 ---  
 Number of imaginary frequencies : 0

Electronic energy : =-1252.743163  
 Zero-point correction= 0.338542  
 Thermal correction to Energy= 0.364708  
 Thermal correction to Enthalpy= 0.365652  
 Thermal correction to Gibbs Free Energy= 0.280840  
 Sum of electronic and zero-point Energies= -1252.404621  
 Sum of electronic and thermal Energies= -1252.378456  
 Sum of electronic and thermal Enthalpies= -1252.377511  
 Sum of electronic and thermal Free Energies= -1252.462323

.....  
 Cartesian Coordinates  
 .....

|    |           |           |           |
|----|-----------|-----------|-----------|
| 46 | -1.072909 | 0.033316  | 0.148350  |
| 6  | 0.890394  | -1.597667 | 1.317537  |
| 6  | 0.063933  | -2.524308 | 0.434891  |
| 8  | -0.804905 | -1.914869 | -0.347053 |
| 8  | 0.172444  | -3.738877 | 0.469119  |
| 1  | 1.926870  | -1.951066 | 1.303167  |
| 7  | 0.808936  | -0.231044 | 0.793190  |
| 6  | 1.761391  | 0.245272  | -0.037525 |
| 8  | 1.598528  | 1.239648  | -0.767454 |
| 6  | -3.780306 | -0.776068 | -0.968086 |
| 6  | -5.189588 | -0.572702 | -1.387991 |
| 1  | -5.844001 | -1.181113 | -0.754585 |
| 1  | -5.467738 | 0.478722  | -1.310665 |
| 1  | -5.316505 | -0.923677 | -2.417173 |
| 8  | -3.084820 | 0.165222  | -0.557866 |
| 8  | -3.364708 | -2.009748 | -1.069337 |
| 1  | -2.412137 | -2.114765 | -0.794522 |
| 8  | 2.917919  | -0.416548 | 0.021319  |
| 6  | 0.358310  | -1.667627 | 2.741564  |
| 1  | 0.404976  | -2.696005 | 3.115576  |
| 1  | 0.956393  | -1.028445 | 3.399236  |

|   |           |           |           |
|---|-----------|-----------|-----------|
| 1 | -0.685181 | -1.328525 | 2.784047  |
| 6 | 4.129917  | 0.036372  | -0.677959 |
| 6 | 3.914666  | 0.009499  | -2.179452 |
| 6 | 4.549210  | 1.399673  | -0.163261 |
| 6 | 5.145490  | -1.016233 | -0.273235 |
| 1 | 3.519822  | -0.965573 | -2.489886 |
| 1 | 3.228857  | 0.791359  | -2.514211 |
| 1 | 4.878941  | 0.157407  | -2.680559 |
| 1 | 4.634459  | 1.385651  | 0.930067  |
| 1 | 5.533507  | 1.650166  | -0.576693 |
| 1 | 3.846562  | 2.184364  | -0.454096 |
| 1 | 6.116003  | -0.792437 | -0.730132 |
| 1 | 5.272840  | -1.036774 | 0.815449  |
| 1 | 4.828854  | -2.011518 | -0.606796 |
| 8 | -1.450532 | 1.959426  | 0.895569  |
| 6 | -1.008973 | 3.049041  | 0.489843  |
| 6 | -1.626750 | 4.325075  | 0.935394  |
| 1 | -0.895126 | 4.890438  | 1.522609  |
| 1 | -1.880644 | 4.931549  | 0.060224  |
| 1 | -2.517421 | 4.135364  | 1.535207  |
| 8 | -0.006250 | 3.182257  | -0.319686 |
| 1 | 0.494376  | 2.315576  | -0.499903 |

-----  
---  
**[a'-b']**  
-----  
---

Total Energy =-1252.742399  
-----  
---

Number of imaginary frequencies : 1  
The smallest frequency is : -880.7091 cm(-1)

Electronic energy : =-1252.7158242  
Zero-point correction= 0.337275  
Thermal correction to Energy= 0.362510  
Thermal correction to Enthalpy= 0.363454  
Thermal correction to Gibbs Free Energy= 0.281913  
Sum of electronic and zero-point Energies= -1252.378550  
Sum of electronic and thermal Energies= -1252.353314  
Sum of electronic and thermal Enthalpies= -1252.352370  
Sum of electronic and thermal Free Energies= -1252.433911

.....  
Cartesian Coordinates  
.....

46 -1.000073 0.071837 -0.042423

S200



|   |           |           |           |
|---|-----------|-----------|-----------|
| 8 | -0.626351 | 3.077748  | 0.731432  |
| 6 | -2.226199 | 4.147448  | -0.645653 |
| 6 | -1.511174 | 2.923534  | -0.153741 |
| 8 | -1.853949 | 1.819881  | -0.682619 |
| 6 | 0.895868  | 0.146752  | 2.027672  |
| 6 | 0.678062  | -1.342518 | 1.741275  |
| 8 | -0.135141 | -1.587173 | 0.718585  |
| 8 | 1.167853  | -2.211189 | 2.421951  |
| 1 | 1.937516  | 0.270012  | 2.344616  |
| 1 | -1.538711 | 4.716793  | -1.279760 |
| 1 | -3.113444 | 3.883169  | -1.222476 |
| 1 | -2.489804 | 4.782289  | 0.204226  |
| 7 | 0.648426  | 0.953359  | 0.813961  |
| 1 | 0.105884  | 2.038093  | 0.875715  |
| 6 | 1.629345  | 0.923895  | -0.215113 |
| 8 | 1.570001  | 1.655109  | -1.175385 |
| 6 | -2.856412 | -2.181437 | -0.772790 |
| 6 | -4.070816 | -2.786046 | -1.393165 |
| 1 | -4.653504 | -3.299136 | -0.622179 |
| 1 | -4.673860 | -2.017154 | -1.875510 |
| 1 | -3.765472 | -3.542418 | -2.122472 |
| 8 | -2.654673 | -0.961055 | -0.850117 |
| 8 | -2.083753 | -3.042071 | -0.178170 |
| 1 | -1.272523 | -2.620706 | 0.239027  |
| 8 | 2.553068  | 0.006067  | 0.045649  |
| 6 | 3.474057  | -0.469990 | -0.993482 |
| 6 | 2.660388  | -1.023529 | -2.149959 |
| 6 | 4.414777  | 0.643239  | -1.413633 |
| 6 | 4.220404  | -1.580828 | -0.278703 |
| 1 | 1.964384  | -1.790510 | -1.787168 |
| 1 | 2.095100  | -0.237466 | -2.658628 |
| 1 | 3.335144  | -1.490187 | -2.877029 |
| 1 | 4.926521  | 1.059315  | -0.538238 |
| 1 | 5.175817  | 0.233823  | -2.088641 |
| 1 | 3.881337  | 1.445387  | -1.928366 |
| 1 | 4.925792  | -2.059679 | -0.966892 |
| 1 | 4.781505  | -1.183183 | 0.574112  |
| 1 | 3.519148  | -2.336170 | 0.094049  |
| 6 | -0.035590 | 0.597498  | 3.141908  |
| 1 | 0.151924  | -0.001210 | 4.038187  |
| 1 | 0.126410  | 1.654012  | 3.379164  |
| 1 | -1.087473 | 0.470226  | 2.853672  |

-----  
---  
**[b']**  
-----  
---

Number of imaginary frequencies : 0

Electronic energy : =-1252.7520843  
Zero-point correction= 0.339904  
Thermal correction to Energy= 0.366026  
Thermal correction to Enthalpy= 0.366971  
Thermal correction to Gibbs Free Energy= 0.282395  
Sum of electronic and zero-point Energies= -1252.412180  
Sum of electronic and thermal Energies= -1252.386058  
Sum of electronic and thermal Enthalpies= -1252.385114  
Sum of electronic and thermal Free Energies= -1252.469689

.....  
Cartesian Coordinates  
.....

|    |           |           |           |
|----|-----------|-----------|-----------|
| 46 | -0.923209 | 0.058553  | -0.010039 |
| 8  | -0.909684 | 3.031852  | 1.041083  |
| 6  | -2.204988 | 4.094615  | -0.661355 |
| 6  | -1.547274 | 2.906606  | -0.013002 |
| 8  | -1.703572 | 1.807081  | -0.679318 |
| 6  | 0.951289  | -0.114288 | 2.137932  |
| 6  | 0.698230  | -1.547259 | 1.683726  |
| 8  | -0.119674 | -1.687303 | 0.667395  |
| 8  | 1.194127  | -2.490688 | 2.274870  |
| 1  | 1.992958  | -0.033433 | 2.469033  |
| 1  | -1.524144 | 4.495291  | -1.421687 |
| 1  | -3.136466 | 3.813955  | -1.159603 |
| 1  | -2.390220 | 4.874987  | 0.080953  |
| 7  | 0.718227  | 0.826570  | 1.012392  |
| 1  | 0.343049  | 1.757142  | 1.285783  |
| 6  | 1.725389  | 0.970578  | 0.004753  |
| 8  | 1.765180  | 1.951209  | -0.701886 |
| 6  | -2.927570 | -1.996127 | -0.912370 |
| 6  | -4.157207 | -2.467493 | -1.594860 |
| 1  | -4.849450 | -2.868947 | -0.846998 |
| 1  | -4.631754 | -1.653552 | -2.143369 |
| 1  | -3.901695 | -3.286410 | -2.274899 |
| 8  | -2.569697 | -0.807813 | -0.988576 |
| 8  | -2.289744 | -2.919906 | -0.250686 |
| 1  | -1.457788 | -2.580843 | 0.179619  |
| 6  | 0.005817  | 0.233706  | 3.274329  |
| 1  | 0.161881  | -0.459834 | 4.106144  |
| 1  | 0.191290  | 1.252519  | 3.631037  |
| 1  | -1.040320 | 0.161774  | 2.949389  |
| 8  | 2.494844  | -0.093080 | -0.012369 |
| 6  | 3.384571  | -0.387961 | -1.163526 |
| 6  | 2.529303  | -0.475832 | -2.410627 |
| 6  | 4.476164  | 0.657630  | -1.248446 |
| 6  | 3.944981  | -1.743910 | -0.790515 |

|   |          |           |           |
|---|----------|-----------|-----------|
| 1 | 1.696848 | -1.172518 | -2.246143 |
| 1 | 2.125893 | 0.497517  | -2.705955 |
| 1 | 3.137629 | -0.857917 | -3.238369 |
| 1 | 4.995045 | 0.749744  | -0.287111 |
| 1 | 5.208426 | 0.342612  | -2.001131 |
| 1 | 4.085444 | 1.637078  | -1.537526 |
| 1 | 4.634805 | -2.085497 | -1.570031 |
| 1 | 4.491718 | -1.692698 | 0.158074  |
| 1 | 3.140419 | -2.482788 | -0.692493 |

-----  
 ---  
 Different Possibilities of Pd(OAc)<sub>2</sub> -Ligand with Substrate at the SMD/M06/6-31G\*\* Level of Theory  
 -----  
 ---

(3a')

-----  
 ---  
 Number of imaginary frequencies : 0

Electronic energy :        =-2241.8624641  
 Zero-point correction=        0.501014  
 Thermal correction to Energy=        0.539162  
 Thermal correction to Enthalpy=        0.540106  
 Thermal correction to Gibbs Free Energy=        0.428812  
 Sum of electronic and zero-point Energies=        -2241.361451  
 Sum of electronic and thermal Energies=        -2241.323302  
 Sum of electronic and thermal Enthalpies=        -2241.322358  
 Sum of electronic and thermal Free Energies=        -2241.433653

-----  
 Cartesian Coordinates  
 -----

|    |           |           |           |
|----|-----------|-----------|-----------|
| 46 | -3.315336 | -1.061174 | -0.141096 |
| 6  | 1.685687  | 0.609611  | -1.215236 |
| 1  | 1.090241  | -0.025638 | -0.546074 |
| 1  | 1.745065  | 0.122244  | -2.197188 |
| 8  | -0.618076 | 1.609814  | -2.123974 |
| 6  | -0.488406 | 3.438678  | 0.369863  |
| 6  | -1.855254 | 3.219729  | 0.607230  |
| 6  | 0.053008  | 4.706791  | 0.475179  |
| 6  | -2.681579 | 4.293402  | 0.958081  |
| 6  | -0.780347 | 5.768275  | 0.819360  |
| 1  | 1.115731  | 4.849313  | 0.299709  |
| 6  | -2.137160 | 5.564672  | 1.060724  |
| 1  | -3.736967 | 4.114824  | 1.143725  |
| 1  | -0.359377 | 6.766504  | 0.905500  |
| 1  | -2.773444 | 6.401799  | 1.332744  |

|    |           |           |           |
|----|-----------|-----------|-----------|
| 6  | -2.385214 | 1.910786  | 0.466085  |
| 7  | -2.810065 | 0.843528  | 0.322220  |
| 6  | -5.233721 | -2.304546 | -1.003185 |
| 8  | -5.289802 | -1.040901 | -0.834339 |
| 6  | -6.390609 | -3.083790 | -1.486265 |
| 1  | -6.864002 | -3.581593 | -0.632029 |
| 1  | -7.121507 | -2.426728 | -1.963183 |
| 1  | -6.055461 | -3.857306 | -2.183156 |
| 8  | -4.122481 | -2.870178 | -0.713586 |
| 6  | 0.248236  | -1.864552 | 2.022986  |
| 6  | -1.212060 | -1.721720 | 1.610787  |
| 8  | -1.398761 | -1.523217 | 0.343389  |
| 8  | -2.083826 | -1.742275 | 2.474575  |
| 1  | 0.320572  | -2.761509 | 2.655443  |
| 7  | 1.096455  | -2.002583 | 0.855087  |
| 1  | 0.643434  | -2.082908 | -0.047136 |
| 6  | 2.409452  | -2.332813 | 0.937700  |
| 8  | 3.016148  | -2.490681 | 1.987830  |
| 8  | 0.319767  | 2.349179  | 0.092267  |
| 16 | 0.630988  | 2.026115  | -1.504447 |
| 8  | 1.347271  | 3.160382  | -2.062849 |
| 6  | 3.027573  | 0.975583  | -0.667432 |
| 6  | 4.060901  | 1.327202  | -1.540043 |
| 6  | 3.256370  | 0.983847  | 0.709608  |
| 6  | 5.307965  | 1.685045  | -1.039467 |
| 1  | 3.880695  | 1.318743  | -2.614624 |
| 6  | 4.505633  | 1.338234  | 1.208738  |
| 1  | 2.450772  | 0.713961  | 1.390141  |
| 6  | 5.530817  | 1.691765  | 0.335876  |
| 1  | 6.107825  | 1.958115  | -1.723839 |
| 1  | 4.677947  | 1.336647  | 2.282612  |
| 1  | 6.506807  | 1.970607  | 0.726952  |
| 6  | 0.592646  | -0.631310 | 2.851893  |
| 1  | 0.403727  | 0.279587  | 2.266015  |
| 1  | -0.028775 | -0.598116 | 3.751884  |
| 1  | 1.643636  | -0.653098 | 3.154369  |
| 8  | 2.923867  | -2.430743 | -0.298956 |
| 6  | 4.266273  | -2.970350 | -0.534477 |
| 6  | 4.357384  | -4.385475 | 0.006816  |
| 1  | 4.333105  | -4.409297 | 1.099730  |
| 1  | 3.533254  | -4.997858 | -0.379100 |
| 1  | 5.299533  | -4.838485 | -0.324268 |
| 6  | 5.324459  | -2.055677 | 0.052186  |
| 1  | 5.258560  | -2.000952 | 1.142281  |
| 1  | 6.315769  | -2.441745 | -0.215715 |
| 1  | 5.233304  | -1.044589 | -0.364620 |
| 6  | 4.353540  | -2.972734 | -2.049368 |
| 1  | 4.223439  | -1.957607 | -2.446164 |
| 1  | 5.333923  | -3.342942 | -2.369907 |

1 3.580673 -3.617386 -2.484373

-----  
---  
**(3b')**  
-----  
---

Number of imaginary frequencies : 0

Electronic energy : =-2241.8623509  
Zero-point correction= 0.502356  
Thermal correction to Energy= 0.539798  
Thermal correction to Enthalpy= 0.540742  
Thermal correction to Gibbs Free Energy= 0.433034  
Sum of electronic and zero-point Energies= -2241.359995  
Sum of electronic and thermal Energies= -2241.322553  
Sum of electronic and thermal Enthalpies= -2241.321608  
Sum of electronic and thermal Free Energies= -2241.429317

.....  
Cartesian Coordinates  
.....

|    |           |           |           |
|----|-----------|-----------|-----------|
| 46 | 0.772144  | -1.808933 | -0.587727 |
| 6  | -2.883159 | -0.306052 | 1.234545  |
| 1  | -1.853890 | -0.532211 | 0.929075  |
| 1  | -2.993267 | -0.564021 | 2.295722  |
| 8  | -1.840415 | 2.046966  | 1.938516  |
| 6  | -1.953818 | 2.807075  | -0.760037 |
| 6  | -0.622050 | 2.554802  | -1.120998 |
| 6  | -2.474905 | 4.084993  | -0.815349 |
| 6  | 0.198234  | 3.605317  | -1.547546 |
| 6  | -1.652069 | 5.124742  | -1.243066 |
| 1  | -3.511804 | 4.251526  | -0.533768 |
| 6  | -0.328035 | 4.887732  | -1.606990 |
| 1  | 1.235081  | 3.403484  | -1.803053 |
| 1  | -2.053611 | 6.133430  | -1.292219 |
| 1  | 0.300232  | 5.710559  | -1.935517 |
| 6  | -0.145187 | 1.222294  | -1.011361 |
| 7  | 0.182146  | 0.117685  | -0.889129 |
| 6  | -0.165542 | -3.842450 | 0.402680  |
| 8  | -0.824456 | -2.747788 | 0.384337  |
| 6  | -0.687460 | -5.056500 | 1.061920  |
| 1  | -0.347651 | -5.060549 | 2.104328  |
| 1  | -1.780339 | -5.055406 | 1.055032  |
| 1  | -0.298183 | -5.952407 | 0.571371  |
| 8  | 0.986152  | -3.824540 | -0.150075 |
| 6  | 4.673184  | -0.428593 | -1.349222 |
| 6  | 3.576151  | -1.396598 | -0.871826 |

S205

|    |           |           |           |
|----|-----------|-----------|-----------|
| 8  | 2.462514  | -1.211379 | -1.519044 |
| 8  | 3.777490  | -2.229675 | 0.002991  |
| 1  | 4.850480  | -0.666981 | -2.405971 |
| 7  | 4.180483  | 0.945584  | -1.336001 |
| 1  | 4.170875  | 1.472215  | -2.198797 |
| 6  | 3.507883  | 1.524633  | -0.308419 |
| 8  | 3.039082  | 2.656308  | -0.357360 |
| 8  | -2.741163 | 1.731534  | -0.390061 |
| 16 | -2.978756 | 1.481820  | 1.232085  |
| 8  | -4.319379 | 1.947737  | 1.540243  |
| 6  | -3.914351 | -0.953822 | 0.368023  |
| 6  | -5.208743 | -1.153991 | 0.851850  |
| 6  | -3.590632 | -1.353182 | -0.930580 |
| 6  | -6.170045 | -1.753107 | 0.045948  |
| 1  | -5.457120 | -0.840114 | 1.864990  |
| 6  | -4.553043 | -1.954651 | -1.733943 |
| 1  | -2.579449 | -1.195573 | -1.306832 |
| 6  | -5.842460 | -2.153646 | -1.246873 |
| 1  | -7.175782 | -1.909631 | 0.429202  |
| 1  | -4.295795 | -2.268016 | -2.743205 |
| 1  | -6.593727 | -2.625504 | -1.876391 |
| 6  | 5.965355  | -0.593378 | -0.573968 |
| 1  | 6.332151  | -1.622008 | -0.649279 |
| 1  | 6.730456  | 0.077369  | -0.978975 |
| 1  | 5.822147  | -0.359314 | 0.486859  |
| 8  | 3.431860  | 0.689618  | 0.732509  |
| 6  | 2.939911  | 1.088801  | 2.051658  |
| 6  | 3.170713  | -0.168727 | 2.869076  |
| 1  | 4.235794  | -0.431192 | 2.888185  |
| 1  | 2.829550  | -0.016798 | 3.899433  |
| 1  | 2.616998  | -1.013807 | 2.438963  |
| 6  | 3.773353  | 2.239408  | 2.581690  |
| 1  | 3.600263  | 3.160654  | 2.018946  |
| 1  | 3.514893  | 2.423306  | 3.631222  |
| 1  | 4.840806  | 1.989773  | 2.533289  |
| 6  | 1.459528  | 1.412180  | 1.992970  |
| 1  | 1.250702  | 2.276384  | 1.353664  |
| 1  | 0.901218  | 0.543907  | 1.618883  |
| 1  | 1.101708  | 1.635890  | 3.005289  |

-----  
---  
**(3d')**  
-----  
---

Number of imaginary frequencies : 0

Electronic energy :       =-2241.8592016  
 Zero-point correction=           0.501995  
 Thermal correction to Energy=       0.539325  
 Thermal correction to Enthalpy=     0.540269  
 Thermal correction to Gibbs Free Energy=   0.433902  
 Sum of electronic and zero-point Energies=   -2241.357207  
 Sum of electronic and thermal Energies=   -2241.319877  
 Sum of electronic and thermal Enthalpies=   -2241.318933  
 Sum of electronic and thermal Free Energies=   -2241.425299

.....  
 Cartesian Coordinates  
 .....

|    |           |           |           |
|----|-----------|-----------|-----------|
| 46 | 1.279742  | 1.901073  | 0.367655  |
| 6  | -1.534194 | -1.347655 | -1.797935 |
| 1  | -0.459009 | -1.145118 | -1.708631 |
| 1  | -1.689008 | -2.037041 | -2.639951 |
| 8  | -0.820619 | -3.210176 | -0.033280 |
| 6  | -3.166174 | -0.595133 | 1.213658  |
| 6  | -2.966592 | 0.773167  | 1.469784  |
| 6  | -4.418910 | -1.159900 | 1.392592  |
| 6  | -4.042329 | 1.586273  | 1.843053  |
| 6  | -5.480722 | -0.337159 | 1.759774  |
| 1  | -4.565253 | -2.223444 | 1.244168  |
| 6  | -5.303317 | 1.027491  | 1.975692  |
| 1  | -3.868738 | 2.643462  | 2.024576  |
| 1  | -6.464948 | -0.780494 | 1.888349  |
| 1  | -6.145768 | 1.650839  | 2.260555  |
| 6  | -1.662838 | 1.306796  | 1.317834  |
| 7  | -0.579662 | 1.694618  | 1.179670  |
| 6  | 2.781006  | 3.629117  | -0.560910 |
| 8  | 1.650677  | 3.962532  | -0.080437 |
| 6  | 3.693271  | 4.621545  | -1.176617 |
| 1  | 3.583720  | 4.571079  | -2.266205 |
| 1  | 3.445253  | 5.632744  | -0.845536 |
| 1  | 4.732111  | 4.381373  | -0.933421 |
| 8  | 3.102379  | 2.392006  | -0.521042 |
| 8  | -2.035217 | -1.321182 | 0.883584  |
| 16 | -1.954880 | -2.378927 | -0.387360 |
| 8  | -3.263904 | -2.976300 | -0.590439 |
| 6  | -2.331437 | -0.085588 | -1.908065 |
| 6  | -3.720648 | -0.096126 | -2.064461 |
| 6  | -1.655292 | 1.133932  | -1.843388 |
| 6  | -4.422618 | 1.102463  | -2.124652 |
| 1  | -4.253688 | -1.043591 | -2.128083 |
| 6  | -2.358721 | 2.332346  | -1.914833 |
| 1  | -0.570000 | 1.136946  | -1.732600 |
| 6  | -3.744119 | 2.317873  | -2.047881 |
| 1  | -5.504784 | 1.087426  | -2.232742 |
| 1  | -1.818775 | 3.275977  | -1.855340 |

|   |           |           |           |
|---|-----------|-----------|-----------|
| 1 | -4.297425 | 3.253263  | -2.095777 |
| 7 | 1.398396  | -0.089000 | 0.606555  |
| 6 | 1.754757  | -0.765458 | -0.509373 |
| 8 | 1.664658  | -0.311225 | -1.652840 |
| 6 | 1.843273  | -0.536150 | 1.919460  |
| 1 | 1.742840  | 0.333924  | 2.589237  |
| 6 | 3.341545  | -0.802689 | 1.891273  |
| 8 | 4.126541  | -0.166787 | 1.218160  |
| 8 | 3.718417  | -1.777919 | 2.718971  |
| 1 | 4.688722  | -1.846990 | 2.676764  |
| 6 | 1.005731  | -1.657068 | 2.518059  |
| 1 | 1.278289  | -1.814159 | 3.566862  |
| 1 | -0.055928 | -1.386619 | 2.478190  |
| 1 | 1.149105  | -2.598806 | 1.980248  |
| 8 | 2.156706  | -2.014722 | -0.218873 |
| 6 | 2.777945  | -2.901915 | -1.202200 |
| 6 | 3.060259  | -4.141088 | -0.372051 |
| 1 | 3.571966  | -4.897407 | -0.978150 |
| 1 | 3.695313  | -3.894365 | 0.488574  |
| 1 | 2.122775  | -4.572117 | 0.002441  |
| 6 | 1.819137  | -3.231620 | -2.332057 |
| 1 | 0.870220  | -3.612316 | -1.932835 |
| 1 | 1.616231  | -2.364417 | -2.965889 |
| 1 | 2.262667  | -4.018123 | -2.955300 |
| 6 | 4.067720  | -2.273331 | -1.694183 |
| 1 | 3.877502  | -1.369108 | -2.280053 |
| 1 | 4.711574  | -2.011484 | -0.845006 |
| 1 | 4.606336  | -2.987801 | -2.328267 |

-----  
 ---  
 (3e')  
 -----  
 ---

Number of imaginary frequencies : 0

Electronic energy :        =-2241.8661439  
 Zero-point correction=        0.497492  
 Thermal correction to Energy=        0.535202  
 Thermal correction to Enthalpy=        0.536146  
 Thermal correction to Gibbs Free Energy=        0.425944  
 Sum of electronic and zero-point Energies=        -2241.368652  
 Sum of electronic and thermal Energies=        -2241.330942  
 Sum of electronic and thermal Enthalpies=        -2241.329998  
 Sum of electronic and thermal Free Energies=        -2241.440200

.....  
 Cartesian Coordinates



.....

|    |           |           |           |
|----|-----------|-----------|-----------|
| 46 | -1.136885 | -1.068199 | 0.038285  |
| 6  | 3.214207  | 1.799260  | -0.981975 |
| 1  | 3.971517  | 1.703586  | -1.768600 |
| 1  | 2.208756  | 1.665091  | -1.408186 |
| 8  | 2.388737  | 0.246849  | 1.047588  |
| 6  | 3.868156  | -2.028784 | -0.689517 |
| 6  | 2.976601  | -3.001491 | -0.209397 |
| 6  | 5.204166  | -2.332230 | -0.880081 |
| 6  | 3.437735  | -4.289643 | 0.084619  |
| 6  | 5.653159  | -3.616426 | -0.582843 |
| 1  | 5.875747  | -1.570735 | -1.266155 |
| 6  | 4.778833  | -4.588667 | -0.102030 |
| 1  | 2.738760  | -5.035553 | 0.452322  |
| 1  | 6.701867  | -3.858834 | -0.733711 |
| 1  | 5.143694  | -5.586685 | 0.123061  |
| 6  | 1.612186  | -2.645628 | -0.055931 |
| 7  | 0.509930  | -2.306780 | 0.049469  |
| 6  | -1.831142 | 1.681497  | -0.332695 |
| 6  | -0.527962 | 1.440172  | -1.073810 |
| 8  | -0.064664 | 0.221046  | -1.078791 |
| 8  | 0.074894  | 2.366728  | -1.608803 |
| 1  | -2.451943 | 2.333143  | -0.959607 |
| 7  | -2.498319 | 0.394633  | -0.135302 |
| 6  | -3.811592 | 0.294154  | -0.167957 |
| 8  | -4.456815 | -0.799184 | -0.154436 |
| 8  | 3.370986  | -0.781667 | -1.034890 |
| 16 | 3.488122  | 0.414617  | 0.109015  |
| 8  | 4.849803  | 0.407362  | 0.621193  |
| 6  | 3.347543  | 3.065314  | -0.191246 |
| 6  | 2.258621  | 3.552756  | 0.534450  |
| 6  | 4.570348  | 3.737149  | -0.138330 |
| 6  | 2.386683  | 4.712268  | 1.290223  |
| 1  | 1.310746  | 3.019657  | 0.492651  |
| 6  | 4.695594  | 4.898803  | 0.615903  |
| 1  | 5.421003  | 3.347629  | -0.696120 |
| 6  | 3.604163  | 5.387352  | 1.330112  |
| 1  | 1.532343  | 5.089652  | 1.848411  |
| 1  | 5.647821  | 5.423481  | 0.647391  |
| 1  | 3.702697  | 6.297141  | 1.918256  |
| 8  | -2.060073 | -2.405621 | 1.345981  |
| 6  | -2.918606 | -3.230648 | 0.924370  |
| 8  | -3.659724 | -3.026823 | -0.087972 |
| 6  | -3.088585 | -4.518970 | 1.657739  |
| 1  | -4.111358 | -4.582137 | 2.043682  |
| 1  | -2.958462 | -5.345787 | 0.951213  |
| 1  | -2.373374 | -4.615787 | 2.475993  |
| 1  | -3.922762 | -1.853790 | -0.200274 |
| 6  | -1.531636 | 2.382155  | 0.986754  |

|   |           |           |           |
|---|-----------|-----------|-----------|
| 1 | -1.065161 | 3.357468  | 0.805232  |
| 1 | -2.458015 | 2.541609  | 1.548740  |
| 1 | -0.852607 | 1.773592  | 1.600340  |
| 8 | -4.468454 | 1.445393  | -0.207805 |
| 6 | -5.931933 | 1.555660  | -0.369570 |
| 6 | -6.364282 | 0.927593  | -1.679934 |
| 1 | -6.275394 | -0.161717 | -1.670158 |
| 1 | -7.414671 | 1.181838  | -1.865923 |
| 1 | -5.768777 | 1.326346  | -2.509944 |
| 6 | -6.636410 | 0.965459  | 0.836596  |
| 1 | -7.700863 | 1.224482  | 0.787711  |
| 1 | -6.551703 | -0.123121 | 0.878036  |
| 1 | -6.228822 | 1.389074  | 1.762473  |
| 6 | -6.127128 | 3.059544  | -0.411059 |
| 1 | -5.767213 | 3.523353  | 0.514763  |
| 1 | -5.586223 | 3.500776  | -1.256323 |
| 1 | -7.191936 | 3.291999  | -0.522678 |

-----  
 ---  
**(3f')**  
 -----  
 ---

Number of imaginary frequencies : 0

Electronic energy :       =-2241.8659347  
 Zero-point correction=               0.499733  
 Thermal correction to Energy=       0.537712  
 Thermal correction to Enthalpy=     0.538656  
 Thermal correction to Gibbs Free Energy=   0.428102  
 Sum of electronic and zero-point Energies=   -2241.366202  
 Sum of electronic and thermal Energies=   -2241.328223  
 Sum of electronic and thermal Enthalpies=   -2241.327279  
 Sum of electronic and thermal Free Energies=   -2241.437833

-----  
 Cartesian Coordinates  
 -----

|    |           |           |           |
|----|-----------|-----------|-----------|
| 46 | -0.888123 | -1.133358 | -0.197258 |
| 6  | 2.822931  | 2.116924  | -0.804038 |
| 1  | 3.542223  | 2.419136  | -1.573296 |
| 1  | 1.934692  | 1.677652  | -1.276940 |
| 8  | 2.726882  | 0.239149  | 1.111870  |
| 6  | 4.269818  | -1.513166 | -0.882623 |
| 6  | 3.451208  | -2.599267 | -0.532480 |
| 6  | 5.638569  | -1.669751 | -1.004050 |
| 6  | 4.020877  | -3.856768 | -0.308488 |
| 6  | 6.195483  | -2.925432 | -0.774368 |

S210

|    |           |           |           |
|----|-----------|-----------|-----------|
| 1  | 6.249572  | -0.815847 | -1.283399 |
| 6  | 5.394165  | -4.011559 | -0.430487 |
| 1  | 3.381487  | -4.693359 | -0.041421 |
| 1  | 7.270251  | -3.054967 | -0.869873 |
| 1  | 5.842464  | -4.986061 | -0.259235 |
| 6  | 2.055789  | -2.377063 | -0.396582 |
| 7  | 0.930366  | -2.133829 | -0.273296 |
| 6  | -2.122490 | 1.414364  | -0.899899 |
| 6  | -0.704734 | 1.406262  | -1.422647 |
| 8  | -0.007515 | 0.309209  | -1.257133 |
| 8  | -0.218187 | 2.387502  | -1.971203 |
| 1  | -2.754050 | 1.659927  | -1.764808 |
| 7  | -2.472131 | 0.094122  | -0.375438 |
| 6  | -3.740872 | -0.318764 | -0.401152 |
| 8  | -4.120358 | -1.435138 | 0.013001  |
| 8  | 3.674253  | -0.291100 | -1.158895 |
| 16 | 3.608249  | 0.791840  | 0.093677  |
| 8  | 4.970444  | 1.137932  | 0.470426  |
| 6  | 2.485181  | 3.216884  | 0.154100  |
| 6  | 1.306047  | 3.147866  | 0.899952  |
| 6  | 3.357768  | 4.290414  | 0.334185  |
| 6  | 0.990605  | 4.159217  | 1.799233  |
| 1  | 0.644698  | 2.290272  | 0.774298  |
| 6  | 3.040593  | 5.301873  | 1.235229  |
| 1  | 4.282325  | 4.330701  | -0.240496 |
| 6  | 1.856536  | 5.238203  | 1.964858  |
| 1  | 0.067718  | 4.106742  | 2.372927  |
| 1  | 3.719978  | 6.140595  | 1.368150  |
| 1  | 1.607742  | 6.031548  | 2.666264  |
| 8  | -1.440862 | -2.760429 | 1.078305  |
| 6  | -2.145005 | -2.809939 | 2.101616  |
| 8  | -3.224724 | -2.111615 | 2.273452  |
| 6  | -1.799616 | -3.717675 | 3.226761  |
| 1  | -1.790024 | -3.144654 | 4.159922  |
| 1  | -2.577410 | -4.482563 | 3.324262  |
| 1  | -0.829880 | -4.190134 | 3.066180  |
| 1  | -3.538371 | -1.742588 | 1.372730  |
| 6  | -2.285522 | 2.497265  | 0.157013  |
| 1  | -3.336549 | 2.572543  | 0.458339  |
| 1  | -1.688411 | 2.252475  | 1.045331  |
| 1  | -1.960267 | 3.468036  | -0.233779 |
| 8  | -4.589661 | 0.581466  | -0.911187 |
| 6  | -6.041971 | 0.502077  | -0.708533 |
| 6  | -6.355204 | 0.459513  | 0.775636  |
| 1  | -7.435591 | 0.578305  | 0.919891  |
| 1  | -6.051838 | -0.484223 | 1.236508  |
| 1  | -5.851656 | 1.284916  | 1.295600  |
| 6  | -6.519818 | 1.810986  | -1.310238 |
| 1  | -6.255062 | 1.869838  | -2.372431 |

|   |           |           |           |
|---|-----------|-----------|-----------|
| 1 | -7.609178 | 1.888469  | -1.221205 |
| 1 | -6.067145 | 2.664666  | -0.790884 |
| 6 | -6.621440 | -0.673844 | -1.471828 |
| 1 | -6.300801 | -0.642231 | -2.520273 |
| 1 | -6.322086 | -1.632195 | -1.040545 |
| 1 | -7.716338 | -0.611570 | -1.451757 |

-----  
 ---  
 (3g')  
 -----  
 ---

Number of imaginary frequencies : 0

Electronic energy : =-3031.4115565  
 Zero-point correction= 0.564946  
 Thermal correction to Energy= 0.613326  
 Thermal correction to Enthalpy= 0.614270  
 Thermal correction to Gibbs Free Energy= 0.479569  
 Sum of electronic and zero-point Energies= -3030.846610  
 Sum of electronic and thermal Energies= -3030.798231  
 Sum of electronic and thermal Enthalpies= -3030.797286  
 Sum of electronic and thermal Free Energies= -3030.931987

.....  
 Cartesian Coordinates  
 .....

|    |           |           |           |
|----|-----------|-----------|-----------|
| 46 | -2.138915 | -1.000159 | -0.164067 |
| 6  | 1.721160  | 1.841974  | -2.458786 |
| 1  | 2.222683  | 1.785104  | -3.431462 |
| 1  | 0.633154  | 1.733711  | -2.586349 |
| 8  | 1.525234  | 0.220936  | -0.320496 |
| 6  | 2.312822  | -2.013774 | -2.526652 |
| 6  | 1.618995  | -2.994838 | -1.800660 |
| 6  | 3.499352  | -2.316183 | -3.169028 |
| 6  | 2.130670  | -4.294557 | -1.721210 |
| 6  | 4.001170  | -3.611928 | -3.080118 |
| 1  | 4.013644  | -1.543079 | -3.732740 |
| 6  | 3.324151  | -4.594281 | -2.361027 |
| 1  | 1.585626  | -5.050393 | -1.163113 |
| 1  | 4.932522  | -3.855205 | -3.584700 |
| 1  | 3.726445  | -5.601485 | -2.303060 |
| 6  | 0.396487  | -2.634036 | -1.177549 |
| 7  | -0.592239 | -2.280207 | -0.689097 |
| 6  | -2.929281 | 1.742557  | -0.319223 |
| 6  | -1.914253 | 1.496999  | -1.421387 |
| 8  | -1.494379 | 0.269645  | -1.580645 |
| 8  | -1.491074 | 2.416801  | -2.116129 |

|    |           |           |           |
|----|-----------|-----------|-----------|
| 1  | -3.732090 | 2.351498  | -0.752757 |
| 7  | -3.462672 | 0.456858  | 0.122693  |
| 6  | -4.772974 | 0.250002  | 0.285550  |
| 8  | -5.311807 | -0.868219 | 0.369646  |
| 8  | 1.752000  | -0.747426 | -2.643621 |
| 16 | 2.258090  | 0.395333  | -1.565238 |
| 8  | 3.716950  | 0.324853  | -1.512907 |
| 6  | 2.101312  | 3.049667  | -1.658097 |
| 6  | 1.237206  | 3.521956  | -0.668673 |
| 6  | 3.339974  | 3.664905  | -1.849772 |
| 6  | 1.601857  | 4.611939  | 0.112687  |
| 1  | 0.276265  | 3.031590  | -0.524984 |
| 6  | 3.702184  | 4.756370  | -1.067424 |
| 1  | 4.016244  | 3.287332  | -2.615769 |
| 6  | 2.834081  | 5.229558  | -0.086143 |
| 1  | 0.921260  | 4.979814  | 0.877924  |
| 1  | 4.665390  | 5.237545  | -1.221838 |
| 1  | 3.119034  | 6.083404  | 0.524862  |
| 8  | -2.590815 | -2.296401 | 1.451206  |
| 6  | -3.397756 | -3.240759 | 1.379932  |
| 8  | -4.429072 | -3.243074 | 0.590658  |
| 6  | -3.238478 | -4.453767 | 2.220249  |
| 1  | -4.084077 | -4.521481 | 2.913217  |
| 1  | -3.271958 | -5.342522 | 1.581312  |
| 1  | -2.301020 | -4.423806 | 2.776344  |
| 1  | -4.646040 | -2.291509 | 0.306469  |
| 1  | 4.873428  | 0.038581  | -0.061911 |
| 8  | 5.209788  | -0.105396 | 0.840392  |
| 6  | 4.115850  | -0.181380 | 1.692088  |
| 6  | 3.717768  | 1.211126  | 2.173593  |
| 6  | 4.508702  | -1.109262 | 2.829468  |
| 1  | 3.219953  | -0.616496 | 1.223245  |
| 9  | 2.536087  | 1.197810  | 2.793315  |
| 9  | 3.620524  | 2.034967  | 1.128298  |
| 9  | 4.617279  | 1.733593  | 3.011235  |
| 9  | 3.590579  | -1.112093 | 3.798582  |
| 9  | 5.678113  | -0.768901 | 3.371096  |
| 9  | 4.627225  | -2.354886 | 2.368517  |
| 6  | -2.275773 | 2.512771  | 0.820094  |
| 1  | -1.909657 | 3.485965  | 0.471982  |
| 1  | -3.007260 | 2.681527  | 1.618276  |
| 1  | -1.431689 | 1.943298  | 1.234103  |
| 8  | -5.471428 | 1.391328  | 0.383643  |
| 6  | -6.936327 | 1.419375  | 0.467177  |
| 6  | -7.231845 | 2.908171  | 0.448189  |
| 1  | -6.881561 | 3.362436  | -0.486326 |
| 1  | -8.311584 | 3.076088  | 0.529695  |
| 1  | -6.738856 | 3.414238  | 1.286649  |
| 6  | -7.552553 | 0.747110  | -0.745574 |

|   |           |           |           |
|---|-----------|-----------|-----------|
| 1 | -7.124508 | 1.158771  | -1.667950 |
| 1 | -7.402514 | -0.335297 | -0.739266 |
| 1 | -8.630906 | 0.946605  | -0.756100 |
| 6 | -7.394286 | 0.806961  | 1.777704  |
| 1 | -7.200374 | -0.267751 | 1.817489  |
| 1 | -6.886437 | 1.290037  | 2.621411  |
| 1 | -8.472796 | 0.968094  | 1.895242  |

-----  
 ---  
 (3h')  
 -----  
 ---

Number of imaginary frequencies : 0

Electronic energy : =-2802.4346333  
 Zero-point correction= 0.505682  
 Thermal correction to Energy= 0.546977  
 Thermal correction to Enthalpy= 0.547922  
 Thermal correction to Gibbs Free Energy= 0.431517  
 Sum of electronic and zero-point Energies= -2801.928951  
 Sum of electronic and thermal Energies= -2801.887656  
 Sum of electronic and thermal Enthalpies= -2801.886712  
 Sum of electronic and thermal Free Energies= -2802.003116

.....  
 Cartesian Coordinates  
 .....

|    |           |           |           |
|----|-----------|-----------|-----------|
| 46 | -0.629885 | -0.212333 | -0.919012 |
| 6  | 3.389380  | 2.126653  | -0.601266 |
| 1  | 4.063425  | 2.472805  | -1.393429 |
| 1  | 2.477292  | 1.702850  | -1.047986 |
| 8  | 3.398762  | 0.135734  | 1.202349  |
| 6  | 4.507547  | -1.581725 | -0.862395 |
| 6  | 3.404049  | -2.443291 | -0.768308 |
| 6  | 5.796773  | -2.063553 | -0.740195 |
| 6  | 3.602404  | -3.811792 | -0.561751 |
| 6  | 5.984301  | -3.428189 | -0.530856 |
| 1  | 6.633066  | -1.374013 | -0.817986 |
| 6  | 4.897680  | -4.296187 | -0.445371 |
| 1  | 2.743224  | -4.472837 | -0.489770 |
| 1  | 6.994682  | -3.817126 | -0.436100 |
| 1  | 5.061171  | -5.357879 | -0.284587 |
| 6  | 2.108358  | -1.871545 | -0.853880 |
| 7  | 1.079070  | -1.343719 | -0.906655 |
| 6  | -1.722835 | 2.468437  | -0.907195 |
| 6  | -0.293678 | 2.550039  | -1.427581 |
| 8  | 0.371071  | 1.428741  | -1.529740 |

|    |           |           |           |
|----|-----------|-----------|-----------|
| 8  | 0.212539  | 3.632421  | -1.692379 |
| 1  | -2.347593 | 3.085728  | -1.565728 |
| 7  | -2.172366 | 1.075563  | -0.947240 |
| 6  | -3.439182 | 0.771055  | -0.893185 |
| 8  | -3.866359 | -0.456831 | -0.861802 |
| 8  | 4.272075  | -0.242678 | -1.125535 |
| 16 | 4.233190  | 0.766187  | 0.190346  |
| 8  | 5.604575  | 1.109653  | 0.531853  |
| 6  | 3.091464  | 3.174385  | 0.426150  |
| 6  | 1.900735  | 3.109490  | 1.154010  |
| 6  | 4.009037  | 4.192503  | 0.688304  |
| 6  | 1.626053  | 4.063590  | 2.126953  |
| 1  | 1.190920  | 2.306028  | 0.949226  |
| 6  | 3.731381  | 5.147176  | 1.661219  |
| 1  | 4.937532  | 4.237994  | 0.120459  |
| 6  | 2.540947  | 5.083080  | 2.380409  |
| 1  | 0.696318  | 4.012657  | 2.689877  |
| 1  | 4.446136  | 5.943091  | 1.857139  |
| 1  | 2.324874  | 5.830619  | 3.140507  |
| 8  | -1.773218 | -1.824836 | -0.392012 |
| 1  | -3.095777 | -1.104730 | -0.707957 |
| 6  | -1.541940 | -2.356316 | 0.860698  |
| 6  | -1.382446 | -3.863881 | 0.699811  |
| 6  | -2.671057 | -1.974599 | 1.812574  |
| 1  | -0.612178 | -2.000331 | 1.335613  |
| 9  | -2.427920 | -4.411455 | 0.078317  |
| 9  | -0.297614 | -4.112805 | -0.041123 |
| 9  | -1.228019 | -4.488480 | 1.869778  |
| 9  | -3.845355 | -2.479097 | 1.418530  |
| 9  | -2.447403 | -2.384578 | 3.060390  |
| 9  | -2.798412 | -0.641423 | 1.840971  |
| 6  | -1.763419 | 3.021030  | 0.512375  |
| 1  | -1.368721 | 4.042399  | 0.532084  |
| 1  | -2.791433 | 3.037510  | 0.890747  |
| 1  | -1.157032 | 2.392762  | 1.179799  |
| 8  | -4.318003 | 1.741446  | -0.913744 |
| 6  | -5.733254 | 1.589782  | -0.476476 |
| 6  | -5.767846 | 0.990504  | 0.914785  |
| 1  | -5.465414 | -0.059914 | 0.925014  |
| 1  | -5.117443 | 1.556371  | 1.593729  |
| 1  | -6.792540 | 1.053746  | 1.298950  |
| 6  | -6.206208 | 3.028932  | -0.457153 |
| 1  | -7.258844 | 3.065101  | -0.156239 |
| 1  | -5.621187 | 3.622792  | 0.255168  |
| 1  | -6.114506 | 3.483198  | -1.450434 |
| 6  | -6.501921 | 0.780845  | -1.500653 |
| 1  | -6.373822 | 1.208376  | -2.501999 |
| 1  | -6.193479 | -0.267845 | -1.518714 |
| 1  | -7.568926 | 0.818843  | -1.250919 |

-----  
---  
(3')  
-----  
---

Number of imaginary frequencies : 0

Electronic energy : =-2802.4361773  
Zero-point correction= 0.504588  
Thermal correction to Energy= 0.546062  
Thermal correction to Enthalpy= 0.547006  
Thermal correction to Gibbs Free Energy= 0.431175  
Sum of electronic and zero-point Energies= -2801.931590  
Sum of electronic and thermal Energies= -2801.890116  
Sum of electronic and thermal Enthalpies= -2801.889172  
Sum of electronic and thermal Free Energies= -2802.005002

.....  
Cartesian Coordinates  
.....

|    |           |           |           |
|----|-----------|-----------|-----------|
| 46 | -0.629290 | -0.471104 | -1.414331 |
| 6  | 2.347497  | 2.484399  | -0.487614 |
| 1  | 2.937296  | 3.200014  | -1.072328 |
| 1  | 1.785136  | 1.835863  | -1.172832 |
| 8  | 2.897581  | 0.307590  | 0.992058  |
| 6  | 4.736497  | -0.459674 | -1.048624 |
| 6  | 3.861486  | -1.513119 | -1.350936 |
| 6  | 6.071888  | -0.695313 | -0.787625 |
| 6  | 4.341060  | -2.825639 | -1.396310 |
| 6  | 6.541659  | -2.006193 | -0.839467 |
| 1  | 6.724693  | 0.142084  | -0.555372 |
| 6  | 5.685172  | -3.062421 | -1.142891 |
| 1  | 3.657846  | -3.639124 | -1.623980 |
| 1  | 7.591378  | -2.202662 | -0.637745 |
| 1  | 6.066440  | -4.078762 | -1.178304 |
| 6  | 2.487966  | -1.205490 | -1.532791 |
| 7  | 1.373792  | -0.904325 | -1.627958 |
| 6  | -2.919054 | 1.185016  | -2.090216 |
| 6  | -1.801723 | 1.493276  | -3.076589 |
| 8  | -0.688340 | 0.819154  | -2.965517 |
| 8  | -1.950784 | 2.371907  | -3.916636 |
| 1  | -3.833285 | 1.020880  | -2.676137 |
| 7  | -2.583361 | -0.024076 | -1.338707 |
| 6  | -3.495058 | -0.692020 | -0.687326 |
| 8  | -3.222150 | -1.732728 | 0.041669  |
| 8  | 4.246342  | 0.835439  | -1.069647 |
| 16 | 3.545820  | 1.419934  | 0.311811  |



|   |           |           |           |
|---|-----------|-----------|-----------|
| 8 | 4.549030  | 2.192992  | 1.023014  |
| 6 | 1.481970  | 3.126627  | 0.548939  |
| 6 | 1.898900  | 4.293033  | 1.192744  |
| 6 | 0.271250  | 2.529280  | 0.905590  |
| 6 | 1.101553  | 4.865561  | 2.177482  |
| 1 | 2.845919  | 4.752518  | 0.913190  |
| 6 | -0.523834 | 3.103380  | 1.892768  |
| 1 | -0.047474 | 1.618274  | 0.390749  |
| 6 | -0.108243 | 4.271234  | 2.527346  |
| 1 | 1.425035  | 5.778107  | 2.672703  |
| 1 | -1.467682 | 2.637746  | 2.166958  |
| 1 | -0.731623 | 4.721167  | 3.296781  |
| 8 | -0.694980 | -1.736728 | 0.206200  |
| 1 | -2.214140 | -1.836935 | 0.175437  |
| 6 | -0.038364 | -1.266169 | 1.327129  |
| 6 | 0.810424  | -2.401320 | 1.888994  |
| 6 | -1.030128 | -0.706263 | 2.343565  |
| 1 | 0.678616  | -0.451646 | 1.122884  |
| 9 | 0.086099  | -3.486133 | 2.167643  |
| 9 | 1.726130  | -2.752269 | 0.980285  |
| 9 | 1.459701  | -2.044126 | 2.999329  |
| 9 | -1.854350 | -1.648281 | 2.813807  |
| 9 | -0.422788 | -0.133800 | 3.381523  |
| 9 | -1.796715 | 0.230130  | 1.761855  |
| 6 | -3.101807 | 2.381194  | -1.164840 |
| 1 | -3.343876 | 3.274238  | -1.749915 |
| 1 | -3.913167 | 2.202588  | -0.450563 |
| 1 | -2.176387 | 2.572785  | -0.603809 |
| 8 | -4.744901 | -0.317689 | -0.801307 |
| 6 | -5.829292 | -0.739134 | 0.126959  |
| 6 | -5.421176 | -0.444049 | 1.556817  |
| 1 | -4.650383 | -1.125494 | 1.925996  |
| 1 | -5.058315 | 0.587842  | 1.647886  |
| 1 | -6.301796 | -0.548819 | 2.201040  |
| 6 | -6.968708 | 0.162433  | -0.303016 |
| 1 | -7.858753 | -0.059697 | 0.295750  |
| 1 | -6.708279 | 1.217594  | -0.157713 |
| 1 | -7.214168 | 0.002983  | -1.359058 |
| 6 | -6.168574 | -2.194904 | -0.117299 |
| 1 | -6.379674 | -2.366013 | -1.179453 |
| 1 | -5.366451 | -2.867505 | 0.197948  |
| 1 | -7.070951 | -2.448890 | 0.451411  |

-----  
 -----  
 Possibilities of C-H bond activation Transition States at *meta*, *ortho* and *para*  
 positions at the SMD/M06/6-31G\*\* Level of Theory.  
 -----  
 -----

*meta-C'* [4'-5']<sup>‡</sup>

---

Number of imaginary frequencies : 1  
The smallest frequency is : -1619.6921 cm(-1)

Electronic energy : =-2012.8468083  
Zero-point correction= 0.431387  
Thermal correction to Energy= 0.463295  
Thermal correction to Enthalpy= 0.464239  
Thermal correction to Gibbs Free Energy= 0.368060  
Sum of electronic and zero-point Energies= -2012.415421  
Sum of electronic and thermal Energies= -2012.383513  
Sum of electronic and thermal Enthalpies= -2012.382569  
Sum of electronic and thermal Free Energies= -2012.478748

---

Cartesian Coordinates

---

|    |           |           |           |
|----|-----------|-----------|-----------|
| 46 | -0.787993 | 0.843020  | 0.129068  |
| 6  | -0.404005 | -1.200472 | 0.692338  |
| 6  | -0.326921 | -1.278017 | 2.096488  |
| 6  | 0.734409  | -1.922144 | 2.720059  |
| 6  | 1.738860  | -2.489606 | 1.943187  |
| 6  | 1.677587  | -2.454001 | 0.545270  |
| 6  | 0.607425  | -1.813115 | -0.070841 |
| 1  | 2.589251  | -2.973612 | 2.422324  |
| 1  | 0.791562  | -1.975919 | 3.804495  |
| 1  | -1.116013 | -0.824918 | 2.696502  |
| 1  | 0.562011  | -1.763253 | -1.159241 |
| 6  | 2.798877  | -3.043330 | -0.250233 |
| 1  | 2.462943  | -3.631758 | -1.114103 |
| 1  | 3.467379  | -3.667561 | 0.353529  |
| 8  | 3.120109  | -0.949965 | -1.913271 |
| 6  | 4.677328  | 0.348769  | 0.193588  |
| 6  | 3.815129  | 1.455198  | 0.163289  |
| 6  | 6.046223  | 0.511897  | 0.086383  |
| 6  | 4.347785  | 2.743170  | 0.032905  |
| 6  | 6.563399  | 1.798190  | -0.047662 |
| 1  | 6.691251  | -0.362219 | 0.116479  |
| 6  | 5.721333  | 2.906929  | -0.072313 |
| 1  | 3.676457  | 3.597060  | 0.011541  |
| 1  | 7.638585  | 1.932184  | -0.131136 |
| 1  | 6.137055  | 3.905147  | -0.174817 |
| 6  | 2.407626  | 1.270123  | 0.232023  |
| 7  | 1.257298  | 1.134165  | 0.257758  |
| 6  | -3.451827 | 2.018147  | -0.137511 |
| 6  | -2.434263 | 3.125304  | -0.383772 |
| 8  | -1.173365 | 2.820462  | -0.316645 |

|    |           |           |           |
|----|-----------|-----------|-----------|
| 8  | -2.828916 | 4.267318  | -0.607838 |
| 1  | -4.132866 | 2.014880  | -1.000589 |
| 7  | -2.773511 | 0.727851  | -0.040441 |
| 6  | -3.424811 | -0.411136 | -0.208504 |
| 8  | -2.862496 | -1.545176 | -0.126785 |
| 1  | -1.629910 | -1.325977 | 0.217492  |
| 8  | 4.138309  | -0.915781 | 0.379863  |
| 8  | 5.109810  | -2.389772 | -1.420987 |
| 16 | 3.854403  | -1.798630 | -0.988734 |
| 6  | -4.240228 | 2.344962  | 1.124691  |
| 1  | -4.730563 | 3.318442  | 1.019768  |
| 1  | -5.007863 | 1.586192  | 1.311167  |
| 1  | -3.569332 | 2.384090  | 1.992757  |
| 8  | -4.718233 | -0.293482 | -0.480951 |
| 6  | -5.645600 | -1.438042 | -0.527604 |
| 6  | -5.289170 | -2.352457 | -1.682991 |
| 1  | -5.222313 | -1.779931 | -2.615950 |
| 1  | -4.343058 | -2.874970 | -1.519783 |
| 1  | -6.079926 | -3.102826 | -1.803158 |
| 6  | -5.658366 | -2.147303 | 0.812435  |
| 1  | -4.720018 | -2.670954 | 1.013607  |
| 1  | -5.846947 | -1.431434 | 1.622396  |
| 1  | -6.469060 | -2.885419 | 0.817085  |
| 6  | -6.976470 | -0.754852 | -0.778312 |
| 1  | -7.773264 | -1.504680 | -0.834030 |
| 1  | -7.214186 | -0.056632 | 0.033400  |
| 1  | -6.958119 | -0.199012 | -1.722920 |

-----  
---  
*meta-C'* [4']  
-----  
---

Number of imaginary frequencies : 0

Electronic energy :        =-2012.8679316  
Zero-point correction=            0.436424  
Thermal correction to Energy=        0.468999  
Thermal correction to Enthalpy=        0.469943  
Thermal correction to Gibbs Free Energy=    0.371853  
Sum of electronic and zero-point Energies=   -2012.431508  
Sum of electronic and thermal Energies=   -2012.398932  
Sum of electronic and thermal Enthalpies=   -2012.397988  
Sum of electronic and thermal Free Energies=  -2012.496079

-----  
Cartesian Coordinates  
-----

|    |           |           |           |
|----|-----------|-----------|-----------|
| 46 | -0.738818 | 1.041817  | -0.037567 |
| 6  | -0.145333 | -0.760806 | 0.618007  |
| 6  | -0.547914 | -1.225038 | 1.874302  |
| 6  | 0.104282  | -2.313020 | 2.452802  |
| 6  | 1.176089  | -2.917793 | 1.802450  |
| 6  | 1.557469  | -2.481305 | 0.533782  |
| 6  | 0.862470  | -1.432952 | -0.071238 |
| 1  | 1.722298  | -3.728263 | 2.282393  |
| 1  | -0.203917 | -2.669800 | 3.433626  |
| 1  | -1.356350 | -0.728593 | 2.411906  |
| 1  | 1.171271  | -1.086184 | -1.056360 |
| 6  | 2.755824  | -3.092925 | -0.126239 |
| 1  | 2.514502  | -3.684971 | -1.020727 |
| 1  | 3.325545  | -3.729845 | 0.559266  |
| 8  | 3.452622  | -1.225339 | -1.948870 |
| 6  | 4.598131  | 0.372221  | 0.253903  |
| 6  | 3.858359  | 1.539990  | 0.002243  |
| 6  | 5.979327  | 0.413014  | 0.327948  |
| 6  | 4.529198  | 2.756589  | -0.176395 |
| 6  | 6.632903  | 1.628315  | 0.141646  |
| 1  | 6.529535  | -0.499102 | 0.541708  |
| 6  | 5.913865  | 2.793589  | -0.110088 |
| 1  | 3.951609  | 3.657217  | -0.365777 |
| 1  | 7.717506  | 1.661973  | 0.200545  |
| 1  | 6.433230  | 3.737304  | -0.249863 |
| 6  | 2.437947  | 1.501382  | -0.050567 |
| 7  | 1.279339  | 1.477932  | -0.085902 |
| 6  | -3.486677 | 1.945719  | 0.272648  |
| 6  | -2.696152 | 3.163993  | -0.216165 |
| 8  | -1.467678 | 2.996115  | -0.553725 |
| 8  | -3.284724 | 4.249919  | -0.231691 |
| 1  | -4.439568 | 1.946673  | -0.271824 |
| 7  | -2.756955 | 0.703603  | -0.008620 |
| 6  | -3.413317 | -0.385302 | -0.260262 |
| 8  | -2.815996 | -1.524326 | -0.541626 |
| 1  | -1.845327 | -1.404034 | -0.472300 |
| 8  | 3.921275  | -0.819319 | 0.480691  |
| 8  | 5.263763  | -2.523788 | -0.815660 |
| 16 | 3.947075  | -1.910350 | -0.763941 |
| 6  | -3.756624 | 2.079088  | 1.765435  |
| 1  | -4.288607 | 3.013341  | 1.972008  |
| 1  | -4.365725 | 1.242262  | 2.125679  |
| 1  | -2.810849 | 2.085725  | 2.324061  |
| 8  | -4.722207 | -0.381936 | -0.245950 |
| 6  | -5.595026 | -1.543180 | -0.564542 |
| 6  | -5.348536 | -2.001719 | -1.987220 |
| 6  | -5.389006 | -2.633334 | 0.467086  |
| 6  | -6.975384 | -0.931921 | -0.430420 |
| 1  | -5.391337 | -1.151472 | -2.678044 |

|   |           |           |           |
|---|-----------|-----------|-----------|
| 1 | -4.387504 | -2.508490 | -2.106297 |
| 1 | -6.139661 | -2.706208 | -2.269205 |
| 1 | -5.496087 | -2.227168 | 1.479873  |
| 1 | -6.160627 | -3.399771 | 0.328195  |
| 1 | -4.412330 | -3.115931 | 0.377429  |
| 1 | -7.735241 | -1.694972 | -0.630621 |
| 1 | -7.133233 | -0.544164 | 0.582454  |
| 1 | -7.111176 | -0.112497 | -1.145399 |

-----  
---  
*meta-C' (5')*  
-----  
---

Number of imaginary frequencies : 0

Electronic energy :        =-2012.8721201  
Zero-point correction=            0.436430  
Thermal correction to Energy=        0.469045  
Thermal correction to Enthalpy=        0.469989  
Thermal correction to Gibbs Free Energy=    0.371728  
Sum of electronic and zero-point Energies=   -2012.435690  
Sum of electronic and thermal Energies=   -2012.403075  
Sum of electronic and thermal Enthalpies=   -2012.402131  
Sum of electronic and thermal Free Energies=  -2012.500392

-----  
                  Cartesian Coordinates  
-----

|    |           |           |           |
|----|-----------|-----------|-----------|
| 46 | -0.782453 | 0.488674  | -0.036752 |
| 6  | -0.432095 | -1.947785 | -0.201509 |
| 6  | -0.779594 | -1.568389 | 1.111181  |
| 6  | 0.208943  | -1.577321 | 2.122235  |
| 6  | 1.484650  | -2.007603 | 1.833602  |
| 6  | 1.821272  | -2.431515 | 0.529996  |
| 6  | 0.881546  | -2.365740 | -0.482940 |
| 1  | 2.240221  | -2.053281 | 2.616222  |
| 1  | -0.058153 | -1.293704 | 3.136907  |
| 1  | -1.826657 | -1.458751 | 1.383107  |
| 1  | 1.137591  | -2.694146 | -1.488416 |
| 6  | 3.189477  | -2.974905 | 0.260985  |
| 1  | 3.176024  | -3.826993 | -0.430746 |
| 1  | 3.716114  | -3.279841 | 1.172795  |
| 8  | 3.662730  | -1.201003 | -1.708217 |
| 6  | 4.708133  | 0.594812  | 0.307122  |
| 6  | 3.733426  | 1.552122  | -0.009491 |
| 6  | 6.051968  | 0.916257  | 0.307073  |
| 6  | 4.122657  | 2.859692  | -0.319968 |

|    |           |           |           |
|----|-----------|-----------|-----------|
| 6  | 6.428070  | 2.220228  | -0.007675 |
| 1  | 6.783530  | 0.153142  | 0.559003  |
| 6  | 5.471766  | 3.184856  | -0.316536 |
| 1  | 3.364967  | 3.599792  | -0.561041 |
| 1  | 7.482356  | 2.483814  | -0.007964 |
| 1  | 5.778431  | 4.198684  | -0.557193 |
| 6  | 2.366636  | 1.165007  | -0.017025 |
| 7  | 1.263349  | 0.813167  | -0.020666 |
| 6  | -3.250242 | 1.938535  | 0.212071  |
| 6  | -2.187378 | 2.938259  | -0.194723 |
| 8  | -0.994482 | 2.464432  | -0.441901 |
| 8  | -2.427109 | 4.138863  | -0.255558 |
| 1  | -4.142939 | 2.161655  | -0.386603 |
| 7  | -2.784779 | 0.585905  | -0.084017 |
| 6  | -3.650505 | -0.422780 | -0.306016 |
| 8  | -3.339050 | -1.581521 | -0.584670 |
| 1  | -1.216416 | -2.046736 | -0.945956 |
| 8  | 4.290263  | -0.678637 | 0.665565  |
| 8  | 5.613891  | -2.367835 | -0.650851 |
| 16 | 4.278614  | -1.807344 | -0.540138 |
| 6  | -3.579184 | 2.141621  | 1.687362  |
| 1  | -3.903608 | 3.172176  | 1.869908  |
| 1  | -4.382182 | 1.463842  | 1.995498  |
| 1  | -2.695070 | 1.939701  | 2.307024  |
| 8  | -4.932990 | -0.008352 | -0.185131 |
| 6  | -6.063571 | -0.915228 | -0.367301 |
| 6  | -6.094542 | -1.451877 | -1.786672 |
| 6  | -6.031081 | -2.017871 | 0.676250  |
| 6  | -7.253823 | -0.003581 | -0.124145 |
| 1  | -6.059802 | -0.626287 | -2.508171 |
| 1  | -5.260393 | -2.129167 | -1.985721 |
| 1  | -7.030973 | -2.000511 | -1.946494 |
| 1  | -5.919954 | -1.587203 | 1.679632  |
| 1  | -6.977236 | -2.572094 | 0.649704  |
| 1  | -5.214079 | -2.722691 | 0.504031  |
| 1  | -8.188139 | -0.567161 | -0.227505 |
| 1  | -7.217254 | 0.421007  | 0.886708  |
| 1  | -7.266558 | 0.821400  | -0.846287 |

-----  
---  
*meta-B'*  
-----  
---

Number of imaginary frequencies : 1

The smallest frequency is : -1658.5879 cm(-1)

|                                              |                |
|----------------------------------------------|----------------|
| Electronic energy :                          | =-2241.8419809 |
| Zero-point correction=                       | 0.495699       |
| Thermal correction to Energy=                | 0.533163       |
| Thermal correction to Enthalpy=              | 0.534108       |
| Thermal correction to Gibbs Free Energy=     | 0.426237       |
| Sum of electronic and zero-point Energies=   | -2241.346282   |
| Sum of electronic and thermal Energies=      | -2241.308818   |
| Sum of electronic and thermal Enthalpies=    | -2241.307873   |
| Sum of electronic and thermal Free Energies= | -2241.415744   |

.....  
Cartesian Coordinates  
.....

|    |           |           |           |
|----|-----------|-----------|-----------|
| 46 | -0.546683 | 1.938934  | 0.021116  |
| 6  | 3.213327  | 3.046316  | 1.338518  |
| 6  | 1.941502  | 3.265086  | 0.823815  |
| 6  | 1.482949  | 2.549685  | -0.298741 |
| 6  | 2.339845  | 1.604132  | -0.892223 |
| 6  | 3.613063  | 1.380481  | -0.382518 |
| 6  | 4.039448  | 2.101645  | 0.739831  |
| 1  | 2.001243  | 1.031025  | -1.755912 |
| 1  | 0.807490  | 3.309535  | -1.116680 |
| 1  | 1.289214  | 4.009255  | 1.281326  |
| 1  | 5.035193  | 1.918265  | 1.142033  |
| 6  | 4.507040  | 0.344901  | -0.983080 |
| 8  | 4.251649  | -1.080175 | 1.299550  |
| 6  | 2.245896  | -2.691700 | -0.057840 |
| 6  | 1.007869  | -2.364915 | 0.513564  |
| 6  | 2.737650  | -3.983201 | 0.009747  |
| 6  | 0.246363  | -3.355116 | 1.147510  |
| 6  | 1.982435  | -4.955082 | 0.661546  |
| 1  | 3.690124  | -4.225836 | -0.453586 |
| 6  | 0.745067  | -4.647182 | 1.222958  |
| 1  | -0.723560 | -3.091263 | 1.562082  |
| 1  | 2.364704  | -5.970860 | 0.718535  |
| 1  | 0.163798  | -5.420024 | 1.717627  |
| 6  | 0.526296  | -1.033415 | 0.407098  |
| 7  | 0.137702  | 0.050467  | 0.291418  |
| 6  | -0.842711 | 4.572944  | -1.133715 |
| 8  | 0.225023  | 4.328727  | -1.760621 |
| 6  | -1.592175 | 5.826264  | -1.456225 |
| 1  | -0.899336 | 6.671283  | -1.496236 |
| 1  | -2.037005 | 5.715880  | -2.451605 |
| 1  | -2.383444 | 6.014076  | -0.728731 |
| 1  | 3.562877  | 3.604390  | 2.203368  |
| 8  | -1.338040 | 3.809258  | -0.245557 |
| 6  | -4.082102 | 0.264540  | 1.827372  |
| 6  | -2.700288 | 0.907852  | 1.611125  |

|    |           |           |           |
|----|-----------|-----------|-----------|
| 8  | -2.490636 | 1.280334  | 0.395467  |
| 8  | -1.934120 | 1.067763  | 2.562954  |
| 1  | -4.793280 | 1.101553  | 1.839494  |
| 7  | -4.470453 | -0.562293 | 0.694701  |
| 1  | -5.183673 | -0.213706 | 0.068081  |
| 6  | -3.590932 | -1.448638 | 0.162929  |
| 8  | -2.552849 | -1.798521 | 0.709858  |
| 16 | 4.394466  | -1.231919 | -0.138468 |
| 8  | 2.920658  | -1.689363 | -0.738514 |
| 8  | 5.398330  | -2.141467 | -0.665615 |
| 1  | 5.571837  | 0.598892  | -0.903178 |
| 1  | 4.284904  | 0.124044  | -2.033775 |
| 6  | -4.177344 | -0.481466 | 3.144278  |
| 1  | -5.183946 | -0.895413 | 3.267223  |
| 1  | -3.455018 | -1.303430 | 3.182606  |
| 1  | -3.973178 | 0.189445  | 3.983573  |
| 8  | -4.040085 | -1.888943 | -1.021046 |
| 6  | -3.232396 | -2.774151 | -1.861295 |
| 6  | -3.097989 | -4.135494 | -1.204890 |
| 1  | -2.577332 | -4.818158 | -1.887607 |
| 1  | -2.529289 | -4.083417 | -0.271302 |
| 1  | -4.087580 | -4.558249 | -0.992595 |
| 6  | -1.887001 | -2.135606 | -2.165556 |
| 1  | -1.185141 | -2.235211 | -1.334242 |
| 1  | -1.445660 | -2.621092 | -3.044353 |
| 1  | -2.012792 | -1.069094 | -2.393526 |
| 6  | -4.064798 | -2.871820 | -3.126077 |
| 1  | -4.161200 | -1.890355 | -3.606049 |
| 1  | -3.590559 | -3.558892 | -3.835721 |
| 1  | -5.069710 | -3.247374 | -2.900159 |

-----  
---  
*ortho-B'*  
-----  
---

Number of imaginary frequencies : 1

The smallest frequency is : -1642.7190 cm(-1)

Electronic energy : =-2241.8305257

Zero-point correction= 0.494825

Thermal correction to Energy= 0.532618

Thermal correction to Enthalpy= 0.533562

Thermal correction to Gibbs Free Energy= 0.424514

Sum of electronic and zero-point Energies= -2241.335701

Sum of electronic and thermal Energies= -2241.297907

Sum of electronic and thermal Enthalpies= -2241.296963

Sum of electronic and thermal Free Energies= -2241.406011

S224



.....  
 Cartesian Coordinates  
 .....

|    |           |           |           |
|----|-----------|-----------|-----------|
| 46 | -1.057123 | -1.526578 | -0.259763 |
| 6  | -2.576722 | -0.862560 | 1.113464  |
| 1  | -3.201400 | -1.546190 | 0.214209  |
| 8  | -3.974441 | -2.425315 | -0.481489 |
| 8  | -1.940231 | -3.340460 | -0.632056 |
| 6  | -2.367244 | -1.572790 | 2.311873  |
| 6  | -2.585999 | -0.981448 | 3.547690  |
| 6  | -3.065567 | 0.324717  | 3.599707  |
| 6  | -3.321363 | 1.033794  | 2.429197  |
| 6  | -3.050144 | 0.469556  | 1.184444  |
| 1  | -2.037380 | -2.610160 | 2.257657  |
| 1  | -2.404217 | -1.536847 | 4.464404  |
| 1  | -3.263157 | 0.793760  | 4.560894  |
| 1  | -3.741261 | 2.035609  | 2.496433  |
| 6  | -3.425081 | 1.210280  | -0.066423 |
| 1  | -4.504944 | 1.404821  | -0.100135 |
| 1  | -3.146971 | 0.676591  | -0.983418 |
| 8  | -1.987710 | 3.291063  | 0.956086  |
| 6  | -0.414975 | 3.287611  | -1.330883 |
| 6  | 0.670526  | 2.572461  | -0.801010 |
| 6  | -0.260117 | 4.581596  | -1.786498 |
| 6  | 1.939190  | 3.151914  | -0.752754 |
| 6  | 1.006681  | 5.159611  | -1.719204 |
| 1  | -1.114910 | 5.114998  | -2.194885 |
| 6  | 2.095699  | 4.452137  | -1.212890 |
| 1  | 2.773646  | 2.571085  | -0.369583 |
| 1  | 1.144027  | 6.176802  | -2.076641 |
| 1  | 3.076142  | 4.918446  | -1.180007 |
| 6  | 0.357050  | 1.264470  | -0.357116 |
| 7  | -0.099894 | 0.245738  | -0.049231 |
| 6  | -3.207607 | -3.389960 | -0.746622 |
| 6  | 2.854365  | -2.315021 | -1.776042 |
| 6  | 1.610802  | -2.261961 | -0.874375 |
| 8  | 0.511586  | -2.087187 | -1.523668 |
| 8  | 1.722720  | -2.389334 | 0.346794  |
| 1  | 2.721890  | -1.574021 | -2.572726 |
| 7  | 4.039017  | -1.971402 | -1.010260 |
| 1  | 4.436877  | -2.735569 | -0.472845 |
| 6  | 4.011269  | -0.781848 | -0.335805 |
| 8  | 3.312189  | 0.165598  | -0.667998 |
| 16 | -2.731689 | 2.880286  | -0.221848 |
| 8  | -3.746195 | 3.759285  | -0.776953 |
| 8  | -1.628048 | 2.624120  | -1.431566 |
| 6  | 3.004678  | -3.703349 | -2.368577 |
| 1  | 3.897188  | -3.762057 | -3.000568 |
| 1  | 3.093344  | -4.451835 | -1.570051 |

|   |           |           |           |
|---|-----------|-----------|-----------|
| 1 | 2.130065  | -3.955939 | -2.976035 |
| 8 | 4.867250  | -0.809892 | 0.691562  |
| 6 | 4.891599  | 0.263403  | 1.690553  |
| 6 | 3.507779  | 0.440226  | 2.291139  |
| 1 | 3.569359  | 1.123058  | 3.146818  |
| 1 | 2.787231  | 0.846177  | 1.575068  |
| 1 | 3.130024  | -0.525089 | 2.651071  |
| 6 | 5.447271  | 1.532187  | 1.072912  |
| 1 | 4.792064  | 1.929100  | 0.293599  |
| 1 | 5.563604  | 2.297537  | 1.849634  |
| 1 | 6.433874  | 1.341944  | 0.633183  |
| 6 | 5.849834  | -0.277622 | 2.735528  |
| 1 | 6.835537  | -0.471194 | 2.296082  |
| 1 | 5.970796  | 0.450769  | 3.545373  |
| 1 | 5.469720  | -1.212271 | 3.164192  |
| 6 | -3.793314 | -4.671387 | -1.248400 |
| 1 | -3.880750 | -4.604294 | -2.339044 |
| 1 | -3.145286 | -5.517025 | -1.008907 |
| 1 | -4.792897 | -4.819672 | -0.833822 |

-----  
 ---  
*ortho-C'*  
 -----  
 ---

Number of imaginary frequencies : 1  
 The smallest frequency is : -1688.5000 cm(-1)

Electronic energy : =-2012.8392086  
 Zero-point correction= 0.430187  
 Thermal correction to Energy= 0.462527  
 Thermal correction to Enthalpy= 0.463471  
 Thermal correction to Gibbs Free Energy= 0.366037  
 Sum of electronic and zero-point Energies= -2012.409022  
 Sum of electronic and thermal Energies= -2012.376682  
 Sum of electronic and thermal Enthalpies= -2012.375738  
 Sum of electronic and thermal Free Energies= -2012.473171

.....  
 Cartesian Coordinates  
 .....

|    |           |           |          |
|----|-----------|-----------|----------|
| 46 | -0.403790 | 0.941508  | 0.636855 |
| 6  | -0.250204 | -0.971952 | 2.804872 |
| 6  | 0.632090  | -1.656616 | 3.629467 |
| 6  | 1.592308  | -2.488595 | 3.057806 |
| 6  | 1.662867  | -2.641847 | 1.675983 |
| 6  | 0.804780  | -1.927631 | 0.842500 |
| 6  | -0.173049 | -1.071439 | 1.401450 |

|    |           |           |           |
|----|-----------|-----------|-----------|
| 1  | 2.390046  | -3.327620 | 1.243563  |
| 1  | 2.279820  | -3.042223 | 3.693369  |
| 1  | 0.567056  | -1.557853 | 4.710352  |
| 1  | -1.309681 | -1.173876 | 0.772079  |
| 6  | 0.867061  | -2.181853 | -0.634652 |
| 1  | -0.063836 | -1.903861 | -1.147502 |
| 1  | 1.082539  | -3.234870 | -0.850943 |
| 8  | 1.758024  | 0.081605  | -1.847834 |
| 6  | 4.286132  | -0.285271 | -0.514304 |
| 6  | 4.033959  | 0.930620  | 0.143163  |
| 6  | 5.489894  | -0.511903 | -1.152726 |
| 6  | 5.017817  | 1.923016  | 0.167259  |
| 6  | 6.463774  | 0.483934  | -1.121302 |
| 1  | 5.654410  | -1.461777 | -1.655114 |
| 6  | 6.232626  | 1.689378  | -0.462312 |
| 1  | 4.816188  | 2.863060  | 0.672920  |
| 1  | 7.415186  | 0.312969  | -1.618246 |
| 1  | 7.002179  | 2.455763  | -0.444293 |
| 6  | 2.737299  | 1.119612  | 0.687719  |
| 7  | 1.634509  | 1.191992  | 1.039789  |
| 6  | -2.910468 | 2.111267  | -0.328575 |
| 6  | -1.848739 | 3.203427  | -0.350813 |
| 8  | -0.641086 | 2.888491  | 0.012236  |
| 8  | -2.161174 | 4.342339  | -0.688686 |
| 1  | -3.321689 | 2.052069  | -1.347201 |
| 7  | -2.306046 | 0.831792  | 0.035151  |
| 6  | -2.928490 | -0.315603 | -0.186019 |
| 8  | -2.444175 | -1.437514 | 0.149551  |
| 1  | -1.022268 | -0.342752 | 3.246437  |
| 8  | 3.335456  | -1.291315 | -0.456648 |
| 8  | 2.565117  | -2.130833 | -2.690801 |
| 16 | 2.127864  | -1.299070 | -1.582318 |
| 6  | -4.017215 | 2.513036  | 0.637917  |
| 1  | -3.616182 | 2.613038  | 1.654844  |
| 1  | -4.445162 | 3.474378  | 0.336056  |
| 1  | -4.815033 | 1.762389  | 0.648497  |
| 8  | -4.102939 | -0.217532 | -0.796244 |
| 6  | -5.040288 | -1.348519 | -0.931208 |
| 6  | -6.228833 | -0.691782 | -1.607220 |
| 1  | -7.024442 | -1.429286 | -1.760256 |
| 1  | -6.625339 | 0.122755  | -0.989123 |
| 1  | -5.944157 | -0.282791 | -2.583558 |
| 6  | -4.448126 | -2.422596 | -1.823090 |
| 1  | -4.092479 | -1.985056 | -2.763742 |
| 1  | -3.621756 | -2.953531 | -1.344149 |
| 1  | -5.229753 | -3.152791 | -2.064915 |
| 6  | -5.425593 | -1.859498 | 0.442982  |
| 1  | -4.586989 | -2.336197 | 0.957864  |
| 1  | -5.804283 | -1.038321 | 1.064782  |

1 -6.226504 -2.601394 0.339479

-----  
---  
*para-B'*  
-----  
---

Number of imaginary frequencies : 1  
The smallest frequency is : -1543.4182 cm(-1)

Electronic energy : =-2241.8401486  
Zero-point correction= 0.496402  
Thermal correction to Energy= 0.533606  
Thermal correction to Enthalpy= 0.534551  
Thermal correction to Gibbs Free Energy= 0.427629  
Sum of electronic and zero-point Energies= -2241.343746  
Sum of electronic and thermal Energies= -2241.306542  
Sum of electronic and thermal Enthalpies= -2241.305598  
Sum of electronic and thermal Free Energies= -2241.412519

-----  
Cartesian Coordinates  
-----

|    |           |           |           |
|----|-----------|-----------|-----------|
| 6  | 2.843102  | 1.803052  | -1.689062 |
| 6  | 1.536464  | 2.259126  | -1.755895 |
| 6  | 0.919286  | 2.830630  | -0.627008 |
| 6  | 1.677609  | 2.997997  | 0.547511  |
| 6  | 2.985597  | 2.544488  | 0.618216  |
| 6  | 3.551967  | 1.904946  | -0.488204 |
| 1  | 3.309482  | 1.317604  | -2.545019 |
| 1  | 0.967855  | 2.137443  | -2.676786 |
| 1  | 0.064029  | 3.809243  | -0.864750 |
| 1  | 3.557421  | 2.638618  | 1.539751  |
| 6  | 4.866538  | 1.211229  | -0.349955 |
| 8  | 3.973885  | -0.255639 | 1.738105  |
| 6  | 2.933176  | -2.172606 | -0.179905 |
| 6  | 1.572619  | -2.072700 | 0.147151  |
| 6  | 3.587745  | -3.390318 | -0.123093 |
| 6  | 0.868522  | -3.223339 | 0.528602  |
| 6  | 2.878784  | -4.524728 | 0.264122  |
| 1  | 4.638457  | -3.444649 | -0.394215 |
| 6  | 1.526989  | -4.443330 | 0.585829  |
| 1  | -0.188886 | -3.132076 | 0.770015  |
| 1  | 3.391726  | -5.481950 | 0.306727  |
| 1  | 0.978632  | -5.334302 | 0.879668  |
| 6  | 0.872989  | -0.834676 | 0.075949  |
| 7  | 0.245132  | 0.137325  | 0.012231  |
| 46 | -0.907773 | 1.829863  | -0.105908 |

|    |           |           |           |
|----|-----------|-----------|-----------|
| 6  | -2.882959 | 5.636874  | -0.638336 |
| 6  | -1.843748 | 4.561372  | -0.611139 |
| 8  | -0.686905 | 4.846064  | -1.031203 |
| 8  | -2.186899 | 3.425737  | -0.163731 |
| 1  | 1.217163  | 3.460811  | 1.419910  |
| 1  | -3.847020 | 5.270920  | -0.282412 |
| 1  | -2.547773 | 6.470214  | -0.012393 |
| 1  | -2.979355 | 6.015231  | -1.660914 |
| 8  | 5.915932  | -1.117659 | 0.405346  |
| 8  | 3.606507  | -1.037908 | -0.609599 |
| 16 | 4.669055  | -0.373958 | 0.467485  |
| 1  | 5.582116  | 1.742616  | 0.290220  |
| 1  | 5.349784  | 0.984688  | -1.307164 |
| 6  | -3.862589 | -0.427036 | 2.068659  |
| 6  | -2.649476 | 0.430080  | 1.666482  |
| 8  | -1.859651 | 0.817938  | 2.530862  |
| 8  | -2.598816 | 0.717917  | 0.412579  |
| 1  | -4.691304 | 0.284376  | 2.185944  |
| 7  | -4.267838 | -1.330941 | 1.002269  |
| 1  | -5.076940 | -1.077536 | 0.450114  |
| 6  | -3.324595 | -2.065888 | 0.357438  |
| 8  | -2.192423 | -2.246998 | 0.785565  |
| 6  | -3.646943 | -1.148381 | 3.385654  |
| 1  | -4.545133 | -1.715738 | 3.652008  |
| 1  | -2.803601 | -1.843489 | 3.318030  |
| 1  | -3.437198 | -0.434538 | 4.186954  |
| 8  | -3.824717 | -2.567003 | -0.780101 |
| 6  | -2.968077 | -3.246811 | -1.754604 |
| 6  | -2.482591 | -4.569021 | -1.190240 |
| 1  | -1.929811 | -5.113945 | -1.965340 |
| 1  | -1.821596 | -4.425920 | -0.330566 |
| 1  | -3.333443 | -5.188149 | -0.880972 |
| 6  | -1.831054 | -2.332630 | -2.179806 |
| 1  | -1.056170 | -2.248195 | -1.412948 |
| 1  | -1.369947 | -2.729512 | -3.092172 |
| 1  | -2.213754 | -1.327237 | -2.399367 |
| 6  | -3.915731 | -3.479759 | -2.916467 |
| 1  | -4.277960 | -2.526499 | -3.319579 |
| 1  | -3.400963 | -4.020477 | -3.718564 |
| 1  | -4.781232 | -4.073624 | -2.599653 |

-----  
---  
*para-C'*  
-----  
---

Number of imaginary frequencies : 1

The smallest frequency is : -1527.2149 cm(-1)

Electronic energy : =-2012.8447449  
Zero-point correction= 0.431793  
Thermal correction to Energy= 0.463483  
Thermal correction to Enthalpy= 0.464427  
Thermal correction to Gibbs Free Energy= 0.369261  
Sum of electronic and zero-point Energies= -2012.412952  
Sum of electronic and thermal Energies= -2012.381262  
Sum of electronic and thermal Enthalpies= -2012.380318  
Sum of electronic and thermal Free Energies= -2012.475483

.....  
Cartesian Coordinates  
.....

|    |           |           |           |
|----|-----------|-----------|-----------|
| 46 | -0.938631 | 0.763382  | -0.153569 |
| 6  | 0.120565  | -1.819918 | -1.088913 |
| 6  | -0.480855 | -1.324852 | 0.084923  |
| 6  | 0.170622  | -1.542126 | 1.314169  |
| 6  | 1.409964  | -2.161792 | 1.360999  |
| 6  | 2.017904  | -2.584271 | 0.175321  |
| 6  | 1.352830  | -2.453522 | -1.047961 |
| 1  | 1.935609  | -2.286972 | 2.306450  |
| 1  | -0.286338 | -1.183813 | 2.235766  |
| 1  | -1.807313 | -1.420014 | 0.061960  |
| 1  | 1.824340  | -2.811711 | -1.961771 |
| 6  | 3.427767  | -3.075028 | 0.208422  |
| 8  | 4.234807  | -1.257264 | -1.620726 |
| 6  | 4.580976  | 0.634781  | 0.536053  |
| 6  | 3.636076  | 1.583038  | 0.115810  |
| 6  | 5.906657  | 0.987160  | 0.716420  |
| 6  | 4.043510  | 2.902201  | -0.125008 |
| 6  | 6.298576  | 2.299709  | 0.466725  |
| 1  | 6.616768  | 0.240931  | 1.061564  |
| 6  | 5.374341  | 3.251951  | 0.045768  |
| 1  | 3.307333  | 3.634392  | -0.445320 |
| 1  | 7.339378  | 2.578468  | 0.608676  |
| 1  | 5.689378  | 4.273933  | -0.144108 |
| 6  | 2.261307  | 1.249732  | -0.036374 |
| 7  | 1.123550  | 1.059953  | -0.150815 |
| 6  | -3.605399 | 1.959991  | -0.091269 |
| 6  | -2.613978 | 3.065963  | -0.428111 |
| 8  | -1.351548 | 2.762086  | -0.456700 |
| 8  | -3.025739 | 4.208345  | -0.616677 |
| 1  | -4.393531 | 1.984565  | -0.857144 |
| 7  | -2.933452 | 0.661227  | -0.111195 |
| 6  | -3.618501 | -0.469351 | -0.098745 |
| 8  | -3.067694 | -1.611434 | -0.034090 |
| 1  | -0.383869 | -1.684022 | -2.045291 |
| 8  | 4.155712  | -0.658603 | 0.807688  |

|    |           |           |           |
|----|-----------|-----------|-----------|
| 8  | 5.937374  | -2.227662 | -0.057170 |
| 1  | 3.624063  | -3.897741 | -0.491192 |
| 1  | 3.764020  | -3.374406 | 1.207495  |
| 16 | 4.573234  | -1.798848 | -0.315104 |
| 6  | -4.213137 | 2.268465  | 1.272946  |
| 1  | -4.701248 | 3.248287  | 1.252653  |
| 1  | -4.956871 | 1.512957  | 1.547721  |
| 1  | -3.429021 | 2.284986  | 2.041165  |
| 8  | -4.937115 | -0.343522 | -0.179702 |
| 6  | -5.869931 | -1.459454 | 0.071641  |
| 6  | -7.218436 | -0.771902 | -0.026920 |
| 1  | -8.019536 | -1.499818 | 0.142777  |
| 1  | -7.308526 | 0.022022  | 0.724275  |
| 1  | -7.359078 | -0.330109 | -1.020337 |
| 6  | -5.729151 | -2.515782 | -1.006675 |
| 1  | -5.811635 | -2.060675 | -2.000980 |
| 1  | -4.777977 | -3.049821 | -0.939014 |
| 1  | -6.541395 | -3.245088 | -0.901026 |
| 6  | -5.649617 | -2.002733 | 1.469796  |
| 1  | -4.693843 | -2.525208 | 1.564504  |
| 1  | -5.684270 | -1.190567 | 2.206926  |
| 1  | -6.450767 | -2.711952 | 1.709076  |

-----  
---  
*para-D'*  
-----  
---

Number of imaginary frequencies : 1  
The smallest frequency is : -1804.2962 cm(-1)

Electronic energy : =-2241.8285368  
Zero-point correction= 0.496104  
Thermal correction to Energy= 0.533251  
Thermal correction to Enthalpy= 0.534195  
Thermal correction to Gibbs Free Energy= 0.427309  
Sum of electronic and zero-point Energies= -2241.332433  
Sum of electronic and thermal Energies= -2241.295286  
Sum of electronic and thermal Enthalpies= -2241.294342  
Sum of electronic and thermal Free Energies= -2241.401228

.....  
Cartesian Coordinates  
.....

|    |           |           |           |
|----|-----------|-----------|-----------|
| 46 | 0.809999  | 0.838476  | -0.207241 |
| 6  | -0.040282 | -1.801861 | 0.698183  |
| 6  | 0.513692  | -1.275715 | -0.492411 |
| 6  | -0.251100 | -1.379805 | -1.679855 |

S231

|    |           |           |           |
|----|-----------|-----------|-----------|
| 6  | -1.512196 | -1.950160 | -1.672038 |
| 6  | -2.038252 | -2.444501 | -0.472776 |
| 6  | -1.290305 | -2.397656 | 0.709378  |
| 1  | 0.538353  | -1.738924 | 1.620989  |
| 8  | 2.722818  | -2.543007 | -0.935936 |
| 1  | -2.107533 | -2.005663 | -2.581835 |
| 1  | 0.170148  | -1.000394 | -2.612202 |
| 1  | 1.727408  | -1.686658 | -0.672585 |
| 1  | -1.707523 | -2.802878 | 1.629368  |
| 6  | -3.434418 | -2.977208 | -0.451811 |
| 8  | -4.138194 | -1.438952 | 1.646859  |
| 6  | -4.719412 | 0.682538  | -0.204391 |
| 6  | -3.728724 | 1.582877  | 0.211840  |
| 6  | -6.057486 | 1.028661  | -0.163696 |
| 6  | -4.097969 | 2.852871  | 0.672741  |
| 6  | -6.412431 | 2.291204  | 0.304737  |
| 1  | -6.804781 | 0.317921  | -0.506123 |
| 6  | -5.440660 | 3.197504  | 0.721298  |
| 1  | -3.326144 | 3.549573  | 0.987885  |
| 1  | -7.462558 | 2.568807  | 0.337708  |
| 1  | -5.730146 | 4.180757  | 1.080581  |
| 6  | -2.354038 | 1.228704  | 0.145380  |
| 7  | -1.221965 | 0.989469  | 0.088458  |
| 6  | 4.435449  | -3.174129 | -2.431453 |
| 6  | 3.475354  | -2.148055 | -1.893124 |
| 8  | 3.467649  | -0.991373 | -2.364791 |
| 6  | 3.076308  | 2.306752  | -1.167287 |
| 6  | 2.140737  | 3.340276  | -0.550448 |
| 8  | 1.040663  | 2.894785  | -0.023893 |
| 8  | 2.420283  | 4.532249  | -0.627525 |
| 1  | 4.109981  | 2.620818  | -0.979816 |
| 1  | 5.242992  | -3.317001 | -1.703166 |
| 1  | 3.939625  | -4.141040 | -2.559505 |
| 1  | 4.871507  | -2.843913 | -3.377455 |
| 7  | 2.858816  | 0.975139  | -0.544052 |
| 1  | 3.109438  | 0.186757  | -1.190511 |
| 6  | 3.450885  | 0.829819  | 0.750908  |
| 8  | 3.758857  | 1.783211  | 1.429403  |
| 16 | -4.578425 | -1.837434 | 0.320692  |
| 8  | -4.323194 | -0.554645 | -0.692106 |
| 8  | -5.940507 | -2.305375 | 0.133744  |
| 1  | -3.540433 | -3.891204 | 0.147080  |
| 1  | -3.842210 | -3.164708 | -1.451614 |
| 6  | 2.821268  | 2.215303  | -2.661961 |
| 1  | 2.927531  | 3.209841  | -3.106539 |
| 1  | 3.537421  | 1.541583  | -3.141976 |
| 1  | 1.805755  | 1.849513  | -2.866185 |
| 8  | 3.567492  | -0.449766 | 1.029062  |
| 6  | 3.992001  | -0.917537 | 2.367773  |



|   |          |           |          |
|---|----------|-----------|----------|
| 6 | 3.009916 | -0.409397 | 3.404057 |
| 1 | 3.221269 | -0.893839 | 4.364498 |
| 1 | 3.080195 | 0.672837  | 3.545229 |
| 1 | 1.981351 | -0.663410 | 3.115888 |
| 6 | 5.417780 | -0.478053 | 2.634297 |
| 1 | 5.769815 | -0.958900 | 3.554528 |
| 1 | 6.076438 | -0.790523 | 1.815286 |
| 1 | 5.499034 | 0.604729  | 2.761973 |
| 6 | 3.907214 | -2.423895 | 2.226810 |
| 1 | 4.222048 | -2.897914 | 3.162969 |
| 1 | 2.881331 | -2.740988 | 2.002185 |
| 1 | 4.559647 | -2.776634 | 1.419071 |

-----  
 ---  
*para-F'*  
 -----  
 ---

Number of imaginary frequencies : 1  
 The smallest frequency is : -1325.6085 cm(-1)

Electronic energy : =-2241.8317567  
 Zero-point correction= 0.494132  
 Thermal correction to Energy= 0.532554  
 Thermal correction to Enthalpy= 0.533498  
 Thermal correction to Gibbs Free Energy= 0.420069  
 Sum of electronic and zero-point Energies= -2241.337625  
 Sum of electronic and thermal Energies= -2241.299203  
 Sum of electronic and thermal Enthalpies= -2241.298258  
 Sum of electronic and thermal Free Energies= -2241.411687

.....  
 Cartesian Coordinates  
 .....

|   |           |           |           |
|---|-----------|-----------|-----------|
| 6 | -1.917144 | -2.369694 | -1.281435 |
| 6 | -0.858416 | -1.480962 | -1.367906 |
| 6 | -0.227024 | -1.002098 | -0.204040 |
| 6 | -0.638462 | -1.503544 | 1.044409  |
| 6 | -1.686947 | -2.406586 | 1.134755  |
| 6 | -2.358632 | -2.799995 | -0.026682 |
| 1 | -2.442908 | -2.700044 | -2.176036 |
| 1 | -0.536971 | -1.115472 | -2.342384 |
| 1 | 1.099936  | -0.817602 | -0.327603 |
| 1 | -2.021170 | -2.772702 | 2.103933  |
| 6 | -3.626202 | -3.581719 | 0.069526  |
| 8 | -4.754599 | -1.807593 | 1.769029  |
| 6 | -5.546929 | -0.237350 | -0.526989 |
| 6 | -4.806466 | 0.929077  | -0.283606 |

|    |           |           |           |
|----|-----------|-----------|-----------|
| 6  | -6.925855 | -0.192100 | -0.631080 |
| 6  | -5.474531 | 2.153905  | -0.147786 |
| 6  | -7.577000 | 1.029712  | -0.484052 |
| 1  | -7.477424 | -1.105298 | -0.837143 |
| 6  | -6.857025 | 2.196777  | -0.243325 |
| 1  | -4.895590 | 3.055401  | 0.033823  |
| 1  | -8.659981 | 1.067030  | -0.565744 |
| 1  | -7.373675 | 3.145928  | -0.134142 |
| 6  | -3.386288 | 0.910140  | -0.205167 |
| 7  | -2.230721 | 0.980967  | -0.159107 |
| 46 | -0.190048 | 1.140300  | -0.184535 |
| 8  | 1.841840  | 1.447544  | -0.209462 |
| 6  | 2.663249  | 0.499374  | -0.341248 |
| 8  | 2.357202  | -0.721965 | -0.432628 |
| 6  | 4.119220  | 0.901095  | -0.443595 |
| 1  | 4.331093  | 1.556521  | 0.410785  |
| 6  | 6.269902  | -0.146528 | 0.013001  |
| 8  | 6.784688  | 0.904964  | 0.368501  |
| 7  | 4.967802  | -0.263930 | -0.347620 |
| 8  | -4.868529 | -1.434120 | -0.704894 |
| 16 | -5.003975 | -2.527626 | 0.531568  |
| 8  | -6.252070 | -3.254338 | 0.372652  |
| 1  | -3.925569 | -4.049183 | -0.875360 |
| 1  | -3.615997 | -4.348035 | 0.855570  |
| 1  | -0.147431 | -1.153766 | 1.951627  |
| 1  | 4.629454  | -1.152229 | -0.696180 |
| 6  | 4.334503  | 1.681242  | -1.738442 |
| 1  | 5.384578  | 1.982601  | -1.805074 |
| 1  | 4.093623  | 1.057600  | -2.607572 |
| 1  | 3.711955  | 2.580882  | -1.763058 |
| 8  | 6.877191  | -1.338380 | -0.069693 |
| 6  | 8.300459  | -1.495090 | 0.245157  |
| 6  | 8.531301  | -2.973788 | -0.003993 |
| 1  | 8.312234  | -3.231469 | -1.046997 |
| 1  | 9.576974  | -3.228393 | 0.202762  |
| 1  | 7.892666  | -3.583710 | 0.645982  |
| 6  | 9.142455  | -0.663164 | -0.704526 |
| 1  | 8.886728  | -0.895471 | -1.745495 |
| 1  | 9.009882  | 0.409110  | -0.538885 |
| 1  | 10.201084 | -0.906423 | -0.553721 |
| 6  | 8.555571  | -1.157583 | 1.702273  |
| 1  | 7.890420  | -1.740963 | 2.350511  |
| 1  | 9.590280  | -1.416595 | 1.957652  |
| 1  | 8.406197  | -0.094254 | 1.907270  |
| 8  | -0.356663 | 3.223257  | -0.260232 |
| 6  | -0.263198 | 3.771465  | 0.907543  |
| 8  | -0.129712 | 3.155763  | 1.970067  |
| 6  | -0.316497 | 5.279688  | 0.874147  |
| 1  | -0.356263 | 5.686178  | 1.887573  |

|   |           |          |          |
|---|-----------|----------|----------|
| 1 | 0.574367  | 5.665086 | 0.365863 |
| 1 | -1.187293 | 5.619515 | 0.304292 |

-----  
---  
Possibilities of RE Transition States for the *meta* Product at the SMD/M06/6-31G\*\* Level of Theory  
-----  
---

conf-2' (6-coordination)  
-----  
---

Number of imaginary frequencies : 1  
The smallest frequency is : -278.7569 cm(-1)

Electronic energy :       =-2698.5139174  
Zero-point correction=               0.603858  
Thermal correction to Energy=        0.651051  
Thermal correction to Enthalpy=       0.651995  
Thermal correction to Gibbs Free Energy=   0.525780  
Sum of electronic and zero-point Energies=   -2697.910059  
Sum of electronic and thermal Energies=   -2697.862867  
Sum of electronic and thermal Enthalpies=   -2697.861923  
Sum of electronic and thermal Free Energies=   -2697.988138

-----  
                  Cartesian Coordinates  
-----

|    |           |           |           |
|----|-----------|-----------|-----------|
| 46 | -2.047633 | -0.283824 | -0.090816 |
| 6  | -2.811123 | 3.714983  | -1.309385 |
| 6  | -2.960431 | 2.324042  | -1.341433 |
| 6  | -1.780766 | 1.637739  | -1.218258 |
| 6  | -0.504846 | 2.130904  | -1.257631 |
| 6  | -0.401532 | 3.526142  | -1.196126 |
| 6  | -1.556502 | 4.307341  | -1.210303 |
| 1  | 0.374423  | 1.497194  | -1.299165 |
| 1  | -3.937536 | 1.857781  | -1.390122 |
| 1  | -1.470617 | 5.390498  | -1.165579 |
| 6  | 0.954145  | 4.151811  | -1.099249 |
| 1  | 0.904344  | 5.247000  | -1.117256 |
| 1  | 1.648393  | 3.829100  | -1.884947 |
| 8  | 0.890269  | 3.627575  | 1.560492  |
| 6  | 2.942871  | 1.531494  | 1.047524  |
| 6  | 2.245903  | 0.413430  | 1.530817  |
| 6  | 4.203278  | 1.839385  | 1.528292  |
| 6  | 2.832639  | -0.414240 | 2.495536  |
| 6  | 4.766019  | 1.023709  | 2.508492  |
| 1  | 4.737101  | 2.698214  | 1.131443  |

|    |           |           |           |
|----|-----------|-----------|-----------|
| 6  | 4.091044  | -0.097809 | 2.985466  |
| 1  | 2.290321  | -1.287382 | 2.849188  |
| 1  | 5.753955  | 1.264096  | 2.892240  |
| 1  | 4.550043  | -0.732014 | 3.738109  |
| 6  | 0.938397  | 0.153084  | 1.044542  |
| 7  | -0.127669 | -0.019529 | 0.631780  |
| 6  | 0.464138  | -3.663164 | 0.421934  |
| 6  | -0.974518 | -3.231555 | 0.053966  |
| 8  | -1.670089 | -2.745065 | 1.001952  |
| 8  | -1.309733 | -3.329679 | -1.137628 |
| 1  | 0.646190  | -4.634261 | -0.065739 |
| 7  | 1.322819  | -2.653458 | -0.193132 |
| 6  | 2.667861  | -2.760911 | -0.278743 |
| 8  | 3.334201  | -3.683235 | 0.173600  |
| 1  | -3.707683 | 4.328638  | -1.347212 |
| 8  | 2.357554  | 2.280378  | 0.034577  |
| 8  | 2.949504  | 4.672112  | 0.575017  |
| 16 | 1.803657  | 3.789992  | 0.442689  |
| 8  | -3.868250 | -0.806279 | -0.701103 |
| 6  | -4.962961 | -0.259100 | -0.229243 |
| 8  | -5.014769 | 0.721974  | 0.500330  |
| 8  | -1.794123 | -0.245635 | -2.138093 |
| 6  | -0.657781 | -0.615407 | -2.720799 |
| 8  | 0.436699  | -0.625930 | -2.183585 |
| 6  | -0.900111 | -1.027520 | -4.141085 |
| 1  | -1.513429 | -0.286683 | -4.661775 |
| 1  | 0.055053  | -1.164409 | -4.652443 |
| 1  | -1.452682 | -1.974057 | -4.137945 |
| 6  | -6.184066 | -1.015907 | -0.679619 |
| 1  | -6.246858 | -1.944730 | -0.100542 |
| 1  | -7.078095 | -0.415664 | -0.495161 |
| 1  | -6.117837 | -1.287755 | -1.736355 |
| 6  | 0.704883  | -3.784140 | 1.911819  |
| 1  | 1.743828  | -4.060864 | 2.116279  |
| 1  | 0.481265  | -2.837632 | 2.417310  |
| 1  | 0.053895  | -4.553999 | 2.341317  |
| 8  | 3.154400  | -1.674260 | -0.911302 |
| 6  | 4.539193  | -1.605939 | -1.370064 |
| 6  | 4.570556  | -0.288040 | -2.123552 |
| 1  | 5.569910  | -0.113698 | -2.538680 |
| 1  | 3.846060  | -0.297075 | -2.946937 |
| 1  | 4.323660  | 0.549823  | -1.457500 |
| 6  | 4.833924  | -2.760403 | -2.312005 |
| 1  | 5.811166  | -2.605536 | -2.784998 |
| 1  | 4.856043  | -3.720076 | -1.788300 |
| 1  | 4.076848  | -2.808193 | -3.104231 |
| 6  | 5.487931  | -1.563813 | -0.187309 |
| 1  | 6.516637  | -1.447925 | -0.550483 |
| 1  | 5.257671  | -0.704119 | 0.454785  |

|   |           |           |           |
|---|-----------|-----------|-----------|
| 1 | 5.430177  | -2.478849 | 0.409433  |
| 1 | 0.896391  | -1.956306 | -0.798459 |
| 8 | -2.613207 | 0.039634  | 1.920948  |
| 6 | -3.433782 | -0.668151 | 2.543835  |
| 8 | -3.720707 | -1.894361 | 2.240022  |
| 6 | -4.159396 | -0.110206 | 3.710486  |
| 1 | -5.235058 | -0.187689 | 3.516347  |
| 1 | -3.940621 | -0.709743 | 4.599839  |
| 1 | -3.886031 | 0.932392  | 3.875285  |
| 1 | -3.054196 | -2.283536 | 1.576973  |

-----  
 ---  
 conf-1' (6-coordination)  
 -----  
 ---

Number of imaginary frequencies : 1  
 The smallest frequency is : -318.4065 cm(-1)

Electronic energy : =-2469.5222936  
 Zero-point correction= 0.540602  
 Thermal correction to Energy= 0.581848  
 Thermal correction to Enthalpy= 0.582792  
 Thermal correction to Gibbs Free Energy= 0.469318  
 Sum of electronic and zero-point Energies= -2468.981692  
 Sum of electronic and thermal Energies= -2468.940446  
 Sum of electronic and thermal Enthalpies= -2468.939502  
 Sum of electronic and thermal Free Energies= -2469.052976

.....  
 Cartesian Coordinates  
 .....

|    |           |           |           |
|----|-----------|-----------|-----------|
| 46 | -1.620861 | -0.570960 | 0.675565  |
| 6  | -1.171109 | -2.163470 | -3.282216 |
| 6  | -1.840465 | -2.008619 | -2.068582 |
| 6  | -1.038508 | -1.950573 | -0.948290 |
| 6  | 0.300889  | -2.255570 | -0.910366 |
| 6  | 0.949679  | -2.362010 | -2.145856 |
| 6  | 0.214836  | -2.296283 | -3.326961 |
| 1  | 0.850361  | -2.362425 | 0.016992  |
| 1  | -1.489623 | 0.761589  | -1.805314 |
| 1  | -2.919458 | -1.910232 | -2.026200 |
| 1  | 0.725326  | -2.380247 | -4.283740 |
| 6  | 2.437987  | -2.502410 | -2.172088 |
| 1  | 2.828343  | -2.569020 | -3.194396 |
| 1  | 2.816945  | -3.361074 | -1.603609 |
| 8  | 2.508142  | 0.145235  | -1.565915 |
| 6  | 3.712307  | -0.628762 | 1.041512  |

S237

|    |           |           |           |
|----|-----------|-----------|-----------|
| 6  | 2.761328  | -0.016850 | 1.874118  |
| 6  | 5.059480  | -0.353468 | 1.189622  |
| 6  | 3.172099  | 0.881398  | 2.865572  |
| 6  | 5.456425  | 0.547411  | 2.175934  |
| 1  | 5.784075  | -0.847941 | 0.549114  |
| 6  | 4.523020  | 1.160556  | 3.008288  |
| 1  | 2.425748  | 1.344323  | 3.505752  |
| 1  | 6.514233  | 0.765589  | 2.297127  |
| 1  | 4.850757  | 1.856278  | 3.775058  |
| 6  | 1.389013  | -0.316274 | 1.684304  |
| 7  | 0.283565  | -0.603417 | 1.494535  |
| 6  | -1.179967 | 2.281502  | 1.650371  |
| 6  | -1.583942 | 1.511219  | 2.924085  |
| 8  | -2.224228 | 0.427910  | 2.781088  |
| 8  | -1.293431 | 2.069246  | 3.995111  |
| 1  | -0.175054 | 2.688091  | 1.828624  |
| 7  | -1.152269 | 1.438434  | 0.454592  |
| 6  | -0.503905 | 1.816980  | -0.612060 |
| 8  | -0.551048 | 1.135111  | -1.726373 |
| 1  | -1.751701 | -2.170697 | -4.201473 |
| 8  | 3.267329  | -1.556464 | 0.109453  |
| 8  | 4.672660  | -1.074334 | -1.928669 |
| 16 | 3.291345  | -1.076291 | -1.479300 |
| 8  | -3.521293 | -0.281982 | 0.062883  |
| 6  | -3.846921 | 0.386682  | -0.994845 |
| 8  | -3.073256 | 0.796203  | -1.870525 |
| 8  | -2.159662 | -2.596913 | 0.617932  |
| 6  | -1.563268 | -3.504562 | 1.388872  |
| 8  | -0.457561 | -3.385533 | 1.880952  |
| 6  | -2.438335 | -4.712767 | 1.558459  |
| 1  | -2.602626 | -5.186162 | 0.584407  |
| 1  | -1.966387 | -5.423290 | 2.240154  |
| 1  | -3.417150 | -4.414940 | 1.947347  |
| 6  | -5.323233 | 0.648080  | -1.089664 |
| 1  | -5.574630 | 1.471732  | -0.411762 |
| 1  | -5.589191 | 0.932241  | -2.110181 |
| 1  | -5.897428 | -0.226921 | -0.774247 |
| 6  | -2.190896 | 3.405631  | 1.459450  |
| 1  | -1.945520 | 4.023226  | 0.587898  |
| 1  | -3.192885 | 2.979663  | 1.314033  |
| 1  | -2.209735 | 4.043744  | 2.348960  |
| 8  | 0.227189  | 2.902589  | -0.569508 |
| 6  | 0.442530  | 3.777474  | -1.761484 |
| 6  | 0.982470  | 5.043189  | -1.127828 |
| 1  | 1.211199  | 5.775231  | -1.910142 |
| 1  | 0.249263  | 5.486417  | -0.444096 |
| 1  | 1.902772  | 4.836704  | -0.569694 |
| 6  | -0.889054 | 4.035691  | -2.437104 |
| 1  | -0.749928 | 4.799266  | -3.211144 |

|   |           |          |           |
|---|-----------|----------|-----------|
| 1 | -1.300519 | 3.141812 | -2.915882 |
| 1 | -1.619162 | 4.420516 | -1.713810 |
| 6 | 1.473680  | 3.154412 | -2.678630 |
| 1 | 1.700818  | 3.867166 | -3.480661 |
| 1 | 2.402500  | 2.952907 | -2.133031 |
| 1 | 1.122091  | 2.225931 | -3.136241 |

-----  
 ---  
 conf-5' (5- coordination) [6'-7']<sup>‡</sup>  
 -----

---  
 Number of imaginary frequencies : 1  
 The smallest frequency is : -256.0709 cm(-1)

Electronic energy : =-2927.5280552  
 Zero-point correction= 0.669286  
 Thermal correction to Energy= 0.721540  
 Thermal correction to Enthalpy= 0.722484  
 Thermal correction to Gibbs Free Energy= 0.584558  
 Sum of electronic and zero-point Energies= -2926.858769  
 Sum of electronic and thermal Energies= -2926.806515  
 Sum of electronic and thermal Enthalpies= -2926.805571  
 Sum of electronic and thermal Free Energies= -2926.943497

.....  
 Cartesian Coordinates  
 .....

|    |           |           |           |
|----|-----------|-----------|-----------|
| 46 | -1.062094 | -1.977571 | -0.407049 |
| 6  | -4.347213 | -0.764513 | 1.951906  |
| 6  | -3.558034 | -1.621898 | 1.175501  |
| 6  | -3.008418 | -1.022560 | 0.074077  |
| 6  | -3.266904 | 0.219253  | -0.441072 |
| 6  | -4.062212 | 1.042021  | 0.364520  |
| 6  | -4.582926 | 0.549166  | 1.562341  |
| 1  | -2.860052 | 0.571433  | -1.384572 |
| 1  | -3.363311 | -2.651045 | 1.461096  |
| 1  | -5.198796 | 1.196837  | 2.183440  |
| 6  | -4.324391 | 2.446615  | -0.073156 |
| 1  | -5.255990 | 2.850151  | 0.343393  |
| 1  | -4.357237 | 2.564829  | -1.162536 |
| 8  | -2.721526 | 3.419795  | 1.873047  |
| 6  | -0.537241 | 3.348198  | -0.131754 |
| 6  | 0.391848  | 2.299382  | -0.209382 |
| 6  | -0.125602 | 4.628102  | 0.196832  |
| 6  | 1.744932  | 2.540917  | 0.065568  |
| 6  | 1.222344  | 4.854432  | 0.465170  |
| 1  | -0.843578 | 5.443187  | 0.230144  |
| 6  | 2.155036  | 3.821211  | 0.400559  |

|    |           |           |           |
|----|-----------|-----------|-----------|
| 1  | 2.457974  | 1.721363  | 0.008481  |
| 1  | 1.544538  | 5.860161  | 0.721881  |
| 1  | 3.205040  | 4.012763  | 0.604265  |
| 6  | -0.037410 | 0.999589  | -0.576299 |
| 7  | -0.378708 | -0.056865 | -0.915477 |
| 6  | 2.304847  | -1.760513 | -0.599869 |
| 6  | 1.602237  | -1.356683 | 0.697712  |
| 8  | 0.476109  | -1.991041 | 0.958764  |
| 8  | 2.084021  | -0.566894 | 1.494833  |
| 1  | 1.539434  | -1.874559 | -1.379303 |
| 7  | 3.186821  | -0.718092 | -1.095564 |
| 6  | 4.293231  | -0.218187 | -0.503591 |
| 8  | 4.808982  | 0.847645  | -0.865490 |
| 1  | -4.778398 | -1.152297 | 2.871875  |
| 8  | -1.843484 | 3.042079  | -0.462488 |
| 8  | -3.426698 | 4.938819  | 0.004497  |
| 16 | -3.078861 | 3.611055  | 0.479766  |
| 8  | -1.569664 | -3.780841 | 0.319817  |
| 6  | -0.915751 | -4.717503 | -0.317520 |
| 8  | -0.127826 | -4.489435 | -1.232925 |
| 8  | -2.738573 | -2.299197 | -1.551848 |
| 6  | -2.838316 | -1.739272 | -2.757892 |
| 8  | -2.049387 | -0.934922 | -3.213994 |
| 6  | -4.072331 | -2.216750 | -3.463095 |
| 6  | -1.223472 | -6.094388 | 0.194783  |
| 1  | 2.808230  | -0.100544 | -1.817209 |
| 8  | -1.131907 | 0.633096  | 2.079381  |
| 6  | -1.261132 | 0.002749  | 3.112844  |
| 6  | -1.994909 | 0.492754  | 4.318417  |
| 1  | -1.266647 | 0.751455  | 5.095949  |
| 1  | -2.582118 | 1.380145  | 4.068772  |
| 1  | -2.639859 | -0.290951 | 4.727880  |
| 8  | -0.731038 | -1.205718 | 3.292762  |
| 1  | -0.224627 | -1.455112 | 2.475512  |
| 1  | 4.129915  | 1.958998  | -1.951434 |
| 8  | 3.745451  | 2.743548  | -2.433849 |
| 6  | 2.573444  | 2.429865  | -2.959302 |
| 6  | 1.878393  | 3.605276  | -3.558212 |
| 1  | 0.966296  | 3.291582  | -4.068417 |
| 1  | 1.629312  | 4.311122  | -2.755395 |
| 1  | 2.542455  | 4.127854  | -4.253831 |
| 8  | 2.101408  | 1.300421  | -2.928985 |
| 1  | -0.717434 | -6.843583 | -0.417806 |
| 1  | -2.303772 | -6.269178 | 0.183747  |
| 1  | -0.887069 | -6.182184 | 1.233195  |
| 1  | -4.139528 | -3.307973 | -3.430013 |
| 1  | -4.068489 | -1.869063 | -4.498061 |
| 1  | -4.950530 | -1.816698 | -2.942180 |
| 6  | 2.956613  | -3.129076 | -0.406707 |



|   |          |           |           |
|---|----------|-----------|-----------|
| 1 | 3.584390 | -3.363230 | -1.272769 |
| 1 | 3.576661 | -3.164341 | 0.493886  |
| 1 | 2.178491 | -3.895216 | -0.327777 |
| 8 | 4.784387 | -0.997359 | 0.447603  |
| 6 | 5.783208 | -0.521857 | 1.414076  |
| 6 | 7.132491 | -0.409972 | 0.733268  |
| 6 | 5.337289 | 0.783328  | 2.049503  |
| 6 | 5.779109 | -1.637364 | 2.442577  |
| 1 | 7.410473 | -1.364181 | 0.269945  |
| 1 | 7.129418 | 0.367974  | -0.035451 |
| 1 | 7.897018 | -0.157944 | 1.478162  |
| 1 | 4.295877 | 0.709733  | 2.385391  |
| 1 | 5.963702 | 0.982013  | 2.927327  |
| 1 | 5.429918 | 1.632559  | 1.367334  |
| 1 | 6.503509 | -1.423822 | 3.236528  |
| 1 | 4.784087 | -1.735885 | 2.895514  |
| 1 | 6.047430 | -2.594178 | 1.978496  |

-----  
 --  
 [6']  
 -----  
 ---

Number of imaginary frequencies : 0

Electronic energy :        =-2927.5487524  
 Zero-point correction=            0.671701  
 Thermal correction to Energy=        0.724013  
 Thermal correction to Enthalpy=        0.724957  
 Thermal correction to Gibbs Free Energy=    0.588894  
 Sum of electronic and zero-point Energies=    -2926.877051  
 Sum of electronic and thermal Energies=    -2926.824739  
 Sum of electronic and thermal Enthalpies=    -2926.823795  
 Sum of electronic and thermal Free Energies=   -2926.959858

-----  
 Cartesian Coordinates  
 -----

|    |           |           |           |
|----|-----------|-----------|-----------|
| 46 | -0.868153 | -2.158250 | -0.309595 |
| 6  | -3.651614 | -0.893563 | 2.616432  |
| 6  | -2.684459 | -1.658227 | 1.951618  |
| 6  | -2.454386 | -1.305940 | 0.645827  |
| 6  | -3.125015 | -0.347721 | -0.074989 |
| 6  | -4.045703 | 0.431570  | 0.631691  |
| 6  | -4.296158 | 0.158407  | 1.977096  |
| 1  | -2.933983 | -0.150992 | -1.124999 |
| 1  | -2.145501 | -2.453912 | 2.457443  |
| 1  | -5.008625 | 0.773039  | 2.524359  |

|    |           |           |           |
|----|-----------|-----------|-----------|
| 6  | -4.680828 | 1.587910  | -0.069559 |
| 1  | -5.643969 | 1.878363  | 0.369744  |
| 1  | -4.827356 | 1.419992  | -1.142894 |
| 8  | -3.275620 | 3.357899  | 1.400487  |
| 6  | -1.160352 | 3.165351  | -0.596471 |
| 6  | -0.060589 | 2.293507  | -0.552158 |
| 6  | -0.971743 | 4.528035  | -0.442611 |
| 6  | 1.224944  | 2.788560  | -0.294850 |
| 6  | 0.313662  | 5.010597  | -0.205831 |
| 1  | -1.814343 | 5.211348  | -0.511492 |
| 6  | 1.407196  | 4.150852  | -0.124174 |
| 1  | 2.060026  | 2.093605  | -0.231713 |
| 1  | 0.457222  | 6.081007  | -0.084188 |
| 1  | 2.401966  | 4.543004  | 0.067321  |
| 6  | -0.245614 | 0.904824  | -0.743818 |
| 7  | -0.384433 | -0.228157 | -0.954629 |
| 6  | 2.363367  | -1.632706 | -0.206283 |
| 6  | 1.538514  | -1.143266 | 0.985002  |
| 8  | 0.426957  | -1.796773 | 1.266231  |
| 8  | 1.929400  | -0.241038 | 1.712052  |
| 1  | 1.690348  | -2.026505 | -0.978509 |
| 7  | 3.066471  | -0.546376 | -0.869206 |
| 6  | 4.072403  | 0.219140  | -0.392087 |
| 8  | 4.410191  | 1.276451  | -0.940955 |
| 1  | -3.869664 | -1.122058 | 3.657389  |
| 8  | -2.395738 | 2.598598  | -0.843009 |
| 8  | -4.367561 | 4.144940  | -0.719135 |
| 16 | -3.710655 | 3.096505  | 0.041317  |
| 8  | -1.369816 | -3.920425 | 0.488749  |
| 6  | -0.541188 | -4.840360 | 0.054376  |
| 8  | 0.376939  | -4.595895 | -0.723160 |
| 8  | -2.146555 | -2.559824 | -1.823328 |
| 6  | -1.484418 | -2.630799 | -2.955774 |
| 8  | -0.273269 | -2.465252 | -3.048682 |
| 6  | -2.377725 | -2.941877 | -4.121178 |
| 6  | -0.838558 | -6.198734 | 0.611947  |
| 1  | 2.594971  | -0.127723 | -1.675016 |
| 8  | -0.977688 | 1.203521  | 2.049664  |
| 6  | -0.974117 | 0.835573  | 3.209812  |
| 6  | -1.571954 | 1.595214  | 4.347339  |
| 1  | -0.766611 | 2.064952  | 4.924167  |
| 1  | -2.239985 | 2.372615  | 3.971227  |
| 1  | -2.109442 | 0.922804  | 5.022789  |
| 8  | -0.407208 | -0.304426 | 3.605226  |
| 1  | -0.025854 | -0.746685 | 2.811123  |
| 1  | 3.596888  | 2.064684  | -2.217451 |
| 8  | 3.120390  | 2.669045  | -2.851401 |
| 6  | 2.020921  | 2.084622  | -3.296959 |
| 6  | 1.200145  | 2.978436  | -4.163360 |

|   |           |           |           |
|---|-----------|-----------|-----------|
| 1 | 0.382268  | 2.419806  | -4.621110 |
| 1 | 0.788372  | 3.787736  | -3.547217 |
| 1 | 1.823117  | 3.442674  | -4.933904 |
| 8 | 1.700578  | 0.940477  | -3.001315 |
| 1 | -0.119468 | -6.923427 | 0.223972  |
| 1 | -1.855148 | -6.499111 | 0.338995  |
| 1 | -0.785765 | -6.170311 | 1.704958  |
| 1 | -2.841744 | -3.923407 | -3.978521 |
| 1 | -1.793738 | -2.942140 | -5.044184 |
| 1 | -3.182711 | -2.203642 | -4.188923 |
| 6 | 3.233910  | -2.797112 | 0.259750  |
| 1 | 3.916702  | -3.093772 | -0.542985 |
| 1 | 3.820628  | -2.538328 | 1.146087  |
| 1 | 2.593188  | -3.651567 | 0.502476  |
| 8 | 4.675340  | -0.294247 | 0.668841  |
| 6 | 5.565520  | 0.501398  | 1.524955  |
| 6 | 6.883929  | 0.732113  | 0.813712  |
| 6 | 4.886618  | 1.794122  | 1.941326  |
| 6 | 5.745466  | -0.411874 | 2.723490  |
| 1 | 7.323549  | -0.222840 | 0.501707  |
| 1 | 6.759284  | 1.367802  | -0.067235 |
| 1 | 7.586108  | 1.222411  | 1.498848  |
| 1 | 3.875535  | 1.590577  | 2.314102  |
| 1 | 5.462874  | 2.252887  | 2.753569  |
| 1 | 4.823415  | 2.513682  | 1.120377  |
| 1 | 6.421132  | 0.049750  | 3.452260  |
| 1 | 4.779868  | -0.598316 | 3.210599  |
| 1 | 6.173944  | -1.373570 | 2.416225  |

-----  
 ---  
 [7']  
 -----  
 ---

Number of imaginary frequencies : 0

Electronic energy :        =-2927.6075267  
 Zero-point correction=        0.671618  
 Thermal correction to Energy=        0.724227  
 Thermal correction to Enthalpy=        0.725171  
 Thermal correction to Gibbs Free Energy=        0.585909  
 Sum of electronic and zero-point Energies=        -2926.935909  
 Sum of electronic and thermal Energies=        -2926.883300  
 Sum of electronic and thermal Enthalpies=        -2926.882355  
 Sum of electronic and thermal Free Energies=        -2927.021617

.....  
 Cartesian Coordinates

S243

.....

|    |           |           |           |
|----|-----------|-----------|-----------|
| 46 | -0.862314 | -1.951901 | -0.326919 |
| 6  | -4.843629 | -0.404218 | 1.500735  |
| 6  | -4.182009 | -1.301054 | 0.668856  |
| 6  | -3.583600 | -0.802547 | -0.477516 |
| 6  | -3.610003 | 0.535232  | -0.826281 |
| 6  | -4.269397 | 1.424534  | 0.020522  |
| 6  | -4.878493 | 0.949978  | 1.183475  |
| 1  | -3.103401 | 0.869670  | -1.730044 |
| 1  | -4.109729 | -2.362137 | 0.900276  |
| 1  | -5.383999 | 1.651552  | 1.844897  |
| 6  | -4.307558 | 2.880848  | -0.308034 |
| 1  | -5.205512 | 3.376573  | 0.082444  |
| 1  | -4.240072 | 3.091738  | -1.381735 |
| 8  | -2.741385 | 3.466554  | 1.816311  |
| 6  | -0.442390 | 3.435944  | -0.106951 |
| 6  | 0.447989  | 2.351849  | -0.145196 |
| 6  | 0.012728  | 4.701882  | 0.224451  |
| 6  | 1.803561  | 2.545683  | 0.160937  |
| 6  | 1.359584  | 4.878643  | 0.531103  |
| 1  | -0.669507 | 5.546764  | 0.229066  |
| 6  | 2.254131  | 3.811236  | 0.498737  |
| 1  | 2.481393  | 1.694422  | 0.126742  |
| 1  | 1.712209  | 5.873822  | 0.789023  |
| 1  | 3.305007  | 3.965299  | 0.727321  |
| 6  | 0.005750  | 1.054191  | -0.502810 |
| 7  | -0.299116 | -0.023329 | -0.806948 |
| 6  | 2.480124  | -1.773246 | -0.665474 |
| 6  | 1.797952  | -1.376276 | 0.644211  |
| 8  | 0.725449  | -2.075562 | 0.954235  |
| 8  | 2.245258  | -0.522242 | 1.395514  |
| 1  | 1.697371  | -1.878937 | -1.428664 |
| 7  | 3.352511  | -0.726558 | -1.168909 |
| 6  | 4.449040  | -0.218191 | -0.565538 |
| 8  | 4.953179  | 0.858724  | -0.910267 |
| 1  | -5.324625 | -0.762793 | 2.407041  |
| 8  | -1.749138 | 3.184668  | -0.481963 |
| 8  | -3.133397 | 5.221808  | 0.065994  |
| 16 | -2.977176 | 3.823068  | 0.429010  |
| 8  | -1.465122 | -3.730329 | 0.343330  |
| 6  | -0.856247 | -4.749821 | -0.202887 |
| 8  | -0.004242 | -4.664426 | -1.083635 |
| 8  | -2.790927 | -1.663011 | -1.258965 |
| 6  | -3.291474 | -2.530086 | -2.223149 |
| 8  | -2.505717 | -3.282647 | -2.726194 |
| 6  | -4.737364 | -2.388866 | -2.523273 |
| 6  | -1.293972 | -6.064558 | 0.382922  |
| 1  | 2.942235  | -0.084026 | -1.850954 |
| 8  | -1.513243 | 0.459401  | 1.910702  |

|   |           |           |           |
|---|-----------|-----------|-----------|
| 6 | -1.537559 | -0.205720 | 2.930703  |
| 6 | -2.397487 | 0.088911  | 4.116203  |
| 1 | -1.760894 | 0.314225  | 4.979330  |
| 1 | -3.046515 | 0.942731  | 3.911554  |
| 1 | -2.994962 | -0.789904 | 4.380521  |
| 8 | -0.786762 | -1.289764 | 3.116609  |
| 1 | -0.200453 | -1.445847 | 2.331723  |
| 1 | 4.209254  | 1.993743  | -1.919602 |
| 8 | 3.794174  | 2.787632  | -2.361054 |
| 6 | 2.611485  | 2.474333  | -2.859924 |
| 6 | 1.892873  | 3.653073  | -3.423761 |
| 1 | 0.924085  | 3.351312  | -3.825418 |
| 1 | 1.753373  | 4.401265  | -2.633841 |
| 1 | 2.495844  | 4.120839  | -4.209112 |
| 8 | 2.150850  | 1.339584  | -2.844565 |
| 1 | -0.995975 | -6.885711 | -0.273295 |
| 1 | -2.375560 | -6.084337 | 0.543947  |
| 1 | -0.812575 | -6.197683 | 1.358474  |
| 1 | -5.337060 | -2.639324 | -1.641272 |
| 1 | -4.988353 | -3.065226 | -3.341111 |
| 1 | -4.973489 | -1.356844 | -2.804839 |
| 6 | 3.131126  | -3.145892 | -0.499296 |
| 1 | 3.755042  | -3.365521 | -1.372023 |
| 1 | 3.756296  | -3.198540 | 0.397309  |
| 1 | 2.351603  | -3.912271 | -0.430572 |
| 8 | 4.946629  | -1.006014 | 0.375700  |
| 6 | 5.944257  | -0.538593 | 1.346515  |
| 6 | 7.294370  | -0.430637 | 0.666935  |
| 6 | 5.507494  | 0.766592  | 1.988823  |
| 6 | 5.930593  | -1.658010 | 2.370726  |
| 1 | 7.571534  | -1.386197 | 0.205979  |
| 1 | 7.291606  | 0.345447  | -0.104018 |
| 1 | 8.059066  | -0.176892 | 1.411086  |
| 1 | 4.463185  | 0.702081  | 2.317460  |
| 1 | 6.129735  | 0.949974  | 2.872902  |
| 1 | 5.615242  | 1.620361  | 1.314915  |
| 1 | 6.653163  | -1.452127 | 3.168375  |
| 1 | 4.932556  | -1.751376 | 2.818524  |
| 1 | 6.194294  | -2.614829 | 1.904073  |

-----  
 ---  
**Acetoxylation product using Boc-Ala-OH (M06/6-31G\*\*)**  
 -----  
 ---

[Pd(OAc)<sub>2</sub>]<sub>3</sub>

S245

-----  
---  
Number of imaginary frequencies : 0

Electronic energy :        =-1750.5747527  
Zero-point correction=            0.315721  
Thermal correction to Energy=        0.349705  
Thermal correction to Enthalpy=        0.350649  
Thermal correction to Gibbs Free Energy=    0.246602  
Sum of electronic and zero-point Energies=   -1750.259032  
Sum of electronic and thermal Energies=   -1750.225048  
Sum of electronic and thermal Enthalpies=   -1750.224104  
Sum of electronic and thermal Free Energies=  -1750.328150

-----  
                  Cartesian Coordinates  
-----

|    |           |           |           |
|----|-----------|-----------|-----------|
| 46 | 1.559037  | 0.928514  | -0.001488 |
| 8  | 2.288923  | 0.035247  | -1.687034 |
| 8  | 2.647809  | -0.307202 | 1.230488  |
| 6  | 2.237849  | -1.316722 | 1.863936  |
| 8  | 1.167662  | -1.961746 | 1.678836  |
| 46 | 0.023733  | -1.809013 | -0.005073 |
| 6  | 2.293810  | -1.213956 | -1.872974 |
| 8  | 1.643990  | -2.088612 | -1.240602 |
| 8  | 1.121000  | 1.989958  | 1.685653  |
| 8  | 0.987212  | 2.468094  | -1.238768 |
| 6  | -0.097355 | 2.595324  | -1.866543 |
| 8  | -1.177725 | 1.970204  | -1.674795 |
| 46 | -1.584818 | 0.884530  | 0.004864  |
| 6  | 0.023813  | 2.584005  | 1.881424  |
| 8  | -1.056834 | 2.431774  | 1.252415  |
| 8  | -2.292781 | -0.036952 | 1.684456  |
| 8  | -2.637838 | -0.371229 | -1.237573 |
| 6  | -2.258257 | -1.285446 | 1.868666  |
| 6  | -2.201320 | -1.367910 | -1.873886 |
| 8  | -1.586272 | -2.139520 | 1.230445  |
| 8  | -1.115966 | -1.986972 | -1.689102 |
| 6  | 3.211147  | -1.714141 | -2.954887 |
| 1  | 4.199552  | -1.887537 | -2.516001 |
| 1  | 2.841563  | -2.655565 | -3.365126 |
| 1  | 3.317396  | -0.959703 | -3.737086 |
| 6  | -0.122286 | 3.635851  | -2.952546 |
| 1  | -0.414387 | 4.592792  | -2.507050 |
| 1  | 0.869108  | 3.748845  | -3.395060 |
| 1  | -0.863046 | 3.373594  | -3.710443 |
| 6  | 0.023207  | 3.615209  | 2.976519  |
| 1  | -0.981076 | 3.739542  | 3.385116  |
| 1  | 0.731778  | 3.332597  | 3.757816  |

|   |           |           |           |
|---|-----------|-----------|-----------|
| 1 | 0.350769  | 4.570525  | 2.552863  |
| 6 | -3.146918 | -1.821609 | 2.957425  |
| 1 | -2.653970 | -2.649810 | 3.470838  |
| 1 | -3.413998 | -1.029045 | 3.658558  |
| 1 | -4.064063 | -2.205104 | 2.497903  |
| 6 | -3.092000 | -1.901618 | -2.962005 |
| 1 | -3.830496 | -2.570373 | -2.507229 |
| 1 | -3.626655 | -1.083012 | -3.447853 |
| 1 | -2.508404 | -2.473334 | -3.685744 |
| 6 | 3.143996  | -1.833103 | 2.947659  |
| 1 | 3.668480  | -1.005122 | 3.428560  |
| 1 | 2.574299  | -2.412786 | 3.676207  |
| 1 | 3.889791  | -2.491572 | 2.489745  |

-----  
 ---  
 HFIP (Solvent)  
 -----  
 ---

Number of imaginary frequencies : 0

Electronic energy : =-789.5215432  
 Zero-point correction= 0.063922  
 Thermal correction to Energy= 0.072851  
 Thermal correction to Enthalpy= 0.073796  
 Thermal correction to Gibbs Free Energy= 0.029116  
 Sum of electronic and zero-point Energies= -789.457621  
 Sum of electronic and thermal Energies= -789.448692  
 Sum of electronic and thermal Enthalpies= -789.447748  
 Sum of electronic and thermal Free Energies= -789.492427

.....  
 Cartesian Coordinates  
 .....

|   |           |           |           |
|---|-----------|-----------|-----------|
| 6 | -1.283718 | -0.135145 | -0.030927 |
| 6 | -0.002832 | 0.543010  | -0.499026 |
| 6 | 1.262325  | -0.164874 | -0.025539 |
| 1 | -0.002373 | 0.474571  | -1.600544 |
| 9 | -1.459539 | -0.025204 | 1.278021  |
| 9 | -2.325072 | 0.424648  | -0.642096 |
| 9 | -1.260249 | -1.431296 | -0.348226 |
| 9 | 1.262895  | -0.395792 | 1.279938  |
| 9 | 1.448777  | -1.315253 | -0.664941 |
| 9 | 2.307693  | 0.632968  | -0.303658 |
| 8 | -0.046081 | 1.843729  | -0.018219 |
| 1 | 0.745819  | 2.307000  | -0.312083 |

-----  
---  
AcOH  
-----  
---

Number of imaginary frequencies : 0

Electronic energy : =-1218.074667  
Zero-point correction= 0.223415  
Thermal correction to Energy= 0.239432  
Thermal correction to Enthalpy= 0.240376  
Thermal correction to Gibbs Free Energy= 0.178912  
Sum of electronic and zero-point Energies= -1217.851252  
Sum of electronic and thermal Energies= -1217.835235  
Sum of electronic and thermal Enthalpies= -1217.834291  
Sum of electronic and thermal Free Energies= -1217.895755

.....  
Cartesian Coordinates  
.....

|    |           |           |           |
|----|-----------|-----------|-----------|
| 6  | 2.352473  | 1.400784  | 0.089725  |
| 6  | 2.392458  | 0.055776  | 0.460263  |
| 6  | 3.386937  | -0.775889 | -0.057281 |
| 6  | 4.334099  | -0.264588 | -0.935584 |
| 6  | 4.294975  | 1.078569  | -1.298512 |
| 6  | 3.304852  | 1.910499  | -0.784547 |
| 1  | 1.569481  | 2.041772  | 0.495194  |
| 1  | 3.411347  | -1.826965 | 0.225626  |
| 1  | 5.106512  | -0.916529 | -1.336362 |
| 1  | 5.039400  | 1.477673  | -1.983742 |
| 1  | 3.273452  | 2.960322  | -1.065773 |
| 6  | 1.364827  | -0.479333 | 1.405383  |
| 1  | 0.842247  | 0.312888  | 1.955197  |
| 1  | 1.776372  | -1.199250 | 2.124252  |
| 16 | 0.058387  | -1.421536 | 0.605229  |
| 8  | 0.611352  | -2.507433 | -0.175005 |
| 8  | -1.021748 | -1.645693 | 1.545411  |
| 8  | -0.451760 | -0.264870 | -0.482674 |
| 6  | -1.803593 | -0.023710 | -0.560688 |
| 6  | -2.611333 | -0.809776 | -1.365694 |
| 6  | -2.334794 | 1.058401  | 0.152412  |
| 6  | -3.964203 | -0.505286 | -1.470276 |
| 1  | -2.163307 | -1.646056 | -1.896457 |
| 6  | -3.694704 | 1.359020  | 0.034536  |
| 6  | -4.503708 | 0.576735  | -0.777504 |
| 1  | -4.603414 | -1.119493 | -2.099173 |
| 1  | -4.102721 | 2.200663  | 0.587334  |
| 1  | -5.561180 | 0.808412  | -0.867954 |
| 6  | -1.460784 | 1.807052  | 0.997427  |



7 -0.710021 2.380796 1.676910

-----  
---  
Different Possibilities of Potential Active Catalyst  
-----

---  
Pd(OAc)<sub>2</sub> with Ligand combinations (M06/6-31G\*\*)  
-----

---  
**(2a')**  
-----  
---

Number of imaginary frequencies : 0

Electronic energy : =-1252.710489  
Zero-point correction= 0.339273  
Thermal correction to Energy= 0.366055  
Thermal correction to Enthalpy= 0.366999  
Thermal correction to Gibbs Free Energy= 0.278684  
Sum of electronic and zero-point Energies= -1252.371216  
Sum of electronic and thermal Energies= -1252.344434  
Sum of electronic and thermal Enthalpies= -1252.343490  
Sum of electronic and thermal Free Energies= -1252.431805

.....  
Cartesian Coordinates  
.....

|    |           |           |           |
|----|-----------|-----------|-----------|
| 46 | -2.286097 | 0.397797  | -0.326306 |
| 1  | -2.041467 | -2.074674 | 1.033737  |
| 6  | -2.897834 | -2.487783 | -0.666445 |
| 8  | -2.685122 | -2.737434 | 0.580342  |
| 6  | -3.541707 | -3.597700 | -1.428049 |
| 1  | -3.719632 | -3.302654 | -2.461913 |
| 1  | -2.902235 | -4.484464 | -1.388584 |
| 1  | -4.486379 | -3.859721 | -0.941659 |
| 8  | -2.617177 | -1.424285 | -1.251039 |
| 6  | 1.426543  | -0.733055 | 1.428426  |
| 6  | -0.032890 | -0.722344 | 1.006685  |
| 8  | -0.323887 | 0.032753  | 0.013817  |
| 8  | -0.832732 | -1.413328 | 1.658096  |
| 7  | 2.240683  | 0.018364  | 0.501886  |
| 1  | 1.787005  | 0.625101  | -0.166261 |
| 6  | 3.575092  | -0.218415 | 0.407312  |
| 8  | 4.176389  | -1.007421 | 1.113770  |
| 6  | -3.689776 | 2.340799  | 0.057172  |
| 8  | -4.155468 | 1.296841  | -0.503134 |
| 6  | -4.521799 | 3.551428  | 0.267122  |
| 1  | -4.232709 | 4.046103  | 1.197573  |

|   |           |           |           |
|---|-----------|-----------|-----------|
| 1 | -4.347793 | 4.251981  | -0.556539 |
| 1 | -5.580434 | 3.283575  | 0.280526  |
| 8 | -2.464575 | 2.314433  | 0.413758  |
| 8 | 4.104504  | 0.545513  | -0.567312 |
| 6 | 5.531822  | 0.491563  | -0.849733 |
| 6 | 5.688812  | 1.494615  | -1.979393 |
| 1 | 5.370855  | 2.492103  | -1.656108 |
| 1 | 6.737689  | 1.547083  | -2.292756 |
| 1 | 5.081178  | 1.200860  | -2.842634 |
| 6 | 5.925220  | -0.900535 | -1.316649 |
| 1 | 5.807505  | -1.633833 | -0.515280 |
| 1 | 5.305985  | -1.201594 | -2.170082 |
| 1 | 6.972710  | -0.894602 | -1.641773 |
| 6 | 6.327986  | 0.933706  | 0.367393  |
| 1 | 7.388671  | 1.013269  | 0.100144  |
| 1 | 5.986492  | 1.919423  | 0.705167  |
| 1 | 6.223057  | 0.220792  | 1.188524  |
| 6 | 1.545092  | -0.216185 | 2.859895  |
| 1 | 2.591686  | -0.274706 | 3.171554  |
| 1 | 1.217577  | 0.828362  | 2.915479  |
| 1 | 0.931907  | -0.818424 | 3.535909  |
| 1 | 1.749195  | -1.784341 | 1.413027  |

-----  
 ---  
**(2b')**  
 -----  
 ---

Number of imaginary frequencies : 0

Electronic energy :        =-1023.7122798  
 Zero-point correction=            0.276900  
 Thermal correction to Energy=        0.297460  
 Thermal correction to Enthalpy=        0.298404  
 Thermal correction to Gibbs Free Energy=    0.227350  
 Sum of electronic and zero-point Energies=   -1023.435380  
 Sum of electronic and thermal Energies=   -1023.414820  
 Sum of electronic and thermal Enthalpies=   -1023.413876  
 Sum of electronic and thermal Free Energies=   -1023.484930

-----  
 Cartesian Coordinates  
 -----

|    |           |          |           |
|----|-----------|----------|-----------|
| 46 | 1.582809  | 0.217312 | -0.053443 |
| 6  | -0.771323 | 1.963698 | -0.041953 |
| 6  | 0.480365  | 2.811831 | -0.284504 |
| 8  | 1.628691  | 2.177734 | -0.323964 |
| 8  | 0.380242  | 4.014592 | -0.397580 |

S250

|   |           |           |           |
|---|-----------|-----------|-----------|
| 1 | -1.473783 | 2.164975  | -0.862159 |
| 7 | -0.396399 | 0.547199  | -0.053380 |
| 6 | -1.272772 | -0.398562 | -0.148172 |
| 8 | -0.959428 | -1.677502 | -0.124231 |
| 8 | 1.812141  | -1.851715 | 0.191194  |
| 6 | 3.092586  | -1.733072 | 0.121113  |
| 8 | 3.578753  | -0.581904 | -0.020932 |
| 6 | 3.958456  | -2.941596 | 0.194811  |
| 1 | 4.765445  | -2.771006 | 0.912527  |
| 1 | 4.421478  | -3.109118 | -0.783057 |
| 1 | 3.376111  | -3.820755 | 0.476959  |
| 1 | 0.006461  | -1.818153 | -0.003781 |
| 6 | -1.392857 | 2.373897  | 1.284548  |
| 1 | -2.331167 | 1.840261  | 1.470706  |
| 1 | -1.589629 | 3.449579  | 1.265008  |
| 1 | -0.696725 | 2.163794  | 2.105611  |
| 8 | -2.537791 | -0.091200 | -0.303891 |
| 6 | -3.670142 | -1.013446 | -0.077279 |
| 6 | -3.701362 | -2.075581 | -1.159997 |
| 1 | -4.639689 | -2.636675 | -1.079889 |
| 1 | -2.870381 | -2.779173 | -1.073994 |
| 1 | -3.670336 | -1.608018 | -2.150387 |
| 6 | -3.584157 | -1.586872 | 1.324590  |
| 1 | -2.746388 | -2.279546 | 1.437731  |
| 1 | -4.509080 | -2.131779 | 1.544749  |
| 1 | -3.484236 | -0.779755 | 2.060629  |
| 6 | -4.860156 | -0.080851 | -0.204338 |
| 1 | -5.788838 | -0.643126 | -0.059821 |
| 1 | -4.884358 | 0.382561  | -1.196135 |
| 1 | -4.812014 | 0.712481  | 0.549684  |

-----  
 ---  
 (3d')  
 -----  
 ---

Number of imaginary frequencies : 0

Electronic energy :        =-1813.2693842  
 Zero-point correction=            0.342261  
 Thermal correction to Energy=        0.373246  
 Thermal correction to Enthalpy=       0.374190  
 Thermal correction to Gibbs Free Energy=   0.276385  
 Sum of electronic and zero-point Energies=   -1812.927123  
 Sum of electronic and thermal Energies=   -1812.896139  
 Sum of electronic and thermal Enthalpies=   -1812.895194  
 Sum of electronic and thermal Free Energies=   -1812.992999

S251

.....  
 Cartesian Coordinates  
 .....

|    |           |           |           |
|----|-----------|-----------|-----------|
| 46 | 1.197495  | 1.231589  | -0.381653 |
| 6  | 1.790104  | 3.566056  | -0.059034 |
| 8  | 2.670053  | 2.637813  | -0.123026 |
| 6  | 2.187962  | 4.986423  | 0.095806  |
| 1  | 2.333585  | 5.425280  | -0.897190 |
| 1  | 3.130947  | 5.056491  | 0.642830  |
| 1  | 1.398286  | 5.543197  | 0.605181  |
| 8  | 0.573877  | 3.215494  | -0.160153 |
| 6  | -2.156987 | -1.620190 | -0.532325 |
| 6  | -0.767305 | -1.043548 | -0.501039 |
| 8  | -0.600847 | 0.189659  | -0.564035 |
| 8  | 0.173517  | -1.919734 | -0.429860 |
| 1  | -2.251413 | -2.256493 | 0.361720  |
| 7  | -3.128761 | -0.559039 | -0.468023 |
| 1  | -2.828848 | 0.399917  | -0.575194 |
| 6  | -4.401875 | -0.832201 | -0.064299 |
| 8  | -4.797586 | -1.955571 | 0.186197  |
| 8  | 2.229016  | -0.486147 | -0.607863 |
| 1  | 1.094531  | -1.466233 | -0.476017 |
| 6  | 3.352515  | -0.574627 | 0.186725  |
| 6  | 3.001777  | -1.106378 | 1.576252  |
| 6  | 4.364952  | -1.453993 | -0.547472 |
| 1  | 3.842135  | 0.404245  | 0.334794  |
| 9  | 1.969711  | -0.409980 | 2.072481  |
| 9  | 4.016776  | -0.988396 | 2.427761  |
| 9  | 2.631481  | -2.386910 | 1.532808  |
| 9  | 4.788284  | -0.819946 | -1.638167 |
| 9  | 3.829272  | -2.612118 | -0.925349 |
| 9  | 5.425121  | -1.715327 | 0.219286  |
| 6  | -2.333088 | -2.506768 | -1.765818 |
| 1  | -2.222813 | -1.914995 | -2.681212 |
| 1  | -3.340125 | -2.930698 | -1.737163 |
| 1  | -1.601933 | -3.319726 | -1.771620 |
| 8  | -5.111985 | 0.304124  | -0.000785 |
| 6  | -6.513259 | 0.274934  | 0.407683  |
| 6  | -6.908270 | 1.739878  | 0.354266  |
| 1  | -6.288321 | 2.331834  | 1.036705  |
| 1  | -7.957804 | 1.855712  | 0.647300  |
| 1  | -6.783591 | 2.137470  | -0.659053 |
| 6  | -7.330266 | -0.534507 | -0.585355 |
| 1  | -7.048784 | -1.589993 | -0.565172 |
| 1  | -7.186087 | -0.144679 | -1.599938 |
| 1  | -8.394722 | -0.448269 | -0.336403 |
| 6  | -6.635131 | -0.257261 | 1.826024  |
| 1  | -5.994261 | 0.320679  | 2.502416  |
| 1  | -6.353228 | -1.311324 | 1.882060  |

1 -7.671923 -0.150182 2.166503

-----  
---  
(2')  
-----  
---

Number of imaginary frequencies : 0

Electronic energy : =-1813.2842259  
Zero-point correction= 0.340864  
Thermal correction to Energy= 0.370969  
Thermal correction to Enthalpy= 0.371913  
Thermal correction to Gibbs Free Energy= 0.278354  
Sum of electronic and zero-point Energies= -1812.943361  
Sum of electronic and thermal Energies= -1812.913257  
Sum of electronic and thermal Enthalpies= -1812.912312  
Sum of electronic and thermal Free Energies= -1813.005872

.....  
Cartesian Coordinates  
.....

|    |           |           |           |
|----|-----------|-----------|-----------|
| 46 | -0.748180 | 1.034084  | -0.225341 |
| 6  | 1.777318  | 2.472531  | 0.052916  |
| 6  | 0.642237  | 3.460823  | 0.317051  |
| 8  | -0.585317 | 2.966597  | 0.233910  |
| 8  | 0.858106  | 4.622202  | 0.568118  |
| 1  | 2.388834  | 2.453931  | 0.967462  |
| 7  | 1.245192  | 1.136112  | -0.211738 |
| 6  | 2.016100  | 0.065102  | -0.207497 |
| 8  | 1.600463  | -1.106847 | -0.480707 |
| 8  | -0.756026 | -0.972088 | -0.749593 |
| 1  | 0.442866  | -1.143743 | -0.657000 |
| 6  | -1.540042 | -1.844793 | -0.013554 |
| 6  | -1.775563 | -3.086013 | -0.873724 |
| 6  | -0.908235 | -2.182721 | 1.338679  |
| 1  | -2.527122 | -1.405277 | 0.195795  |
| 9  | -0.628228 | -3.583553 | -1.328376 |
| 9  | -2.531086 | -2.764520 | -1.920970 |
| 9  | -2.404008 | -4.043527 | -0.188865 |
| 9  | 0.162132  | -2.966938 | 1.207405  |
| 9  | -1.779641 | -2.790938 | 2.140697  |
| 9  | -0.512017 | -1.060412 | 1.948216  |
| 8  | -2.863666 | 1.051451  | -0.152400 |
| 6  | -3.582271 | 2.042434  | 0.053375  |
| 8  | -3.155558 | 3.245635  | 0.287673  |
| 6  | -5.068124 | 1.916105  | 0.048937  |
| 1  | -5.488347 | 2.615010  | -0.680302 |

|   |           |           |           |
|---|-----------|-----------|-----------|
| 1 | -5.457852 | 2.203770  | 1.030280  |
| 1 | -5.366024 | 0.895498  | -0.190287 |
| 1 | -2.152534 | 3.314193  | 0.303103  |
| 6 | 2.619927  | 2.995498  | -1.103977 |
| 1 | 3.497338  | 2.360266  | -1.260766 |
| 1 | 2.945769  | 4.015881  | -0.881958 |
| 1 | 2.025709  | 3.009879  | -2.025251 |
| 8 | 3.286870  | 0.268236  | 0.099798  |
| 6 | 4.304233  | -0.793619 | 0.063316  |
| 6 | 3.989205  | -1.849799 | 1.107714  |
| 1 | 3.068656  | -2.391774 | 0.877884  |
| 1 | 3.890754  | -1.386677 | 2.096337  |
| 1 | 4.817015  | -2.567422 | 1.150927  |
| 6 | 4.416597  | -1.359149 | -1.340953 |
| 1 | 4.559962  | -0.547653 | -2.064888 |
| 1 | 3.532631  | -1.935546 | -1.622274 |
| 1 | 5.292460  | -2.016330 | -1.392510 |
| 6 | 5.564746  | -0.032617 | 0.432648  |
| 1 | 5.767131  | 0.756703  | -0.300570 |
| 1 | 6.420704  | -0.715821 | 0.454456  |
| 1 | 5.461873  | 0.429255  | 1.420478  |

-----  
 ---  
 (2c')  
 -----  
 ---

Number of imaginary frequencies : 0

Electronic energy : =-2373.8245906  
 Zero-point correction= 0.345884  
 Thermal correction to Energy= 0.380452  
 Thermal correction to Enthalpy= 0.381396  
 Thermal correction to Gibbs Free Energy= 0.279021  
 Sum of electronic and zero-point Energies= -2373.478706  
 Sum of electronic and thermal Energies= -2373.444139  
 Sum of electronic and thermal Enthalpies= -2373.443195  
 Sum of electronic and thermal Free Energies= -2373.545570

.....  
 Cartesian Coordinates  
 .....

|    |           |           |           |
|----|-----------|-----------|-----------|
| 46 | -0.022862 | -0.940211 | -0.224820 |
| 6  | 2.374229  | -2.578629 | -0.382614 |
| 6  | 1.204587  | -3.346180 | -1.006502 |
| 8  | 0.026550  | -2.755891 | -0.993418 |
| 8  | 1.376637  | -4.452762 | -1.466680 |
| 1  | 3.117728  | -2.425512 | -1.179033 |

|   |           |           |           |
|---|-----------|-----------|-----------|
| 7 | 1.918954  | -1.272844 | 0.113790  |
| 6 | 2.760801  | -0.341343 | 0.474521  |
| 8 | 2.393630  | 0.802607  | 0.959517  |
| 8 | -0.085173 | 0.963772  | 0.584133  |
| 1 | 1.373757  | 0.939600  | 0.904789  |
| 6 | -0.494671 | 1.971370  | -0.261742 |
| 6 | -1.181957 | 3.041202  | 0.588767  |
| 6 | 0.661555  | 2.550297  | -1.083766 |
| 1 | -1.250137 | 1.642108  | -1.000244 |
| 9 | -0.421414 | 3.443701  | 1.598799  |
| 9 | -2.307856 | 2.529614  | 1.111340  |
| 9 | -1.522317 | 4.106380  | -0.134955 |
| 9 | 1.509724  | 3.252083  | -0.326640 |
| 9 | 0.223959  | 3.340031  | -2.060309 |
| 9 | 1.359725  | 1.556245  | -1.645986 |
| 8 | -2.118970 | -0.857519 | -0.761916 |
| 1 | -2.358785 | -1.716568 | -1.151912 |
| 6 | -3.041081 | -0.481788 | 0.240344  |
| 6 | -4.190671 | 0.280950  | -0.409568 |
| 6 | -3.468917 | -1.723206 | 1.015539  |
| 1 | -2.528405 | 0.206539  | 0.920958  |
| 9 | -4.950991 | -0.532337 | -1.141542 |
| 9 | -4.942330 | 0.866240  | 0.511948  |
| 9 | -3.698297 | 1.222262  | -1.212007 |
| 9 | -4.514295 | -1.483564 | 1.790771  |
| 9 | -3.785345 | -2.698569 | 0.154393  |
| 9 | -2.462099 | -2.154771 | 1.765709  |
| 6 | 2.982557  | -3.433176 | 0.719897  |
| 1 | 3.891560  | -2.978108 | 1.122792  |
| 1 | 3.222415  | -4.416574 | 0.305631  |
| 1 | 2.259907  | -3.566683 | 1.533425  |
| 8 | 4.046569  | -0.588675 | 0.361445  |
| 6 | 5.096024  | 0.449693  | 0.460975  |
| 6 | 5.179887  | 0.980912  | 1.879471  |
| 1 | 4.305046  | 1.575614  | 2.149570  |
| 1 | 6.070528  | 1.614157  | 1.966388  |
| 1 | 5.283244  | 0.153874  | 2.590873  |
| 6 | 4.836146  | 1.533263  | -0.569737 |
| 1 | 3.936677  | 2.113028  | -0.348028 |
| 1 | 4.737210  | 1.092189  | -1.568571 |
| 1 | 5.691499  | 2.218374  | -0.585955 |
| 6 | 6.344091  | -0.338441 | 0.109424  |
| 1 | 6.502842  | -1.151573 | 0.826331  |
| 1 | 7.217955  | 0.321400  | 0.133441  |
| 1 | 6.260339  | -0.769904 | -0.893655 |

---

(2e')

-----  
---  
Number of imaginary frequencies : 0

Electronic energy :       =-1252.7193173  
Zero-point correction=               0.339633  
Thermal correction to Energy=       0.366004  
Thermal correction to Enthalpy=     0.366948  
Thermal correction to Gibbs Free Energy=   0.281314  
Sum of electronic and zero-point Energies=   -1252.379684  
Sum of electronic and thermal Energies=   -1252.353314  
Sum of electronic and thermal Enthalpies=   -1252.352369  
Sum of electronic and thermal Free Energies=   -1252.438003

.....  
          Cartesian Coordinates  
.....

|    |           |           |           |
|----|-----------|-----------|-----------|
| 46 | -1.094273 | 0.018451  | 0.095838  |
| 6  | 0.895877  | -1.998241 | 0.559241  |
| 6  | -0.353934 | -2.694563 | 0.033945  |
| 8  | -1.268896 | -1.882310 | -0.490283 |
| 8  | -0.503562 | -3.891953 | 0.083084  |
| 1  | 1.734618  | -2.402510 | -0.023095 |
| 7  | 0.796334  | -0.557950 | 0.338338  |
| 6  | 1.834328  | 0.161790  | -0.095481 |
| 8  | 1.774053  | 1.325463  | -0.527926 |
| 8  | -1.115656 | 1.945892  | 0.941489  |
| 8  | -3.165453 | 0.407914  | -0.221380 |
| 6  | -4.034609 | -0.418870 | -0.530895 |
| 8  | -3.831628 | -1.684350 | -0.746611 |
| 6  | -5.458875 | -0.002103 | -0.689994 |
| 1  | -6.089951 | -0.607643 | -0.032727 |
| 1  | -5.780341 | -0.202277 | -1.716778 |
| 1  | -5.575800 | 1.056596  | -0.459184 |
| 1  | -2.861221 | -1.938080 | -0.656630 |
| 6  | -0.793131 | 3.025653  | 0.422096  |
| 8  | 0.079409  | 3.164074  | -0.520362 |
| 6  | -1.423342 | 4.298179  | 0.884533  |
| 1  | -1.886136 | 4.798772  | 0.028369  |
| 1  | -0.650180 | 4.969811  | 1.269410  |
| 1  | -2.170681 | 4.099457  | 1.652519  |
| 1  | 0.664665  | 2.323840  | -0.607667 |
| 6  | 1.103200  | -2.342034 | 2.026241  |
| 1  | 2.052011  | -1.925800 | 2.378839  |
| 1  | 1.111391  | -3.428601 | 2.157321  |
| 1  | 0.292975  | -1.919045 | 2.633114  |
| 8  | 3.000580  | -0.498152 | -0.000652 |
| 6  | 4.269555  | 0.090461  | -0.417731 |



|   |          |           |           |
|---|----------|-----------|-----------|
| 6 | 4.244688 | 0.422677  | -1.900046 |
| 1 | 5.252332 | 0.712305  | -2.221724 |
| 1 | 3.557184 | 1.241979  | -2.118651 |
| 1 | 3.944107 | -0.458194 | -2.479535 |
| 6 | 4.600009 | 1.296047  | 0.444819  |
| 1 | 4.565492 | 1.022726  | 1.505983  |
| 1 | 3.904703 | 2.118457  | 0.266777  |
| 1 | 5.616097 | 1.638666  | 0.214890  |
| 6 | 5.253351 | -1.035859 | -0.147714 |
| 1 | 6.268391 | -0.720284 | -0.413932 |
| 1 | 4.997844 | -1.921863 | -0.739462 |
| 1 | 5.241234 | -1.312851 | 0.912294  |

-----  
 ---  
 (2f')  
 -----  
 ---

Number of imaginary frequencies : 0

Electronic energy : =-3163.3631122  
 Zero-point correction= 0.412870  
 Thermal correction to Energy= 0.457678  
 Thermal correction to Enthalpy= 0.458622  
 Thermal correction to Gibbs Free Energy= 0.331432  
 Sum of electronic and zero-point Energies= -3162.950242  
 Sum of electronic and thermal Energies= -3162.905434  
 Sum of electronic and thermal Enthalpies= -3162.904490  
 Sum of electronic and thermal Free Energies= -3163.031680

-----  
 Cartesian Coordinates  
 -----

|    |           |           |           |
|----|-----------|-----------|-----------|
| 46 | -0.734096 | 0.060810  | -0.290870 |
| 8  | -2.432427 | -1.259814 | -0.373492 |
| 6  | 2.942497  | 2.335508  | -0.932360 |
| 6  | 1.477332  | 1.995940  | -0.852095 |
| 8  | 1.140078  | 0.906777  | -0.345873 |
| 8  | 0.661764  | 2.868290  | -1.329856 |
| 1  | 3.098063  | 3.186427  | -0.245366 |
| 7  | 3.703818  | 1.190448  | -0.495700 |
| 1  | 3.207808  | 0.394942  | -0.111919 |
| 6  | 5.008146  | 1.342318  | -0.111576 |
| 8  | 5.644749  | 2.368322  | -0.254783 |
| 8  | -1.609438 | 1.831007  | -0.795634 |
| 1  | -0.307108 | 2.570325  | -1.177497 |
| 6  | -2.461315 | 2.367530  | 0.143382  |
| 6  | -3.713382 | 2.852574  | -0.583547 |

S257

|   |           |           |           |
|---|-----------|-----------|-----------|
| 6 | -1.775172 | 3.464436  | 0.954338  |
| 1 | -2.811001 | 1.630521  | 0.889085  |
| 9 | -4.360511 | 1.781271  | -1.073653 |
| 9 | -4.551945 | 3.486700  | 0.234961  |
| 9 | -3.423608 | 3.653959  | -1.596751 |
| 9 | -0.619472 | 2.988932  | 1.435476  |
| 9 | -1.496445 | 4.526859  | 0.200662  |
| 9 | -2.513872 | 3.857741  | 1.987491  |
| 8 | 0.038949  | -1.694676 | 0.219495  |
| 6 | 1.104386  | -2.142836 | -0.523484 |
| 6 | 0.642328  | -3.300631 | -1.403197 |
| 6 | 2.254623  | -2.503918 | 0.414890  |
| 1 | 1.524612  | -1.385450 | -1.211463 |
| 9 | 3.300368  | -2.992197 | -0.253313 |
| 9 | 2.664574  | -1.393798 | 1.048624  |
| 9 | 1.891603  | -3.389217 | 1.332114  |
| 9 | 1.599728  | -3.742282 | -2.214265 |
| 9 | 0.200009  | -4.322591 | -0.673857 |
| 9 | -0.375561 | -2.875032 | -2.164898 |
| 1 | -1.916692 | -2.052029 | -0.097520 |
| 6 | -3.668126 | -1.174876 | 0.291327  |
| 6 | -3.445055 | -1.312303 | 1.796263  |
| 6 | -4.598600 | -2.234251 | -0.301176 |
| 1 | -4.100642 | -0.190320 | 0.075530  |
| 9 | -2.778028 | -0.240886 | 2.242901  |
| 9 | -2.702784 | -2.385780 | 2.053980  |
| 9 | -4.584342 | -1.398694 | 2.463209  |
| 9 | -5.821273 | -2.133679 | 0.202988  |
| 9 | -4.667316 | -2.074278 | -1.614855 |
| 9 | -4.126156 | -3.454921 | -0.046936 |
| 6 | 3.321103  | 2.787584  | -2.340320 |
| 1 | 4.385252  | 3.034649  | -2.342078 |
| 1 | 3.143364  | 1.982251  | -3.061189 |
| 1 | 2.745352  | 3.668517  | -2.636114 |
| 8 | 5.435128  | 0.188347  | 0.417233  |
| 6 | 6.798561  | 0.039925  | 0.912734  |
| 6 | 6.814178  | -1.401291 | 1.390660  |
| 1 | 6.613739  | -2.084377 | 0.557893  |
| 1 | 7.792490  | -1.647521 | 1.818356  |
| 1 | 6.045243  | -1.559091 | 2.155217  |
| 6 | 7.039780  | 0.993862  | 2.070063  |
| 1 | 7.017163  | 2.035086  | 1.739193  |
| 1 | 6.279404  | 0.848438  | 2.846474  |
| 1 | 8.021565  | 0.788384  | 2.513175  |
| 6 | 7.793787  | 0.241887  | -0.216908 |
| 1 | 7.797657  | 1.277486  | -0.564402 |
| 1 | 8.799792  | -0.015403 | 0.135524  |
| 1 | 7.550078  | -0.416970 | -1.058568 |

-----  
---  
Different Possibilities of Pd(OAc)<sub>2</sub> -Ligand with Substrate at the M06/6-31G\*\* Level of Theory  
-----  
---

(3a')

-----  
---

Number of imaginary frequencies : 0

Electronic energy :       =-2241.8174069  
Zero-point correction=                0.503322  
Thermal correction to Energy=        0.541001  
Thermal correction to Enthalpy=       0.541945  
Thermal correction to Gibbs Free Energy=   0.431587  
Sum of electronic and zero-point Energies=   -2241.314085  
Sum of electronic and thermal Energies=   -2241.276406  
Sum of electronic and thermal Enthalpies=   -2241.275462  
Sum of electronic and thermal Free Energies=   -2241.385820

-----  
                  Cartesian Coordinates  
-----

|    |           |           |           |
|----|-----------|-----------|-----------|
| 46 | 3.570745  | -0.446359 | 0.137400  |
| 6  | -2.036196 | 0.039670  | 1.639908  |
| 1  | -1.582294 | -0.761382 | 1.046507  |
| 1  | -2.157942 | -0.316290 | 2.670191  |
| 8  | 0.456752  | 0.708832  | 2.280623  |
| 6  | -0.310314 | 2.844717  | -0.270564 |
| 6  | 1.020211  | 3.214657  | -0.519551 |
| 6  | -1.346417 | 3.732150  | -0.509842 |
| 6  | 1.308440  | 4.486751  | -1.024752 |
| 6  | -1.048101 | 4.996395  | -1.006426 |
| 1  | -2.365694 | 3.417986  | -0.297324 |
| 6  | 0.269475  | 5.372842  | -1.264821 |
| 1  | 2.340113  | 4.761256  | -1.225043 |
| 1  | -1.855721 | 5.698721  | -1.195307 |
| 1  | 0.485315  | 6.362423  | -1.657024 |
| 6  | 2.024816  | 2.245627  | -0.255057 |
| 7  | 2.785270  | 1.407589  | -0.017567 |
| 6  | 5.602717  | -1.580622 | 0.848454  |
| 8  | 5.515643  | -0.313164 | 0.909685  |
| 6  | 6.843460  | -2.297077 | 1.240444  |
| 1  | 7.407026  | -2.555999 | 0.337855  |
| 1  | 7.463950  | -1.660580 | 1.874657  |
| 1  | 6.588854  | -3.227414 | 1.754493  |
| 8  | 4.587925  | -2.221211 | 0.415698  |
| 6  | 0.081986  | -1.224864 | -2.173644 |

|    |           |           |           |
|----|-----------|-----------|-----------|
| 6  | 1.475653  | -0.757857 | -1.733868 |
| 8  | 1.773057  | -1.090406 | -0.510355 |
| 8  | 2.182413  | -0.139358 | -2.511340 |
| 1  | 0.241921  | -2.059823 | -2.875950 |
| 7  | -0.673059 | -1.691373 | -1.020911 |
| 1  | -0.116973 | -1.863887 | -0.190643 |
| 6  | -1.838159 | -2.383354 | -1.169574 |
| 8  | -2.426275 | -2.538887 | -2.221914 |
| 8  | -0.558853 | 1.560602  | 0.148039  |
| 16 | -0.768190 | 1.297945  | 1.786317  |
| 8  | -1.298333 | 2.520215  | 2.357076  |
| 6  | -3.311336 | 0.551496  | 1.052342  |
| 6  | -4.353530 | 0.954491  | 1.887841  |
| 6  | -3.475263 | 0.624925  | -0.334355 |
| 6  | -5.553129 | 1.405051  | 1.348557  |
| 1  | -4.219712 | 0.911461  | 2.967951  |
| 6  | -4.673877 | 1.079879  | -0.871991 |
| 1  | -2.662022 | 0.320205  | -0.991464 |
| 6  | -5.715277 | 1.465519  | -0.032361 |
| 1  | -6.362637 | 1.708928  | 2.007684  |
| 1  | -4.797245 | 1.119732  | -1.951539 |
| 1  | -6.655419 | 1.812721  | -0.454618 |
| 6  | -0.623004 | -0.099469 | -2.913213 |
| 1  | -0.784679 | 0.749696  | -2.236553 |
| 1  | 0.000557  | 0.235308  | -3.745663 |
| 1  | -1.588325 | -0.445901 | -3.292357 |
| 8  | -2.252330 | -2.815400 | 0.043452  |
| 6  | -3.480208 | -3.590577 | 0.182266  |
| 6  | -4.687051 | -2.773015 | -0.247931 |
| 1  | -5.599776 | -3.344879 | -0.040439 |
| 1  | -4.737671 | -1.833445 | 0.317778  |
| 1  | -4.651452 | -2.541920 | -1.315080 |
| 6  | -3.534249 | -3.857995 | 1.676220  |
| 1  | -3.586422 | -2.912742 | 2.230400  |
| 1  | -4.422258 | -4.451029 | 1.922292  |
| 1  | -2.644594 | -4.406333 | 2.005116  |
| 6  | -3.360963 | -4.893067 | -0.591237 |
| 1  | -2.456504 | -5.432796 | -0.286524 |
| 1  | -4.227394 | -5.528722 | -0.372655 |
| 1  | -3.319815 | -4.710856 | -1.667655 |

-----  
---  
**(3b')**  
-----  
---

Number of imaginary frequencies : 0

|                                              |                |
|----------------------------------------------|----------------|
| Electronic energy :                          | =-2241.8158745 |
| Zero-point correction=                       | 0.503825       |
| Thermal correction to Energy=                | 0.541497       |
| Thermal correction to Enthalpy=              | 0.542441       |
| Thermal correction to Gibbs Free Energy=     | 0.433274       |
| Sum of electronic and zero-point Energies=   | -2241.312049   |
| Sum of electronic and thermal Energies=      | -2241.274378   |
| Sum of electronic and thermal Enthalpies=    | -2241.273434   |
| Sum of electronic and thermal Free Energies= | -2241.382600   |

.....  
 Cartesian Coordinates  
 .....

|    |           |           |           |
|----|-----------|-----------|-----------|
| 46 | -0.473750 | -1.995605 | 0.474321  |
| 6  | 2.988295  | -0.167332 | -1.303254 |
| 1  | 2.031203  | -0.613174 | -1.007463 |
| 1  | 3.161489  | -0.398276 | -2.362178 |
| 8  | 1.398885  | 1.889931  | -1.889316 |
| 6  | 1.746923  | 2.835270  | 0.732326  |
| 6  | 0.449886  | 2.460789  | 1.112530  |
| 6  | 2.148019  | 4.157091  | 0.804889  |
| 6  | -0.459713 | 3.418496  | 1.571613  |
| 6  | 1.242268  | 5.106922  | 1.270847  |
| 1  | 3.156975  | 4.417852  | 0.497078  |
| 6  | -0.048399 | 4.742724  | 1.649318  |
| 1  | -1.472918 | 3.109892  | 1.820824  |
| 1  | 1.548559  | 6.148160  | 1.331238  |
| 1  | -0.744788 | 5.498215  | 2.001477  |
| 6  | 0.114362  | 1.087395  | 0.977185  |
| 7  | -0.067124 | -0.046507 | 0.830167  |
| 6  | 0.656355  | -3.941458 | -0.472818 |
| 8  | 1.251340  | -2.812716 | -0.413341 |
| 6  | 1.305017  | -5.119523 | -1.103894 |
| 1  | 1.055731  | -5.131996 | -2.170382 |
| 1  | 2.390669  | -5.051551 | -1.003706 |
| 1  | 0.928069  | -6.041450 | -0.655265 |
| 8  | -0.519303 | -4.015083 | 0.003499  |
| 6  | -4.535659 | -1.218157 | 1.193580  |
| 6  | -3.251805 | -1.718646 | 0.501496  |
| 8  | -2.244805 | -1.631360 | 1.331348  |
| 8  | -3.208510 | -2.092249 | -0.656141 |
| 1  | -4.607323 | -1.759611 | 2.145467  |
| 7  | -4.358316 | 0.190030  | 1.579935  |
| 1  | -4.004616 | 0.338024  | 2.515174  |
| 6  | -3.850017 | 1.135719  | 0.724547  |
| 8  | -3.255113 | 2.132459  | 1.102930  |
| 8  | 2.612240  | 1.851492  | 0.317135  |
| 16 | 2.708548  | 1.606467  | -1.333818 |
| 8  | 3.883726  | 2.312259  | -1.800421 |

|   |           |           |           |
|---|-----------|-----------|-----------|
| 6 | 4.122545  | -0.587359 | -0.424993 |
| 6 | 5.444126  | -0.429396 | -0.843687 |
| 6 | 3.855593  | -1.135130 | 0.830619  |
| 6 | 6.489101  | -0.820572 | -0.015283 |
| 1 | 5.650247  | 0.009292  | -1.818853 |
| 6 | 4.901884  | -1.527970 | 1.656085  |
| 1 | 2.820626  | -1.258695 | 1.148051  |
| 6 | 6.218846  | -1.371013 | 1.234234  |
| 1 | 7.517176  | -0.696830 | -0.346894 |
| 1 | 4.688739  | -1.958640 | 2.631554  |
| 1 | 7.037490  | -1.679579 | 1.880318  |
| 6 | -5.780360 | -1.485246 | 0.374688  |
| 1 | -5.919564 | -2.564685 | 0.257358  |
| 1 | -6.656476 | -1.067253 | 0.880863  |
| 1 | -5.696039 | -1.049642 | -0.622335 |
| 8 | -4.131605 | 0.816446  | -0.536613 |
| 6 | -3.545936 | 1.501760  | -1.682369 |
| 6 | -4.064873 | 0.673112  | -2.845157 |
| 1 | -5.160578 | 0.699380  | -2.875120 |
| 1 | -3.680934 | 1.068188  | -3.792667 |
| 1 | -3.745872 | -0.369439 | -2.731047 |
| 6 | -4.057340 | 2.929352  | -1.749427 |
| 1 | -3.705297 | 3.515972  | -0.896859 |
| 1 | -3.701322 | 3.398939  | -2.674435 |
| 1 | -5.153387 | 2.940340  | -1.759853 |
| 6 | -2.031169 | 1.430515  | -1.620051 |
| 1 | -1.630022 | 2.073344  | -0.830596 |
| 1 | -1.709550 | 0.394092  | -1.447235 |
| 1 | -1.607052 | 1.765345  | -2.573682 |

-----  
 ---  
 (3c')  
 -----  
 ---

Number of imaginary frequencies : 0

Electronic energy :        =-2241.8127712  
 Zero-point correction=        0.502806  
 Thermal correction to Energy=        0.540609  
 Thermal correction to Enthalpy=        0.541553  
 Thermal correction to Gibbs Free Energy=        0.431079  
 Sum of electronic and zero-point Energies=        -2241.309966  
 Sum of electronic and thermal Energies=        -2241.272162  
 Sum of electronic and thermal Enthalpies=        -2241.271218  
 Sum of electronic and thermal Free Energies=        -2241.381692

## Cartesian Coordinates

|    |           |           |           |
|----|-----------|-----------|-----------|
| 46 | 3.405608  | 0.407107  | -0.542182 |
| 6  | -2.898145 | -1.356738 | 0.015406  |
| 1  | -3.110007 | -1.957661 | 0.908363  |
| 1  | -3.247880 | -0.325743 | 0.165874  |
| 8  | -0.727922 | -0.555419 | 1.305658  |
| 6  | -0.134407 | -3.261075 | 1.220813  |
| 6  | 1.112278  | -2.869443 | 1.738895  |
| 6  | -0.871767 | -4.245522 | 1.861687  |
| 6  | 1.598852  | -3.466353 | 2.906949  |
| 6  | -0.374969 | -4.839558 | 3.016343  |
| 1  | -1.825746 | -4.539968 | 1.431419  |
| 6  | 0.854723  | -4.449554 | 3.541858  |
| 1  | 2.559795  | -3.148541 | 3.301985  |
| 1  | -0.955247 | -5.613240 | 3.512321  |
| 1  | 1.234907  | -4.913313 | 4.447289  |
| 6  | 1.871032  | -1.870191 | 1.066139  |
| 7  | 2.495761  | -1.075412 | 0.502995  |
| 6  | 5.535848  | 0.828956  | -1.642205 |
| 8  | 5.331035  | -0.275319 | -1.044823 |
| 6  | 6.841077  | 1.136883  | -2.282156 |
| 1  | 7.443312  | 1.738368  | -1.593020 |
| 1  | 7.379854  | 0.213510  | -2.505545 |
| 1  | 6.681685  | 1.723996  | -3.189974 |
| 8  | 4.585775  | 1.679389  | -1.655938 |
| 6  | 0.236318  | 2.854503  | 0.843920  |
| 6  | 1.574651  | 2.100877  | 0.713800  |
| 8  | 1.686297  | 1.441533  | -0.402348 |
| 8  | 2.413629  | 2.169563  | 1.596123  |
| 1  | 0.451696  | 3.896282  | 0.554290  |
| 7  | -0.729314 | 2.272456  | -0.079663 |
| 1  | -0.398071 | 1.502543  | -0.651159 |
| 6  | -2.065173 | 2.452044  | -0.103261 |
| 8  | -2.841124 | 1.675810  | -0.656538 |
| 8  | -0.603363 | -2.736466 | 0.048603  |
| 16 | -1.115004 | -1.130992 | 0.031091  |
| 8  | -0.625349 | -0.620628 | -1.226843 |
| 6  | -3.409042 | -1.949173 | -1.255265 |
| 6  | -3.610252 | -1.123289 | -2.363543 |
| 6  | -3.679695 | -3.313967 | -1.348913 |
| 6  | -4.088572 | -1.665548 | -3.549871 |
| 1  | -3.385597 | -0.061111 | -2.275257 |
| 6  | -4.160630 | -3.852763 | -2.536414 |
| 1  | -3.520784 | -3.955181 | -0.481910 |
| 6  | -4.365182 | -3.027299 | -3.637591 |
| 1  | -4.247546 | -1.021154 | -4.410998 |
| 1  | -4.376671 | -4.916408 | -2.602325 |
| 1  | -4.742737 | -3.446448 | -4.567509 |

|   |           |          |           |
|---|-----------|----------|-----------|
| 6 | -0.210868 | 2.821605 | 2.298958  |
| 1 | 0.632150  | 3.103318 | 2.933836  |
| 1 | -1.043124 | 3.508123 | 2.473144  |
| 1 | -0.523381 | 1.805140 | 2.565681  |
| 8 | -2.432008 | 3.583078 | 0.521486  |
| 6 | -3.829644 | 3.855234 | 0.815200  |
| 6 | -4.419369 | 2.732615 | 1.655627  |
| 1 | -4.562193 | 1.821804 | 1.068816  |
| 1 | -3.757281 | 2.510814 | 2.502521  |
| 1 | -5.391198 | 3.046531 | 2.055103  |
| 6 | -3.758685 | 5.135578 | 1.630076  |
| 1 | -3.258137 | 5.925610 | 1.059791  |
| 1 | -4.768556 | 5.475897 | 1.886068  |
| 1 | -3.199772 | 4.973621 | 2.559325  |
| 6 | -4.605521 | 4.086829 | -0.471070 |
| 1 | -4.141879 | 4.894670 | -1.049116 |
| 1 | -4.630093 | 3.182992 | -1.084303 |
| 1 | -5.633443 | 4.384940 | -0.230456 |

-----  
---  
**(3d')**  
-----  
---

Number of imaginary frequencies : 0

Electronic energy : =-2241.8110682  
Zero-point correction= 0.504159  
Thermal correction to Energy= 0.541427  
Thermal correction to Enthalpy= 0.542371  
Thermal correction to Gibbs Free Energy= 0.435610  
Sum of electronic and zero-point Energies= -2241.306910  
Sum of electronic and thermal Energies= -2241.269641  
Sum of electronic and thermal Enthalpies= -2241.268697  
Sum of electronic and thermal Free Energies= -2241.375458

.....  
Cartesian Coordinates  
.....

|    |           |           |           |
|----|-----------|-----------|-----------|
| 46 | 1.294963  | 1.873648  | 0.386193  |
| 6  | -1.550971 | -1.407512 | -1.780019 |
| 1  | -0.468245 | -1.261549 | -1.667399 |
| 1  | -1.726854 | -2.090661 | -2.622734 |
| 8  | -1.027650 | -3.317852 | 0.003595  |
| 6  | -3.213405 | -0.552330 | 1.188985  |
| 6  | -2.978911 | 0.810396  | 1.445335  |
| 6  | -4.490065 | -1.074965 | 1.357216  |



|    |           |           |           |
|----|-----------|-----------|-----------|
| 6  | -4.033000 | 1.652744  | 1.815577  |
| 6  | -5.527550 | -0.223680 | 1.720718  |
| 1  | -4.662325 | -2.131206 | 1.189538  |
| 6  | -5.310845 | 1.134957  | 1.943281  |
| 1  | -3.829345 | 2.704567  | 1.997203  |
| 1  | -6.525698 | -0.637295 | 1.841499  |
| 1  | -6.134836 | 1.782651  | 2.227564  |
| 6  | -1.659394 | 1.312627  | 1.304978  |
| 7  | -0.571247 | 1.691212  | 1.185507  |
| 6  | 2.812457  | 3.551124  | -0.549290 |
| 8  | 1.686895  | 3.916363  | -0.084169 |
| 6  | 3.754298  | 4.527757  | -1.162400 |
| 1  | 3.670689  | 4.467796  | -2.252676 |
| 1  | 3.509846  | 5.543271  | -0.843636 |
| 1  | 4.782466  | 4.272871  | -0.893179 |
| 8  | 3.115138  | 2.314741  | -0.498803 |
| 8  | -2.111859 | -1.305077 | 0.871248  |
| 16 | -2.079518 | -2.409294 | -0.383873 |
| 8  | -3.433421 | -2.878789 | -0.616156 |
| 6  | -2.273861 | -0.101923 | -1.912615 |
| 6  | -3.663349 | -0.036804 | -2.055448 |
| 6  | -1.524059 | 1.074737  | -1.884701 |
| 6  | -4.294502 | 1.198293  | -2.139608 |
| 1  | -4.246940 | -0.955882 | -2.078140 |
| 6  | -2.160303 | 2.309729  | -1.974863 |
| 1  | -0.438281 | 1.005755  | -1.795597 |
| 6  | -3.545124 | 2.372468  | -2.095058 |
| 1  | -5.376414 | 1.245475  | -2.240761 |
| 1  | -1.565246 | 3.220617  | -1.941143 |
| 1  | -4.042946 | 3.337422  | -2.162372 |
| 7  | 1.381328  | -0.116766 | 0.636348  |
| 6  | 1.709060  | -0.786866 | -0.493377 |
| 8  | 1.510110  | -0.357878 | -1.629219 |
| 6  | 1.806432  | -0.589629 | 1.939691  |
| 1  | 1.673741  | 0.259846  | 2.631565  |
| 6  | 3.306996  | -0.850600 | 1.963555  |
| 8  | 4.121078  | -0.304456 | 1.261237  |
| 8  | 3.654113  | -1.729654 | 2.923449  |
| 1  | 4.621448  | -1.783387 | 2.886443  |
| 6  | 0.951784  | -1.736541 | 2.471182  |
| 1  | 1.223304  | -1.970877 | 3.504854  |
| 1  | -0.104792 | -1.447300 | 2.435153  |
| 1  | 1.078724  | -2.635097 | 1.861200  |
| 8  | 2.205502  | -2.008688 | -0.220612 |
| 6  | 2.843951  | -2.823523 | -1.241642 |
| 6  | 3.303891  | -4.029498 | -0.440771 |
| 1  | 3.825175  | -4.743251 | -1.088916 |
| 1  | 3.987442  | -3.717066 | 0.358461  |
| 1  | 2.441874  | -4.530802 | 0.016387  |

|   |          |           |           |
|---|----------|-----------|-----------|
| 6 | 1.843175 | -3.246069 | -2.306020 |
| 1 | 0.959412 | -3.696375 | -1.835506 |
| 1 | 1.535187 | -2.394191 | -2.917858 |
| 1 | 2.304074 | -3.998553 | -2.958083 |
| 6 | 4.027693 | -2.066971 | -1.819755 |
| 1 | 3.694336 | -1.190019 | -2.381615 |
| 1 | 4.686498 | -1.729933 | -1.010577 |
| 1 | 4.595506 | -2.724238 | -2.489837 |

-----  
 ---  
**(3e')**  
 -----  
 ---

Number of imaginary frequencies : 0

Electronic energy :        =-2241.8262095  
 Zero-point correction=                0.500609  
 Thermal correction to Energy=        0.538831  
 Thermal correction to Enthalpy=       0.539775  
 Thermal correction to Gibbs Free Energy=   0.426459  
 Sum of electronic and zero-point Energies=   -2241.325601  
 Sum of electronic and thermal Energies=   -2241.287378  
 Sum of electronic and thermal Enthalpies=   -2241.286434  
 Sum of electronic and thermal Free Energies=   -2241.399750

.....  
 Cartesian Coordinates  
 .....

|    |           |           |           |
|----|-----------|-----------|-----------|
| 46 | -1.216438 | -1.041633 | 0.017394  |
| 6  | 3.234058  | 1.742503  | -0.975389 |
| 1  | 3.948124  | 1.595518  | -1.793039 |
| 1  | 2.197925  | 1.682472  | -1.346994 |
| 8  | 2.391880  | 0.171108  | 1.041700  |
| 6  | 3.771156  | -2.095541 | -0.749612 |
| 6  | 2.851987  | -3.062076 | -0.310568 |
| 6  | 5.112769  | -2.424972 | -0.883569 |
| 6  | 3.283088  | -4.362379 | -0.021466 |
| 6  | 5.531191  | -3.717553 | -0.591874 |
| 1  | 5.806980  | -1.655930 | -1.207225 |
| 6  | 4.622687  | -4.685402 | -0.164934 |
| 1  | 2.560463  | -5.101109 | 0.314091  |
| 1  | 6.582223  | -3.973465 | -0.697801 |
| 1  | 4.962375  | -5.692797 | 0.057565  |
| 6  | 1.489258  | -2.684815 | -0.170849 |
| 7  | 0.382863  | -2.361886 | -0.064496 |
| 6  | -1.772000 | 1.750016  | -0.211957 |

|    |           |           |           |
|----|-----------|-----------|-----------|
| 6  | -0.470792 | 1.472835  | -0.947144 |
| 8  | -0.099599 | 0.222124  | -1.044190 |
| 8  | 0.210655  | 2.386611  | -1.389987 |
| 1  | -2.363991 | 2.430793  | -0.835738 |
| 7  | -2.487650 | 0.491021  | -0.032385 |
| 6  | -3.807214 | 0.399056  | -0.179411 |
| 8  | -4.457060 | -0.660839 | -0.249106 |
| 8  | 3.312911  | -0.850194 | -1.087062 |
| 16 | 3.481287  | 0.335866  | 0.101107  |
| 8  | 4.858337  | 0.260556  | 0.554246  |
| 6  | 3.496502  | 2.990125  | -0.186166 |
| 6  | 2.450816  | 3.607283  | 0.500835  |
| 6  | 4.787661  | 3.512343  | -0.092767 |
| 6  | 2.694190  | 4.744692  | 1.261334  |
| 1  | 1.448847  | 3.194714  | 0.408317  |
| 6  | 5.028153  | 4.650803  | 0.666256  |
| 1  | 5.605070  | 3.017129  | -0.615083 |
| 6  | 3.980795  | 5.267902  | 1.344545  |
| 1  | 1.873625  | 5.225744  | 1.789065  |
| 1  | 6.035223  | 5.055846  | 0.731840  |
| 1  | 4.169509  | 6.159149  | 1.938878  |
| 8  | -2.173191 | -2.419377 | 1.317510  |
| 6  | -3.084488 | -3.222076 | 1.062045  |
| 8  | -3.982799 | -3.059631 | 0.149768  |
| 6  | -3.207012 | -4.489773 | 1.844444  |
| 1  | -4.156494 | -4.488636 | 2.388541  |
| 1  | -3.235605 | -5.337706 | 1.153293  |
| 1  | -2.375374 | -4.594751 | 2.541232  |
| 1  | -4.046041 | -2.064974 | -0.130249 |
| 6  | -1.461295 | 2.430293  | 1.115224  |
| 1  | -0.955306 | 3.386288  | 0.939447  |
| 1  | -2.388802 | 2.615111  | 1.666407  |
| 1  | -0.809209 | 1.792474  | 1.727525  |
| 8  | -4.414404 | 1.597913  | -0.233547 |
| 6  | -5.849103 | 1.735090  | -0.457094 |
| 6  | -6.235656 | 1.149244  | -1.804630 |
| 1  | -6.107562 | 0.064811  | -1.821367 |
| 1  | -7.286348 | 1.383586  | -2.014583 |
| 1  | -5.623917 | 1.592705  | -2.599054 |
| 6  | -6.626773 | 1.113857  | 0.691394  |
| 1  | -7.690648 | 1.357754  | 0.583915  |
| 1  | -6.512911 | 0.028096  | 0.708354  |
| 1  | -6.278944 | 1.523057  | 1.647298  |
| 6  | -6.035321 | 3.243153  | -0.463962 |
| 1  | -5.715774 | 3.674934  | 0.491016  |
| 1  | -5.445225 | 3.701862  | -1.265150 |
| 1  | -7.090945 | 3.490818  | -0.622941 |

-----  
---  
**(3f')**  
-----  
---

Number of imaginary frequencies : 0

Electronic energy : =-2241.8256832  
Zero-point correction= 0.500823  
Thermal correction to Energy= 0.538748  
Thermal correction to Enthalpy= 0.539692  
Thermal correction to Gibbs Free Energy= 0.428488  
Sum of electronic and zero-point Energies= -2241.324860  
Sum of electronic and thermal Energies= -2241.286935  
Sum of electronic and thermal Enthalpies= -2241.285991  
Sum of electronic and thermal Free Energies= -2241.397195

.....  
Cartesian Coordinates  
.....

|    |           |           |           |
|----|-----------|-----------|-----------|
| 46 | -0.894858 | -1.097242 | -0.133344 |
| 6  | 2.813286  | 2.100774  | -0.795357 |
| 1  | 3.505226  | 2.439724  | -1.573727 |
| 1  | 1.918592  | 1.659791  | -1.257670 |
| 8  | 2.859302  | 0.161688  | 1.072054  |
| 6  | 4.270726  | -1.505724 | -0.963154 |
| 6  | 3.441814  | -2.554274 | -0.532093 |
| 6  | 5.632875  | -1.713492 | -1.121866 |
| 6  | 3.988304  | -3.817716 | -0.282626 |
| 6  | 6.166227  | -2.972127 | -0.868032 |
| 1  | 6.250287  | -0.878291 | -1.438683 |
| 6  | 5.349070  | -4.022266 | -0.453401 |
| 1  | 3.337630  | -4.623201 | 0.046616  |
| 1  | 7.233639  | -3.134287 | -0.993287 |
| 1  | 5.775970  | -5.002298 | -0.260640 |
| 6  | 2.054593  | -2.301356 | -0.345667 |
| 7  | 0.928195  | -2.084075 | -0.196278 |
| 6  | -2.119186 | 1.448989  | -0.874928 |
| 6  | -0.670880 | 1.459079  | -1.315909 |
| 8  | 0.019290  | 0.357390  | -1.115215 |
| 8  | -0.154476 | 2.443521  | -1.812127 |
| 1  | -2.709616 | 1.661848  | -1.776517 |
| 7  | -2.476884 | 0.136845  | -0.334839 |
| 6  | -3.750197 | -0.257626 | -0.359040 |
| 8  | -4.175094 | -1.334453 | 0.107285  |
| 8  | 3.716527  | -0.284887 | -1.251425 |
| 16 | 3.675356  | 0.784024  | 0.047998  |
| 8  | 5.048001  | 1.156522  | 0.335323  |
| 6  | 2.489993  | 3.170678  | 0.202359  |

|   |           |           |           |
|---|-----------|-----------|-----------|
| 6 | 1.359326  | 3.047848  | 1.012490  |
| 6 | 3.327569  | 4.274811  | 0.351594  |
| 6 | 1.056560  | 4.035680  | 1.939698  |
| 1 | 0.727762  | 2.165798  | 0.913478  |
| 6 | 3.023244  | 5.264288  | 1.280003  |
| 1 | 4.220824  | 4.353877  | -0.266705 |
| 6 | 1.885079  | 5.147277  | 2.071013  |
| 1 | 0.168508  | 3.938714  | 2.560461  |
| 1 | 3.676267  | 6.127254  | 1.385503  |
| 1 | 1.644376  | 5.922822  | 2.794605  |
| 8 | -1.482541 | -2.772306 | 1.058075  |
| 6 | -2.236091 | -2.913208 | 2.033243  |
| 8 | -3.321514 | -2.247460 | 2.237953  |
| 6 | -1.927071 | -3.938537 | 3.077779  |
| 1 | -2.019641 | -3.486258 | 4.069395  |
| 1 | -2.668864 | -4.741534 | 3.019702  |
| 1 | -0.926775 | -4.347747 | 2.935185  |
| 1 | -3.621111 | -1.782298 | 1.356435  |
| 6 | -2.351414 | 2.560380  | 0.139808  |
| 1 | -3.418677 | 2.648530  | 0.371426  |
| 1 | -1.812840 | 2.337180  | 1.070363  |
| 1 | -1.985663 | 3.512320  | -0.259206 |
| 8 | -4.574876 | 0.628564  | -0.939103 |
| 6 | -6.025521 | 0.546010  | -0.810900 |
| 6 | -6.422736 | 0.566465  | 0.655593  |
| 1 | -7.509970 | 0.682018  | 0.737517  |
| 1 | -6.132073 | -0.353933 | 1.166752  |
| 1 | -5.951701 | 1.419237  | 1.161117  |
| 6 | -6.481731 | 1.822370  | -1.497304 |
| 1 | -6.154644 | 1.834754  | -2.542768 |
| 1 | -7.574830 | 1.894686  | -1.473151 |
| 1 | -6.060961 | 2.700437  | -0.993275 |
| 6 | -6.556893 | -0.673055 | -1.544660 |
| 1 | -6.205873 | -0.670440 | -2.583129 |
| 1 | -6.232674 | -1.598600 | -1.064574 |
| 1 | -7.653193 | -0.640951 | -1.555965 |

-----  
 ---  
 (3g')  
 -----  
 ---

Number of imaginary frequencies : 0

Electronic energy : =-3031.3688687

Zero-point correction= 0.564992

Thermal correction to Energy= 0.613054

S269

|                                              |              |
|----------------------------------------------|--------------|
| Thermal correction to Enthalpy=              | 0.613999     |
| Thermal correction to Gibbs Free Energy=     | 0.479332     |
| Sum of electronic and zero-point Energies=   | -3030.803876 |
| Sum of electronic and thermal Energies=      | -3030.755814 |
| Sum of electronic and thermal Enthalpies=    | -3030.754870 |
| Sum of electronic and thermal Free Energies= | -3030.889537 |

.....  
 Cartesian Coordinates  
 .....

|    |           |           |           |
|----|-----------|-----------|-----------|
| 46 | -2.253519 | -1.043630 | -0.170573 |
| 6  | 1.698960  | 1.815552  | -2.393841 |
| 1  | 2.094437  | 1.710982  | -3.410394 |
| 1  | 0.596982  | 1.766216  | -2.392168 |
| 8  | 1.599761  | 0.148512  | -0.270972 |
| 6  | 2.277580  | -2.047089 | -2.454555 |
| 6  | 1.551979  | -3.005892 | -1.729640 |
| 6  | 3.492585  | -2.381815 | -3.032454 |
| 6  | 2.054631  | -4.305186 | -1.593742 |
| 6  | 3.983958  | -3.674393 | -2.888917 |
| 1  | 4.038543  | -1.618633 | -3.577943 |
| 6  | 3.270153  | -4.633722 | -2.173205 |
| 1  | 1.484276  | -5.040035 | -1.032611 |
| 1  | 4.938243  | -3.934468 | -3.339015 |
| 1  | 3.664894  | -5.639772 | -2.065982 |
| 6  | 0.306416  | -2.632632 | -1.155454 |
| 7  | -0.706762 | -2.307115 | -0.701251 |
| 6  | -2.934627 | 1.733522  | -0.219976 |
| 6  | -1.822895 | 1.504739  | -1.230214 |
| 8  | -1.464400 | 0.268748  | -1.451127 |
| 8  | -1.277556 | 2.451357  | -1.781927 |
| 1  | -3.668357 | 2.398458  | -0.691680 |
| 7  | -3.559910 | 0.450475  | 0.100895  |
| 6  | -4.866445 | 0.355179  | 0.279233  |
| 8  | -5.518089 | -0.715073 | 0.396253  |
| 8  | 1.745491  | -0.788284 | -2.621205 |
| 16 | 2.278868  | 0.362537  | -1.533453 |
| 8  | 3.737922  | 0.288867  | -1.566181 |
| 6  | 2.227113  | 3.016007  | -1.667911 |
| 6  | 1.466318  | 3.601372  | -0.655404 |
| 6  | 3.500097  | 3.512214  | -1.955411 |
| 6  | 1.975076  | 4.680655  | 0.056921  |
| 1  | 0.472548  | 3.207937  | -0.452045 |
| 6  | 4.004031  | 4.592507  | -1.243398 |
| 1  | 4.097521  | 3.041298  | -2.734951 |
| 6  | 3.242202  | 5.175538  | -0.234301 |
| 1  | 1.379669  | 5.136215  | 0.844446  |
| 1  | 4.995232  | 4.977126  | -1.470836 |
| 1  | 3.639230  | 6.018361  | 0.326709  |
| 8  | -2.815319 | -2.442304 | 1.275349  |

|   |           |           |           |
|---|-----------|-----------|-----------|
| 6 | -3.801808 | -3.212869 | 1.207648  |
| 8 | -4.864663 | -2.990967 | 0.542949  |
| 6 | -3.756190 | -4.497409 | 1.977333  |
| 1 | -4.520420 | -4.470990 | 2.760359  |
| 1 | -4.011558 | -5.325455 | 1.309421  |
| 1 | -2.773387 | -4.654685 | 2.422700  |
| 1 | -5.060091 | -1.884396 | 0.375867  |
| 1 | 4.920776  | 0.049797  | -0.117855 |
| 8 | 5.282472  | -0.192222 | 0.750309  |
| 6 | 4.228067  | -0.231374 | 1.646666  |
| 6 | 3.877962  | 1.171620  | 2.138796  |
| 6 | 4.637086  | -1.169583 | 2.770437  |
| 1 | 3.296664  | -0.638580 | 1.220011  |
| 9 | 2.713952  | 1.183142  | 2.789244  |
| 9 | 3.768550  | 1.988938  | 1.087692  |
| 9 | 4.810727  | 1.673598  | 2.947124  |
| 9 | 3.739949  | -1.153286 | 3.760414  |
| 9 | 5.823491  | -0.860560 | 3.280529  |
| 9 | 4.705225  | -2.418211 | 2.301745  |
| 6 | -2.364379 | 2.420592  | 1.013735  |
| 1 | -1.905309 | 3.373571  | 0.729744  |
| 1 | -3.158876 | 2.611129  | 1.742124  |
| 1 | -1.601987 | 1.788248  | 1.487240  |
| 8 | -5.499537 | 1.530210  | 0.342496  |
| 6 | -6.954829 | 1.651692  | 0.441622  |
| 6 | -7.152658 | 3.157475  | 0.401516  |
| 1 | -6.777047 | 3.572396  | -0.540473 |
| 1 | -8.218308 | 3.397679  | 0.486688  |
| 1 | -6.619621 | 3.638755  | 1.228892  |
| 6 | -7.628431 | 0.998613  | -0.752904 |
| 1 | -7.198702 | 1.380775  | -1.686391 |
| 1 | -7.525176 | -0.088163 | -0.732507 |
| 1 | -8.695785 | 1.249547  | -0.744389 |
| 6 | -7.440453 | 1.089165  | 1.766026  |
| 1 | -7.304358 | 0.007019  | 1.817654  |
| 1 | -6.900976 | 1.557462  | 2.597508  |
| 1 | -8.507096 | 1.314890  | 1.884051  |

---

(3')

---

Number of imaginary frequencies : 0

Electronic energy : =-2802.394762

Zero-point correction= 0.505418

S271

|                                              |              |
|----------------------------------------------|--------------|
| Thermal correction to Energy=                | 0.546941     |
| Thermal correction to Enthalpy=              | 0.547885     |
| Thermal correction to Gibbs Free Energy=     | 0.430074     |
| Sum of electronic and zero-point Energies=   | -2801.889344 |
| Sum of electronic and thermal Energies=      | -2801.847821 |
| Sum of electronic and thermal Enthalpies=    | -2801.846877 |
| Sum of electronic and thermal Free Energies= | -2801.964688 |

.....  
 Cartesian Coordinates  
 .....

|    |           |           |           |
|----|-----------|-----------|-----------|
| 46 | 0.616158  | 0.254611  | -0.920872 |
| 6  | -3.370049 | -2.125610 | -0.571582 |
| 1  | -4.029441 | -2.515224 | -1.354618 |
| 1  | -2.467409 | -1.688936 | -1.024524 |
| 8  | -3.478480 | -0.091949 | 1.183089  |
| 6  | -4.533916 | 1.545872  | -0.933736 |
| 6  | -3.447869 | 2.424821  | -0.797449 |
| 6  | -5.832397 | 2.022497  | -0.848142 |
| 6  | -3.668341 | 3.791470  | -0.599857 |
| 6  | -6.043180 | 3.382755  | -0.646298 |
| 1  | -6.652330 | 1.315974  | -0.941113 |
| 6  | -4.969960 | 4.265002  | -0.527792 |
| 1  | -2.817308 | 4.459774  | -0.498042 |
| 1  | -7.060348 | 3.760115  | -0.580568 |
| 1  | -5.150158 | 5.324853  | -0.373536 |
| 6  | -2.139610 | 1.873084  | -0.833613 |
| 7  | -1.093733 | 1.378094  | -0.849746 |
| 6  | 1.715246  | -2.422986 | -1.066472 |
| 6  | 0.241798  | -2.491766 | -1.471903 |
| 8  | -0.420588 | -1.354305 | -1.494795 |
| 8  | -0.284990 | -3.559502 | -1.704222 |
| 1  | 2.287856  | -2.981745 | -1.818242 |
| 7  | 2.154738  | -1.026303 | -1.040376 |
| 6  | 3.417510  | -0.711663 | -0.993669 |
| 8  | 3.850840  | 0.506636  | -0.897314 |
| 8  | -4.283187 | 0.222692  | -1.181973 |
| 16 | -4.272012 | -0.773475 | 0.178745  |
| 8  | -5.649634 | -1.132580 | 0.452303  |
| 6  | -3.046178 | -3.130331 | 0.489515  |
| 6  | -1.853495 | -3.013664 | 1.204247  |
| 6  | -3.941288 | -4.152949 | 0.800851  |
| 6  | -1.551386 | -3.924399 | 2.207883  |
| 1  | -1.172503 | -2.196743 | 0.963863  |
| 6  | -3.637527 | -5.064699 | 1.805197  |
| 1  | -4.878456 | -4.230765 | 0.251259  |
| 6  | -2.441649 | -4.952106 | 2.507312  |
| 1  | -0.618623 | -3.832179 | 2.759950  |
| 1  | -4.335929 | -5.864204 | 2.040074  |
| 1  | -2.203274 | -5.666376 | 3.292080  |



|   |          |           |           |
|---|----------|-----------|-----------|
| 8 | 1.797283 | 1.834460  | -0.355683 |
| 1 | 3.084400 | 1.161095  | -0.680952 |
| 6 | 1.553885 | 2.356247  | 0.894320  |
| 6 | 1.640615 | 3.877937  | 0.791559  |
| 6 | 2.519322 | 1.769257  | 1.923221  |
| 1 | 0.539144 | 2.135973  | 1.271268  |
| 9 | 2.802743 | 4.272939  | 0.281955  |
| 9 | 0.665449 | 4.317274  | -0.010177 |
| 9 | 1.482962 | 4.469688  | 1.978124  |
| 9 | 3.787676 | 2.065443  | 1.622333  |
| 9 | 2.272533 | 2.196946  | 3.158875  |
| 9 | 2.411261 | 0.433596  | 1.932419  |
| 6 | 1.878323 | -3.081776 | 0.297809  |
| 1 | 1.448192 | -4.087842 | 0.272846  |
| 1 | 2.936531 | -3.146730 | 0.573515  |
| 1 | 1.357232 | -2.491061 | 1.064104  |
| 8 | 4.301908 | -1.683525 | -1.085324 |
| 6 | 5.679935 | -1.568595 | -0.569095 |
| 6 | 5.648143 | -1.062306 | 0.862408  |
| 1 | 5.370262 | -0.007230 | 0.925183  |
| 1 | 4.937142 | -1.648902 | 1.458532  |
| 1 | 6.642728 | -1.182751 | 1.306865  |
| 6 | 6.154645 | -3.008987 | -0.618895 |
| 1 | 7.194052 | -3.070230 | -0.278657 |
| 1 | 5.538640 | -3.644071 | 0.028033  |
| 1 | 6.099568 | -3.398414 | -1.641026 |
| 6 | 6.507705 | -0.694909 | -1.492034 |
| 1 | 6.452239 | -1.070036 | -2.520118 |
| 1 | 6.172927 | 0.344609  | -1.474903 |
| 1 | 7.556233 | -0.729561 | -1.173355 |

-----  
 ---  
 Possibilities of C-H Bond Activation Transition States at *meta*, *ortho* and *para* Positions at the /M06/6-31G\*\* Level of Theory  
 -----

---  
 C-H activation [**A'-to-F'**]  
 -----

---  
*meta*-**B'**  
 -----  
 ---

Number of imaginary frequencies : 1  
 The smallest frequency is : -1523.7765 cm(-1)

Electronic energy : =-2241.7935358  
 Zero-point correction= 0.496579

S273

|                                              |              |
|----------------------------------------------|--------------|
| Thermal correction to Energy=                | 0.534385     |
| Thermal correction to Enthalpy=              | 0.535329     |
| Thermal correction to Gibbs Free Energy=     | 0.425779     |
| Sum of electronic and zero-point Energies=   | -2241.296957 |
| Sum of electronic and thermal Energies=      | -2241.259151 |
| Sum of electronic and thermal Enthalpies=    | -2241.258207 |
| Sum of electronic and thermal Free Energies= | -2241.367757 |

.....  
 Cartesian Coordinates  
 .....

|    |           |           |           |
|----|-----------|-----------|-----------|
| 46 | -0.538519 | 1.965150  | -0.051652 |
| 6  | 3.170775  | 2.849258  | 1.486961  |
| 6  | 1.952010  | 3.173118  | 0.901744  |
| 6  | 1.537473  | 2.571104  | -0.298712 |
| 6  | 2.399611  | 1.642222  | -0.905320 |
| 6  | 3.622922  | 1.312727  | -0.331731 |
| 6  | 3.997811  | 1.916705  | 0.874013  |
| 1  | 2.095925  | 1.154510  | -1.832786 |
| 1  | 0.866510  | 3.381157  | -1.079008 |
| 1  | 1.296903  | 3.902090  | 1.378993  |
| 1  | 4.945541  | 1.642389  | 1.335241  |
| 6  | 4.515527  | 0.296097  | -0.966713 |
| 8  | 4.372347  | -1.250879 | 1.239524  |
| 6  | 2.191793  | -2.683071 | -0.075681 |
| 6  | 0.930826  | -2.361823 | 0.445104  |
| 6  | 2.691664  | -3.971344 | 0.027663  |
| 6  | 0.150633  | -3.350146 | 1.057286  |
| 6  | 1.919548  | -4.940572 | 0.660783  |
| 1  | 3.668925  | -4.199558 | -0.389490 |
| 6  | 0.656477  | -4.637404 | 1.165308  |
| 1  | -0.840303 | -3.079131 | 1.414158  |
| 1  | 2.309060  | -5.951584 | 0.749051  |
| 1  | 0.061253  | -5.410063 | 1.643472  |
| 6  | 0.461264  | -1.025744 | 0.320148  |
| 7  | 0.116273  | 0.068586  | 0.181552  |
| 6  | -0.780390 | 4.632551  | -1.103388 |
| 8  | 0.323290  | 4.434966  | -1.677813 |
| 6  | -1.524645 | 5.900216  | -1.410619 |
| 1  | -0.825005 | 6.737283  | -1.468071 |
| 1  | -1.995692 | 5.793978  | -2.393423 |
| 1  | -2.298849 | 6.086624  | -0.665270 |
| 1  | 3.474993  | 3.312869  | 2.421802  |
| 8  | -1.331047 | 3.832776  | -0.287788 |
| 6  | -3.906725 | 0.322626  | 1.924920  |
| 6  | -2.553324 | 0.979531  | 1.590065  |
| 8  | -2.433053 | 1.270368  | 0.331735  |
| 8  | -1.740982 | 1.210865  | 2.473809  |
| 1  | -4.622188 | 1.151477  | 2.019910  |
| 7  | -4.406565 | -0.499988 | 0.829862  |

|    |           |           |           |
|----|-----------|-----------|-----------|
| 1  | -5.052083 | -0.069975 | 0.183465  |
| 6  | -3.592135 | -1.428180 | 0.258039  |
| 8  | -2.569697 | -1.862518 | 0.762492  |
| 16 | 4.410417  | -1.330589 | -0.205361 |
| 8  | 2.874688  | -1.683422 | -0.737704 |
| 8  | 5.331585  | -2.226909 | -0.875653 |
| 1  | 5.582098  | 0.536858  | -0.874447 |
| 1  | 4.295732  | 0.121783  | -2.025855 |
| 6  | -3.855670 | -0.438725 | 3.236038  |
| 1  | -4.847770 | -0.832291 | 3.481062  |
| 1  | -3.151974 | -1.271741 | 3.157222  |
| 1  | -3.513831 | 0.220171  | 4.037489  |
| 8  | -4.108440 | -1.810043 | -0.924460 |
| 6  | -3.404618 | -2.745320 | -1.783916 |
| 6  | -3.338035 | -4.115976 | -1.129598 |
| 1  | -2.904023 | -4.836934 | -1.833211 |
| 1  | -2.723897 | -4.094989 | -0.225040 |
| 1  | -4.345078 | -4.459523 | -0.865803 |
| 6  | -2.025999 | -2.210583 | -2.140382 |
| 1  | -1.332043 | -2.311409 | -1.303553 |
| 1  | -1.627516 | -2.767779 | -2.996839 |
| 1  | -2.090087 | -1.150374 | -2.414274 |
| 6  | -4.286166 | -2.789393 | -3.020529 |
| 1  | -4.340647 | -1.800179 | -3.488664 |
| 1  | -3.879758 | -3.499402 | -3.749686 |
| 1  | -5.302232 | -3.102767 | -2.756610 |

-----  
---  
*meta-B'*  
-----  
---

Number of imaginary frequencies : 1  
The smallest frequency is : -1556.2727 cm(-1)

Electronic energy : =-2241.7879468  
Zero-point correction= 0.496487  
Thermal correction to Energy= 0.534604  
Thermal correction to Enthalpy= 0.535548  
Thermal correction to Gibbs Free Energy= 0.422905  
Sum of electronic and zero-point Energies= -2241.291460  
Sum of electronic and thermal Energies= -2241.253343  
Sum of electronic and thermal Enthalpies= -2241.252398  
Sum of electronic and thermal Free Energies= -2241.365042

-----  
Cartesian Coordinates  
-----

|    |           |           |           |
|----|-----------|-----------|-----------|
| 46 | -0.097198 | 1.203743  | 0.115420  |
| 6  | 3.194766  | 2.936829  | 1.911187  |
| 6  | 1.913178  | 2.959293  | 1.372345  |
| 6  | 1.662793  | 2.485105  | 0.072956  |
| 6  | 2.750218  | 1.997894  | -0.676297 |
| 6  | 4.034743  | 1.964608  | -0.147407 |
| 6  | 4.245984  | 2.434748  | 1.155379  |
| 1  | 2.577452  | 1.613430  | -1.682648 |
| 1  | 0.751296  | 3.174845  | -0.549473 |
| 1  | 1.083303  | 3.354429  | 1.958423  |
| 1  | 5.248480  | 2.394324  | 1.579192  |
| 6  | 5.178851  | 1.408117  | -0.932710 |
| 8  | 5.562413  | -0.433728 | 0.998414  |
| 6  | 4.014200  | -2.265883 | -0.580920 |
| 6  | 2.729403  | -2.378739 | -0.039183 |
| 6  | 4.866847  | -3.356753 | -0.599240 |
| 6  | 2.279877  | -3.596324 | 0.482514  |
| 6  | 4.418796  | -4.562982 | -0.066940 |
| 1  | 5.860497  | -3.252955 | -1.027572 |
| 6  | 3.137015  | -4.687200 | 0.467598  |
| 1  | 1.271844  | -3.645529 | 0.889839  |
| 1  | 5.083208  | -5.423130 | -0.076001 |
| 1  | 2.805806  | -5.639229 | 0.871862  |
| 6  | 1.883107  | -1.242818 | -0.033950 |
| 7  | 1.169188  | -0.336412 | -0.030634 |
| 6  | -1.215072 | 3.812824  | -0.357807 |
| 8  | -0.138025 | 4.094498  | -0.944365 |
| 6  | -2.347162 | 4.798114  | -0.411557 |
| 1  | -2.952770 | 4.733003  | 0.494351  |
| 1  | -1.964419 | 5.809403  | -0.559087 |
| 1  | -2.986267 | 4.540521  | -1.262708 |
| 1  | 3.377140  | 3.301887  | 2.918564  |
| 8  | -1.440955 | 2.734741  | 0.274825  |
| 6  | -3.078325 | -1.928456 | 0.607762  |
| 6  | -1.728236 | -1.206015 | 0.713837  |
| 8  | -1.742145 | -0.018008 | 0.194332  |
| 8  | -0.792742 | -1.790845 | 1.242274  |
| 1  | -3.370106 | -2.183742 | 1.638056  |
| 7  | -4.088940 | -1.073189 | 0.022314  |
| 1  | -3.798000 | -0.155608 | -0.287465 |
| 6  | -5.406872 | -1.362271 | 0.141642  |
| 8  | -5.846810 | -2.383657 | 0.640285  |
| 16 | 5.655180  | -0.256840 | -0.435444 |
| 8  | 4.363088  | -1.046632 | -1.126542 |
| 8  | 6.847349  | -0.644843 | -1.160716 |
| 1  | 6.109522  | 1.973440  | -0.797809 |
| 1  | 4.978322  | 1.335607  | -2.007313 |
| 6  | -2.902227 | -3.223149 | -0.176127 |
| 1  | -3.851089 | -3.766729 | -0.196091 |

|   |           |           |           |
|---|-----------|-----------|-----------|
| 1 | -2.600156 | -3.003862 | -1.207500 |
| 1 | -2.135839 | -3.844909 | 0.295344  |
| 8 | -6.141730 | -0.354782 | -0.380612 |
| 6 | -7.590812 | -0.439597 | -0.411623 |
| 6 | -8.150771 | -0.507471 | 1.000079  |
| 1 | -9.244662 | -0.434157 | 0.963803  |
| 1 | -7.873489 | -1.443931 | 1.488790  |
| 1 | -7.772185 | 0.331198  | 1.596515  |
| 6 | -8.034640 | -1.620819 | -1.260104 |
| 1 | -7.752637 | -2.568489 | -0.795458 |
| 1 | -9.124379 | -1.595645 | -1.382675 |
| 1 | -7.577836 | -1.561888 | -2.255331 |
| 6 | -7.990097 | 0.867428  | -1.075851 |
| 1 | -7.552099 | 0.939383  | -2.077792 |
| 1 | -9.080728 | 0.928683  | -1.166179 |
| 1 | -7.640664 | 1.721223  | -0.484302 |

-----  
---  
*meta-C'*  
-----  
---

Number of imaginary frequencies : 1  
The smallest frequency is : -1443.1205 cm(-1)

Electronic energy : =-2012.8022092  
Zero-point correction= 0.432409  
Thermal correction to Energy= 0.464347  
Thermal correction to Enthalpy= 0.465291  
Thermal correction to Gibbs Free Energy= 0.368806  
Sum of electronic and zero-point Energies= -2012.369800  
Sum of electronic and thermal Energies= -2012.337862  
Sum of electronic and thermal Enthalpies= -2012.336918  
Sum of electronic and thermal Free Energies= -2012.433403

.....  
Cartesian Coordinates  
.....

|    |           |           |           |
|----|-----------|-----------|-----------|
| 46 | -0.804742 | 0.819640  | 0.144382  |
| 6  | -0.420392 | -1.272750 | 0.680203  |
| 6  | -0.374080 | -1.359084 | 2.082713  |
| 6  | 0.692476  | -1.966070 | 2.735829  |
| 6  | 1.732557  | -2.502981 | 1.986752  |
| 6  | 1.701765  | -2.468055 | 0.589349  |
| 6  | 0.626234  | -1.857461 | -0.051664 |
| 1  | 2.585571  | -2.959853 | 2.488207  |
| 1  | 0.724144  | -2.015080 | 3.821600  |
| 1  | -1.192259 | -0.931342 | 2.662366  |

|    |           |           |           |
|----|-----------|-----------|-----------|
| 1  | 0.620077  | -1.793231 | -1.140540 |
| 6  | 2.849569  | -3.038063 | -0.181522 |
| 1  | 2.538859  | -3.652729 | -1.036176 |
| 1  | 3.529233  | -3.631427 | 0.439646  |
| 8  | 3.140593  | -0.987814 | -1.892465 |
| 6  | 4.671942  | 0.385480  | 0.176207  |
| 6  | 3.790736  | 1.474754  | 0.118447  |
| 6  | 6.037974  | 0.574286  | 0.045159  |
| 6  | 4.298500  | 2.767123  | -0.055489 |
| 6  | 6.530746  | 1.863558  | -0.131411 |
| 1  | 6.692157  | -0.292118 | 0.083363  |
| 6  | 5.667331  | 2.955700  | -0.178305 |
| 1  | 3.608696  | 3.605438  | -0.099184 |
| 1  | 7.602020  | 2.015095  | -0.233837 |
| 1  | 6.062756  | 3.957999  | -0.314768 |
| 6  | 2.386368  | 1.262838  | 0.209146  |
| 7  | 1.240390  | 1.109652  | 0.259072  |
| 6  | -3.443014 | 2.041348  | -0.121009 |
| 6  | -2.389060 | 3.141448  | -0.279699 |
| 8  | -1.131576 | 2.776996  | -0.228778 |
| 8  | -2.738502 | 4.296292  | -0.423817 |
| 1  | -4.071438 | 2.070550  | -1.022918 |
| 7  | -2.787441 | 0.739309  | -0.023585 |
| 6  | -3.430503 | -0.394299 | -0.228985 |
| 8  | -2.875143 | -1.532918 | -0.169521 |
| 1  | -1.652925 | -1.340450 | 0.171255  |
| 8  | 4.163376  | -0.876257 | 0.403107  |
| 8  | 5.155209  | -2.397629 | -1.348893 |
| 16 | 3.895283  | -1.798472 | -0.958783 |
| 6  | -4.299649 | 2.352151  | 1.097958  |
| 1  | -4.720398 | 3.356666  | 0.992893  |
| 1  | -5.113641 | 1.627388  | 1.204788  |
| 1  | -3.683992 | 2.327542  | 2.005892  |
| 8  | -4.725951 | -0.271808 | -0.511906 |
| 6  | -5.635930 | -1.413848 | -0.594202 |
| 6  | -5.264358 | -2.303227 | -1.767174 |
| 1  | -5.212057 | -1.711285 | -2.688159 |
| 1  | -4.303601 | -2.797614 | -1.608360 |
| 1  | -6.037540 | -3.069726 | -1.899192 |
| 6  | -5.655314 | -2.161436 | 0.727739  |
| 1  | -4.705286 | -2.664836 | 0.921351  |
| 1  | -5.867039 | -1.467266 | 1.550387  |
| 1  | -6.451787 | -2.914554 | 0.705452  |
| 6  | -6.973857 | -0.737735 | -0.839094 |
| 1  | -7.764840 | -1.491045 | -0.924734 |
| 1  | -7.221185 | -0.062900 | -0.011507 |
| 1  | -6.946846 | -0.152792 | -1.764795 |

-----  
---  
*ortho-B'*  
-----  
---

Number of imaginary frequencies : 1  
The smallest frequency is : -1527.3965 cm(-1)

Electronic energy : =-2241.7802871  
Zero-point correction= 0.495255  
Thermal correction to Energy= 0.533879  
Thermal correction to Enthalpy= 0.534823  
Thermal correction to Gibbs Free Energy= 0.417959  
Sum of electronic and zero-point Energies= -2241.285032  
Sum of electronic and thermal Energies= -2241.246408  
Sum of electronic and thermal Enthalpies= -2241.245464  
Sum of electronic and thermal Free Energies= -2241.362328

.....  
Cartesian Coordinates  
.....

|    |           |           |           |
|----|-----------|-----------|-----------|
| 46 | -0.184884 | 1.152450  | -0.379290 |
| 6  | -2.250243 | 1.888609  | -0.482433 |
| 1  | -1.650271 | 2.736397  | 0.290631  |
| 8  | -1.184858 | 3.718430  | 1.067188  |
| 8  | 0.713759  | 2.884044  | 0.215295  |
| 6  | -2.422430 | 2.240775  | -1.831537 |
| 6  | -3.578429 | 1.900409  | -2.523259 |
| 6  | -4.601247 | 1.240104  | -1.851288 |
| 6  | -4.482688 | 0.924959  | -0.497710 |
| 6  | -3.305615 | 1.221444  | 0.183519  |
| 1  | -1.617641 | 2.767138  | -2.344481 |
| 1  | -3.685612 | 2.153520  | -3.574985 |
| 1  | -5.516644 | 0.979599  | -2.378185 |
| 1  | -5.309416 | 0.442566  | 0.018206  |
| 6  | -3.139103 | 0.956184  | 1.655539  |
| 1  | -3.631851 | 1.725115  | 2.268372  |
| 1  | -2.081621 | 0.936607  | 1.947264  |
| 8  | -5.221557 | -0.714801 | 1.992105  |
| 6  | -3.527579 | -2.447361 | 0.459244  |
| 6  | -2.894457 | -2.396920 | -0.795326 |
| 6  | -4.610468 | -3.289691 | 0.660154  |
| 6  | -3.344562 | -3.199686 | -1.846819 |
| 6  | -5.057683 | -4.074149 | -0.398248 |
| 1  | -5.088792 | -3.326608 | 1.633386  |
| 6  | -4.430223 | -4.037134 | -1.642591 |
| 1  | -2.841156 | -3.152023 | -2.808223 |
| 1  | -5.906367 | -4.734916 | -0.242661 |

|    |           |           |           |
|----|-----------|-----------|-----------|
| 1  | -4.788628 | -4.664973 | -2.452922 |
| 6  | -1.833883 | -1.461781 | -0.920838 |
| 7  | -1.030543 | -0.629315 | -0.884528 |
| 6  | 0.057597  | 3.754339  | 0.864030  |
| 6  | 0.846536  | 4.919779  | 1.387594  |
| 1  | 0.302176  | 5.420266  | 2.189846  |
| 1  | 1.829151  | 4.586429  | 1.727372  |
| 1  | 1.000035  | 5.630333  | 0.568715  |
| 6  | 3.581273  | -0.108700 | -1.810038 |
| 6  | 2.160365  | 0.426431  | -1.633366 |
| 8  | 1.699684  | 0.350096  | -0.421452 |
| 8  | 1.555204  | 0.870350  | -2.600705 |
| 1  | 4.189901  | 0.748485  | -2.137567 |
| 7  | 4.111322  | -0.612752 | -0.559260 |
| 1  | 3.499374  | -0.612923 | 0.245083  |
| 6  | 5.448060  | -0.749142 | -0.376941 |
| 8  | 6.282633  | -0.583586 | -1.248862 |
| 16 | -3.818747 | -0.565917 | 2.325924  |
| 8  | -3.344623 | -0.699983 | 3.680691  |
| 8  | -2.960037 | -1.703287 | 1.462412  |
| 6  | 3.606093  | -1.162405 | -2.909238 |
| 1  | 4.636333  | -1.489514 | -3.076499 |
| 1  | 3.004138  | -2.030934 | -2.615992 |
| 1  | 3.200233  | -0.747357 | -3.835602 |
| 8  | 5.697110  | -1.101656 | 0.903520  |
| 6  | 7.060081  | -1.322726 | 1.354084  |
| 6  | 7.869085  | -0.040598 | 1.237911  |
| 1  | 8.856198  | -0.186197 | 1.693885  |
| 1  | 8.000443  | 0.248157  | 0.192501  |
| 1  | 7.363525  | 0.773380  | 1.771254  |
| 6  | 7.695973  | -2.471522 | 0.587111  |
| 1  | 7.840574  | -2.213415 | -0.464361 |
| 1  | 8.669544  | -2.712552 | 1.031423  |
| 1  | 7.062151  | -3.364097 | 0.650210  |
| 6  | 6.873944  | -1.701586 | 2.813629  |
| 1  | 6.260429  | -2.605388 | 2.900191  |
| 1  | 7.846472  | -1.892503 | 3.281728  |
| 1  | 6.375596  | -0.892828 | 3.359846  |

-----  
---  
*ortho-C'*  
-----  
---

Number of imaginary frequencies : 1  
The smallest frequency is : -1451.0848 cm(-1)



Electronic energy :       =-2012.7943168  
 Zero-point correction=           0.432096  
 Thermal correction to Energy=       0.464138  
 Thermal correction to Enthalpy=     0.465082  
 Thermal correction to Gibbs Free Energy=   0.368841  
 Sum of electronic and zero-point Energies=   -2012.362221  
 Sum of electronic and thermal Energies=   -2012.330179  
 Sum of electronic and thermal Enthalpies=   -2012.329235  
 Sum of electronic and thermal Free Energies=   -2012.425476

.....  
 Cartesian Coordinates  
 .....

|    |           |           |           |
|----|-----------|-----------|-----------|
| 46 | -0.416895 | 0.979086  | 0.663765  |
| 6  | -0.220491 | -0.866539 | 2.903598  |
| 6  | 0.696654  | -1.475325 | 3.750494  |
| 6  | 1.673467  | -2.309532 | 3.212646  |
| 6  | 1.720452  | -2.541185 | 1.842605  |
| 6  | 0.818758  | -1.905692 | 0.989358  |
| 6  | -0.166891 | -1.040307 | 1.509051  |
| 1  | 2.467730  | -3.218812 | 1.431614  |
| 1  | 2.391382  | -2.800053 | 3.866196  |
| 1  | 0.648614  | -1.311467 | 4.824456  |
| 1  | -1.307202 | -1.136355 | 0.830086  |
| 6  | 0.846480  | -2.242450 | -0.471878 |
| 1  | -0.111739 | -2.011340 | -0.956781 |
| 1  | 1.084804  | -3.298000 | -0.644822 |
| 8  | 1.657343  | -0.014620 | -1.798669 |
| 6  | 4.230399  | -0.308773 | -0.567229 |
| 6  | 3.983545  | 0.939386  | 0.029936  |
| 6  | 5.416527  | -0.541483 | -1.243402 |
| 6  | 4.950047  | 1.946466  | -0.043051 |
| 6  | 6.373222  | 0.466811  | -1.305754 |
| 1  | 5.567614  | -1.512860 | -1.706546 |
| 6  | 6.145338  | 1.702758  | -0.704250 |
| 1  | 4.747592  | 2.911875  | 0.412117  |
| 1  | 7.306227  | 0.285480  | -1.832840 |
| 1  | 6.898103  | 2.483503  | -0.761472 |
| 6  | 2.709755  | 1.150631  | 0.625190  |
| 7  | 1.629515  | 1.243455  | 1.034390  |
| 6  | -2.898210 | 2.113618  | -0.393584 |
| 6  | -1.837738 | 3.218178  | -0.359609 |
| 8  | -0.632422 | 2.878501  | 0.025493  |
| 8  | -2.137136 | 4.352248  | -0.675660 |
| 1  | -3.230127 | 2.030721  | -1.438983 |
| 7  | -2.304678 | 0.848358  | 0.032510  |
| 6  | -2.873829 | -0.315189 | -0.206607 |
| 8  | -2.368284 | -1.424564 | 0.157037  |
| 1  | -0.995563 | -0.226361 | 3.323382  |
| 8  | 3.314489  | -1.324958 | -0.430186 |

|    |           |           |           |
|----|-----------|-----------|-----------|
| 8  | 2.448177  | -2.267271 | -2.593306 |
| 16 | 2.047426  | -1.380985 | -1.520463 |
| 6  | -4.078684 | 2.514669  | 0.477132  |
| 1  | -3.763747 | 2.598753  | 1.524433  |
| 1  | -4.451193 | 3.489353  | 0.148146  |
| 1  | -4.883505 | 1.774170  | 0.409068  |
| 8  | -4.025815 | -0.268481 | -0.871141 |
| 6  | -4.930979 | -1.413846 | -0.975367 |
| 6  | -6.111908 | -0.820219 | -1.723324 |
| 1  | -6.886537 | -1.581670 | -1.866848 |
| 1  | -6.543637 | 0.016023  | -1.161795 |
| 1  | -5.798933 | -0.451216 | -2.706005 |
| 6  | -4.296000 | -2.529743 | -1.786236 |
| 1  | -3.933550 | -2.141356 | -2.745023 |
| 1  | -3.463464 | -2.994073 | -1.253397 |
| 1  | -5.051829 | -3.296644 | -1.994209 |
| 6  | -5.349284 | -1.861613 | 0.413652  |
| 1  | -4.509676 | -2.286356 | 0.969721  |
| 1  | -5.759523 | -1.013843 | 0.976412  |
| 1  | -6.131917 | -2.624902 | 0.330233  |

-----  
---  
*ortho-F'*  
-----  
---

Number of imaginary frequencies : 1  
The smallest frequency is : -1493.9133 cm(-1)

Electronic energy : =-2241.7785293  
Zero-point correction= 0.495707  
Thermal correction to Energy= 0.534141  
Thermal correction to Enthalpy= 0.535085  
Thermal correction to Gibbs Free Energy= 0.420838  
Sum of electronic and zero-point Energies= -2241.282823  
Sum of electronic and thermal Energies= -2241.244389  
Sum of electronic and thermal Enthalpies= -2241.243445  
Sum of electronic and thermal Free Energies= -2241.357691

-----  
Cartesian Coordinates  
-----

|    |           |           |          |
|----|-----------|-----------|----------|
| 46 | -0.173231 | 0.903367  | 0.245049 |
| 6  | -1.263636 | -0.504997 | 1.534092 |
| 1  | -0.119655 | -1.099008 | 1.311934 |
| 6  | -1.409754 | 0.195706  | 2.742621 |
| 6  | -2.608887 | 0.182758  | 3.444412 |
| 6  | -3.667707 | -0.579790 | 2.963041 |

|    |           |           |           |
|----|-----------|-----------|-----------|
| 6  | -3.536406 | -1.329830 | 1.794591  |
| 6  | -2.352328 | -1.275873 | 1.063203  |
| 1  | -0.569795 | 0.783392  | 3.114107  |
| 1  | -2.715726 | 0.754199  | 4.363045  |
| 1  | -4.607191 | -0.611352 | 3.510556  |
| 1  | -4.364585 | -1.949117 | 1.458287  |
| 6  | -2.129100 | -2.099827 | -0.176299 |
| 1  | -1.873627 | -3.142364 | 0.063411  |
| 1  | -1.311446 | -1.696020 | -0.786717 |
| 8  | -4.694712 | -2.753054 | -0.674724 |
| 6  | -4.814992 | 0.017351  | -1.366305 |
| 6  | -4.543069 | 1.227978  | -0.705357 |
| 6  | -6.124456 | -0.350361 | -1.636766 |
| 6  | -5.588343 | 2.072483  | -0.321387 |
| 6  | -7.156794 | 0.492622  | -1.238877 |
| 1  | -6.322426 | -1.285857 | -2.149921 |
| 6  | -6.895967 | 1.698531  | -0.589978 |
| 1  | -5.361600 | 3.006694  | 0.184462  |
| 1  | -8.183609 | 0.205460  | -1.449617 |
| 1  | -7.715577 | 2.347127  | -0.295252 |
| 6  | -3.177849 | 1.496565  | -0.423904 |
| 7  | -2.040093 | 1.564094  | -0.220852 |
| 6  | 1.788124  | 4.441115  | -0.779880 |
| 6  | 1.053760  | 3.328644  | -0.065308 |
| 8  | 0.712890  | 2.360022  | -0.869749 |
| 8  | 0.823326  | 3.355016  | 1.137681  |
| 1  | 2.739580  | 4.063184  | -1.167533 |
| 1  | 1.973602  | 5.264936  | -0.087903 |
| 6  | 3.325121  | -1.512047 | 1.019844  |
| 6  | 1.900140  | -1.006944 | 0.926142  |
| 8  | 1.726745  | 0.197940  | 0.586761  |
| 8  | 0.983782  | -1.816193 | 1.230801  |
| 1  | 3.371892  | -2.448105 | 0.444840  |
| 7  | 4.234764  | -0.557200 | 0.436989  |
| 1  | 3.906371  | 0.379935  | 0.247500  |
| 6  | 5.448407  | -0.961941 | -0.024606 |
| 8  | 5.864422  | -2.101968 | 0.077548  |
| 1  | 1.206210  | 4.790223  | -1.637946 |
| 8  | -3.732478 | -0.707886 | -1.794907 |
| 8  | -2.974091 | -2.940876 | -2.512171 |
| 16 | -3.488985 | -2.290789 | -1.332973 |
| 6  | 3.657951  | -1.824653 | 2.477452  |
| 1  | 4.673453  | -2.227217 | 2.526348  |
| 1  | 3.611281  | -0.911921 | 3.082557  |
| 1  | 2.958692  | -2.561032 | 2.884051  |
| 8  | 6.088874  | 0.077527  | -0.587807 |
| 6  | 7.420941  | -0.094664 | -1.151478 |
| 6  | 7.378225  | -1.080228 | -2.307603 |
| 1  | 8.357829  | -1.108406 | -2.800061 |

|   |          |           |           |
|---|----------|-----------|-----------|
| 1 | 7.128027 | -2.085920 | -1.962143 |
| 1 | 6.634349 | -0.761724 | -3.047418 |
| 6 | 8.399734 | -0.518724 | -0.068565 |
| 1 | 9.417577 | -0.519461 | -0.476868 |
| 1 | 8.368494 | 0.190163  | 0.767400  |
| 1 | 8.167815 | -1.519047 | 0.304831  |
| 6 | 7.754965 | 1.299140  | -1.653505 |
| 1 | 7.743968 | 2.018823  | -0.827418 |
| 1 | 8.751676 | 1.306015  | -2.109126 |
| 1 | 7.025566 | 1.623577  | -2.403990 |

-----  
 ---  
*para-B'*  
 -----  
 ---

Number of imaginary frequencies : 1  
 The smallest frequency is : -1424.9956 cm(-1)

Electronic energy : =-2241.7891359  
 Zero-point correction= 0.496583  
 Thermal correction to Energy= 0.534663  
 Thermal correction to Enthalpy= 0.535607  
 Thermal correction to Gibbs Free Energy= 0.422875  
 Sum of electronic and zero-point Energies= -2241.292553  
 Sum of electronic and thermal Energies= -2241.254473  
 Sum of electronic and thermal Enthalpies= -2241.253529  
 Sum of electronic and thermal Free Energies= -2241.366261

.....  
 Cartesian Coordinates  
 .....

|   |          |           |           |
|---|----------|-----------|-----------|
| 6 | 3.670936 | 2.161311  | -1.154033 |
| 6 | 2.331472 | 2.479951  | -1.310654 |
| 6 | 1.494772 | 2.662282  | -0.192761 |
| 6 | 2.075265 | 2.590506  | 1.087606  |
| 6 | 3.416859 | 2.281028  | 1.252091  |
| 6 | 4.208609 | 2.025172  | 0.128972  |
| 1 | 4.300493 | 1.965144  | -2.020905 |
| 1 | 1.905828 | 2.544952  | -2.310962 |
| 1 | 0.496491 | 3.513163  | -0.322608 |
| 1 | 3.845528 | 2.184564  | 2.247887  |
| 6 | 5.605957 | 1.522476  | 0.293958  |
| 8 | 4.842858 | -0.452218 | 1.955370  |
| 6 | 4.287280 | -2.067431 | -0.373173 |
| 6 | 2.895896 | -2.165293 | -0.254258 |
| 6 | 5.077840 | -3.203300 | -0.370853 |
| 6 | 2.282483 | -3.420347 | -0.152952 |

|    |           |           |           |
|----|-----------|-----------|-----------|
| 6  | 4.463449  | -4.448031 | -0.255831 |
| 1  | 6.155627  | -3.097423 | -0.459479 |
| 6  | 3.078380  | -4.557326 | -0.152130 |
| 1  | 1.196686  | -3.457542 | -0.078994 |
| 1  | 5.078473  | -5.344280 | -0.252818 |
| 1  | 2.615191  | -5.536418 | -0.069684 |
| 6  | 2.075530  | -1.006291 | -0.240834 |
| 7  | 1.317821  | -0.135405 | -0.236369 |
| 46 | -0.153666 | 1.240082  | -0.261167 |
| 6  | -2.788824 | 4.656867  | -0.382760 |
| 6  | -1.546674 | 3.813041  | -0.346190 |
| 8  | -0.434677 | 4.405063  | -0.395381 |
| 8  | -1.711591 | 2.559976  | -0.278495 |
| 1  | 1.449047  | 2.748355  | 1.964629  |
| 1  | -3.674290 | 4.060065  | -0.161753 |
| 1  | -2.689051 | 5.479777  | 0.329612  |
| 1  | -2.884264 | 5.097713  | -1.380097 |
| 6  | -2.990661 | -2.097440 | -0.315292 |
| 6  | -1.613629 | -1.420755 | -0.247357 |
| 8  | -1.683391 | -0.130396 | -0.305261 |
| 8  | -0.622137 | -2.134451 | -0.174193 |
| 1  | -3.048919 | -2.765890 | 0.556319  |
| 7  | -4.060173 | -1.126458 | -0.238028 |
| 1  | -3.806396 | -0.148468 | -0.283071 |
| 6  | -5.309747 | -1.489371 | 0.137362  |
| 8  | -5.662410 | -2.637402 | 0.344302  |
| 8  | 7.029150  | -0.679787 | 0.722138  |
| 8  | 4.846569  | -0.811133 | -0.532748 |
| 16 | 5.659979  | -0.211380 | 0.784207  |
| 1  | 6.158816  | 2.021317  | 1.099742  |
| 1  | 6.200876  | 1.578369  | -0.623962 |
| 6  | -3.072624 | -2.942611 | -1.580967 |
| 1  | -4.026603 | -3.477469 | -1.602764 |
| 1  | -3.009004 | -2.301803 | -2.468747 |
| 1  | -2.251897 | -3.665127 | -1.605468 |
| 8  | -6.090266 | -0.389855 | 0.236957  |
| 6  | -7.483683 | -0.508949 | 0.626242  |
| 6  | -7.598303 | -1.094949 | 2.024607  |
| 1  | -8.643613 | -1.054505 | 2.354795  |
| 1  | -7.259679 | -2.133172 | 2.045715  |
| 1  | -6.995098 | -0.509530 | 2.728845  |
| 6  | -8.255498 | -1.323000 | -0.400211 |
| 1  | -7.924004 | -2.363588 | -0.408913 |
| 1  | -9.325840 | -1.293434 | -0.161740 |
| 1  | -8.116999 | -0.896279 | -1.400811 |
| 6  | -7.958437 | 0.934483  | 0.619098  |
| 1  | -7.839613 | 1.373441  | -0.378026 |
| 1  | -9.016745 | 0.986338  | 0.899813  |
| 1  | -7.378311 | 1.532558  | 1.330984  |

-----  
---  
*para-C'*  
-----  
---

Number of imaginary frequencies : 1  
The smallest frequency is : -1277.6530 cm(-1)

Electronic energy :        =-2012.8012287  
Zero-point correction=        0.432427  
Thermal correction to Energy=        0.464348  
Thermal correction to Enthalpy=        0.465293  
Thermal correction to Gibbs Free Energy=        0.368781  
Sum of electronic and zero-point Energies=        -2012.368802  
Sum of electronic and thermal Energies=        -2012.336880  
Sum of electronic and thermal Enthalpies=        -2012.335936  
Sum of electronic and thermal Free Energies=        -2012.432448

.....  
          Cartesian Coordinates  
.....

|    |           |           |           |
|----|-----------|-----------|-----------|
| 46 | -0.955899 | 0.742962  | -0.107035 |
| 6  | 0.123607  | -1.874869 | -1.024735 |
| 6  | -0.498378 | -1.384836 | 0.137320  |
| 6  | 0.156531  | -1.582393 | 1.365644  |
| 6  | 1.413712  | -2.166054 | 1.421936  |
| 6  | 2.038393  | -2.585645 | 0.245162  |
| 6  | 1.373582  | -2.474936 | -0.978709 |
| 1  | 1.940296  | -2.261656 | 2.371038  |
| 1  | -0.310876 | -1.228124 | 2.283640  |
| 1  | -1.845595 | -1.430500 | 0.082282  |
| 1  | 1.860794  | -2.812816 | -1.891796 |
| 6  | 3.455169  | -3.053721 | 0.291457  |
| 8  | 4.258629  | -1.323236 | -1.614497 |
| 6  | 4.578670  | 0.664444  | 0.470422  |
| 6  | 3.615405  | 1.600245  | 0.067042  |
| 6  | 5.911914  | 1.027232  | 0.583322  |
| 6  | 4.006532  | 2.916017  | -0.213245 |
| 6  | 6.287526  | 2.334363  | 0.291991  |
| 1  | 6.634952  | 0.281465  | 0.901120  |
| 6  | 5.340788  | 3.276338  | -0.103513 |
| 1  | 3.252141  | 3.636940  | -0.516465 |
| 1  | 7.332499  | 2.619703  | 0.379228  |
| 1  | 5.642410  | 4.296051  | -0.324170 |
| 6  | 2.238981  | 1.248396  | -0.036278 |
| 7  | 1.102154  | 1.042225  | -0.112937 |
| 6  | -3.596839 | 1.984797  | -0.065069 |

|    |           |           |           |
|----|-----------|-----------|-----------|
| 6  | -2.561005 | 3.079900  | -0.334231 |
| 8  | -1.304238 | 2.713482  | -0.384206 |
| 8  | -2.920670 | 4.234188  | -0.456230 |
| 1  | -4.338833 | 2.034384  | -0.874585 |
| 7  | -2.946472 | 0.675403  | -0.070317 |
| 6  | -3.627862 | -0.452013 | -0.105144 |
| 8  | -3.087049 | -1.599809 | -0.047832 |
| 1  | -0.377287 | -1.752849 | -1.984838 |
| 8  | 4.169500  | -0.613414 | 0.792934  |
| 8  | 5.961715  | -2.215622 | 0.012918  |
| 1  | 3.664154  | -3.902297 | -0.372232 |
| 1  | 3.799900  | -3.305963 | 1.300043  |
| 16 | 4.607715  | -1.799112 | -0.292088 |
| 6  | -4.278120 | 2.283264  | 1.264075  |
| 1  | -4.704726 | 3.290115  | 1.230365  |
| 1  | -5.072362 | 1.558210  | 1.470721  |
| 1  | -3.543147 | 2.244345  | 2.077942  |
| 8  | -4.948175 | -0.322702 | -0.218952 |
| 6  | -5.874472 | -1.441243 | -0.036144 |
| 6  | -7.226928 | -0.758764 | -0.146258 |
| 1  | -8.028439 | -1.496210 | -0.026966 |
| 1  | -7.338633 | 0.006660  | 0.630277  |
| 1  | -7.338353 | -0.277946 | -1.124120 |
| 6  | -5.701032 | -2.462352 | -1.146022 |
| 1  | -5.779554 | -1.974434 | -2.124331 |
| 1  | -4.736160 | -2.969098 | -1.078257 |
| 1  | -6.498921 | -3.211216 | -1.074102 |
| 6  | -5.693937 | -2.040124 | 1.347643  |
| 1  | -4.731032 | -2.546773 | 1.447058  |
| 1  | -5.764645 | -1.254489 | 2.110237  |
| 1  | -6.491556 | -2.768724 | 1.534652  |

-----  
---  
*para-D'*  
-----  
---

Number of imaginary frequencies : 1  
The smallest frequency is : -1587.6564 cm(-1)

Electronic energy : =-2241.7744668  
Zero-point correction= 0.497566  
Thermal correction to Energy= 0.534643  
Thermal correction to Enthalpy= 0.535587  
Thermal correction to Gibbs Free Energy= 0.428942  
Sum of electronic and zero-point Energies= -2241.276901  
Sum of electronic and thermal Energies= -2241.239824

S287

Sum of electronic and thermal Enthalpies= -2241.238880  
Sum of electronic and thermal Free Energies= -2241.345525

.....  
Cartesian Coordinates  
.....

|    |           |           |           |
|----|-----------|-----------|-----------|
| 46 | 0.803965  | 0.807730  | -0.210172 |
| 6  | -0.021865 | -1.863772 | 0.675440  |
| 6  | 0.561016  | -1.369743 | -0.510241 |
| 6  | -0.200042 | -1.462205 | -1.696485 |
| 6  | -1.484205 | -1.983111 | -1.692308 |
| 6  | -2.037458 | -2.451303 | -0.496063 |
| 6  | -1.296565 | -2.408946 | 0.688817  |
| 1  | 0.551536  | -1.809972 | 1.602063  |
| 8  | 2.822569  | -2.493974 | -0.974142 |
| 1  | -2.075237 | -2.022393 | -2.606662 |
| 1  | 0.246753  | -1.111638 | -2.628187 |
| 1  | 1.792033  | -1.686099 | -0.674469 |
| 1  | -1.738477 | -2.774471 | 1.614084  |
| 6  | -3.440085 | -2.967453 | -0.485982 |
| 8  | -4.151103 | -1.463540 | 1.628216  |
| 6  | -4.726767 | 0.675518  | -0.205327 |
| 6  | -3.732594 | 1.576774  | 0.197882  |
| 6  | -6.066565 | 1.018943  | -0.129994 |
| 6  | -4.094969 | 2.845347  | 0.666299  |
| 6  | -6.415177 | 2.277990  | 0.348604  |
| 1  | -6.813327 | 0.296231  | -0.447038 |
| 6  | -5.436724 | 3.188397  | 0.742188  |
| 1  | -3.316860 | 3.541995  | 0.966102  |
| 1  | -7.465049 | 2.551807  | 0.409645  |
| 1  | -5.720827 | 4.170675  | 1.107930  |
| 6  | -2.360372 | 1.208893  | 0.119683  |
| 7  | -1.235096 | 0.947434  | 0.054177  |
| 6  | 4.555006  | -3.001182 | -2.490745 |
| 6  | 3.572948  | -2.022312 | -1.891367 |
| 8  | 3.563323  | -0.840000 | -2.292176 |
| 6  | 3.040037  | 2.368109  | -1.085462 |
| 6  | 2.010447  | 3.352030  | -0.530796 |
| 8  | 0.929915  | 2.820709  | -0.007878 |
| 8  | 2.178603  | 4.547384  | -0.643535 |
| 1  | 4.035259  | 2.731719  | -0.804699 |
| 1  | 5.373795  | -3.158546 | -1.779217 |
| 1  | 4.078890  | -3.971629 | -2.654936 |
| 1  | 4.970025  | -2.610489 | -3.422288 |
| 7  | 2.844715  | 1.015043  | -0.497693 |
| 1  | 3.120096  | 0.239224  | -1.167897 |
| 6  | 3.440566  | 0.847009  | 0.795433  |
| 8  | 3.780087  | 1.772975  | 1.486898  |
| 16 | -4.600584 | -1.846361 | 0.305703  |
| 8  | -4.337700 | -0.549309 | -0.706346 |



|   |           |           |           |
|---|-----------|-----------|-----------|
| 8 | -5.952256 | -2.318456 | 0.088203  |
| 1 | -3.559016 | -3.890474 | 0.095600  |
| 1 | -3.847183 | -3.135054 | -1.489006 |
| 6 | 2.907065  | 2.286921  | -2.596920 |
| 1 | 3.036242  | 3.289233  | -3.014952 |
| 1 | 3.649442  | 1.607899  | -3.026400 |
| 1 | 1.910870  | 1.920225  | -2.880160 |
| 8 | 3.532256  | -0.448886 | 1.048169  |
| 6 | 3.989219  | -0.932131 | 2.355758  |
| 6 | 3.033081  | -0.442933 | 3.429002  |
| 1 | 3.299177  | -0.901509 | 4.388420  |
| 1 | 3.072846  | 0.643921  | 3.539921  |
| 1 | 2.003435  | -0.737086 | 3.186715  |
| 6 | 5.420208  | -0.488142 | 2.605352  |
| 1 | 5.792669  | -0.975731 | 3.513944  |
| 1 | 6.061722  | -0.792808 | 1.770447  |
| 1 | 5.493926  | 0.594098  | 2.734703  |
| 6 | 3.915286  | -2.438945 | 2.197528  |
| 1 | 4.230635  | -2.923824 | 3.128382  |
| 1 | 2.896252  | -2.760389 | 1.955656  |
| 1 | 4.565477  | -2.773795 | 1.382509  |

-----  
---  
*para-F'*  
-----  
---

Number of imaginary frequencies : 1  
The smallest frequency is : -1059.6758 cm(-1)

Electronic energy : =-2241.7852515  
Zero-point correction= 0.496402  
Thermal correction to Energy= 0.534514  
Thermal correction to Enthalpy= 0.535458  
Thermal correction to Gibbs Free Energy= 0.423439  
Sum of electronic and zero-point Energies= -2241.288850  
Sum of electronic and thermal Energies= -2241.250738  
Sum of electronic and thermal Enthalpies= -2241.249793  
Sum of electronic and thermal Free Energies= -2241.361813

-----  
Cartesian Coordinates  
-----

|   |          |           |           |
|---|----------|-----------|-----------|
| 6 | 1.804596 | -2.250847 | 1.763126  |
| 6 | 0.737425 | -1.366760 | 1.802154  |
| 6 | 0.070044 | -0.983700 | 0.624248  |
| 6 | 0.460564 | -1.591172 | -0.582772 |
| 6 | 1.517670 | -2.487536 | -0.629467 |

|    |            |           |           |
|----|------------|-----------|-----------|
| 6  | 2.221443   | -2.784921 | 0.541197  |
| 1  | 2.353576   | -2.497452 | 2.671236  |
| 1  | 0.447666   | -0.917200 | 2.751026  |
| 1  | -1.258230  | -0.713481 | 0.717859  |
| 1  | 1.846158   | -2.910300 | -1.577052 |
| 6  | 3.471395   | -3.601255 | 0.482460  |
| 8  | 4.414708   | -2.274141 | -1.657212 |
| 6  | 5.461070   | -0.291702 | 0.104695  |
| 6  | 4.633637   | 0.815480  | -0.113737 |
| 6  | 6.808597   | -0.235568 | -0.208596 |
| 6  | 5.159124   | 1.995076  | -0.658417 |
| 6  | 7.325268   | 0.938893  | -0.749527 |
| 1  | 7.430557   | -1.108599 | -0.029982 |
| 6  | 6.509252   | 2.045475  | -0.974891 |
| 1  | 4.477280   | 2.827035  | -0.834128 |
| 1  | 8.381911   | 0.986092  | -1.000050 |
| 1  | 6.927367   | 2.952278  | -1.402462 |
| 6  | 3.249446   | 0.783924  | 0.200611  |
| 7  | 2.123443   | 0.894142  | 0.433484  |
| 46 | 0.127179   | 1.177730  | 0.381067  |
| 8  | -1.888265  | 1.536795  | 0.201742  |
| 6  | -2.745767  | 0.640993  | 0.409085  |
| 8  | -2.496688  | -0.559607 | 0.726795  |
| 6  | -4.193932  | 1.071155  | 0.290547  |
| 1  | -4.310274  | 1.540818  | -0.696694 |
| 6  | -6.293335  | -0.049468 | -0.212260 |
| 8  | -6.767983  | 0.938022  | -0.742175 |
| 7  | -5.060328  | -0.080915 | 0.362103  |
| 8  | 4.903023   | -1.430603 | 0.658431  |
| 16 | 4.822012   | -2.748487 | -0.351126 |
| 8  | 6.037274   | -3.518747 | -0.184769 |
| 1  | 3.863815   | -3.864831 | 1.470449  |
| 1  | 3.371358   | -4.521181 | -0.107870 |
| 1  | -0.054346  | -1.322655 | -1.504725 |
| 1  | -4.687495  | -0.955406 | 0.704252  |
| 6  | -4.513381  | 2.113174  | 1.359659  |
| 1  | -5.549246  | 2.439246  | 1.231149  |
| 1  | -4.402590  | 1.679620  | 2.360320  |
| 1  | -3.848376  | 2.976464  | 1.267741  |
| 8  | -6.878339  | -1.254980 | -0.091583 |
| 6  | -8.218151  | -1.480283 | -0.619295 |
| 6  | -8.482247  | -2.930586 | -0.254143 |
| 1  | -8.442540  | -3.067877 | 0.832204  |
| 1  | -9.474399  | -3.233487 | -0.607593 |
| 1  | -7.733801  | -3.586265 | -0.713010 |
| 6  | -9.217806  | -0.567943 | 0.072285  |
| 1  | -9.146379  | -0.686212 | 1.159997  |
| 1  | -9.041237  | 0.479167  | -0.183381 |
| 1  | -10.234606 | -0.841837 | -0.233929 |

|   |           |           |           |
|---|-----------|-----------|-----------|
| 6 | -8.224232 | -1.302676 | -2.128582 |
| 1 | -7.469976 | -1.951849 | -2.588912 |
| 1 | -9.205902 | -1.587968 | -2.525768 |
| 1 | -8.019418 | -0.266286 | -2.406745 |
| 8 | 0.290251  | 3.209320  | 0.234321  |
| 6 | 1.267600  | 3.810521  | -0.375481 |
| 8 | 2.213167  | 3.296679  | -0.961641 |
| 6 | 1.113074  | 5.319053  | -0.293271 |
| 1 | 1.078590  | 5.635244  | 0.753770  |
| 1 | 1.944999  | 5.807140  | -0.805518 |
| 1 | 0.166032  | 5.619592  | -0.751401 |

-----  
 ---  
 Possibilities of Reductive Elimination Transition States of *meta* product at the M06/6-31G\*\*Level of Theory  
 -----

---  
 Reductive Elimination  
 -----

---  
 conf-4 (5-coordination)  
 -----  
 ---

Number of imaginary frequencies : 1  
 The smallest frequency is : -330.5492 cm(-1)

Electronic energy : =-2698.4547193  
 Zero-point correction= 0.604755  
 Thermal correction to Energy= 0.652277  
 Thermal correction to Enthalpy= 0.653221  
 Thermal correction to Gibbs Free Energy= 0.524259  
 Sum of electronic and zero-point Energies= -2697.849964  
 Sum of electronic and thermal Energies= -2697.802443  
 Sum of electronic and thermal Enthalpies= -2697.801498  
 Sum of electronic and thermal Free Energies= -2697.930460

-----  
 Cartesian Coordinates  
 -----

|    |          |           |          |
|----|----------|-----------|----------|
| 46 | 2.009543 | -0.527276 | 0.111626 |
| 6  | 3.642808 | 3.220344  | 1.000792 |
| 6  | 3.480928 | 1.837279  | 1.111638 |
| 6  | 2.177164 | 1.388089  | 1.131520 |
| 6  | 1.062504 | 2.194131  | 1.216274 |
| 6  | 1.255181 | 3.568338  | 1.077760 |
| 6  | 2.548658 | 4.077457  | 0.960157 |
| 1  | 0.074656 | 1.769272  | 1.348952 |

|    |           |           |           |
|----|-----------|-----------|-----------|
| 1  | 4.334796  | 1.170079  | 1.065948  |
| 1  | 2.700866  | 5.148946  | 0.846388  |
| 6  | 0.059585  | 4.466978  | 1.037381  |
| 1  | 0.331689  | 5.524970  | 0.949242  |
| 1  | -0.607864 | 4.357893  | 1.900583  |
| 8  | -0.292980 | 3.799817  | -1.570516 |
| 6  | -2.616483 | 2.168642  | -0.660846 |
| 6  | -2.197885 | 0.927302  | -1.162823 |
| 6  | -3.861912 | 2.678478  | -0.992657 |
| 6  | -3.054491 | 0.176826  | -1.974083 |
| 6  | -4.691964 | 1.939002  | -1.830626 |
| 1  | -4.163068 | 3.641728  | -0.591749 |
| 6  | -4.294349 | 0.694879  | -2.316354 |
| 1  | -2.731459 | -0.802546 | -2.319658 |
| 1  | -5.666644 | 2.337815  | -2.099546 |
| 1  | -4.956265 | 0.122049  | -2.959821 |
| 6  | -0.892327 | 0.458160  | -0.854941 |
| 7  | 0.185109  | 0.129650  | -0.599002 |
| 6  | -0.954222 | -3.409301 | -0.544364 |
| 6  | 0.428697  | -2.994711 | -0.004028 |
| 8  | 1.278751  | -2.593019 | -0.878111 |
| 8  | 0.567759  | -2.965582 | 1.218573  |
| 1  | -1.213381 | -4.379523 | -0.093135 |
| 7  | -1.868296 | -2.385448 | -0.026364 |
| 6  | -3.213704 | -2.612550 | -0.002324 |
| 8  | -3.771484 | -3.572732 | -0.498263 |
| 1  | 4.650742  | 3.619078  | 0.917912  |
| 8  | -1.786327 | 2.842698  | 0.212805  |
| 8  | -1.992391 | 5.274058  | -0.429821 |
| 16 | -1.019910 | 4.200612  | -0.385523 |
| 8  | 3.620256  | -1.467209 | 0.767086  |
| 6  | 4.839600  | -1.237100 | 0.350925  |
| 8  | 5.211948  | -0.310353 | -0.350944 |
| 8  | 1.783916  | -0.281411 | 2.183999  |
| 6  | 0.565191  | -0.539811 | 2.671215  |
| 8  | -0.490792 | -0.197205 | 2.177082  |
| 6  | 0.678189  | -1.349817 | 3.930895  |
| 1  | 1.571133  | -1.096055 | 4.505704  |
| 1  | -0.227968 | -1.224722 | 4.527364  |
| 1  | 0.759567  | -2.391376 | 3.598089  |
| 6  | 5.770398  | -2.325214 | 0.838767  |
| 1  | 5.684995  | -3.174326 | 0.151868  |
| 1  | 6.797398  | -1.954282 | 0.822197  |
| 1  | 5.493905  | -2.673246 | 1.836086  |
| 6  | -1.037182 | -3.495488 | -2.053392 |
| 1  | -2.061848 | -3.726342 | -2.362161 |
| 1  | -0.712723 | -2.547454 | -2.498642 |
| 1  | -0.372112 | -4.278978 | -2.431117 |
| 8  | -3.820939 | -1.572775 | 0.611626  |

|   |           |           |           |
|---|-----------|-----------|-----------|
| 6 | -5.232253 | -1.628937 | 0.951981  |
| 6 | -5.475630 | -0.262050 | 1.568753  |
| 1 | -6.518276 | -0.171838 | 1.894637  |
| 1 | -4.820451 | -0.108274 | 2.433168  |
| 1 | -5.267543 | 0.527591  | 0.834345  |
| 6 | -5.462046 | -2.733855 | 1.969254  |
| 1 | -6.502195 | -2.710696 | 2.315903  |
| 1 | -5.263934 | -3.716045 | 1.530745  |
| 1 | -4.807048 | -2.591687 | 2.836585  |
| 6 | -6.103074 | -1.810402 | -0.282414 |
| 1 | -7.157613 | -1.716217 | 0.005387  |
| 1 | -5.883512 | -1.027463 | -1.018398 |
| 1 | -5.942359 | -2.786400 | -0.744616 |
| 1 | -1.515346 | -1.804577 | 0.730591  |
| 8 | 2.747522  | -0.213257 | -1.906493 |
| 6 | 3.426943  | -1.057998 | -2.510307 |
| 8 | 3.390456  | -2.337534 | -2.288783 |
| 6 | 4.399616  | -0.617810 | -3.548440 |
| 1 | 5.342527  | -0.417011 | -3.026508 |
| 1 | 4.561151  | -1.396079 | -4.296533 |
| 1 | 4.060493  | 0.312626  | -4.006578 |
| 1 | 2.636384  | -2.570519 | -1.656298 |

-----  
 ---  
 conf-1 (6-coordination)  
 -----  
 ---

Number of imaginary frequencies : 1  
 The smallest frequency is : -323.1206 cm(-1)

Electronic energy :        =-2469.4590197  
 Zero-point correction=            0.540993  
 Thermal correction to Energy=        0.582282  
 Thermal correction to Enthalpy=       0.583227  
 Thermal correction to Gibbs Free Energy=   0.469664  
 Sum of electronic and zero-point Energies=   -2468.918027  
 Sum of electronic and thermal Energies=   -2468.876737  
 Sum of electronic and thermal Enthalpies=   -2468.875793  
 Sum of electronic and thermal Free Energies=   -2468.989356

.....  
 Cartesian Coordinates  
 .....

|    |           |           |           |
|----|-----------|-----------|-----------|
| 46 | -1.702041 | -0.540327 | 0.665392  |
| 6  | -1.515444 | -1.085842 | -3.550776 |
| 6  | -2.143078 | -1.178919 | -2.309662 |
| 6  | -1.346970 | -1.527250 | -1.233849 |

|    |           |           |           |
|----|-----------|-----------|-----------|
| 6  | -0.053925 | -1.996624 | -1.364117 |
| 6  | 0.570716  | -1.834115 | -2.601398 |
| 6  | -0.157703 | -1.363357 | -3.692581 |
| 1  | 0.476238  | -2.431478 | -0.526632 |
| 1  | -1.787934 | 1.387577  | -1.511830 |
| 1  | -3.188895 | -0.923294 | -2.183858 |
| 1  | 0.327791  | -1.235573 | -4.658067 |
| 6  | 2.033054  | -2.130574 | -2.702012 |
| 1  | 2.417517  | -2.023180 | -3.722551 |
| 1  | 2.313048  | -3.124080 | -2.331378 |
| 8  | 2.461206  | 0.295658  | -1.538015 |
| 6  | 3.568757  | -1.145590 | 0.789356  |
| 6  | 2.670143  | -0.703119 | 1.770784  |
| 6  | 4.928424  | -0.944831 | 0.949940  |
| 6  | 3.118217  | -0.048634 | 2.922786  |
| 6  | 5.374293  | -0.296583 | 2.101264  |
| 1  | 5.614745  | -1.294249 | 0.184155  |
| 6  | 4.484081  | 0.148853  | 3.076804  |
| 1  | 2.373106  | 0.303767  | 3.640098  |
| 1  | 6.441417  | -0.137660 | 2.235086  |
| 1  | 4.857848  | 0.655014  | 3.962113  |
| 6  | 1.288046  | -0.889703 | 1.536448  |
| 7  | 0.174947  | -1.047842 | 1.271829  |
| 6  | -0.459036 | 1.883351  | 2.029472  |
| 6  | -0.707422 | 0.801951  | 3.123693  |
| 8  | -1.741452 | 0.092500  | 2.949871  |
| 8  | 0.119399  | 0.772955  | 4.040992  |
| 1  | 0.621580  | 2.079944  | 2.017121  |
| 7  | -0.885504 | 1.417505  | 0.715210  |
| 6  | -0.394004 | 1.947718  | -0.366660 |
| 8  | -0.794137 | 1.609823  | -1.560005 |
| 1  | -2.098761 | -0.766530 | -4.410913 |
| 8  | 3.051152  | -1.817159 | -0.306152 |
| 8  | 4.436784  | -1.082801 | -2.279147 |
| 16 | 3.087016  | -0.993210 | -1.758513 |
| 8  | -3.590925 | 0.078160  | 0.389994  |
| 6  | -3.974941 | 0.976201  | -0.444829 |
| 8  | -3.304784 | 1.488345  | -1.352723 |
| 8  | -2.485113 | -2.438664 | 0.156201  |
| 6  | -1.952717 | -3.555101 | 0.662150  |
| 8  | -0.782895 | -3.732354 | 0.917973  |
| 6  | -3.028293 | -4.593133 | 0.862053  |
| 1  | -3.570654 | -4.763102 | -0.072513 |
| 1  | -2.576720 | -5.521932 | 1.215247  |
| 1  | -3.751734 | -4.226804 | 1.596896  |
| 6  | -5.408402 | 1.391976  | -0.234603 |
| 1  | -5.442991 | 2.099651  | 0.600356  |
| 1  | -5.789924 | 1.880440  | -1.133188 |
| 1  | -6.025393 | 0.532995  | 0.038192  |

|   |           |          |           |
|---|-----------|----------|-----------|
| 6 | -1.222266 | 3.140619 | 2.415509  |
| 1 | -1.029442 | 3.955053 | 1.705170  |
| 1 | -2.297335 | 2.924679 | 2.430694  |
| 1 | -0.916015 | 3.464051 | 3.416065  |
| 8 | 0.546708  | 2.861878 | -0.257476 |
| 6 | 0.799257  | 3.885449 | -1.288536 |
| 6 | 1.768642  | 4.810584 | -0.576296 |
| 1 | 2.037718  | 5.646676 | -1.231108 |
| 1 | 1.316533  | 5.211710 | 0.338211  |
| 1 | 2.682550  | 4.271723 | -0.304752 |
| 6 | -0.495900 | 4.611593 | -1.607052 |
| 1 | -0.279204 | 5.456895 | -2.270421 |
| 1 | -1.220979 | 3.963525 | -2.107122 |
| 1 | -0.948050 | 5.009634 | -0.690108 |
| 6 | 1.447011  | 3.261113 | -2.509660 |
| 1 | 1.762321  | 4.061358 | -3.190449 |
| 1 | 2.328858  | 2.680681 | -2.218743 |
| 1 | 0.757508  | 2.598353 | -3.038373 |

---

**(IV) Hydrolysis of Trifluoroacetoxy and Acetoxy Products**

---

---  
**(R=CF<sub>3</sub>) Trifluoro Acetoxylation leads to hydrolysis [8b-9]**  
 -----

---  
**[8b]**  
 -----

Number of imaginary frequencies : 0

Electronic energy :       =-1820.3378601  
 Zero-point correction=           0.280400  
 Thermal correction to Energy=       0.305204  
 Thermal correction to Enthalpy=       0.306148  
 Thermal correction to Gibbs Free Energy=   0.225382  
 Sum of electronic and zero-point Energies=   -1820.057460  
 Sum of electronic and thermal Energies=   -1820.032656  
 Sum of electronic and thermal Enthalpies=   -1820.031712  
 Sum of electronic and thermal Free Energies=   -1820.112478

.....  
 Cartesian Coordinates  
 .....

|   |          |           |           |
|---|----------|-----------|-----------|
| 6 | 0.694967 | -2.975250 | 1.961293  |
| 6 | 1.671633 | -1.993539 | 1.831662  |
| 6 | 1.615489 | -1.180718 | 0.717167  |
| 6 | 0.647536 | -1.276054 | -0.264136 |

|    |           |           |           |
|----|-----------|-----------|-----------|
| 6  | -0.327106 | -2.260439 | -0.112165 |
| 6  | -0.298819 | -3.104681 | 0.999652  |
| 1  | 0.646194  | -0.603769 | -1.119591 |
| 1  | 2.454557  | -1.855123 | 2.571656  |
| 1  | -1.067608 | -3.866851 | 1.111222  |
| 6  | -1.426856 | -2.376785 | -1.115379 |
| 1  | -1.766074 | -3.410818 | -1.256465 |
| 1  | -1.176000 | -1.959850 | -2.097650 |
| 8  | -3.207015 | -1.731271 | 0.800952  |
| 6  | -3.013227 | 1.068376  | -0.190431 |
| 6  | -2.214354 | 2.136922  | 0.240388  |
| 6  | -4.391469 | 1.120082  | -0.058135 |
| 6  | -2.815235 | 3.261470  | 0.818704  |
| 6  | -4.969920 | 2.236889  | 0.535703  |
| 1  | -5.015119 | 0.308643  | -0.422975 |
| 6  | -4.191141 | 3.304238  | 0.973415  |
| 1  | -2.187628 | 4.088295  | 1.139450  |
| 1  | -6.050443 | 2.273083  | 0.644227  |
| 1  | -4.658127 | 4.172878  | 1.427876  |
| 6  | -0.802777 | 2.097235  | 0.059413  |
| 7  | 0.348655  | 2.088895  | -0.094768 |
| 1  | 0.708866  | -3.635384 | 2.823637  |
| 8  | -2.346904 | 0.016271  | -0.795634 |
| 8  | -3.960038 | -1.742350 | -1.593233 |
| 16 | -2.916748 | -1.524193 | -0.606308 |
| 8  | 2.569181  | -0.125371 | 0.656420  |
| 6  | 3.460763  | -0.073235 | -0.258682 |
| 8  | 3.713881  | -1.100328 | -0.974862 |
| 6  | 4.518209  | 1.008746  | 0.000470  |
| 8  | 2.435200  | 1.053345  | -1.665636 |
| 1  | 1.825151  | 1.655734  | -1.186160 |
| 1  | 2.919219  | 1.597198  | -2.304728 |
| 9  | 3.961893  | 2.125436  | 0.418070  |
| 9  | 5.222322  | 1.231012  | -1.097473 |
| 9  | 5.323059  | 0.538479  | 0.944490  |
| 1  | 4.448326  | -0.975437 | -1.609651 |

-----  
 ---  
**[8b-8c]<sup>‡</sup>**  
 -----  
 ---

Number of imaginary frequencies : 1  
 The smallest frequency is : -60.6468 cm(-1)

Electronic energy :       =-1820.3378569  
 Zero-point correction=                   0.279861

S296



|                                              |              |
|----------------------------------------------|--------------|
| Thermal correction to Energy=                | 0.303966     |
| Thermal correction to Enthalpy=              | 0.304910     |
| Thermal correction to Gibbs Free Energy=     | 0.226069     |
| Sum of electronic and zero-point Energies=   | -1820.057996 |
| Sum of electronic and thermal Energies=      | -1820.033891 |
| Sum of electronic and thermal Enthalpies=    | -1820.032947 |
| Sum of electronic and thermal Free Energies= | -1820.111787 |

.....  
 Cartesian Coordinates  
 .....

|    |           |           |           |
|----|-----------|-----------|-----------|
| 6  | 0.704281  | -2.994062 | 1.940120  |
| 6  | 1.675969  | -2.006994 | 1.813301  |
| 6  | 1.610748  | -1.184317 | 0.706299  |
| 6  | 0.638162  | -1.277416 | -0.270730 |
| 6  | -0.331672 | -2.267017 | -0.121834 |
| 6  | -0.294348 | -3.119915 | 0.983026  |
| 1  | 0.629353  | -0.598311 | -1.120618 |
| 1  | 2.461874  | -1.871281 | 2.550648  |
| 1  | -1.059963 | -3.885662 | 1.092586  |
| 6  | -1.437731 | -2.378270 | -1.118617 |
| 1  | -1.780134 | -3.411094 | -1.260619 |
| 1  | -1.192936 | -1.958576 | -2.101274 |
| 8  | -3.199279 | -1.728993 | 0.813929  |
| 6  | -3.009622 | 1.071811  | -0.186572 |
| 6  | -2.205405 | 2.143907  | 0.225394  |
| 6  | -4.386036 | 1.124678  | -0.036561 |
| 6  | -2.798689 | 3.273344  | 0.801959  |
| 6  | -4.956688 | 2.246460  | 0.555498  |
| 1  | -5.014557 | 0.310484  | -0.386478 |
| 6  | -4.172467 | 3.317503  | 0.973980  |
| 1  | -2.167075 | 4.102699  | 1.107976  |
| 1  | -6.035697 | 2.283396  | 0.678129  |
| 1  | -4.633619 | 4.189857  | 1.427271  |
| 6  | -0.796224 | 2.102270  | 0.027448  |
| 7  | 0.353132  | 2.092359  | -0.140484 |
| 1  | 0.725654  | -3.661349 | 2.796795  |
| 8  | -2.350310 | 0.015784  | -0.791984 |
| 8  | -3.974944 | -1.739733 | -1.572962 |
| 16 | -2.921832 | -1.523401 | -0.596113 |
| 8  | 2.556413  | -0.123025 | 0.649850  |
| 6  | 3.450726  | -0.064295 | -0.265773 |
| 8  | 3.721007  | -1.099882 | -0.967107 |
| 6  | 4.508207  | 1.013111  | 0.011435  |
| 8  | 2.450148  | 1.029947  | -1.658503 |
| 1  | 1.837235  | 1.641857  | -1.192232 |
| 1  | 2.943840  | 1.558635  | -2.303592 |
| 9  | 3.948927  | 2.129490  | 0.427626  |
| 9  | 5.225697  | 1.240675  | -1.077164 |
| 9  | 5.301369  | 0.537014  | 0.962067  |

1 4.459944 -0.974942 -1.596165

-----  
---  
[8c]  
-----  
---

Number of imaginary frequencies : 0

Electronic energy : =-1820.3446165  
Zero-point correction= 0.279072  
Thermal correction to Energy= 0.302590  
Thermal correction to Enthalpy= 0.303534  
Thermal correction to Gibbs Free Energy= 0.225693  
Sum of electronic and zero-point Energies= -1820.065545  
Sum of electronic and thermal Energies= -1820.042027  
Sum of electronic and thermal Enthalpies= -1820.041083  
Sum of electronic and thermal Free Energies= -1820.118924

.....  
Cartesian Coordinates  
.....

|   |           |           |           |
|---|-----------|-----------|-----------|
| 6 | 0.654908  | -3.036982 | 1.902165  |
| 6 | 1.614025  | -2.041424 | 1.755762  |
| 6 | 1.540831  | -1.195856 | 0.659881  |
| 6 | 0.546334  | -1.323546 | -0.298378 |
| 6 | -0.418341 | -2.316362 | -0.133992 |
| 6 | -0.364052 | -3.170817 | 0.967408  |
| 1 | 0.501850  | -0.665050 | -1.162432 |
| 1 | 2.410857  | -1.903806 | 2.481571  |
| 1 | -1.127175 | -3.937180 | 1.090485  |
| 6 | -1.550540 | -2.411992 | -1.103235 |
| 1 | -1.939300 | -3.432753 | -1.209132 |
| 1 | -1.318473 | -2.027107 | -2.103184 |
| 8 | -3.244550 | -1.649540 | 0.851541  |
| 6 | -2.904604 | 1.127480  | -0.174858 |
| 6 | -2.020170 | 2.187307  | 0.092697  |
| 6 | -4.246521 | 1.250936  | 0.142941  |
| 6 | -2.484269 | 3.368781  | 0.688204  |
| 6 | -4.689496 | 2.422327  | 0.749942  |
| 1 | -4.950214 | 0.456165  | -0.085541 |
| 6 | -3.821669 | 3.476927  | 1.023868  |
| 1 | -1.784205 | 4.177210  | 0.877404  |
| 1 | -5.742572 | 2.510933  | 1.002743  |
| 1 | -4.192311 | 4.383765  | 1.491343  |
| 6 | -0.659976 | 2.058166  | -0.267731 |
| 7 | 0.449298  | 1.955818  | -0.575358 |
| 1 | 0.700385  | -3.705872 | 2.757114  |

|    |           |           |           |
|----|-----------|-----------|-----------|
| 8  | -2.352238 | 0.033697  | -0.801698 |
| 8  | -4.071081 | -1.655563 | -1.519539 |
| 16 | -2.989007 | -1.484913 | -0.567058 |
| 8  | 2.451768  | -0.135691 | 0.638185  |
| 6  | 3.249683  | 0.073283  | -0.438305 |
| 8  | 3.654171  | -1.079480 | -1.003595 |
| 6  | 4.417839  | 0.956964  | 0.048832  |
| 8  | 2.476307  | 0.863599  | -1.393748 |
| 1  | 1.568822  | 1.511174  | -0.975949 |
| 1  | 2.982316  | 1.245136  | -2.135929 |
| 9  | 3.968993  | 2.082481  | 0.587018  |
| 9  | 5.202048  | 1.262675  | -0.987341 |
| 9  | 5.135507  | 0.301543  | 0.946500  |
| 1  | 4.311199  | -0.932354 | -1.704014 |

-----  
 ---  
**[8d]**  
 -----  
 ---

Number of imaginary frequencies : 0

Electronic energy :        =-1896.7730984  
 Zero-point correction=        0.309765  
 Thermal correction to Energy=        0.335635  
 Thermal correction to Enthalpy=        0.336580  
 Thermal correction to Gibbs Free Energy=        0.254258  
 Sum of electronic and zero-point Energies=        -1896.463334  
 Sum of electronic and thermal Energies=        -1896.437463  
 Sum of electronic and thermal Enthalpies=        -1896.436519  
 Sum of electronic and thermal Free Energies=        -1896.518840

.....  
 Cartesian Coordinates  
 .....

|   |           |          |           |
|---|-----------|----------|-----------|
| 6 | -1.365332 | 2.866722 | 1.591998  |
| 6 | -2.010995 | 1.640882 | 1.490173  |
| 6 | -1.545840 | 0.707683 | 0.572713  |
| 6 | -0.467070 | 0.975651 | -0.255488 |
| 6 | 0.171754  | 2.210746 | -0.148715 |
| 6 | -0.271442 | 3.149567 | 0.782134  |
| 1 | -0.114850 | 0.236931 | -0.968483 |
| 1 | -2.871309 | 1.397104 | 2.110322  |
| 1 | 0.242582  | 4.104838 | 0.868321  |
| 6 | 1.372099  | 2.505229 | -0.988765 |
| 1 | 1.602242  | 3.577255 | -1.028900 |
| 1 | 1.304570  | 2.129734 | -2.016627 |
| 8 | 2.884820  | 1.781828 | 1.125607  |

|    |           |           |           |
|----|-----------|-----------|-----------|
| 6  | 3.316245  | -0.809223 | -0.268673 |
| 6  | 2.640947  | -2.036322 | -0.191237 |
| 6  | 4.629573  | -0.701968 | 0.160789  |
| 6  | 3.294255  | -3.156982 | 0.336424  |
| 6  | 5.257996  | -1.821749 | 0.695664  |
| 1  | 5.167621  | 0.237604  | 0.071626  |
| 6  | 4.598865  | -3.044510 | 0.787110  |
| 1  | 2.762110  | -4.102855 | 0.384531  |
| 1  | 6.286075  | -1.733241 | 1.036451  |
| 1  | 5.105471  | -3.910582 | 1.202242  |
| 6  | 1.304409  | -2.155457 | -0.666488 |
| 7  | 0.216741  | -2.275551 | -1.057132 |
| 1  | -1.718264 | 3.603254  | 2.308743  |
| 8  | 2.613390  | 0.234013  | -0.842447 |
| 8  | 4.024361  | 2.302034  | -1.050546 |
| 16 | 2.875730  | 1.786374  | -0.326341 |
| 8  | -2.146871 | -0.553569 | 0.579963  |
| 6  | -2.929288 | -1.028002 | -0.539013 |
| 8  | -2.247281 | -0.964741 | -1.704132 |
| 6  | -4.185540 | -0.147952 | -0.681975 |
| 8  | -3.369660 | -2.266735 | -0.163477 |
| 1  | -2.635136 | -2.899439 | -0.219664 |
| 1  | -3.910214 | -2.020254 | 2.554796  |
| 9  | -4.833184 | -0.076419 | 0.481762  |
| 9  | -5.006075 | -0.660489 | -1.590456 |
| 9  | -3.861539 | 1.086398  | -1.054438 |
| 1  | -2.701785 | -1.107966 | 1.960273  |
| 8  | -3.203504 | -1.391229 | 2.802444  |
| 1  | -1.448215 | -1.535143 | -1.641333 |
| 1  | -2.598432 | -1.834465 | 3.428079  |

-----  
---  
**[8d-9]<sup>‡</sup>**  
-----  
---

Number of imaginary frequencies : 1  
The smallest frequency is : -213.1534 cm(-1)

Electronic energy :        =-1896.7627334  
Zero-point correction=                0.306843  
Thermal correction to Energy=        0.332800  
Thermal correction to Enthalpy=       0.333744  
Thermal correction to Gibbs Free Energy=   0.250645  
Sum of electronic and zero-point Energies=   -1896.455890  
Sum of electronic and thermal Energies=   -1896.429933  
Sum of electronic and thermal Enthalpies=   -1896.428989

S300

Sum of electronic and thermal Free Energies= -1896.512088

.....  
Cartesian Coordinates  
.....

|    |           |           |           |
|----|-----------|-----------|-----------|
| 6  | -1.379305 | 3.114368  | 1.371374  |
| 6  | -2.014036 | 1.880057  | 1.427009  |
| 6  | -1.510032 | 0.837263  | 0.658232  |
| 6  | -0.425996 | 1.008098  | -0.188493 |
| 6  | 0.196853  | 2.254037  | -0.241447 |
| 6  | -0.272015 | 3.301445  | 0.550791  |
| 1  | -0.065087 | 0.179531  | -0.790836 |
| 1  | -2.882398 | 1.717559  | 2.061468  |
| 1  | 0.229156  | 4.266457  | 0.516321  |
| 6  | 1.401380  | 2.454472  | -1.103523 |
| 1  | 1.655678  | 3.514547  | -1.225007 |
| 1  | 1.320089  | 2.006308  | -2.100993 |
| 8  | 2.890807  | 1.819865  | 1.055045  |
| 6  | 3.300255  | -0.849294 | -0.218379 |
| 6  | 2.620514  | -2.073655 | -0.122905 |
| 6  | 4.602755  | -0.734834 | 0.240324  |
| 6  | 3.256287  | -3.182028 | 0.450632  |
| 6  | 5.213642  | -1.841737 | 0.820590  |
| 1  | 5.147348  | 0.199668  | 0.140313  |
| 6  | 4.549603  | -3.060478 | 0.929370  |
| 1  | 2.718906  | -4.124162 | 0.512260  |
| 1  | 6.233115  | -1.746128 | 1.184529  |
| 1  | 5.043513  | -3.915486 | 1.380917  |
| 6  | 1.294515  | -2.199525 | -0.620564 |
| 7  | 0.213434  | -2.319688 | -1.026404 |
| 1  | -1.752155 | 3.936730  | 1.975937  |
| 8  | 2.611759  | 0.176817  | -0.835552 |
| 8  | 4.051655  | 2.211669  | -1.137461 |
| 16 | 2.891536  | 1.751091  | -0.394920 |
| 8  | -2.076784 | -0.425628 | 0.748500  |
| 6  | -2.984844 | -1.253450 | -0.599062 |
| 8  | -2.174490 | -1.186255 | -1.598866 |
| 6  | -4.182263 | -0.305098 | -0.734346 |
| 8  | -3.299711 | -2.358872 | 0.018842  |
| 1  | -2.607027 | -3.042456 | -0.050176 |
| 1  | -4.025945 | -1.576879 | 2.695350  |
| 9  | -4.816303 | -0.172743 | 0.420903  |
| 9  | -5.016610 | -0.822792 | -1.627337 |
| 9  | -3.781383 | 0.883132  | -1.152896 |
| 1  | -2.582424 | -0.579487 | 1.634640  |
| 8  | -3.428271 | -0.836070 | 2.871207  |
| 1  | -1.378508 | -1.788996 | -1.508149 |
| 1  | -2.887801 | -1.125273 | 3.619605  |

-----  
---  
[9]  
-----  
---

Number of imaginary frequencies : 0

Electronic energy :       =-1896.767337  
Zero-point correction=               0.305191  
Thermal correction to Energy=       0.331822  
Thermal correction to Enthalpy=     0.332766  
Thermal correction to Gibbs Free Energy=   0.248316  
Sum of electronic and zero-point Energies=   -1896.462146  
Sum of electronic and thermal Energies=   -1896.435515  
Sum of electronic and thermal Enthalpies=   -1896.434571  
Sum of electronic and thermal Free Energies=   -1896.519021

.....  
                  Cartesian Coordinates  
.....

|    |           |           |           |
|----|-----------|-----------|-----------|
| 6  | -0.683924 | 3.302797  | 1.655329  |
| 6  | -1.549825 | 2.220808  | 1.760668  |
| 6  | -1.443120 | 1.160786  | 0.859105  |
| 6  | -0.486820 | 1.200547  | -0.154629 |
| 6  | 0.379564  | 2.285896  | -0.247061 |
| 6  | 0.288249  | 3.340577  | 0.662450  |
| 1  | -0.419629 | 0.381566  | -0.867345 |
| 1  | -2.312956 | 2.186829  | 2.536343  |
| 1  | 0.975953  | 4.180660  | 0.588325  |
| 6  | 1.441538  | 2.300249  | -1.297926 |
| 1  | 1.739635  | 3.316232  | -1.587022 |
| 1  | 1.179708  | 1.747615  | -2.208372 |
| 8  | 3.276025  | 1.900375  | 0.643869  |
| 6  | 3.199430  | -0.989693 | -0.131454 |
| 6  | 2.470465  | -2.146609 | 0.197257  |
| 6  | 4.548601  | -0.913463 | 0.174466  |
| 6  | 3.096897  | -3.221526 | 0.843666  |
| 6  | 5.152618  | -1.983499 | 0.826926  |
| 1  | 5.137208  | -0.041536 | -0.095646 |
| 6  | 4.438999  | -3.131385 | 1.164388  |
| 1  | 2.515502  | -4.107525 | 1.082305  |
| 1  | 6.210292  | -1.916500 | 1.067091  |
| 1  | 4.933408  | -3.955050 | 1.669786  |
| 6  | 1.104084  | -2.230199 | -0.157180 |
| 7  | -0.009742 | -2.312365 | -0.456381 |
| 1  | -0.769096 | 4.124791  | 2.362059  |
| 8  | 2.492989  | -0.014856 | -0.794848 |
| 8  | 4.007803  | 1.745692  | -1.753162 |
| 16 | 2.982365  | 1.574552  | -0.739211 |

|   |           |           |           |
|---|-----------|-----------|-----------|
| 8 | -2.235325 | 0.067478  | 0.943432  |
| 6 | -3.179981 | -1.493197 | -0.636978 |
| 8 | -2.174949 | -1.621855 | -1.347209 |
| 6 | -4.203937 | -0.427260 | -1.050610 |
| 8 | -3.552466 | -2.234364 | 0.344080  |
| 1 | -2.905499 | -2.939766 | 0.551437  |
| 1 | -4.638098 | -0.683493 | 2.723854  |
| 1 | -2.837021 | 0.107052  | 1.734280  |
| 8 | -3.998099 | 0.004941  | 2.948053  |
| 1 | -1.201935 | -2.095926 | -0.909569 |
| 1 | -3.591779 | -0.306048 | 3.767455  |
| 9 | -4.960761 | -0.065357 | -0.029914 |
| 9 | -4.976722 | -0.945512 | -2.000154 |
| 9 | -3.576982 | 0.629377  | -1.534062 |

-----  
 ---  
**(R=CH<sub>3</sub>) Acetoxy product leads to Hydrolysis**  
 -----  
 ---

**[8b']**  
 -----  
 ---

Number of imaginary frequencies : 0

Electronic energy :        =-1522.720254  
 Zero-point correction=                0.301693  
 Thermal correction to Energy=        0.325180  
 Thermal correction to Enthalpy=       0.326125  
 Thermal correction to Gibbs Free Energy=   0.249230  
 Sum of electronic and zero-point Energies=   -1522.418561  
 Sum of electronic and thermal Energies=   -1522.395074  
 Sum of electronic and thermal Enthalpies=   -1522.394129  
 Sum of electronic and thermal Free Energies=   -1522.471024

.....  
 Cartesian Coordinates  
 .....

|   |           |           |           |
|---|-----------|-----------|-----------|
| 6 | 1.903819  | -2.544304 | 1.887894  |
| 6 | 2.612203  | -1.350509 | 1.804320  |
| 6 | 2.338701  | -0.514604 | 0.735932  |
| 6 | 1.405450  | -0.798536 | -0.244217 |
| 6 | 0.696792  | -1.994109 | -0.137274 |
| 6 | 0.947223  | -2.858598 | 0.929481  |
| 1 | 1.239063  | -0.108737 | -1.067820 |
| 1 | 3.353012  | -1.064112 | 2.545453  |
| 1 | 0.384974  | -3.787259 | 1.005440  |
| 6 | -0.364543 | -2.319217 | -1.136613 |
| 1 | -0.500532 | -3.399596 | -1.273698 |

S303

|    |           |           |           |
|----|-----------|-----------|-----------|
| 1  | -0.201958 | -1.865702 | -2.121138 |
| 8  | -2.215490 | -2.027705 | 0.792965  |
| 6  | -2.558599 | 0.760522  | -0.165652 |
| 6  | -1.973788 | 1.985259  | 0.185160  |
| 6  | -3.901134 | 0.523450  | 0.084368  |
| 6  | -2.748405 | 2.967119  | 0.814648  |
| 6  | -4.651580 | 1.504824  | 0.723965  |
| 1  | -4.369618 | -0.408087 | -0.220301 |
| 6  | -4.082618 | 2.719837  | 1.093478  |
| 1  | -2.285456 | 3.914506  | 1.076751  |
| 1  | -5.701811 | 1.312746  | 0.926433  |
| 1  | -4.681671 | 3.477890  | 1.589010  |
| 6  | -0.610712 | 2.251966  | -0.130804 |
| 7  | 0.492657  | 2.499879  | -0.398259 |
| 1  | 2.094935  | -3.226332 | 2.711159  |
| 8  | -1.729669 | -0.144229 | -0.807920 |
| 8  | -2.976839 | -2.179037 | -1.594284 |
| 16 | -1.985929 | -1.766053 | -0.616293 |
| 8  | 2.989720  | 0.744117  | 0.699717  |
| 6  | 4.066357  | 0.930935  | 0.015402  |
| 8  | 4.686776  | -0.007378 | -0.592143 |
| 6  | 4.699520  | 2.247673  | 0.114459  |
| 8  | 2.773645  | 1.581183  | -1.961954 |
| 1  | 2.067859  | 2.118397  | -1.561858 |
| 1  | 3.203810  | 2.168020  | -2.595629 |
| 1  | 5.298139  | 2.447246  | -0.775229 |
| 1  | 5.364000  | 2.228301  | 0.988070  |
| 1  | 3.940305  | 3.016139  | 0.268700  |
| 1  | 4.223982  | -0.871591 | -0.585160 |

-----  
---  
**[8b'-8c']<sup>‡</sup>**  
-----  
---

Number of imaginary frequencies : 1

The smallest frequency is : -253.9562 cm(-1)

Electronic energy : =-1522.7142822

Zero-point correction= 0.303705

Thermal correction to Energy= 0.325321

Thermal correction to Enthalpy= 0.326265

Thermal correction to Gibbs Free Energy= 0.253232

Sum of electronic and zero-point Energies= -1522.410577

Sum of electronic and thermal Energies= -1522.388962

Sum of electronic and thermal Enthalpies= -1522.388017

Sum of electronic and thermal Free Energies= -1522.461050



.....  
Cartesian Coordinates  
.....

|    |           |           |           |
|----|-----------|-----------|-----------|
| 6  | 2.212657  | -2.728547 | 1.575201  |
| 6  | 2.806839  | -1.471786 | 1.550983  |
| 6  | 2.334738  | -0.534807 | 0.644148  |
| 6  | 1.308789  | -0.811266 | -0.245190 |
| 6  | 0.717975  | -2.073467 | -0.207466 |
| 6  | 1.165732  | -3.024573 | 0.709748  |
| 1  | 0.958122  | -0.058563 | -0.946734 |
| 1  | 3.616511  | -1.205608 | 2.225332  |
| 1  | 0.691212  | -4.003310 | 0.740722  |
| 6  | -0.425087 | -2.383212 | -1.118082 |
| 1  | -0.585392 | -3.461812 | -1.241890 |
| 1  | -0.334586 | -1.934895 | -2.114145 |
| 8  | -2.100261 | -1.985222 | 0.952867  |
| 6  | -2.576972 | 0.743489  | -0.166903 |
| 6  | -1.989786 | 1.994400  | 0.074008  |
| 6  | -3.903299 | 0.514612  | 0.164067  |
| 6  | -2.745030 | 3.013892  | 0.667022  |
| 6  | -4.633386 | 1.533457  | 0.767542  |
| 1  | -4.375284 | -0.439869 | -0.051638 |
| 6  | -4.062956 | 2.777285  | 1.020998  |
| 1  | -2.280097 | 3.980367  | 0.841203  |
| 1  | -5.671038 | 1.347868  | 1.031394  |
| 1  | -4.647791 | 3.564065  | 1.487680  |
| 6  | -0.640277 | 2.241498  | -0.305052 |
| 7  | 0.454551  | 2.464161  | -0.621595 |
| 1  | 2.564353  | -3.476332 | 2.280409  |
| 8  | -1.772791 | -0.193560 | -0.790137 |
| 8  | -3.069201 | -2.272919 | -1.346160 |
| 16 | -1.997928 | -1.805643 | -0.484015 |
| 8  | 2.862477  | 0.763507  | 0.708369  |
| 6  | 3.843119  | 1.150578  | -0.107792 |
| 8  | 4.689445  | 0.270429  | -0.593618 |
| 6  | 4.444978  | 2.447091  | 0.289230  |
| 8  | 2.902704  | 1.560148  | -1.557076 |
| 1  | 2.105352  | 2.089269  | -1.289316 |
| 1  | 3.427579  | 2.097388  | -2.176152 |
| 1  | 5.095132  | 2.822190  | -0.503844 |
| 1  | 5.041817  | 2.276179  | 1.191041  |
| 1  | 3.656946  | 3.169541  | 0.513773  |
| 1  | 4.274967  | -0.596231 | -0.761161 |

-----  
---  
[8c']

-----  
---  
Number of imaginary frequencies : 0

Electronic energy :        =-1522.7163264  
Zero-point correction=            0.302859  
Thermal correction to Energy=        0.324274  
Thermal correction to Enthalpy=        0.325218  
Thermal correction to Gibbs Free Energy=    0.253495  
Sum of electronic and zero-point Energies=   -1522.413468  
Sum of electronic and thermal Energies=   -1522.392053  
Sum of electronic and thermal Enthalpies=   -1522.391108  
Sum of electronic and thermal Free Energies=   -1522.462832

-----  
                  Cartesian Coordinates  
-----

|    |           |           |           |
|----|-----------|-----------|-----------|
| 6  | 1.575871  | -1.216472 | 2.607270  |
| 6  | 2.641090  | -0.617622 | 1.945465  |
| 6  | 2.738403  | -0.726920 | 0.560666  |
| 6  | 1.791662  | -1.437910 | -0.166257 |
| 6  | 0.713301  | -2.019094 | 0.501638  |
| 6  | 0.605096  | -1.903438 | 1.888080  |
| 1  | 1.897610  | -1.542542 | -1.244542 |
| 1  | 3.411522  | -0.072969 | 2.486889  |
| 1  | -0.239863 | -2.360418 | 2.399474  |
| 6  | -0.357257 | -2.711456 | -0.277733 |
| 1  | -0.965592 | -3.395520 | 0.324768  |
| 1  | 0.022118  | -3.258191 | -1.150419 |
| 8  | -2.647545 | -2.250938 | -1.585974 |
| 6  | -2.796776 | 0.264662  | 0.347020  |
| 6  | -2.160416 | 1.518164  | 0.399272  |
| 6  | -4.171357 | 0.184073  | 0.257512  |
| 6  | -2.919448 | 2.697503  | 0.380738  |
| 6  | -4.917013 | 1.361071  | 0.235903  |
| 1  | -4.642168 | -0.794220 | 0.216096  |
| 6  | -4.298992 | 2.607959  | 0.302160  |
| 1  | -2.416509 | 3.658887  | 0.424913  |
| 1  | -5.999633 | 1.298781  | 0.170236  |
| 1  | -4.895967 | 3.514514  | 0.290192  |
| 6  | -0.754733 | 1.604476  | 0.436114  |
| 7  | 0.390873  | 1.712971  | 0.462143  |
| 1  | 1.499358  | -1.139990 | 3.688686  |
| 8  | -2.033063 | -0.880276 | 0.441996  |
| 8  | -0.862026 | -0.495281 | -1.736378 |
| 16 | -1.524171 | -1.552931 | -0.988473 |
| 8  | 3.829017  | -0.162893 | -0.069828 |
| 6  | 3.674738  | 1.100484  | -0.695917 |
| 8  | 2.962239  | 1.975118  | 0.171806  |

|   |          |          |           |
|---|----------|----------|-----------|
| 6 | 2.931131 | 1.052753 | -2.002333 |
| 8 | 4.943071 | 1.561650 | -0.919934 |
| 1 | 5.482700 | 1.371056 | -0.136098 |
| 1 | 3.436809 | 0.352908 | -2.672490 |
| 1 | 2.936154 | 2.048998 | -2.453544 |
| 1 | 1.893573 | 0.733121 | -1.868197 |
| 1 | 1.461874 | 1.817730 | 0.377224  |
| 1 | 3.463308 | 2.095512 | 0.996296  |

-----  
---  
**[8d']**  
-----  
---

Number of imaginary frequencies : 0

Electronic energy :        =-1599.1409438  
Zero-point correction=            0.330309  
Thermal correction to Energy=        0.354112  
Thermal correction to Enthalpy=        0.355056  
Thermal correction to Gibbs Free Energy=    0.278267  
Sum of electronic and zero-point Energies=   -1598.810635  
Sum of electronic and thermal Energies=   -1598.786832  
Sum of electronic and thermal Enthalpies=   -1598.785888  
Sum of electronic and thermal Free Energies=  -1598.862677

-----  
                  Cartesian Coordinates  
-----

|   |           |           |           |
|---|-----------|-----------|-----------|
| 6 | -1.196415 | 1.681697  | 2.811756  |
| 6 | -2.250986 | 0.855804  | 2.454002  |
| 6 | -2.516640 | 0.601549  | 1.108041  |
| 6 | -1.736682 | 1.192921  | 0.117933  |
| 6 | -0.657905 | 1.996756  | 0.490812  |
| 6 | -0.382694 | 2.242124  | 1.833925  |
| 1 | -1.940440 | 1.040796  | -0.936949 |
| 1 | -2.883290 | 0.387692  | 3.204319  |
| 1 | 0.468084  | 2.863747  | 2.105456  |
| 6 | 0.248323  | 2.556874  | -0.558250 |
| 1 | 0.844827  | 3.404756  | -0.202157 |
| 1 | -0.271622 | 2.859006  | -1.477050 |
| 8 | 2.503001  | 2.010304  | -1.905899 |
| 6 | 2.901717  | -0.172082 | 0.364671  |
| 6 | 2.370312  | -1.431453 | 0.674462  |
| 6 | 4.256798  | 0.011033  | 0.166939  |
| 6 | 3.237064  | -2.523096 | 0.794592  |
| 6 | 5.105283  | -1.086192 | 0.285363  |
| 1 | 4.632708  | 1.004131  | -0.063500 |

|    |           |           |           |
|----|-----------|-----------|-----------|
| 6  | 4.599515  | -2.343968 | 0.600459  |
| 1  | 2.828791  | -3.499959 | 1.037877  |
| 1  | 6.172787  | -0.952251 | 0.133805  |
| 1  | 5.271297  | -3.191881 | 0.695614  |
| 6  | 0.963743  | -1.602159 | 0.834648  |
| 7  | -0.183548 | -1.752536 | 0.938993  |
| 1  | -0.996629 | 1.874517  | 3.862716  |
| 8  | 2.047712  | 0.927596  | 0.325426  |
| 8  | 0.828466  | 0.173322  | -1.705973 |
| 16 | 1.457635  | 1.365617  | -1.133966 |
| 8  | -3.579715 | -0.234160 | 0.890304  |
| 6  | -3.744125 | -1.037629 | -0.267298 |
| 8  | -2.494840 | -1.525842 | -0.703048 |
| 6  | -4.413398 | -0.311212 | -1.403211 |
| 8  | -4.569769 | -2.064434 | 0.118718  |
| 1  | -4.211717 | -2.459926 | 0.928796  |
| 1  | -0.543498 | -0.321278 | -2.572047 |
| 8  | -1.405709 | -0.739793 | -2.837157 |
| 1  | -1.891646 | -1.764332 | 0.036030  |
| 1  | -5.387706 | 0.046436  | -1.061315 |
| 1  | -4.562512 | -1.002608 | -2.238232 |
| 1  | -3.823337 | 0.542947  | -1.743812 |
| 1  | -1.225295 | -1.458055 | -3.470842 |
| 1  | -1.854752 | -1.117609 | -1.980229 |

-----  
 ---  
**[8d'-9']<sup>‡</sup>**  
 -----  
 ---

Number of imaginary frequencies : 1  
 The smallest frequency is : -360.8280 cm(-1)

Electronic energy : =-1599.1336308  
 Zero-point correction= 0.327424  
 Thermal correction to Energy= 0.351438  
 Thermal correction to Enthalpy= 0.352382  
 Thermal correction to Gibbs Free Energy= 0.274649  
 Sum of electronic and zero-point Energies= -1598.806207  
 Sum of electronic and thermal Energies= -1598.782193  
 Sum of electronic and thermal Enthalpies= -1598.781249  
 Sum of electronic and thermal Free Energies= -1598.858981

-----  
 Cartesian Coordinates  
 -----

|   |           |          |          |
|---|-----------|----------|----------|
| 6 | -1.990340 | 2.920041 | 1.347125 |
| 6 | -2.614770 | 1.680189 | 1.275023 |

|    |           |           |           |
|----|-----------|-----------|-----------|
| 6  | -2.086011 | 0.714549  | 0.426531  |
| 6  | -0.980078 | 0.969009  | -0.369455 |
| 6  | -0.365614 | 2.217170  | -0.292020 |
| 6  | -0.864481 | 3.187144  | 0.576733  |
| 1  | -0.591592 | 0.202918  | -1.032876 |
| 1  | -3.496263 | 1.459922  | 1.872854  |
| 1  | -0.368855 | 4.153461  | 0.645337  |
| 6  | 0.872237  | 2.488615  | -1.083881 |
| 1  | 1.110007  | 3.558156  | -1.135990 |
| 1  | 0.851496  | 2.090941  | -2.105416 |
| 8  | 2.268721  | 1.813712  | 1.120166  |
| 6  | 2.739480  | -0.820689 | -0.170610 |
| 6  | 2.051970  | -2.042474 | -0.115736 |
| 6  | 4.016106  | -0.708475 | 0.356739  |
| 6  | 2.655577  | -3.151306 | 0.490432  |
| 6  | 4.593370  | -1.815660 | 0.969467  |
| 1  | 4.566151  | 0.225554  | 0.285599  |
| 6  | 3.920759  | -3.032150 | 1.041014  |
| 1  | 2.115415  | -4.093420 | 0.520845  |
| 1  | 5.591717  | -1.721847 | 1.388358  |
| 1  | 4.387301  | -3.888728 | 1.518199  |
| 6  | 0.756096  | -2.168824 | -0.691485 |
| 7  | -0.298739 | -2.290423 | -1.163121 |
| 1  | -2.386120 | 3.680763  | 2.014474  |
| 8  | 2.089810  | 0.213369  | -0.819032 |
| 8  | 3.523697  | 2.266007  | -1.007200 |
| 16 | 2.335569  | 1.777523  | -0.329665 |
| 8  | -2.643896 | -0.563256 | 0.398532  |
| 6  | -3.531849 | -1.064186 | -0.902121 |
| 8  | -2.698138 | -0.988480 | -1.936383 |
| 6  | -4.676268 | -0.115252 | -1.002165 |
| 8  | -3.915812 | -2.282161 | -0.481366 |
| 1  | -3.197457 | -2.931414 | -0.565671 |
| 1  | -4.416894 | -1.989320 | 2.219324  |
| 1  | -3.209236 | -0.819139 | 1.297499  |
| 8  | -3.989082 | -1.131806 | 2.366091  |
| 1  | -1.936240 | -1.603551 | -1.828157 |
| 1  | -3.470033 | -1.232761 | 3.178440  |
| 1  | -5.269057 | -0.136944 | -0.083589 |
| 1  | -5.305060 | -0.425343 | -1.842288 |
| 1  | -4.312730 | 0.898061  | -1.190445 |

---

---

[9']

---

---

Number of imaginary frequencies : 0

Electronic energy : =-1599.1492526  
Zero-point correction= 0.328950  
Thermal correction to Energy= 0.354536  
Thermal correction to Enthalpy= 0.355480  
Thermal correction to Gibbs Free Energy= 0.272974  
Sum of electronic and zero-point Energies= -1598.820302  
Sum of electronic and thermal Energies= -1598.794717  
Sum of electronic and thermal Enthalpies= -1598.793772  
Sum of electronic and thermal Free Energies= -1598.876278

.....  
Cartesian Coordinates  
.....

|    |           |           |           |
|----|-----------|-----------|-----------|
| 6  | -1.966460 | 3.214754  | 1.115844  |
| 6  | -2.568766 | 1.974656  | 1.288633  |
| 6  | -2.036008 | 0.856145  | 0.643209  |
| 6  | -0.935606 | 0.996023  | -0.200744 |
| 6  | -0.335279 | 2.241418  | -0.361913 |
| 6  | -0.842400 | 3.355450  | 0.307691  |
| 1  | -0.555545 | 0.120594  | -0.721226 |
| 1  | -3.444609 | 1.859927  | 1.924787  |
| 1  | -0.365157 | 4.325656  | 0.186395  |
| 6  | 0.877203  | 2.379240  | -1.226342 |
| 1  | 1.129852  | 3.426541  | -1.433388 |
| 1  | 0.811721  | 1.849287  | -2.184307 |
| 8  | 2.351523  | 1.928399  | 0.987951  |
| 6  | 2.784692  | -0.837663 | -0.075201 |
| 6  | 2.128794  | -2.072857 | 0.049811  |
| 6  | 4.061358  | -0.669870 | 0.436692  |
| 6  | 2.763433  | -3.138313 | 0.700165  |
| 6  | 4.669931  | -1.733751 | 1.094750  |
| 1  | 4.588388  | 0.272616  | 0.318716  |
| 6  | 4.030691  | -2.963149 | 1.229632  |
| 1  | 2.245605  | -4.089922 | 0.781451  |
| 1  | 5.668994  | -1.595919 | 1.499711  |
| 1  | 4.524016  | -3.784341 | 1.740602  |
| 6  | 0.829451  | -2.253371 | -0.498109 |
| 7  | -0.228675 | -2.419410 | -0.945411 |
| 1  | -2.378022 | 4.083379  | 1.624465  |
| 8  | 2.099657  | 0.137187  | -0.770484 |
| 8  | 3.530274  | 2.149177  | -1.218442 |
| 16 | 2.364162  | 1.744240  | -0.451813 |
| 8  | -2.544725 | -0.385116 | 0.804034  |
| 6  | -3.592252 | -1.521669 | -1.139868 |
| 8  | -2.544075 | -1.396521 | -1.851223 |
| 6  | -4.657548 | -0.524146 | -1.297149 |
| 8  | -3.828972 | -2.528259 | -0.373423 |
| 1  | -3.107621 | -3.185794 | -0.326733 |

|   |           |           |           |
|---|-----------|-----------|-----------|
| 1 | -5.098716 | -1.490339 | 2.108446  |
| 1 | -3.350628 | -0.374993 | 1.381438  |
| 8 | -4.902283 | -0.544587 | 2.074081  |
| 1 | -1.757311 | -1.973369 | -1.605338 |
| 1 | -4.924145 | -0.264087 | 2.998498  |
| 1 | -5.306721 | -0.513965 | -0.419421 |
| 1 | -5.251644 | -0.795901 | -2.178778 |
| 1 | -4.212934 | 0.459036  | -1.470973 |

-----  
---  
H<sub>2</sub>O  
-----  
---

Number of imaginary frequencies : 0

Electronic energy : =-76.3979104  
Zero-point correction= 0.021513  
Thermal correction to Energy= 0.024349  
Thermal correction to Enthalpy= 0.025293  
Thermal correction to Gibbs Free Energy= 0.003859  
Sum of electronic and zero-point Energies= -76.376397  
Sum of electronic and thermal Energies= -76.373561  
Sum of electronic and thermal Enthalpies= -76.372617  
Sum of electronic and thermal Free Energies= -76.394052

-----  
Cartesian Coordinates  
-----

|   |          |           |           |
|---|----------|-----------|-----------|
| 8 | 0.000000 | 0.000000  | 0.119899  |
| 1 | 0.000000 | 0.754451  | -0.479597 |
| 1 | 0.000000 | -0.754451 | -0.479597 |

-----End-----
